# Supplementary material
Source: publisher figshare collection journal article supplement (https://acs.figshare.com/ndownloader/files/28142997)
Supplement: Supplementary file 1 [file 28142997]

## Sheet: Core set of proteins
Table S2: Core set of 4730 proteins identified by mass spectrometry-based retinal proteomics of control and Pomt1 cKO mice using dimethyl labeling for relative quantification
Protein FDR Confidence: Combined	Master	Accession	Description	Exp. q-value: Combined	Coverage [%]	# Peptides	# PSMs	# Unique Peptides	# AAs	MW [kDa]	Score Mascot: Mascot	# PSMs (by Search Engine): Mascot	# Peptides (by Search Engine): Mascot	# Razor Peptides	Abundance Ratio: (Medium) / (Light)	Abundance Ratio Adj. P-Value: (Medium) / (Light)	Abundance Ratio Variability [%]: (Medium) / (Light)	Abundance Ratios (by Bio. Rep.): (Medium,1) / (Light,1)	Abundance Ratios (by Bio. Rep.): (Medium,2) / (Light,2)	Abundance Ratios (by Bio. Rep.): (Medium,3) / (Light,3)
High	Master Protein	P70202	Latexin OS=Mus musculus GN=Lxn PE=1 SV=2	0.001	8	1	1	1	222	25.5	65	1	1	0	100	1.01399e-16	0	100	100	100
High	Master Protein	Z4YJF5	Myomesin-1 OS=Mus musculus GN=Myom1 PE=1 SV=1	0	5	5	8	5	1569	175.4	244	8	5	0	100	1.01399e-16	0	100	100	100
High	Master Protein	Q65CL1	Catenin alpha-3 OS=Mus musculus GN=Ctnna3 PE=1 SV=2	0	5	3	9	2	895	99.7	228	9	3	0	100	1.01399e-16	0	100	100	100
High	Master Protein	O35367	Keratocan OS=Mus musculus GN=Kera PE=2 SV=1	0	44	11	41	11	351	40.4	1062	41	11	0	100	1.01399e-16	0	100	20.031	100
High	Master Protein	E9QMK3	Versican core protein OS=Mus musculus GN=Vcan PE=1 SV=1	0.001	3	1	1	1	655	74.3	68	1	1	0	100	1.01399e-16	0	100	100	100
High	Master Protein	P02104	Hemoglobin subunit epsilon-Y2 OS=Mus musculus GN=Hbb-y PE=1 SV=2	0	16	2	23	1	147	16.1	421	23	2	0	100	1.01399e-16	0	100	100	100
High	Master Protein	Q9CRB1	Galectin OS=Mus musculus GN=Lgals7 PE=1 SV=1	0	38	3	7	3	136	15.2	205	7	3	0	100	1.01399e-16	0	100	100	100
High	Master Protein	F6SHS0	Microtubule-actin cross-linking factor 1 (Fragment) OS=Mus musculus GN=Macf1 PE=1 SV=1	0	41	58	349	1	2030	230.4	7734	349	58	0	100	1.01399e-16	0	100	100	100
High	Master Protein	P23953	Carboxylesterase 1C OS=Mus musculus GN=Ces1c PE=1 SV=4	0	6	2	6	2	554	61	54	6	2	0	100	1.01399e-16	0	100	5.072	100
High	Master Protein	Q812E0	Cytoplasmic polyadenylation element-binding protein 2 OS=Mus musculus GN=Cpeb2 PE=1 SV=1	0	20	5	18	2	521	58.4	109	18	5	0	100	1.01399e-16	0	100	100	100
High	Master Protein	O08785	Circadian locomoter output cycles protein kaput OS=Mus musculus GN=Clock PE=1 SV=1	0	3	2	5	2	855	96.3	86	5	2	0	100	1.01399e-16	0	100	100	100
High	Master Protein	P31254	Ubiquitin-like modifier-activating enzyme 1 Y OS=Mus musculus GN=Uba1y PE=1 SV=2	0	11	11	151	1	1058	118	3289	151	11	0	100	1.01399e-16	0	100	100	100
High	Master Protein	P21812	Mast cell protease 4 OS=Mus musculus GN=Mcpt4 PE=1 SV=1	0.001	6	1	1	1	246	27.2	73	1	1	0	100	1.01399e-16	0	100	100	100
High	Master Protein	Q80X19	Collagen alpha-1(XIV) chain OS=Mus musculus GN=Col14a1 PE=1 SV=2	0	5	5	11	5	1797	192.9	140	11	5	0	100	1.01399e-16	0	100	100	100
High	Master Protein	Q62009	Periostin OS=Mus musculus GN=Postn PE=1 SV=2	0	16	9	23	9	838	93.1	672	23	9	0	100	1.01399e-16	0	100	100	100
High	Master Protein	Q3UV11	Keratin, type II cytoskeletal 6B OS=Mus musculus GN=Krt6b PE=1 SV=1	0	55	33	406	3	554	59.5	7942	406	33	0	100	1.01399e-16	0	100	5.62	100
High	Master Protein	Q61908	Cx9C motif-containing protein 4 OS=Mus musculus GN=Cmc4 PE=2 SV=1	0	16	1	2	1	68	7.7	66	2	1	0	100	1.01399e-16	0	100	100	100
High	Master Protein	P13541	Myosin-3 OS=Mus musculus GN=Myh3 PE=2 SV=2	0	31	53	240	17	1940	223.7	5316	240	53	1	100	1.01399e-16	0	100	60.078	100
High	Master Protein	P31001	Desmin OS=Mus musculus GN=Des PE=1 SV=3	0	20	8	187	4	469	53.5	2775	187	8	0	100	1.01399e-16	0	100	4.134	100
High	Master Protein	Q8BVF2	Phosducin-like protein 3 OS=Mus musculus GN=Pdcl3 PE=1 SV=1	0	13	2	3	2	240	27.6	61	3	2	0	100	1.01399e-16	0	100	100	100
High	Master Protein	Q61387	Cytochrome c oxidase subunit 7A-related protein, mitochondrial OS=Mus musculus GN=Cox7a2l PE=1 SV=1	0	50	3	11	3	111	12.4	142	11	3	0	19.617	1.01399e-16	121.28	100	19.617	3.57
High	Master Protein	A0A0N4SV40	Plasminogen activator inhibitor 1 RNA-binding protein (Fragment) OS=Mus musculus GN=Serbp1 PE=1 SV=1	0	35	7	156	1	186	20.6	1658	156	7	0	23.991	1.01399e-16	130.62	23.991	2.854	100
High	Master Protein	P51658	Estradiol 17-beta-dehydrogenase 2 OS=Mus musculus GN=Hsd17b2 PE=1 SV=2	0	8	2	3	2	381	41.8	69	3	2	0	100	1.01399e-16	0	14.046	100	100
High	Master Protein	Q8R0W0	Epiplakin OS=Mus musculus GN=Eppk1 PE=1 SV=2	0	10	6	25	4	6548	724.2	432	25	6	0	26.625	1.01399e-16	70.68	13.932	26.625	100
High	Master Protein	A0A0R4J0I1	MCG1051009 OS=Mus musculus GN=Serpina3k PE=1 SV=1	0	31	9	41	3	418	46.6	1004	41	9	6	9.16	1.01399e-16	65.36	13.198	9.16	2.038
High	Master Protein	P63268	Actin, gamma-enteric smooth muscle OS=Mus musculus GN=Actg2 PE=1 SV=1	0	73	25	2357	4	376	41.9	42393	2357	25	0	7.981	1.01399e-16	41.96	13.172	5.723	7.981
High	Master Protein	P23927	Alpha-crystallin B chain OS=Mus musculus GN=Cryab PE=1 SV=2	0	58	8	80	8	175	20.1	1586	80	8	0	14.942	1.01399e-16	33.41	8.922	14.942	18.309
High	Master Protein	P22599	Alpha-1-antitrypsin 1-2 OS=Mus musculus GN=Serpina1b PE=1 SV=2	0	41	13	132	3	413	45.9	2860	132	13	10	4.708	1.01399e-16	42.43	7.003	4.708	3.361
High	Master Protein	Q6GQT1	Alpha-2-macroglobulin-P OS=Mus musculus GN=A2m PE=2 SV=2	0	39	39	186	39	1474	164.2	2710	186	39	0	5.547	1.01399e-16	22.38	6.86	4.71	5.547
High	Master Protein	P15655	Fibroblast growth factor 2 OS=Mus musculus GN=Fgf2 PE=1 SV=1	0	43	7	44	7	154	17.1	427	44	7	0	5.388	1.01399e-16	74.19	5.388	17.802	2.692
High	Master Protein	P03995	Glial fibrillary acidic protein OS=Mus musculus GN=Gfap PE=1 SV=4	0	74	41	781	36	430	49.9	14581	781	41	3	7.827	1.01399e-16	14.55	3.998	8.595	7.827
High	Master Protein	P16390	Potassium voltage-gated channel subfamily A member 3 OS=Mus musculus GN=Kcna3 PE=1 SV=3	0	8	3	11	1	528	58.5	93	11	3	0	4.572	0.000638377	37.72	3.409	4.572	100
High	Master Protein	P97457	Myosin regulatory light chain 2, skeletal muscle isoform OS=Mus musculus GN=Mylpf PE=1 SV=3	0	82	10	66	10	169	18.9	1166	66	10	0	59.696	1.01399e-16	100.1	3.388	59.696	100
High	Master Protein	Q9DBK7	MCG18845, isoform CRA_d OS=Mus musculus GN=Uba7 PE=1 SV=1	0.001	2	2	4	1	977	108.6	52	4	2	0	5.368	2.51596e-05	57.31	3.293	5.368	100
High	Master Protein	P21614	Vitamin D-binding protein OS=Mus musculus GN=Gc PE=1 SV=2	0	12	4	16	4	476	53.6	307	16	4	0	3.814	4.21771e-12	31.13	3.013	3.814	4.778
High	Master Protein	G3X8U3	MCG6895 OS=Mus musculus GN=2210016F16Rik PE=1 SV=1	0	12	3	19	3	338	38.6	173	19	3	0	3.003	2.79786e-07	29.45	3.003	3.6	2.011
High	Master Protein	Q8K356	Lymphocyte antigen 6 complex, locus H OS=Mus musculus GN=Ly6h PE=1 SV=1	0	36	5	28	5	160	17	429	28	5	0	2.426	1.29952e-06	24.05	2.904	2.426	2.032
High	Master Protein	Q91X72	Hemopexin OS=Mus musculus GN=Hpx PE=1 SV=2	0	21	8	21	8	460	51.3	238	21	8	0	4.061	1.01399e-16	16.55	2.892	4.061	4.514
High	Master Protein	Q9WVL3	Solute carrier family 12 member 7 OS=Mus musculus GN=Slc12a7 PE=1 SV=1	0	9	8	43	5	1083	119.4	411	43	8	0	2.883	0.00438669	12.12	2.883	2.648	100
High	Master Protein	Q64282	Interferon-induced protein with tetratricopeptide repeats 1 OS=Mus musculus GN=Ifit1 PE=1 SV=2	0	16	5	25	5	463	53.7	351	25	5	0	3.274	6.65065e-06	18.6	2.863	7.998	3.274
High	Master Protein	P42227	Signal transducer and activator of transcription 3 OS=Mus musculus GN=Stat3 PE=1 SV=2	0	40	20	127	20	770	88	1127	127	20	0	2.815	1.36261e-10	6.61	2.815	2.69	3.331
High	Master Protein	Q8R502	Volume-regulated anion channel subunit LRRC8C OS=Mus musculus GN=Lrrc8c PE=1 SV=1	0	11	6	9	6	803	92.3	106	9	6	0	2.726	0.00222617	9.93	2.726	2.544	100
High	Master Protein	Q64339	Ubiquitin-like protein ISG15 OS=Mus musculus GN=Isg15 PE=1 SV=4	0	34	3	12	3	161	17.9	114	12	3	0	3.364	0.000111995	24.22	2.717	3.914	3.364
High	Master Protein	D3Z3L3	Tripartite motif-containing 12C OS=Mus musculus GN=Trim12c PE=1 SV=2	0	7	2	6	2	497	57.8	168	6	2	0	3.162	0.0174728	23.58	2.659	3.162	4.697
High	Master Protein	Q9Z0E6	Guanylate-binding protein 2 OS=Mus musculus GN=Gbp2 PE=1 SV=1	0	11	4	17	4	589	66.7	234	17	4	0	4.195	1.01399e-16	55.49	2.625	4.195	7.814
High	Master Protein	P07724	Serum albumin OS=Mus musculus GN=Alb PE=1 SV=3	0	77	40	1587	40	608	68.6	36775	1587	40	0	2.791	1.01399e-16	8.39	2.62	2.791	2.949
High	Master Protein	Q8VD62	UPF0696 protein C11orf68 homolog OS=Mus musculus GN=Bles03 PE=1 SV=1	0	13	3	12	3	251	27.5	260	12	3	0	5.614	1.23327e-08	83.44	2.455	5.614	100
High	Master Protein	P29699	Alpha-2-HS-glycoprotein OS=Mus musculus GN=Ahsg PE=1 SV=1	0	16	3	16	3	345	37.3	497	16	3	0	2.933	5.26293e-07	13.07	2.238	3.191	2.933
High	Master Protein	E9QMH7	Inhibitor of nuclear factor kappa-B kinase-interacting protein OS=Mus musculus GN=Ikbip PE=1 SV=1	0	11	3	12	3	373	42.5	226	12	3	0	2.276	0.182171	5.37	2.194	2.397	2.276
High	Master Protein	Q6Q899	Probable ATP-dependent RNA helicase DDX58 OS=Mus musculus GN=Ddx58 PE=1 SV=2	0	6	4	17	4	926	105.9	87	17	4	0	2.161	0.0402631	3.79	2.161	2.105	2.98
High	Master Protein	Q3UIR3	E3 ubiquitin-protein ligase DTX3L OS=Mus musculus GN=Dtx3l PE=1 SV=1	0.001	2	1	6	1	748	83	115	6	1	0	2.605	0.0596899	3.38	2.146	2.664	2.605
High	Master Protein	E9QA02	Transporter (Fragment) OS=Mus musculus GN=Slc6a9 PE=1 SV=1	0	14	4	40	2	321	35.6	824	40	4	0	2.728	3.75584e-05	26.04	2.14	2.728	3.207
High	Master Protein	P50114	Protein S100-B OS=Mus musculus GN=S100b PE=1 SV=2	0	37	3	48	3	92	10.7	1447	48	3	0	2.164	4.23419e-05	5.29	2.087	2.779	2.164
High	Master Protein	Q8BYK8	Zinc finger CCCH domain-containing protein 6 OS=Mus musculus GN=Zc3h6 PE=2 SV=2	0	10	8	20	8	1177	131.2	183	20	8	0	1	0.997037	33.92	1.986	0.813	1
High	Master Protein	Q9EQK5	Major vault protein OS=Mus musculus GN=Mvp PE=1 SV=4	0	23	14	38	14	861	95.9	746	38	14	0	1.981	0.000169638	0.13	1.981	1.982	1.885
High	Master Protein	Q8R1G2	Carboxymethylenebutenolidase homolog OS=Mus musculus GN=Cmbl PE=1 SV=1	0	21	4	26	4	245	27.9	423	26	4	0	1.569	0.177003	38.53	1.976	1.569	1.097
High	Master Protein	Q8R0X7	Sphingosine-1-phosphate lyase 1 OS=Mus musculus GN=Sgpl1 PE=1 SV=1	0	13	5	15	5	568	63.6	289	15	5	0	1.365	0.256587	0.2	1.973	1.363	1.365
High	Master Protein	Q8VD75	Huntingtin-interacting protein 1 OS=Mus musculus GN=Hip1 PE=1 SV=2	0	13	10	25	9	1029	115.1	501	25	10	0	1.296	0.6623	54.55	1.938	0.819	1.296
High	Master Protein	A0A0U1RP54	Phosphorylase b kinase gamma catalytic chain, liver/testis isoform (Fragment) OS=Mus musculus GN=Phkg2 PE=1 SV=1	0.002	16	1	2	1	104	11.8	70	2	1	0	1.612	0.706904	29.65	1.934	1.269	1.612
High	Master Protein	Q62087	Serum paraoxonase/lactonase 3 OS=Mus musculus GN=Pon3 PE=1 SV=2	0	13	2	10	2	354	39.3	133	10	2	0	0.84	0.816924	36.24	1.923	0.84	0.675
High	Master Protein	Q9Z2W8	Glutamate receptor 4 OS=Mus musculus GN=Gria4 PE=1 SV=2	0	4	3	18	2	902	100.8	639	18	3	0	1.39	0.379447	23.22	1.921	1.172	1.39
High	Master Protein	Q9WV32	Actin-related protein 2/3 complex subunit 1B OS=Mus musculus GN=Arpc1b PE=1 SV=4	0	27	6	42	5	372	41	715	42	6	0	1.832	0.000922814	5.22	1.919	1.832	1.768
High	Master Protein	Q9R013	Cathepsin F OS=Mus musculus GN=Ctsf PE=1 SV=1	0	7	2	8	2	462	51.6	319	8	2	0	1.29	0.452548	41.78	1.912	0.927	1.29
High	Master Protein	D3Z2E9	RIKEN cDNA 2010107G23 gene (Fragment) OS=Mus musculus GN=2010107G23Rik PE=1 SV=8	0	30	3	21	3	122	13.3	432	21	3	0	0.851	0.706196	18.1	1.885	0.851	0.759
High	Master Protein	A0A1B0GS77	Aryl hydrocarbon receptor nuclear translocator-like protein 1 OS=Mus musculus GN=Arntl PE=1 SV=1	0	10	3	17	3	633	69.5	64	17	3	0	1.116	0.988622	18.12	1.884	1.116	0.98
High	Master Protein	P54103	DnaJ homolog subfamily C member 2 OS=Mus musculus GN=Dnajc2 PE=1 SV=2	0	23	7	26	7	621	71.7	165	26	7	0	1.139	0.956465	15.89	1.876	1.139	1.017
High	Master Protein	Q3ULJ0	Glycerol-3-phosphate dehydrogenase 1-like protein OS=Mus musculus GN=Gpd1l PE=1 SV=2	0	14	4	19	4	351	38.2	341	19	4	0	1.348	0.285236	10.7	1.865	1.251	1.348
High	Master Protein	Q61112	45 kDa calcium-binding protein OS=Mus musculus GN=Sdf4 PE=1 SV=1	0	18	3	14	3	361	42	51	14	3	0	1.849	0.0285142	0.8	1.859	1.004	1.849
High	Master Protein	Z4YL66	DNA helicase INO80 OS=Mus musculus GN=Ino80 PE=1 SV=1	0	3	3	11	3	1141	131.6	74	11	3	0	1.488	0.0604275	28.55	1.85	1.201	1.488
High	Master Protein	Q3UTJ2	Sorbin and SH3 domain-containing protein 2 OS=Mus musculus GN=Sorbs2 PE=1 SV=2	0	31	24	222	1	1180	132.3	2287	222	24	22	1.733	0.00247092	9.8	1.848	1.733	1.416
High	Master Protein	Q9CQ73	Plakophilin 2 OS=Mus musculus GN=Pkp2 PE=1 SV=1	0	9	6	9	6	795	88	83	9	6	0	1.383	0.780179	2.18	1.837	1.383	1.363
High	Master Protein	Q62159	Rho-related GTP-binding protein RhoC OS=Mus musculus GN=Rhoc PE=1 SV=2	0	68	12	241	4	193	22	3839	241	12	0	1.58	0.0296054	23.23	1.827	1.297	1.58
High	Master Protein	A0A0R4J0U7	COMM domain-containing protein 5 OS=Mus musculus GN=Commd5 PE=1 SV=1	0	44	6	30	6	224	24.5	337	30	6	0	1.051	0.993902	12.18	1.827	0.964	1.051
High	Master Protein	Q9D1Q1	M-phase phosphoprotein 6 OS=Mus musculus GN=Mphosph6 PE=1 SV=1	0	16	2	7	2	161	19.1	141	7	2	0	1.217	0.934897	55.86	1.823	1.217	0.758
High	Master Protein	Q8BHB9	Chloride intracellular channel protein 6 OS=Mus musculus GN=Clic6 PE=1 SV=1	0	33	10	58	10	596	62.8	856	58	10	0	0.941	0.901594	71.56	1.82	0.529	0.941
High	Master Protein	Q8VBT9	Tether containing UBX domain for GLUT4 OS=Mus musculus GN=Aspscr1 PE=1 SV=1	0	28	7	25	7	550	59.8	180	25	7	0	1.276	0.729098	24.15	1.816	1.068	1.276
High	Master Protein	P26041	Moesin OS=Mus musculus GN=Msn PE=1 SV=3	0	54	26	284	16	577	67.7	4075	284	26	12	1.632	0.00018342	16.57	1.814	1.45	1.632
High	Master Protein	Q69Z89	Ras-associating and dilute domain-containing protein OS=Mus musculus GN=Radil PE=1 SV=2	0	9	4	11	4	1099	120.3	77	11	4	0	0.96	0.958258	16.43	1.812	0.96	0.864
High	Master Protein	Q8K449	ATP-binding cassette sub-family A member 9 OS=Mus musculus GN=Abca9 PE=1 SV=2	0	3	3	16	1	1623	183	94	16	3	0	1.483	0.533673	32.41	1.808	1.483	0.773
High	Master Protein	S4R216	G1/S-specific cyclin-D3 OS=Mus musculus GN=Ccnd3 PE=1 SV=1	0.001	13	1	3	1	96	9.7	123	3	1	0	1.798	0.380302	14.9	1.798	1.177	1.978
High	Master Protein	A0A0R4J0J8	Cytospin-A OS=Mus musculus GN=Specc1l PE=1 SV=1	0	8	5	9	5	1135	126.5	104	9	5	0	1.267	0.913711	38.32	1.794	1.267	0.94
High	Master Protein	Q8VCM7	Fibrinogen gamma chain OS=Mus musculus GN=Fgg PE=1 SV=1	0	19	6	18	6	436	49.4	206	18	6	0	1.786	0.00390335	12.07	1.786	1.931	1.637
High	Master Protein	Q9Z1Q5	Chloride intracellular channel protein 1 OS=Mus musculus GN=Clic1 PE=1 SV=3	0	60	10	46	10	241	27	466	46	10	0	1.511	0.0642	26.67	1.783	1.511	1.222
High	Master Protein	Q9QZC2	Plexin-C1 OS=Mus musculus GN=Plxnc1 PE=1 SV=1	0	4	5	15	4	1574	176.4	244	15	5	0	1.144	0.98513	12.95	1.781	1.144	1.044
High	Master Protein	Q925E7	Serine/threonine-protein phosphatase 2A 55 kDa regulatory subunit B delta isoform OS=Mus musculus GN=Ppp2r2d PE=1 SV=1	0	37	9	65	4	453	51.9	1697	65	9	0	1.78	0.169017	3.35	1.78	1.946	1.74
High	Master Protein	Q9D379	Epoxide hydrolase 1 OS=Mus musculus GN=Ephx1 PE=1 SV=2	0	52	17	186	17	455	52.5	2566	186	17	0	1.564	0.00593607	9.65	1.778	1.462	1.564
High	Master Protein	Q9CQS2	H/ACA ribonucleoprotein complex subunit 3 OS=Mus musculus GN=Nop10 PE=3 SV=1	0	63	3	28	3	64	7.7	686	28	3	0	1.616	0.122445	14.59	1.775	1.11	1.616
High	Master Protein	G3X9N3	MCG16539 OS=Mus musculus GN=Pnmal2 PE=1 SV=1	0	13	6	37	6	661	71.7	712	37	6	0	1.293	0.686364	7.24	1.771	1.23	1.293
High	Master Protein	Q80XH2	Interphotoreceptor matrix proteoglycan 2 OS=Mus musculus GN=Impg2 PE=1 SV=1	0	20	18	168	18	1243	138	3374	168	18	0	0.918	0.724772	71.26	1.767	0.918	0.595
High	Master Protein	B2KF50	UHRF1 (ICBP90)-binding protein 1 OS=Mus musculus GN=Uhrf1bp1 PE=1 SV=1	0	7	6	11	6	1429	156.9	154	11	6	0	0.851	0.827802	28.18	1.76	0.851	0.715
High	Master Protein	Q9CR09	Ubiquitin-fold modifier-conjugating enzyme 1 OS=Mus musculus GN=Ufc1 PE=1 SV=1	0	31	6	50	6	167	19.5	348	50	6	0	1.343	0.322461	45.96	1.759	0.79	1.343
High	Master Protein	A2BE28	Ribosomal biogenesis protein LAS1L OS=Mus musculus GN=Las1l PE=1 SV=1	0	2	1	7	1	776	89.4	88	7	1	0	1.024	0.988622	2.72	1.746	1.005	1.024
High	Master Protein	Q9QX96	Sal-like protein 2 OS=Mus musculus GN=Sall2 PE=1 SV=2	0	6	3	9	3	1004	104.9	95	9	3	0	1.722	0.471302	2.07	1.746	1.722	1.304
High	Master Protein	Q3TC93	HCLS1-binding protein 3 OS=Mus musculus GN=Hs1bp3 PE=1 SV=2	0	15	3	9	3	395	43.7	132	9	3	0	1.446	0.669511	27.86	1.725	1.174	1.446
High	Master Protein	Q9QXJ2	Signal transducer and activator of transcription OS=Mus musculus GN=Stat2 PE=1 SV=1	0	2	1	6	1	922	105.3	193	6	1	0	1.638	0.45247	6.84	1.713	1.058	1.638
High	Master Protein	P08226	Apolipoprotein E OS=Mus musculus GN=Apoe PE=1 SV=2	0	36	10	58	10	311	35.8	831	58	10	0	1.417	0.16927	22.13	1.691	1.206	1.417
High	Master Protein	E9Q1W7	TBC domain-containing protein kinase-like protein OS=Mus musculus GN=Tbck PE=1 SV=1	0	7	4	11	4	893	100.6	152	11	4	0	1.211	0.922517	6.44	1.69	1.211	1.159
High	Master Protein	E9QLA5	Inverted formin-2 OS=Mus musculus GN=Inf2 PE=1 SV=1	0	12	10	38	10	1271	138.3	299	38	10	0	1.412	0.155033	20.8	1.688	1.214	1.412
High	Master Protein	P14824	Annexin A6 OS=Mus musculus GN=Anxa6 PE=1 SV=3	0	48	26	130	26	673	75.8	2925	130	26	0	1.685	0.00356102	17.58	1.685	1.485	1.951
High	Master Protein	P52430	Serum paraoxonase/arylesterase 1 OS=Mus musculus GN=Pon1 PE=1 SV=2	0	42	8	67	8	355	39.5	1266	67	8	0	0.995	0.966263	60.64	1.683	0.579	0.995
High	Master Protein	E9Q7B0	Prolyl 4-hydroxylase subunit alpha-1 OS=Mus musculus GN=P4ha1 PE=1 SV=1	0	17	6	19	6	454	51.7	414	19	6	0	1.676	0.207877	15.71	1.676	1.217	1.853
High	Master Protein	P21460	Cystatin-C OS=Mus musculus GN=Cst3 PE=1 SV=2	0	25	2	23	2	140	15.5	614	23	2	0	1.49	0.0780526	8.59	1.667	1.404	1.49
High	Master Protein	Q8C129	Leucyl-cystinyl aminopeptidase OS=Mus musculus GN=Lnpep PE=1 SV=1	0	13	9	53	9	1025	117.2	1079	53	9	0	1.343	0.324019	31.66	1.664	1.056	1.343
High	Master Protein	O88456	Calpain small subunit 1 OS=Mus musculus GN=Capns1 PE=1 SV=1	0	41	7	38	7	269	28.4	922	38	7	0	1.664	0.00929277	7.36	1.664	1.898	1.581
High	Master Protein	D3Z4W5	RIKEN cDNA 1700074P13 gene (Fragment) OS=Mus musculus GN=1700074P13Rik PE=3 SV=1	0.002	4	1	10	1	176	20.1	161	10	1	0	1.663	0.00241642	4.17	1.663	0.678	1.71
High	Master Protein	F7CC56	RB1-inducible coiled-coil protein 1 (Fragment) OS=Mus musculus GN=Rb1cc1 PE=1 SV=1	0	4	5	8	5	1468	168.9	51	8	5	0	1.577	0.459524	7.8	1.66	1.096	1.577
High	Master Protein	P52760	2-iminobutanoate/2-iminopropanoate deaminase OS=Mus musculus GN=Rida PE=1 SV=3	0	67	7	44	7	135	14.2	576	44	7	0	1.483	0.0884843	13.9	1.657	1.344	1.483
High	Master Protein	Q9CQY2	RNMT-activating mini protein OS=Mus musculus GN=Fam103a1 PE=3 SV=1	0	35	4	22	4	119	14.5	148	22	4	0	1.657	0.0125692	19.26	1.657	1.872	0.992
High	Master Protein	P09528	Ferritin heavy chain OS=Mus musculus GN=Fth1 PE=1 SV=2	0	64	9	209	9	182	21.1	2319	209	9	0	1.356	0.196756	14.79	1.652	1.356	1.221
High	Master Protein	A2A8L5	Receptor-type tyrosine-protein phosphatase F OS=Mus musculus GN=Ptprf PE=1 SV=1	0	20	24	65	16	1898	211.4	629	65	24	0	1.652	0.00869479	4.07	1.652	1.698	1.372
High	Master Protein	Q6NZN0	RNA-binding protein 26 OS=Mus musculus GN=Rbm26 PE=1 SV=2	0	17	13	65	12	1012	114.1	1134	65	13	1	1.022	0.993902	37.71	1.647	1.022	0.762
High	Master Protein	Q8BKC5	Importin-5 OS=Mus musculus GN=Ipo5 PE=1 SV=3	0	59	40	352	39	1097	123.5	7211	352	40	1	1.565	0.00184127	7.57	1.645	1.428	1.565
High	Master Protein	O35409	Glutamate carboxypeptidase 2 OS=Mus musculus GN=Folh1 PE=1 SV=2	0	32	18	95	18	752	84.5	1076	95	18	0	1.642	0.0105989	1.6	1.642	1.66	1.308
High	Master Protein	E0CZD7	Traf2 and NCK-interacting protein kinase OS=Mus musculus GN=Tnik PE=1 SV=1	0	13	11	46	10	1276	145.1	406	46	11	0	1.278	0.615737	39.26	1.639	1.278	0.94
High	Master Protein	Q9WTQ5	A-kinase anchor protein 12 OS=Mus musculus GN=Akap12 PE=1 SV=1	0	35	30	219	30	1684	180.6	4018	219	30	0	1.638	0.0149363	6.98	1.638	1.561	1.742
High	Master Protein	G5E8W8	Zinc finger protein 185 OS=Mus musculus GN=Zfp185 PE=1 SV=1	0	31	7	23	7	486	52.8	253	23	7	0	1.638	0.277106	29.81	1.638	1.967	1.151
High	Master Protein	Q8C0W0	Thymosin beta 15b-like OS=Mus musculus GN=Tmsb15l PE=1 SV=1	0	38	2	7	2	80	9.2	74	7	2	0	1.408	0.422207	16.55	1.636	1.251	1.408
High	Master Protein	Q8VHL0	Urea transporter 1 OS=Mus musculus GN=Slc14a1 PE=1 SV=2	0	9	4	61	4	384	42.1	665	61	4	0	1.452	0.0686848	17.65	1.625	1.255	1.452
High	Master Protein	Q2TPA8	Hydroxysteroid dehydrogenase-like protein 2 OS=Mus musculus GN=Hsdl2 PE=1 SV=1	0	26	7	15	7	490	54.2	156	15	7	0	1.098	0.975388	4.47	1.619	1.065	1.098
High	Master Protein	P13020	Gelsolin OS=Mus musculus GN=Gsn PE=1 SV=3	0	21	11	62	10	780	85.9	705	62	11	1	1.915	0.000254282	2.1	1.614	1.942	1.915
High	Master Protein	Q9JHS9	Spliceosome-associated protein CWC15 homolog OS=Mus musculus GN=Cwc15 PE=1 SV=1	0	29	6	20	6	229	26.6	174	20	6	0	1.576	0.0277181	3.23	1.61	1.576	1.492
High	Master Protein	Q8BTM8	Filamin-A OS=Mus musculus GN=Flna PE=1 SV=5	0	49	81	532	76	2647	281	10676	532	81	5	1.39	0.0204014	10.33	1.606	1.293	1.39
High	Master Protein	Q91WB7	Ubiquitin domain-containing protein 1 OS=Mus musculus GN=Ubtd1 PE=2 SV=1	0	34	4	25	4	227	26	238	25	4	0	1.605	0.480046	15.37	1.605	1.772	1.198
High	Master Protein	Q8BPU7	Engulfment and cell motility protein 1 OS=Mus musculus GN=Elmo1 PE=1 SV=2	0	8	4	11	2	727	83.9	103	11	4	0	0.91	0.955218	11.77	1.604	0.91	0.843
High	Master Protein	Q70IV5	Synemin OS=Mus musculus GN=Synm PE=1 SV=2	0	20	19	92	19	1561	173.1	1382	92	19	0	1.484	0.106911	9.02	1.603	1.484	1.394
High	Master Protein	A0A0G2JFK2	Far upstream element-binding protein 1 (Fragment) OS=Mus musculus GN=Fubp1 PE=1 SV=1	0	65	14	218	3	306	32.4	2707	218	14	0	1.396	0.43059	21.32	1.597	1.118	1.396
High	Master Protein	P70245	3-beta-hydroxysteroid-Delta(8),Delta(7)-isomerase OS=Mus musculus GN=Ebp PE=1 SV=3	0	15	3	26	3	230	26.2	650	26	3	0	1.224	0.667712	45.09	1.597	1.224	0.765
High	Master Protein	H3BIV6	Cysteine and histidine-rich protein 1 OS=Mus musculus GN=Cyhr1 PE=1 SV=1	0	8	2	4	2	412	43.2	52	4	2	0	1.414	0.746593	19.01	1.595	0.856	1.414
High	Master Protein	Q99LB6	Methionine adenosyltransferase 2 subunit beta OS=Mus musculus GN=Mat2b PE=1 SV=1	0	53	11	55	11	334	37.4	696	55	11	0	1.264	0.548101	16.85	1.594	1.121	1.264
High	Master Protein	Q62376	U1 small nuclear ribonucleoprotein 70 kDa OS=Mus musculus GN=Snrnp70 PE=1 SV=2	0	39	16	341	16	448	52	3476	341	16	0	1.196	0.450686	33.51	1.594	1.196	0.925
High	Master Protein	P97785	GDNF family receptor alpha-1 OS=Mus musculus GN=Gfra1 PE=2 SV=2	0	9	3	22	3	468	51.7	746	22	3	0	1.571	0.0712335	1.98	1.592	1.571	1.131
High	Master Protein	Q6P3Z3	THAP domain-containing protein 4 OS=Mus musculus GN=Thap4 PE=1 SV=1	0	6	2	5	2	569	62.5	80	5	2	0	1.589	0.51288	1.43	1.589	0.65	1.605
High	Master Protein	Q9CWS0	N(G),N(G)-dimethylarginine dimethylaminohydrolase 1 OS=Mus musculus GN=Ddah1 PE=1 SV=3	0	69	20	420	19	285	31.4	7616	420	20	1	1.231	0.300652	11.85	1.588	1.132	1.231
High	Master Protein	Q8VD63	Testis-specific Y-encoded-like protein 4 OS=Mus musculus GN=Tspyl4 PE=1 SV=1	0	6	2	30	2	406	44.8	555	30	2	0	1.434	0.465829	15.31	1.582	0.77	1.434
High	Master Protein	Q9CR39	WD repeat domain phosphoinositide-interacting protein 3 OS=Mus musculus GN=Wdr45b PE=1 SV=2	0	15	4	10	4	344	38	97	10	4	0	1.279	0.700112	0.7	1.58	1.279	1.273
High	Master Protein	Q8CC21	Tetratricopeptide repeat protein 19, mitochondrial OS=Mus musculus GN=Ttc19 PE=1 SV=1	0	13	3	21	3	365	41.2	504	21	3	0	1.547	0.459082	3.17	1.58	0.976	1.547
High	Master Protein	A0A1L1SV25	Alpha-actinin-4 OS=Mus musculus GN=Actn4 PE=1 SV=1	0	71	58	792	1	932	107	17332	792	58	68	1.576	0.000641622	11.73	1.576	1.701	1.349
High	Master Protein	Q3UH68	LIM and calponin homology domains-containing protein 1 OS=Mus musculus GN=Limch1 PE=1 SV=2	0	20	12	35	12	1057	118.1	193	35	12	0	1.227	0.671807	21.02	1.573	1.053	1.227
High	Master Protein	A0A1L1STY4	Uveal autoantigen with coiled-coil domains and ankyrin repeats (Fragment) OS=Mus musculus GN=Uaca PE=1 SV=1	0	3	3	14	3	1236	140.5	148	14	3	0	1.571	0.545268	18.36	1.571	1.782	1.377
High	Master Protein	Q8R5L1	Complement component 1 Q subcomponent-binding protein, mitochondrial OS=Mus musculus GN=C1qbp PE=1 SV=1	0	37	6	67	6	279	31	1412	67	6	0	1.452	0.108503	10.64	1.571	1.452	1.347
High	Master Protein	P84078	ADP-ribosylation factor 1 OS=Mus musculus GN=Arf1 PE=1 SV=2	0	83	13	659	1	181	20.7	15612	659	13	0	1.289	0.879381	32.24	1.569	0.896	1.289
High	Master Protein	D3Z2H9	Tropomyosin 3, related sequence 7 OS=Mus musculus GN=Tpm3-rs7 PE=3 SV=1	0	35	11	121	0	248	29	1461	121	11	2	1.492	0.0924389	7.58	1.568	1.492	1.379
High	Master Protein	Q9CQR4	Acyl-coenzyme A thioesterase 13 OS=Mus musculus GN=Acot13 PE=1 SV=1	0	44	5	81	5	140	15.2	1391	81	5	0	1.462	0.0857401	10.44	1.565	1.037	1.462
High	Master Protein	Q9CQ80	Vacuolar protein-sorting-associated protein 25 OS=Mus musculus GN=Vps25 PE=1 SV=1	0	19	3	32	3	176	20.7	413	32	3	0	1.361	0.537477	22.11	1.564	1.361	1.06
High	Master Protein	Q8VE92	RNA-binding protein 4B OS=Mus musculus GN=Rbm4b PE=1 SV=1	0	22	7	30	7	357	40	397	30	7	0	1.001	0.985949	12.36	1.562	1.001	0.918
High	Master Protein	A2AEC2	Transcription elongation factor A protein-like 3 (Fragment) OS=Mus musculus GN=Tceal3 PE=1 SV=1	0	45	9	253	2	176	19.9	1243	253	9	0	1.56	0.0397842	1.4	1.56	1.545	1.694
High	Master Protein	Q9CQ06	39S ribosomal protein L24, mitochondrial OS=Mus musculus GN=Mrpl24 PE=1 SV=1	0	13	2	13	2	216	24.9	254	13	2	0	1.348	0.845198	22.96	1.557	1.348	0.911
High	Master Protein	Q9CZG9	PDZ domain-containing protein 11 OS=Mus musculus GN=Pdzd11 PE=1 SV=1	0	66	6	21	5	140	16.2	406	21	6	1	1.106	0.949158	23.62	1.556	0.93	1.106
High	Master Protein	P98203	Armadillo repeat protein deleted in velo-cardio-facial syndrome homolog OS=Mus musculus GN=Arvcf PE=1 SV=2	0	42	27	188	27	962	105	3823	188	27	0	1.494	0.0577999	6.16	1.556	1.418	1.494
High	Master Protein	O35126	Atrophin-1 OS=Mus musculus GN=Atn1 PE=1 SV=1	0	14	7	12	7	1175	123.6	88	12	7	0	0.976	0.984017	20.21	1.553	0.976	0.859
High	Master Protein	Q9CQ89	Protein CutA OS=Mus musculus GN=Cuta PE=1 SV=3	0	34	2	19	2	177	18.9	176	19	2	0	0.94	0.930091	58.4	1.551	0.94	0.63
High	Master Protein	Q9CR60	Vesicle transport protein GOT1B OS=Mus musculus GN=Golt1b PE=1 SV=1	0	17	2	29	2	138	15.4	528	29	2	0	0.92	0.918724	55.1	1.55	0.671	0.92
High	Master Protein	P61963	DDB1- and CUL4-associated factor 7 OS=Mus musculus GN=Dcaf7 PE=1 SV=1	0	27	6	19	6	342	38.9	310	19	6	0	0.956	0.933429	22.27	1.549	0.831	0.956
High	Master Protein	Q6PFF0	SR-related CTD-associated factor 4 OS=Mus musculus GN=Scaf4 PE=1 SV=1	0	10	8	33	7	1209	131.6	383	33	8	0	1.311	0.644259	26.86	1.549	1.311	0.71
High	Master Protein	P61092	E3 ubiquitin-protein ligase SIAH1A OS=Mus musculus GN=Siah1a PE=1 SV=1	0.001	12	2	3	2	282	31.1	58	3	2	0	0.938	0.96623	22.87	1.547	0.812	0.938
High	Master Protein	H3BJN3	Protein CASP OS=Mus musculus GN=Cux1 PE=1 SV=1	0	20	9	21	2	678	77.4	339	21	9	0	1.23	0.975388	23.71	1.546	1.23	1.033
High	Master Protein	Q8BIJ7	RUN and FYVE domain-containing protein 1 OS=Mus musculus GN=Rufy1 PE=1 SV=1	0	11	6	28	5	712	80.3	464	28	6	0	1.545	0.0862798	11.45	1.545	1.913	1.426
High	Master Protein	A2AVJ7	Ribosome-binding protein 1 OS=Mus musculus GN=Rrbp1 PE=1 SV=1	0	20	20	68	20	1464	158.3	1094	68	20	0	1.321	0.378825	25.09	1.545	1.321	0.869
High	Master Protein	Q9Z2D3	Non-syndromic hearing impairment protein 5 homolog OS=Mus musculus GN=Dfna5 PE=1 SV=1	0	12	4	14	4	512	56.6	84	14	4	0	1.437	0.598859	11.09	1.545	1.437	1.131
High	Master Protein	Q8CGP0	Histone H2B type 3-B OS=Mus musculus GN=Hist3h2bb PE=1 SV=3	0	73	12	4469	2	126	13.9	160109	4469	12	3	0.927	0.894632	16.28	1.542	0.835	0.927
High	Master Protein	Q80V26	Inositol monophosphatase 3 OS=Mus musculus GN=Impad1 PE=1 SV=1	0	25	6	22	6	356	38.6	234	22	6	0	1.062	0.985705	5.21	1.54	1.062	1.025
High	Master Protein	Q6ZWQ7	Signal peptidase complex subunit 3 OS=Mus musculus GN=Spcs3 PE=1 SV=1	0	11	2	6	2	180	20.3	67	6	2	0	1.005	0.993902	1.62	1.538	1.005	0.994
High	Master Protein	P58710	L-gulonolactone oxidase OS=Mus musculus GN=Gulo PE=1 SV=3	0	19	7	15	7	440	50.4	245	15	7	0	1.24	0.652862	35.31	1.536	0.802	1.24
High	Master Protein	Q91VH6	Protein MEMO1 OS=Mus musculus GN=Memo1 PE=1 SV=1	0	61	11	105	11	297	33.7	2341	105	11	0	1.474	0.108231	6.15	1.535	1.166	1.474
High	Master Protein	Q8BUU7	N-acetylgalactosamine kinase OS=Mus musculus GN=Galk2 PE=1 SV=1	0	24	7	27	7	447	49.3	555	27	7	0	1.535	0.0424954	13.76	1.535	1.827	1.393
High	Master Protein	E9PW07	Voltage-dependent calcium channel beta subunit-associated regulatory protein OS=Mus musculus GN=Cbarp PE=1 SV=2	0	13	6	30	6	705	75	273	30	6	0	1.525	0.228832	0.79	1.533	1.377	1.525
High	Master Protein	P17047	Lysosome-associated membrane glycoprotein 2 OS=Mus musculus GN=Lamp2 PE=1 SV=2	0	14	6	31	6	415	45.7	546	31	6	0	0.98	0.952595	10.48	1.53	0.916	0.98
High	Master Protein	Q8BTZ7	Mannose-1-phosphate guanyltransferase beta OS=Mus musculus GN=Gmppb PE=1 SV=1	0	15	4	13	4	360	39.9	225	13	4	0	1.227	0.831493	13.79	1.529	1.113	1.227
High	Master Protein	Q8R151	NFX1-type zinc finger-containing protein 1 OS=Mus musculus GN=Znfx1 PE=1 SV=3	0	9	10	31	10	1909	218.7	223	31	10	0	1.173	0.913711	4.58	1.528	1.173	1.137
High	Master Protein	Q8BYB9	Protein O-glucosyltransferase 1 OS=Mus musculus GN=Poglut1 PE=1 SV=2	0	5	2	10	2	392	46.4	91	10	2	0	1.527	0.561473	10.6	1.527	1.201	1.636
High	Master Protein	E0CZE8	Bax inhibitor 1 (Fragment) OS=Mus musculus GN=Tmbim6 PE=1 SV=1	0.004	25	1	6	1	32	3.8	87	6	1	0	1.242	0.775539	30.75	1.527	1.242	0.984
High	Master Protein	Q923G2	DNA-directed RNA polymerases I, II, and III subunit RPABC3 OS=Mus musculus GN=Polr2h PE=1 SV=3	0	27	3	16	3	150	17.1	219	16	3	0	1.31	0.413955	13.86	1.527	1.31	1.187
High	Master Protein	Q08376	Zinc finger and BTB domain-containing protein 14 OS=Mus musculus GN=Zbtb14 PE=2 SV=1	0	9	3	20	3	449	50.9	134	20	3	0	1.146	0.982867	10.76	1.526	1.146	1.063
High	Master Protein	Q9JMC8	Band 4.1-like protein 4B OS=Mus musculus GN=Epb41l4b PE=1 SV=2	0	9	4	31	1	527	59.5	462	31	4	0	1.268	0.941051	30.02	1.525	0.927	1.268
High	Master Protein	Q99KU0	Vacuole membrane protein 1 OS=Mus musculus GN=Vmp1 PE=1 SV=2	0	16	3	32	3	406	45.9	899	32	3	0	1.249	0.615737	32.57	1.524	1.249	0.543
High	Master Protein	Q61140	Breast cancer anti-estrogen resistance protein 1 OS=Mus musculus GN=Bcar1 PE=1 SV=2	0	14	6	34	6	874	94.2	206	34	6	0	1.285	0.824196	27.5	1.524	0.989	1.285
High	Master Protein	Q9D8S4	Oligoribonuclease, mitochondrial OS=Mus musculus GN=Rexo2 PE=1 SV=2	0	14	3	7	3	237	26.7	133	7	3	0	1.522	0.291261	4.85	1.522	0.828	1.572
High	Master Protein	Q91WM3	U3 small nucleolar RNA-interacting protein 2 OS=Mus musculus GN=Rrp9 PE=1 SV=1	0	21	4	21	4	475	52.1	341	21	4	0	1.28	0.749518	3.96	1.521	1.28	1.246
High	Master Protein	Q9QYB1	Chloride intracellular channel protein 4 OS=Mus musculus GN=Clic4 PE=1 SV=3	0	36	5	48	5	253	28.7	355	48	5	0	1.486	0.0711008	3.32	1.52	1.296	1.486
High	Master Protein	Q60989	E3 ubiquitin-protein ligase XIAP OS=Mus musculus GN=Xiap PE=1 SV=2	0	18	5	8	5	496	56	111	8	5	0	0.819	0.809886	57.59	1.519	0.59	0.819
High	Master Protein	Q3UIU2	NADH dehydrogenase [ubiquinone] 1 beta subcomplex subunit 6 OS=Mus musculus GN=Ndufb6 PE=1 SV=3	0	74	10	132	10	128	15.5	1229	132	10	0	1.398	0.153512	12.65	1.517	1.398	0.88
High	Master Protein	O89053	Coronin-1A OS=Mus musculus GN=Coro1a PE=1 SV=5	0	22	8	23	7	461	51	401	23	8	0	1.456	0.154505	3.19	1.516	1.424	1.456
High	Master Protein	Q3UQ44	Ras GTPase-activating-like protein IQGAP2 OS=Mus musculus GN=Iqgap2 PE=1 SV=2	0	11	11	26	11	1575	180.4	384	26	11	0	1.514	0.477294	15.97	1.514	0.649	1.677
High	Master Protein	E9QQ16	Germ cell-specific gene 1 protein OS=Mus musculus GN=Gsg1 PE=4 SV=1	0.001	4	1	4	1	324	36.1	98	4	1	0	1.302	0.933429	12.49	1.514	1.302	1.192
High	Master Protein	Q9D2M8	Ubiquitin-conjugating enzyme E2 variant 2 OS=Mus musculus GN=Ube2v2 PE=1 SV=4	0	46	5	57	3	145	16.4	1160	57	5	0	1.451	0.246628	6.3	1.513	1.258	1.451
High	Master Protein	Q60575	Kinesin-like protein KIF1B OS=Mus musculus GN=Kif1b PE=1 SV=2	0	17	25	142	14	1816	204	1832	142	25	0	1.403	0.183	11.59	1.513	1.403	1.229
High	Master Protein	Q9WTX5	S-phase kinase-associated protein 1 OS=Mus musculus GN=Skp1 PE=1 SV=3	0	72	10	226	10	163	18.7	3748	226	10	0	1.243	0.277106	19.45	1.511	1.08	1.243
High	Master Protein	P27612	Phospholipase A-2-activating protein OS=Mus musculus GN=Plaa PE=1 SV=4	0	20	10	38	10	794	87.2	814	38	10	0	1.058	0.993902	6.51	1.509	1.012	1.058
High	Master Protein	Q91VF2	Histamine N-methyltransferase OS=Mus musculus GN=Hnmt PE=1 SV=1	0	17	3	7	3	295	33.6	71	7	3	0	1.438	0.37474	7.03	1.506	1.127	1.438
High	Master Protein	Q8R056	Prom1 protein OS=Mus musculus GN=Prom1 PE=1 SV=1	0	30	18	171	1	842	94.4	4388	171	18	0	1.22	0.895524	5.67	1.504	1.173	1.22
High	Master Protein	O08917	Flotillin-1 OS=Mus musculus GN=Flot1 PE=1 SV=1	0	28	9	79	9	428	47.5	1687	79	9	0	1.086	0.982578	10.23	1.504	1.011	1.086
High	Master Protein	Q9D176	Sushi domain-containing protein 3 OS=Mus musculus GN=Susd3 PE=2 SV=1	0	4	1	6	1	269	28.3	94	6	1	0	1.009	0.988026	0.72	1.503	1.004	1.009
High	Master Protein	P0C192	Leucine-rich repeat-containing protein 4B OS=Mus musculus GN=Lrrc4b PE=1 SV=1	0	20	11	40	9	709	76.1	230	40	11	2	1.145	0.887537	7.55	1.503	1.086	1.145
High	Master Protein	Q14CH7	Alanine--tRNA ligase, mitochondrial OS=Mus musculus GN=Aars2 PE=1 SV=1	0	10	6	13	6	980	106.7	229	13	6	0	1.502	0.648589	30.03	1.502	2.005	1.198
High	Master Protein	Q8QZV7	Integrator complex subunit 13 OS=Mus musculus GN=IntS13 PE=1 SV=2	0	13	6	32	6	732	82.7	351	32	6	0	1.173	0.913276	4.69	1.502	1.173	1.136
High	Master Protein	Q60766	Immunity-related GTPase family M protein 1 OS=Mus musculus GN=Irgm1 PE=1 SV=1	0	9	3	6	3	409	46.5	101	6	3	0	1.526	0.430059	2.35	1.502	1.526	1.602
High	Master Protein	Q925E0	Gamma-2-syntrophin OS=Mus musculus GN=Sntg2 PE=2 SV=1	0	7	3	7	3	539	59.6	58	7	3	0	1.223	0.858298	33.64	1.501	1.223	0.915
High	Master Protein	Q9R062	Glycogenin-1 OS=Mus musculus GN=Gyg1 PE=1 SV=3	0	22	6	41	6	333	37.4	828	41	6	0	1.283	0.504152	17.07	1.499	1.135	1.283
High	Master Protein	A0A0U1RPA0	Pleckstrin homology domain-containing family A member 7 (Fragment) OS=Mus musculus GN=Plekha7 PE=1 SV=1	0	19	16	67	1	1212	137.2	1127	67	16	16	1.226	0.73286	32.92	1.498	1.226	0.945
High	Master Protein	Q8R238	Serine dehydratase-like OS=Mus musculus GN=Sdsl PE=1 SV=1	0	19	3	7	3	329	34.7	113	7	3	0	1.498	0.607421	1.67	1.498	1.481	1.943
High	Master Protein	Q9JLV1	BAG family molecular chaperone regulator 3 OS=Mus musculus GN=Bag3 PE=1 SV=2	0	21	6	13	6	577	61.8	89	13	6	0	1.498	0.275429	39.11	1.498	1.943	1.103
High	Master Protein	A2ALU4	Protein Shroom2 OS=Mus musculus GN=Shroom2 PE=1 SV=1	0	12	13	56	13	1481	164.6	193	56	13	0	1.285	0.73286	24.53	1.498	0.898	1.285
High	Master Protein	Q3KNM2	E3 ubiquitin-protein ligase MARCH5 OS=Mus musculus GN=March5 PE=1 SV=1	0	40	8	42	8	278	31.2	926	42	8	0	0.741	0.0902972	1.35	1.496	0.734	0.741
High	Master Protein	Q9R1Q8	Transgelin-3 OS=Mus musculus GN=Tagln3 PE=1 SV=1	0	74	15	190	12	199	22.5	3236	190	15	3	0.923	0.751753	18.06	1.495	0.923	0.823
High	Master Protein	Q8K2M0	39S ribosomal protein L38, mitochondrial OS=Mus musculus GN=Mrpl38 PE=1 SV=2	0	14	4	7	4	380	45	57	7	4	0	1.495	0.648661	49.27	1.495	1.991	0.792
High	Master Protein	P61226	Ras-related protein Rap-2b OS=Mus musculus GN=Rap2b PE=1 SV=1	0	33	4	23	1	183	20.5	348	23	4	0	1.494	0.506857	3.66	1.494	1.137	1.531
High	Master Protein	P14206	40S ribosomal protein SA OS=Mus musculus GN=Rpsa PE=1 SV=4	0	62	14	293	14	295	32.8	4956	293	14	0	1.212	0.330144	21.35	1.493	1.037	1.212
High	Master Protein	Q8K0B2	Probable lysosomal cobalamin transporter OS=Mus musculus GN=Lmbrd1 PE=1 SV=1	0	4	2	6	2	537	61	117	6	2	0	0.95	0.974193	6.67	1.492	0.909	0.95
High	Master Protein	Q8CGA3	Large neutral amino acids transporter small subunit 4 OS=Mus musculus GN=Slc43a2 PE=1 SV=1	0	3	2	14	2	568	62.4	175	14	2	0	1.428	0.708826	6.58	1.492	1.144	1.428
High	Master Protein	Q925B0	PRKC apoptosis WT1 regulator protein OS=Mus musculus GN=Pawr PE=1 SV=2	0	40	7	34	7	333	35.9	858	34	7	0	1.488	0.0839968	16.11	1.488	1.65	1.225
High	Master Protein	Q501J7	Phosphatase and actin regulator 4 OS=Mus musculus GN=Phactr4 PE=1 SV=2	0	17	7	22	6	694	76.6	84	22	7	1	1.477	0.589391	0.96	1.487	1.477	1.369
High	Master Protein	D3Z0S1	Annexin (Fragment) OS=Mus musculus GN=Anxa4 PE=1 SV=1	0	15	3	31	3	254	28.5	566	31	3	0	1.484	0.123828	15.68	1.484	1.327	1.78
High	Master Protein	Q9CQQ8	U6 snRNA-associated Sm-like protein LSm7 OS=Mus musculus GN=Lsm7 PE=1 SV=1	0	41	3	10	3	103	11.6	156	10	3	0	0.909	0.836352	33.57	1.483	0.909	0.741
High	Master Protein	Q9ESC8	AF4/FMR2 family member 4 OS=Mus musculus GN=Aff4 PE=1 SV=1	0	6	5	14	4	1160	126.6	112	14	5	1	1.48	0.384046	2.16	1.48	1.501	0.752
High	Master Protein	Q5XKN4	Protein jagunal homolog 1 OS=Mus musculus GN=Jagn1 PE=1 SV=2	0	13	2	22	2	183	21.1	568	22	2	0	1.044	0.996172	4.45	1.476	1.044	1.013
High	Master Protein	P63028	Translationally-controlled tumor protein OS=Mus musculus GN=Tpt1 PE=1 SV=1	0	69	8	96	8	172	19.5	1344	96	8	0	1.474	0.106363	5.21	1.474	1.322	1.526
High	Master Protein	Q9JIQ3	Diablo homolog, mitochondrial OS=Mus musculus GN=Diablo PE=1 SV=2	0	19	4	22	4	237	26.8	642	22	4	0	1.281	0.509119	22.42	1.474	1.281	1.028
High	Master Protein	Q61133	Glutathione S-transferase theta-2 OS=Mus musculus GN=Gstt2 PE=1 SV=4	0	42	8	31	7	244	27.6	560	31	8	0	1.404	0.196925	7.45	1.474	1.188	1.404
High	Master Protein	A2AEY2	Four and a half LIM domains 1, isoform CRA_c OS=Mus musculus GN=Fhl1 PE=1 SV=1	0	44	12	146	1	323	36.2	3407	146	12	0	1.474	0.678607	7.01	1.474	1.274	1.543
High	Master Protein	Q3TKY6	Peptidyl-prolyl cis-trans isomerase CWC27 homolog OS=Mus musculus GN=Cwc27 PE=1 SV=1	0	23	7	14	7	469	53.5	61	14	7	0	1.473	0.0719984	12	1.473	1.592	0.828
High	Master Protein	Q99KW3	TRIO and F-actin-binding protein OS=Mus musculus GN=Triobp PE=1 SV=3	0	5	6	12	6	2014	223.2	144	12	6	0	1.133	0.954579	3.67	1.473	1.133	1.104
High	Master Protein	O88602	Voltage-dependent calcium channel gamma-2 subunit OS=Mus musculus GN=Cacng2 PE=1 SV=1	0	15	4	18	2	323	35.9	64	18	4	0	0.869	0.777782	0.34	1.471	0.869	0.867
High	Master Protein	E9Q9Q2	R3H domain-containing 1 OS=Mus musculus GN=R3hdm1 PE=1 SV=1	0	4	3	9	3	1135	124.3	75	9	3	0	1.467	0.147141	10.9	1.467	1.575	1.019
High	Master Protein	Q78PY7	Staphylococcal nuclease domain-containing protein 1 OS=Mus musculus GN=Snd1 PE=1 SV=1	0	55	33	161	33	910	102	1886	161	33	0	1.296	0.288922	19.36	1.466	1.296	0.951
High	Master Protein	Q91XF0	Pyridoxine-5'-phosphate oxidase OS=Mus musculus GN=Pnpo PE=1 SV=1	0	21	5	27	5	261	30.1	200	27	5	0	1.365	0.30861	10.91	1.465	0.832	1.365
High	Master Protein	A0A087WQI3	Kinectin OS=Mus musculus GN=Ktn1 PE=1 SV=1	0	53	51	540	0	1252	143.6	11354	540	51	1	0.749	0.722854	45.84	1.461	0.572	0.749
High	Master Protein	Q9D071	MMS19 nucleotide excision repair protein homolog OS=Mus musculus GN=Mms19 PE=1 SV=1	0	11	7	32	7	1031	113	801	32	7	0	1.3	0.6588	12.14	1.461	1.193	1.3
High	Master Protein	Q8C4Q6	Axin interactor, dorsalization-associated protein OS=Mus musculus GN=Aida PE=1 SV=1	0	14	3	15	3	305	34.9	398	15	3	0	1.407	0.692187	5.44	1.459	1.18	1.407
High	Master Protein	E9QJV4	Pre-mRNA-processing factor 39 OS=Mus musculus GN=Prpf39 PE=1 SV=1	0	8	4	21	4	665	77.9	249	21	4	0	1.456	0.438553	12.18	1.456	1.336	1.744
High	Master Protein	Q9CZH7	Matrix-remodeling-associated protein 7 OS=Mus musculus GN=Mxra7 PE=1 SV=2	0	70	7	35	3	178	19.4	566	35	7	4	1.455	0.02309	39.94	1.455	1.063	1.988
High	Master Protein	Q14AX6	Cyclin-dependent kinase 12 OS=Mus musculus GN=Cdk12 PE=1 SV=2	0	5	5	20	4	1484	163.6	256	20	5	0	1.166	0.956529	13.74	1.455	1.166	1.058
High	Master Protein	B5TVM2	Immunoglobulin-like domain-containing receptor 2 OS=Mus musculus GN=Ildr2 PE=1 SV=2	0	8	4	11	4	661	73.2	88	11	4	0	1.267	0.845139	21.78	1.454	1.004	1.267
High	Master Protein	Q9QUN9	Dickkopf-related protein 3 OS=Mus musculus GN=Dkk3 PE=2 SV=1	0	16	4	42	4	349	38.4	599	42	4	0	1.453	0.317392	21.41	1.453	0.758	1.663
High	Master Protein	A0A1L1ST61	HIG1 domain family member 1A, mitochondrial (Fragment) OS=Mus musculus GN=Higd1a PE=1 SV=1	0	36	2	51	2	76	8.2	1050	51	2	0	0.902	0.812007	7.01	1.453	0.861	0.902
High	Master Protein	D3Z2E3	RalBP1-associated Eps domain-containing protein 1 OS=Mus musculus GN=Reps1 PE=1 SV=1	0	18	8	57	8	705	76.8	533	57	8	0	1.106	0.97057	9.24	1.452	1.037	1.106
High	Master Protein	P56380	Bis(5'-nucleosyl)-tetraphosphatase [asymmetrical] OS=Mus musculus GN=Nudt2 PE=1 SV=3	0	29	3	28	3	147	17	328	28	3	0	1.236	0.708227	19.27	1.451	1.076	1.236
High	Master Protein	P19324	Serpin H1 OS=Mus musculus GN=Serpinh1 PE=1 SV=3	0	28	9	69	9	417	46.5	863	69	9	0	1.491	0.100365	0.51	1.45	1.497	1.491
High	Master Protein	P21956	Lactadherin OS=Mus musculus GN=Mfge8 PE=1 SV=3	0	30	11	81	11	463	51.2	1195	81	11	0	1.041	0.999177	10.02	1.449	0.97	1.041
High	Master Protein	Q6NWV3	Intraflagellar transport protein 122 homolog OS=Mus musculus GN=Ift122 PE=1 SV=1	0	8	5	7	5	1182	134.7	68	7	5	0	1.449	0.695381	17.69	1.449	1.621	0.858
High	Master Protein	Q80VJ2	Steroid receptor RNA activator 1 OS=Mus musculus GN=Sra1 PE=1 SV=3	0	31	4	15	4	232	25.5	163	15	4	0	1.217	0.864339	6.34	1.448	1.217	1.165
High	Master Protein	E9PZD8	Ceruloplasmin OS=Mus musculus GN=Cp PE=1 SV=1	0	56	48	858	48	1086	124.1	16594	858	48	0	1.264	0.195223	15.9	1.448	1.129	1.264
High	Master Protein	P47941	Crk-like protein OS=Mus musculus GN=Crkl PE=1 SV=2	0	42	9	39	9	303	33.8	481	39	9	0	1.237	0.618463	25.15	1.447	1.237	0.896
High	Master Protein	A0A0G2JDP0	HCLS1-associated protein X-1 OS=Mus musculus GN=Hax1 PE=1 SV=1	0	31	7	41	7	277	31.3	234	41	7	0	0.764	0.737643	3.29	1.446	0.747	0.764
High	Master Protein	Q91WU5	Arsenite methyltransferase OS=Mus musculus GN=As3mt PE=1 SV=2	0	37	11	54	11	376	41.8	878	54	11	0	1.306	0.524681	15.59	1.444	0.809	1.306
High	Master Protein	P21126	Ubiquitin-like protein 4A OS=Mus musculus GN=Ubl4a PE=1 SV=1	0	31	4	19	4	157	17.8	326	19	4	0	1.245	0.592991	23.42	1.442	1.033	1.245
High	Master Protein	G3UWX9	SMT3 suppressor of mif two 3 homolog 3 (Yeast), isoform CRA_b OS=Mus musculus GN=Sumo3 PE=1 SV=1	0	22	2	36	1	96	10.7	721	36	2	1	1.214	0.660404	20.79	1.441	1.043	1.214
High	Master Protein	Q8BUR4	Dedicator of cytokinesis protein 1 OS=Mus musculus GN=Dock1 PE=1 SV=3	0	6	9	31	8	1865	214.9	186	31	9	1	1.287	0.717197	10.58	1.441	1.287	1.195
High	Master Protein	P62307	Small nuclear ribonucleoprotein F OS=Mus musculus GN=Snrpf PE=1 SV=1	0.001	9	1	24	1	86	9.7	695	24	1	0	1.17	0.835938	34.25	1.441	1.17	0.774
High	Master Protein	Q99M51	Cytoplasmic protein NCK1 OS=Mus musculus GN=Nck1 PE=1 SV=1	0	24	4	19	4	377	42.9	148	19	4	0	1.001	0.993902	47.15	1.44	1.001	0.683
High	Master Protein	Q91W43	Glycine dehydrogenase (decarboxylating), mitochondrial OS=Mus musculus GN=Gldc PE=1 SV=1	0	34	20	138	20	1025	113.2	2330	138	20	0	1.44	0.0312489	0.03	1.44	1.29	1.44
High	Master Protein	P28271	Cytoplasmic aconitate hydratase OS=Mus musculus GN=Aco1 PE=1 SV=3	0	39	23	138	23	889	98.1	2475	138	23	0	1.437	0.120754	17.98	1.437	1.093	1.611
High	Master Protein	P51855	Glutathione synthetase OS=Mus musculus GN=Gss PE=1 SV=1	0	12	3	13	3	474	52.2	112	13	3	0	0.891	0.960995	56.09	1.434	0.891	0.645
High	Master Protein	D3YTR6	Protein spinster homolog 1 OS=Mus musculus GN=Spns1 PE=1 SV=1	0	5	2	13	2	476	51.4	204	13	2	0	1.433	0.728053	12.04	1.433	1.55	1.15
High	Master Protein	Q9CR95	Adaptin ear-binding coat-associated protein 1 OS=Mus musculus GN=Necap1 PE=1 SV=2	0	42	7	91	7	275	29.6	785	91	7	0	1.328	0.366378	11.74	1.433	0.967	1.328
High	Master Protein	O09174	Alpha-methylacyl-CoA racemase OS=Mus musculus GN=Amacr PE=1 SV=4	0	28	6	32	6	381	41.7	241	32	6	0	1.431	0.186943	10.08	1.431	1.333	1.862
High	Master Protein	O35668	Huntingtin-associated protein 1 OS=Mus musculus GN=Hap1 PE=1 SV=1	0	6	3	16	3	628	70.1	150	16	3	0	1.064	0.999996	50.21	1.424	1.064	0.614
High	Master Protein	Q8K010	5-oxoprolinase OS=Mus musculus GN=Oplah PE=1 SV=1	0	42	36	220	36	1288	137.5	3161	220	36	0	1.41	0.0517019	1.4	1.423	1.118	1.41
High	Master Protein	Q9WU84	Copper chaperone for superoxide dismutase OS=Mus musculus GN=Ccs PE=1 SV=1	0	16	2	13	2	274	28.9	170	13	2	0	1.234	0.89122	4.93	1.422	1.193	1.234
High	Master Protein	Q9WUM3	Coronin-1B OS=Mus musculus GN=Coro1b PE=1 SV=1	0	33	14	91	14	484	53.9	1108	91	14	0	1.536	0.0457096	0.21	1.422	1.536	1.539
High	Master Protein	Q9Z0R9	Fatty acid desaturase 2 OS=Mus musculus GN=Fads2 PE=1 SV=1	0	7	3	20	2	444	52.4	368	20	3	1	1.422	0.351779	1.32	1.422	1.092	1.434
High	Master Protein	Q7TN73	N-acetylneuraminate 9-O-acetyltransferase OS=Mus musculus GN=Casd1 PE=2 SV=1	0	8	4	9	4	797	91.5	67	9	4	0	0.93	0.913539	7.77	1.422	0.884	0.93
High	Master Protein	Q8BHZ0	Protein FAM49A OS=Mus musculus GN=Fam49a PE=1 SV=1	0	37	9	39	7	323	37.3	571	39	9	0	1.125	0.922213	33.73	1.42	0.869	1.125
High	Master Protein	Q64152	Transcription factor BTF3 OS=Mus musculus GN=Btf3 PE=1 SV=3	0	47	4	39	4	204	22	1531	39	4	0	1.119	0.924652	17.31	1.42	1.119	0.989
High	Master Protein	P28184	Metallothionein-3 OS=Mus musculus GN=Mt3 PE=1 SV=1	0	46	2	8	2	68	7	388	8	2	0	1.267	0.74681	17.52	1.417	0.671	1.267
High	Master Protein	A2AP78	High mobility group protein B3 (Fragment) OS=Mus musculus GN=Hmgb3 PE=1 SV=1	0	55	9	193	8	159	18.3	1954	193	9	0	1.416	0.0329952	55.17	1.416	1.943	0.709
High	Master Protein	P62071	Ras-related protein R-Ras2 OS=Mus musculus GN=Rras2 PE=1 SV=1	0	42	7	20	5	204	23.4	302	20	7	0	1.413	0.212692	0.29	1.416	1.413	1.136
High	Master Protein	Q8VCG9	Regulatory factor X-associated protein OS=Mus musculus GN=Rfxap PE=2 SV=2	0	12	2	6	2	231	24.8	161	6	2	0	0.811	0.868643	0.16	1.416	0.811	0.81
High	Master Protein	Q8C845	EF-hand domain-containing protein D2 OS=Mus musculus GN=Efhd2 PE=1 SV=1	0	43	11	80	11	240	26.8	1514	80	11	0	1.415	0.108111	23.46	1.415	1.009	1.639
High	Master Protein	P10518	Delta-aminolevulinic acid dehydratase OS=Mus musculus GN=Alad PE=1 SV=1	0	42	12	103	12	330	36	1966	103	12	0	0.912	0.786462	24	1.415	0.785	0.912
High	Master Protein	Q8C2E7	WASH complex subunit 5 OS=Mus musculus GN=Washc5 PE=1 SV=2	0	15	11	37	11	1159	134	290	37	11	0	1.415	0.226294	12.03	1.415	1.529	0.924
High	Master Protein	Q8C4W3	Neuritin-like protein OS=Mus musculus GN=Nrn1l PE=2 SV=2	0	12	1	15	1	162	17.4	350	15	1	0	1.037	0.999849	19.63	1.413	0.9	1.037
High	Master Protein	Q8BGS2	BolA-like protein 2 OS=Mus musculus GN=Bola2 PE=1 SV=1	0	65	4	21	4	86	10.2	360	21	4	0	1.411	0.186943	19.81	1.411	1.144	1.6
High	Master Protein	Q8BJ64	Choline dehydrogenase, mitochondrial OS=Mus musculus GN=Chdh PE=1 SV=1	0	20	8	48	8	596	66.4	453	48	8	0	1.413	0.147851	0.18	1.411	1.465	1.413
High	Master Protein	D3Z6Z0	Sorting nexin-3 OS=Mus musculus GN=Snx3 PE=1 SV=1	0	37	4	29	4	140	16.3	576	29	4	0	1.404	0.395176	0.73	1.411	1.404	1.356
High	Master Protein	Q9CRB6	Tubulin polymerization-promoting protein family member 3 OS=Mus musculus GN=Tppp3 PE=1 SV=1	0	50	8	76	8	176	19	494	76	8	0	1.41	0.157691	15.48	1.41	1.263	1.672
High	Master Protein	P53798	Squalene synthase OS=Mus musculus GN=Fdft1 PE=1 SV=2	0	9	3	11	3	416	48.1	206	11	3	0	1.41	0.720825	6.47	1.41	1.472	0.877
High	Master Protein	Q8VCX5	Calcium uptake protein 1, mitochondrial OS=Mus musculus GN=Micu1 PE=1 SV=1	0	17	8	39	8	477	54.3	412	39	8	0	1.231	0.660404	21.53	1.41	1.231	0.921
High	Master Protein	O08663	Methionine aminopeptidase 2 OS=Mus musculus GN=Metap2 PE=1 SV=1	0	36	14	74	14	478	52.9	808	74	14	0	1.408	0.192342	8.67	1.408	1.491	0.928
High	Master Protein	Q5SYD0	Unconventional myosin-Id OS=Mus musculus GN=Myo1d PE=1 SV=1	0	9	6	49	6	1006	116	338	49	6	0	1.059	0.993902	30.14	1.408	0.844	1.059
High	Master Protein	Q9DCM2	Glutathione S-transferase kappa 1 OS=Mus musculus GN=Gstk1 PE=1 SV=3	0	18	3	5	3	226	25.7	124	5	3	0	1.361	0.291477	5.12	1.408	1.361	0.78
High	Master Protein	Q8C166	Copine-1 OS=Mus musculus GN=Cpne1 PE=1 SV=1	0	16	5	12	5	536	58.8	148	12	5	0	1.407	0.667712	24.42	1.407	0.898	1.639
High	Master Protein	Q3U2P1	Protein transport protein Sec24A OS=Mus musculus GN=Sec24a PE=1 SV=1	0	10	8	27	8	1090	118.7	192	27	8	0	1.406	0.655978	19.25	1.406	1.991	1.224
High	Master Protein	O89086	RNA-binding protein 3 OS=Mus musculus GN=Rbm3 PE=1 SV=1	0	58	7	113	7	153	16.6	2299	113	7	0	1.242	0.410634	12.86	1.403	1.134	1.242
High	Master Protein	Q9DBG5	Perilipin-3 OS=Mus musculus GN=Plin3 PE=1 SV=1	0	35	10	55	10	437	47.2	1016	55	10	0	1.403	0.23991	6.77	1.403	1.334	1.467
High	Master Protein	Q9DAR7	m7GpppX diphosphatase OS=Mus musculus GN=Dcps PE=1 SV=1	0	45	13	173	13	338	39	4621	173	13	0	1.403	0.123268	8.92	1.403	1.114	1.487
High	Master Protein	Q9QZ08	N-acetyl-D-glucosamine kinase OS=Mus musculus GN=Nagk PE=1 SV=3	0	32	7	26	7	343	37.2	414	26	7	0	1.591	0.0316754	14.24	1.4	1.744	1.591
High	Master Protein	Q91WK2	Eukaryotic translation initiation factor 3 subunit H OS=Mus musculus GN=Eif3h PE=1 SV=1	0	35	9	120	9	352	39.8	4660	120	9	0	1.255	0.677026	17.05	1.4	1.255	1.078
High	Master Protein	E9Q7Q3	Tropomyosin alpha-3 chain OS=Mus musculus GN=Tpm3 PE=1 SV=1	0	39	13	108	4	248	28.7	1540	108	13	4	1.396	0.0787775	9.34	1.396	1.542	1.308
High	Master Protein	P62311	U6 snRNA-associated Sm-like protein LSm3 OS=Mus musculus GN=Lsm3 PE=1 SV=2	0	43	3	22	3	102	11.8	492	22	3	0	1.395	0.417872	27.77	1.395	1.657	0.9
High	Master Protein	Q91V09	WD repeat-containing protein 13 OS=Mus musculus GN=Wdr13 PE=1 SV=1	0	31	10	71	10	485	53.6	1366	71	10	0	1.083	0.977408	13.62	1.395	1.083	0.983
High	Master Protein	P06837	Neuromodulin OS=Mus musculus GN=Gap43 PE=1 SV=1	0	38	7	187	7	227	23.6	6539	187	7	0	1.169	0.789554	14.07	1.395	1.169	1.058
High	Master Protein	P35846	Folate receptor alpha OS=Mus musculus GN=Folr1 PE=1 SV=2	0	49	8	77	8	255	29.4	1280	77	8	0	1.312	0.347465	9.18	1.394	1.075	1.312
High	Master Protein	Q8K0C9	GDP-mannose 4,6 dehydratase OS=Mus musculus GN=Gmds PE=1 SV=1	0	13	3	5	3	372	42	52	5	3	0	1.032	0.999849	45.46	1.393	1.032	0.715
High	Master Protein	P61290	Proteasome activator complex subunit 3 OS=Mus musculus GN=Psme3 PE=1 SV=1	0	46	9	41	9	254	29.5	289	41	9	0	1.372	0.254066	2.16	1.392	0.974	1.372
High	Master Protein	Q8CF93	Polypeptide N-acetylgalactosaminyltransferase 13 OS=Mus musculus GN=Galnt13 PE=2 SV=1	0	5	2	5	2	556	63.9	81	5	2	0	1.391	0.7621	0.09	1.392	1.379	1.391
High	Master Protein	Q6PCM2	Integrator complex subunit 6 OS=Mus musculus GN=Ints6 PE=1 SV=1	0	3	2	8	2	883	99.6	84	8	2	0	1.391	0.762229	13.71	1.391	1.737	1.263
High	Master Protein	Q6KAR6	Exocyst complex component 3 OS=Mus musculus GN=Exoc3 PE=1 SV=2	0	13	6	25	6	755	86.4	406	25	6	0	1.165	0.91953	10.35	1.391	1.083	1.165
High	Master Protein	Q3TBU7	Arf-GAP domain and FG repeat-containing protein 2 (Fragment) OS=Mus musculus GN=Agfg2 PE=1 SV=1	0	11	4	15	3	406	41.7	349	15	4	0	1.136	0.961937	33.1	1.39	0.606	1.136
High	Master Protein	Q8JZK9	Hydroxymethylglutaryl-CoA synthase, cytoplasmic OS=Mus musculus GN=Hmgcs1 PE=1 SV=1	0	25	7	32	7	520	57.5	273	32	7	0	1.195	0.813336	24.01	1.389	0.909	1.195
High	Master Protein	Q5SYL3	Protein KIAA0100 OS=Mus musculus GN=Kiaa0100 PE=1 SV=1	0	2	3	6	3	2234	254.3	67	6	3	0	1.107	0.978526	36.94	1.388	0.831	1.107
High	Master Protein	Q91W97	Putative hexokinase HKDC1 OS=Mus musculus GN=Hkdc1 PE=2 SV=1	0	20	19	162	13	915	102.2	1506	162	19	0	1.392	0.241082	0.4	1.388	1.589	1.392
High	Master Protein	A2ADY9	Protein DDI1 homolog 2 OS=Mus musculus GN=Ddi2 PE=1 SV=1	0	36	8	41	8	399	44.6	522	41	8	0	1.319	0.356495	7.81	1.388	1.158	1.319
High	Master Protein	P70460	Vasodilator-stimulated phosphoprotein OS=Mus musculus GN=Vasp PE=1 SV=4	0	19	4	6	4	375	39.6	121	6	4	0	0.966	0.967561	13.31	1.388	0.966	0.887
High	Master Protein	Q5F2E7	Nuclear fragile X mental retardation-interacting protein 2 OS=Mus musculus GN=Nufip2 PE=1 SV=1	0	33	13	48	13	692	75.6	279	48	13	0	1.016	0.996172	0.86	1.388	1.016	1.01
High	Master Protein	Q8BGT1	Leucine-rich repeat transmembrane protein FLRT3 OS=Mus musculus GN=Flrt3 PE=1 SV=1	0	13	5	16	5	649	72.8	83	16	5	0	1.387	0.541902	23.76	1.387	1.61	0.923
High	Master Protein	Q8BJU0	Small glutamine-rich tetratricopeptide repeat-containing protein alpha OS=Mus musculus GN=Sgta PE=1 SV=2	0	30	8	85	1	315	34.3	2017	85	8	7	1.232	0.720825	18.66	1.387	1.002	1.232
High	Master Protein	Q8JZR2	Adapter molecule crk OS=Mus musculus GN=Crk PE=1 SV=1	0	85	12	101	1	204	22.9	1843	101	12	0	1.386	0.519542	15.68	1.386	1.533	1.235
High	Master Protein	A2AJ72	Far upstream element (FUSE)-binding protein 3 OS=Mus musculus GN=Fubp3 PE=1 SV=1	0	27	10	60	10	569	61.4	1083	60	10	0	1.124	0.963193	25.66	1.386	0.929	1.124
High	Master Protein	P62245	40S ribosomal protein S15a OS=Mus musculus GN=Rps15a PE=1 SV=2	0	61	9	218	9	130	14.8	5063	218	9	0	1.385	0.0748094	23.95	1.385	1.949	1.161
High	Master Protein	Q8CIB5	Fermitin family homolog 2 OS=Mus musculus GN=Fermt2 PE=1 SV=1	0	20	8	36	8	680	77.8	474	36	8	0	1.074	0.984017	2.28	1.385	1.074	1.057
High	Master Protein	O88643	Serine/threonine-protein kinase PAK 1 OS=Mus musculus GN=Pak1 PE=1 SV=1	0	23	8	42	2	545	60.7	544	42	8	0	1.372	0.79226	1.39	1.385	1.283	1.372
High	Master Protein	P24270	Catalase OS=Mus musculus GN=Cat PE=1 SV=4	0	31	12	75	12	527	59.8	948	75	12	0	1.356	0.313631	3.09	1.385	0.774	1.356
High	Master Protein	Q8C288	Phospholipid-transporting ATPase OS=Mus musculus GN=Atp9a PE=1 SV=1	0	15	10	27	8	1031	116.8	465	27	10	2	1.312	0.403129	8.2	1.385	1.312	1.052
High	Master Protein	Q9R0H0	Peroxisomal acyl-coenzyme A oxidase 1 OS=Mus musculus GN=Acox1 PE=1 SV=5	0	29	16	58	5	661	74.6	806	58	16	11	1.275	0.494818	12.75	1.385	0.976	1.275
High	Master Protein	D3YZN4	Paraplegin OS=Mus musculus GN=Spg7 PE=1 SV=1	0	15	5	12	5	676	75	180	12	5	0	1.228	0.822256	18.82	1.384	1.228	0.906
High	Master Protein	P70295	Ancient ubiquitous protein 1 OS=Mus musculus GN=Aup1 PE=1 SV=1	0	18	5	16	5	410	46.1	138	16	5	0	1.384	0.236429	3	1.384	1.412	1.087
High	Master Protein	Q61334	B-cell receptor-associated protein 29 OS=Mus musculus GN=Bcap29 PE=1 SV=1	0	21	5	29	5	240	27.9	174	29	5	0	1.383	0.373564	21.81	1.383	1.587	0.75
High	Master Protein	A2A9M4	Dedicator of cytokinesis protein 7 OS=Mus musculus GN=Dock7 PE=1 SV=2	0	16	20	46	20	2130	241.3	503	46	20	0	1.329	0.338244	6.07	1.383	1.141	1.329
High	Master Protein	Q63844	Mitogen-activated protein kinase 3 OS=Mus musculus GN=Mapk3 PE=1 SV=5	0	70	20	302	13	380	43	4343	302	20	0	1.383	0.270232	2.98	1.383	1.242	1.411
High	Master Protein	P49817	Caveolin-1 OS=Mus musculus GN=Cav1 PE=1 SV=1	0	41	7	74	7	178	20.5	1729	74	7	0	1.382	0.221741	23.84	1.382	1.856	1.16
High	Master Protein	P10833	Ras-related protein R-Ras OS=Mus musculus GN=Rras PE=1 SV=1	0	53	9	95	7	218	23.7	1401	95	9	2	1.236	0.727295	1.37	1.382	1.224	1.236
High	Master Protein	Q9R1P1	Proteasome subunit beta type-3 OS=Mus musculus GN=Psmb3 PE=1 SV=1	0	47	8	163	8	205	22.9	2885	163	8	0	1.382	0.136122	11.15	1.382	1.695	1.278
High	Master Protein	Q3UE92	X-prolyl aminopeptidase (Aminopeptidase P) 1, soluble, isoform CRA_b OS=Mus musculus GN=Xpnpep1 PE=1 SV=1	0	34	13	51	13	666	74.5	671	51	13	0	1.303	0.442654	8.91	1.382	0.913	1.303
High	Master Protein	P70336	Rho-associated protein kinase 2 OS=Mus musculus GN=Rock2 PE=1 SV=1	0	24	26	65	21	1388	160.5	711	65	26	5	1.367	0.248344	1.51	1.381	1.061	1.367
High	Master Protein	Q6GQS1	Calcium-binding mitochondrial carrier protein SCaMC-3 OS=Mus musculus GN=Slc25a23 PE=1 SV=1	0	22	9	17	8	467	52.5	137	17	9	0	0.684	0.160171	16.83	1.381	0.614	0.684
High	Master Protein	P70699	Lysosomal alpha-glucosidase OS=Mus musculus GN=Gaa PE=1 SV=2	0	15	8	22	8	953	106.2	351	22	8	0	1.333	0.406138	5.39	1.381	1.044	1.333
High	Master Protein	P26516	26S proteasome non-ATPase regulatory subunit 7 OS=Mus musculus GN=Psmd7 PE=1 SV=2	0	70	13	151	13	321	36.5	3415	151	13	0	1.138	0.897462	6.32	1.38	1.089	1.138
High	Master Protein	Q9WTL7	Acyl-protein thioesterase 2 OS=Mus musculus GN=Lypla2 PE=1 SV=1	0	55	9	89	9	231	24.8	1580	89	9	0	1.379	0.230868	25.36	1.379	1.097	1.615
High	Master Protein	Q9Z160	Conserved oligomeric Golgi complex subunit 1 OS=Mus musculus GN=Cog1 PE=1 SV=3	0	9	6	19	6	980	109	295	19	6	0	1.378	0.47047	0.03	1.378	1.379	1.139
High	Master Protein	Q8VBV3	Exosome complex component RRP4 OS=Mus musculus GN=Exosc2 PE=1 SV=1	0	15	3	20	3	293	32.6	367	20	3	0	1.36	0.688028	1.99	1.378	1.36	1.21
High	Master Protein	Q5SWZ5	Myosin phosphatase Rho-interacting protein OS=Mus musculus GN=Mprip PE=1 SV=1	0	10	16	60	16	2269	257.1	800	60	16	0	1.283	0.509944	10.94	1.377	1.283	1.086
High	Master Protein	Q9JI46	Diphosphoinositol polyphosphate phosphohydrolase 1 OS=Mus musculus GN=Nudt3 PE=1 SV=1	0	32	5	18	5	168	19	161	18	5	0	1.205	0.867368	15.31	1.374	1.205	1.081
High	Master Protein	P38060	Hydroxymethylglutaryl-CoA lyase, mitochondrial OS=Mus musculus GN=Hmgcl PE=1 SV=2	0	42	10	41	10	325	34.2	1192	41	10	0	1.371	0.26128	12.99	1.371	1.098	1.492
High	Master Protein	Q05CL8	La-related protein 7 OS=Mus musculus GN=Larp7 PE=1 SV=2	0	25	11	67	11	570	64.8	1561	67	11	0	1.019	0.993902	15.49	1.37	1.019	0.913
High	Master Protein	Q8BH95	Enoyl-CoA hydratase, mitochondrial OS=Mus musculus GN=Echs1 PE=1 SV=1	0	47	10	134	10	290	31.5	2524	134	10	0	1.168	0.731879	12.71	1.37	1.068	1.168
High	Master Protein	Q6PB44	Tyrosine-protein phosphatase non-receptor type 23 OS=Mus musculus GN=Ptpn23 PE=1 SV=2	0	15	18	55	18	1692	185.1	949	55	18	0	1.167	0.838771	5.22	1.369	1.125	1.167
High	Master Protein	Q9D8N0	Elongation factor 1-gamma OS=Mus musculus GN=Eef1g PE=1 SV=3	0	49	19	396	19	437	50	9839	396	19	0	1.169	0.559166	24.74	1.369	0.974	1.169
High	Master Protein	P35821	Tyrosine-protein phosphatase non-receptor type 1 OS=Mus musculus GN=Ptpn1 PE=1 SV=2	0	23	7	27	7	432	49.6	286	27	7	0	1.156	0.930899	16.41	1.368	1.156	1.028
High	Master Protein	P97772	Metabotropic glutamate receptor 1 OS=Mus musculus GN=Grm1 PE=1 SV=2	0	5	4	10	4	1199	133.1	96	10	4	0	1.057	0.999996	25.75	1.368	1.057	0.873
High	Master Protein	Q8R3C7	DEAD (Asp-Glu-Ala-Asp) box polypeptide 19b OS=Mus musculus GN=Ddx19b PE=1 SV=1	0	32	14	65	1	479	53.9	818	65	14	0	1.295	0.891949	8.3	1.368	1.295	0.684
High	Master Protein	O08997	Copper transport protein ATOX1 OS=Mus musculus GN=Atox1 PE=1 SV=1	0	59	4	33	4	68	7.3	603	33	4	0	1.368	0.266186	21.37	1.368	1.171	1.572
High	Master Protein	Q9WTP9	Ventral anterior homeobox 2 OS=Mus musculus GN=Vax2 PE=1 SV=1	0	27	5	21	5	292	31.7	382	21	5	0	1.285	0.524129	9.49	1.367	1.285	0.924
High	Master Protein	Q3TMH2	Secernin-3 OS=Mus musculus GN=Scrn3 PE=1 SV=1	0	39	11	35	11	418	47.6	301	35	11	0	1.161	0.895299	0.96	1.367	1.154	1.161
High	Master Protein	H7BWY8	Pre-rRNA-processing protein TSR2 homolog OS=Mus musculus GN=Tsr2 PE=1 SV=1	0	26	3	20	3	195	21.4	379	20	3	0	1.263	0.527861	12.13	1.367	1.263	0.99
High	Master Protein	Q6WKZ8	E3 ubiquitin-protein ligase UBR2 OS=Mus musculus GN=Ubr2 PE=1 SV=2	0	7	10	15	10	1755	199	157	15	10	0	1.094	0.978714	36.88	1.366	0.741	1.094
High	Master Protein	P50586	Tubby protein OS=Mus musculus GN=Tub PE=1 SV=1	0	33	11	45	9	505	55.3	867	45	11	1	1.366	0.270352	3.64	1.366	1.4	0.752
High	Master Protein	Q8CBB7	AP-1 complex subunit gamma-1 OS=Mus musculus GN=Ap1g1 PE=1 SV=1	0	26	17	117	17	825	91.7	1865	117	17	0	1.366	0.170414	9.99	1.366	1.458	1.232
High	Master Protein	Q6ZQL4	WD repeat-containing protein 43 OS=Mus musculus GN=Wdr43 PE=2 SV=2	0	11	4	17	4	677	75.3	106	17	4	0	1.223	0.937338	13.64	1.366	1.11	1.223
High	Master Protein	Q9DBG7	Signal recognition particle receptor subunit alpha OS=Mus musculus GN=Srpra PE=1 SV=1	0	24	11	27	11	636	69.6	220	27	11	0	1.188	0.771647	22.21	1.366	1.188	0.991
High	Master Protein	Q8JZQ9	Eukaryotic translation initiation factor 3 subunit B OS=Mus musculus GN=Eif3b PE=1 SV=1	0	32	17	81	17	803	91.3	1669	81	17	0	1.071	0.988622	16.05	1.365	0.955	1.071
High	Master Protein	O08784	Treacle protein OS=Mus musculus GN=Tcof1 PE=1 SV=1	0	22	19	133	19	1320	134.9	2759	133	19	0	1.343	0.323153	2.46	1.365	1.343	0.9
High	Master Protein	Q9WU28	Prefoldin subunit 5 OS=Mus musculus GN=Pfdn5 PE=1 SV=1	0	60	6	34	6	154	17.3	447	34	6	0	0.878	0.737802	16.05	1.365	0.878	0.793
High	Master Protein	P62317	Small nuclear ribonucleoprotein Sm D2 OS=Mus musculus GN=Snrpd2 PE=1 SV=1	0	71	10	187	10	118	13.5	4808	187	10	0	1.197	0.573754	20.79	1.365	1.197	0.765
High	Master Protein	O88531	Palmitoyl-protein thioesterase 1 OS=Mus musculus GN=Ppt1 PE=1 SV=2	0	45	12	92	12	306	34.5	1298	92	12	0	1.157	0.894632	19.12	1.364	1.008	1.157
High	Master Protein	A0A140LJ06	Homer protein homolog 2 OS=Mus musculus GN=Homer2 PE=1 SV=1	0	16	3	19	1	252	28.1	276	19	3	0	1.546	0.734187	17.49	1.364	1.546	1.756
High	Master Protein	Q62446	Peptidyl-prolyl cis-trans isomerase FKBP3 OS=Mus musculus GN=Fkbp3 PE=1 SV=2	0	38	6	137	6	224	25.1	2190	137	6	0	1.266	0.61989	11.25	1.363	1.266	0.832
High	Master Protein	Q9CQI6	Coactosin-like protein OS=Mus musculus GN=Cotl1 PE=1 SV=3	0	73	9	178	9	142	15.9	2971	178	9	0	1.362	0.198988	15.63	1.362	1.219	1.666
High	Master Protein	P62301	40S ribosomal protein S13 OS=Mus musculus GN=Rps13 PE=1 SV=2	0	54	11	159	11	151	17.2	2890	159	11	0	1.155	0.665414	26.5	1.362	1.155	0.923
High	Master Protein	P54822	Adenylosuccinate lyase OS=Mus musculus GN=Adsl PE=1 SV=2	0	57	19	199	19	484	54.8	4296	199	19	0	1.298	0.412007	1.08	1.361	1.298	1.288
High	Master Protein	F6QL70	60S ribosomal protein L29 OS=Mus musculus GN=Gm17669 PE=3 SV=1	0	30	5	82	5	154	17	1012	82	5	0	1.361	0.103305	26.7	1.361	1.606	1.001
High	Master Protein	Q9CQJ6	Density-regulated protein OS=Mus musculus GN=Denr PE=1 SV=1	0	35	4	28	4	198	22.2	926	28	4	0	1.36	0.529668	9.67	1.36	1.469	1.272
High	Master Protein	Q9JII6	Alcohol dehydrogenase [NADP(+)] OS=Mus musculus GN=Akr1a1 PE=1 SV=3	0	62	15	92	15	325	36.6	1267	92	15	0	1.36	0.228197	5.01	1.36	1.314	1.825
High	Master Protein	Q14B01	Ring finger protein 113A2 OS=Mus musculus GN=Rnf113a2 PE=1 SV=1	0	37	10	73	6	337	38	719	73	10	4	1.334	0.43365	2.77	1.359	1.334	1.062
High	Master Protein	S4R1X1	WD repeat-containing protein 91 OS=Mus musculus GN=Wdr91 PE=1 SV=1	0	19	6	22	6	604	67.7	452	22	6	0	0.895	0.823858	3.05	1.358	0.877	0.895
High	Master Protein	Q9JMH6	Thioredoxin reductase 1, cytoplasmic OS=Mus musculus GN=Txnrd1 PE=1 SV=3	0	37	12	69	12	613	67	1143	69	12	0	1.357	0.378961	11.81	1.357	1.039	1.465
High	Master Protein	Q8K0S2	Glutamate-rich protein 5 OS=Mus musculus GN=Erich5 PE=1 SV=1	0	60	15	99	15	362	38.5	1295	99	15	0	1.535	0.0689029	17.21	1.357	1.836	1.535
High	Master Protein	A2AAY5	SH3 and PX domain-containing protein 2B OS=Mus musculus GN=Sh3pxd2b PE=1 SV=1	0	4	2	12	2	908	101.5	200	12	2	0	1.356	0.809945	9.29	1.356	1.148	1.441
High	Master Protein	Q60631	Growth factor receptor-bound protein 2 OS=Mus musculus GN=Grb2 PE=1 SV=1	0	74	13	125	13	217	25.2	2040	125	13	0	1.073	0.990989	11.65	1.356	0.989	1.073
High	Master Protein	Q9D706	RNA polymerase II-associated protein 3 OS=Mus musculus GN=Rpap3 PE=1 SV=1	0	17	9	30	9	660	74.1	254	30	9	0	1.335	0.406201	2.26	1.356	1.335	0.972
High	Master Protein	P17809	Solute carrier family 2, facilitated glucose transporter member 1 OS=Mus musculus GN=Slc2a1 PE=1 SV=4	0	17	11	408	11	492	53.9	3846	408	11	0	0.926	0.892893	29.13	1.356	0.926	0.774
High	Master Protein	E9PV44	ATPase inhibitor, mitochondrial OS=Mus musculus GN=Atpif1 PE=1 SV=1	0	22	2	43	2	74	8.8	239	43	2	0	1.323	0.154264	3.61	1.355	1.323	1.099
High	Master Protein	Q9ER35	Fructosamine-3-kinase OS=Mus musculus GN=Fn3k PE=1 SV=1	0	38	10	46	10	309	35	1177	46	10	0	1.207	0.727968	13.67	1.355	1.207	1.095
High	Master Protein	B2RU90	PR domain containing 8 OS=Mus musculus GN=Prdm8 PE=1 SV=1	0	19	8	33	8	688	71.7	428	33	8	0	1.007	0.993902	42.08	1.354	1.007	0.721
High	Master Protein	Q9WUB3	Glycogen phosphorylase, muscle form OS=Mus musculus GN=Pygm PE=1 SV=3	0	68	61	1238	45	842	97.2	24555	1238	61	18	1.541	0.00136505	7.61	1.354	1.62	1.541
High	Master Protein	Q505F5	Leucine-rich repeat-containing protein 47 OS=Mus musculus GN=Lrrc47 PE=1 SV=1	0	24	12	58	12	581	63.6	910	58	12	0	1.21	0.717033	17.59	1.353	1.21	1.061
High	Master Protein	Q99KK7	Dipeptidyl peptidase 3 OS=Mus musculus GN=Dpp3 PE=1 SV=2	0	35	16	93	16	738	82.8	1846	93	16	0	1.353	0.324441	3.46	1.353	1.321	1.616
High	Master Protein	O08709	Peroxiredoxin-6 OS=Mus musculus GN=Prdx6 PE=1 SV=3	0	84	19	647	1	224	24.9	19002	647	19	20	1.424	0.0144635	7.48	1.352	1.424	1.895
High	Master Protein	Q3UKC1	Tax1-binding protein 1 homolog OS=Mus musculus GN=Tax1bp1 PE=1 SV=2	0	12	7	28	7	814	93.6	157	28	7	0	1.273	0.724592	5.02	1.351	1.23	1.273
High	Master Protein	G3X922	DnaJ heat shock protein family (Hsp40) member C13 OS=Mus musculus GN=Dnajc13 PE=1 SV=1	0	15	20	59	20	2243	254.3	750	59	20	0	1.351	0.321969	11.1	1.351	1.452	1.107
High	Master Protein	Q6PAM1	Alpha-taxilin OS=Mus musculus GN=Txlna PE=1 SV=1	0	6	2	16	2	554	62.3	307	16	2	0	1.097	0.993977	34.33	1.35	1.097	0.651
High	Master Protein	Q5U452	MCG14616 OS=Mus musculus GN=2810408M09Rik PE=1 SV=1	0	25	4	49	2	244	27.4	698	49	4	0	0.948	0.976653	44.16	1.35	0.713	0.948
High	Master Protein	P17918	Proliferating cell nuclear antigen OS=Mus musculus GN=Pcna PE=1 SV=2	0	47	7	32	7	261	28.8	418	32	7	0	1.35	0.279541	7.74	1.35	0.833	1.421
High	Master Protein	Q9D0K2	Succinyl-CoA:3-ketoacid coenzyme A transferase 1, mitochondrial OS=Mus musculus GN=Oxct1 PE=1 SV=1	0	52	17	234	17	520	56	5993	234	17	0	1.35	0.184299	0	1.35	1.35	1.772
High	Master Protein	Q11136	Xaa-Pro dipeptidase OS=Mus musculus GN=Pepd PE=1 SV=3	0	17	5	22	5	493	55	319	22	5	0	1.276	0.701344	8.51	1.349	0.894	1.276
High	Master Protein	Q80XN0	D-beta-hydroxybutyrate dehydrogenase, mitochondrial OS=Mus musculus GN=Bdh1 PE=1 SV=2	0	50	14	105	14	343	38.3	1970	105	14	0	1.146	0.78377	26.34	1.349	0.922	1.146
High	Master Protein	P61924	Coatomer subunit zeta-1 OS=Mus musculus GN=Copz1 PE=1 SV=1	0	40	5	48	5	177	20.2	1100	48	5	0	1.262	0.654292	10.29	1.349	1.262	1.014
High	Master Protein	Q9DC28	Casein kinase I isoform delta OS=Mus musculus GN=Csnk1d PE=1 SV=2	0	17	6	16	3	415	47.3	259	16	6	3	1.348	0.461172	20.59	1.348	1.536	0.812
High	Master Protein	O08529	Calpain-2 catalytic subunit OS=Mus musculus GN=Capn2 PE=1 SV=4	0	40	20	101	20	700	79.8	1733	101	20	0	1.595	0.0240843	3.47	1.348	1.632	1.595
High	Master Protein	Q80T69	Round spermatid basic protein 1 OS=Mus musculus GN=Rsbn1 PE=1 SV=3	0	15	8	31	7	795	89.2	319	31	8	0	1.347	0.530802	18.83	1.347	1.518	0.998
High	Master Protein	P63054	Calmodulin regulator protein PCP4 OS=Mus musculus GN=Pcp4 PE=3 SV=2	0	45	4	57	4	62	6.8	956	57	4	0	1.347	0.205092	55.2	1.347	0.846	1.874
High	Master Protein	Q543M9	MCG14605, isoform CRA_c OS=Mus musculus GN=Trp53rkb PE=1 SV=1	0	25	4	39	2	244	27.4	494	39	4	2	1.109	0.984017	27.56	1.347	1.109	0.902
High	Master Protein	Q3UN10	Wolframin OS=Mus musculus GN=Wfs1 PE=1 SV=1	0	18	11	53	11	814	91.8	784	53	11	0	1.346	0.375743	19.19	1.346	1.521	1.125
High	Master Protein	Q99MS8	Tubulin polyglutamylase complex subunit 1 OS=Mus musculus GN=Tpgs1 PE=1 SV=1	0	27	4	12	4	303	32.6	145	12	4	0	1.346	0.708227	17.37	1.346	1.188	1.622
High	Master Protein	Q61166	Microtubule-associated protein RP/EB family member 1 OS=Mus musculus GN=Mapre1 PE=1 SV=3	0	47	10	73	8	268	30	1096	73	10	0	1.255	0.62279	6.18	1.346	1.203	1.255
High	Master Protein	Q9EP71	Ankycorbin OS=Mus musculus GN=Rai14 PE=1 SV=1	0	7	5	16	5	979	108.8	335	16	5	0	1.253	0.913276	10.95	1.345	0.919	1.253
High	Master Protein	P18242	Cathepsin D OS=Mus musculus GN=Ctsd PE=1 SV=1	0	42	12	413	12	410	44.9	7841	413	12	0	1.345	0.0586686	1.76	1.345	1.042	1.361
High	Master Protein	P49442	Inositol polyphosphate 1-phosphatase OS=Mus musculus GN=Inpp1 PE=1 SV=2	0	31	8	35	8	396	43.3	533	35	8	0	1.345	0.331631	9.09	1.345	0.866	1.427
High	Master Protein	P59017	Bcl-2-like protein 13 OS=Mus musculus GN=Bcl2l13 PE=1 SV=2	0	44	9	65	9	434	46.7	1571	65	9	0	0.925	0.819271	10.72	1.344	0.862	0.925
High	Master Protein	A2AJI0	MAP7 domain-containing protein 1 OS=Mus musculus GN=Map7d1 PE=1 SV=1	0	28	16	64	16	846	93.2	968	64	16	0	1.323	0.377201	2.32	1.344	1.323	0.992
High	Master Protein	P17665	Cytochrome c oxidase subunit 7C, mitochondrial OS=Mus musculus GN=Cox7c PE=1 SV=1	0	29	2	13	2	63	7.3	160	13	2	0	1.343	0.415054	12.22	1.343	1.177	1.454
High	Master Protein	Q9CR98	Protein FAM136A OS=Mus musculus GN=Fam136a PE=1 SV=1	0	58	6	87	6	138	15.7	1510	87	6	0	1.342	0.38483	14.04	1.342	0.764	1.469
High	Master Protein	E9QMC1	Cingulin OS=Mus musculus GN=Cgn PE=1 SV=1	0	3	3	13	3	1192	136.5	246	13	3	0	1.394	0.794321	5.56	1.342	1.582	1.394
High	Master Protein	F6Z595	Zinc finger and BTB domain-containing 38 OS=Mus musculus GN=Zbtb38 PE=1 SV=1	0	12	8	27	8	924	102.4	301	27	8	0	1.01	0.997305	3.85	1.341	0.984	1.01
High	Master Protein	Q3TMX7	Sulfhydryl oxidase 2 OS=Mus musculus GN=Qsox2 PE=1 SV=1	0	6	3	6	3	692	77.7	139	6	3	0	1.532	0.597334	18.58	1.34	1.774	1.532
High	Master Protein	Q9D273	Cob(I)yrinic acid a,c-diamide adenosyltransferase, mitochondrial OS=Mus musculus GN=Mmab PE=1 SV=1	0	35	6	17	6	237	26.3	126	17	6	0	1.339	0.316288	27.52	1.339	1.006	1.588
High	Master Protein	Q9CY58	Plasminogen activator inhibitor 1 RNA-binding protein OS=Mus musculus GN=Serbp1 PE=1 SV=2	0	47	16	256	10	407	44.7	4694	256	16	6	1.109	0.897769	30.74	1.339	1.109	0.876
High	Master Protein	Q9ERI2	Ras-related protein Rab-27A OS=Mus musculus GN=Rab27a PE=1 SV=1	0	16	4	13	2	221	25	100	13	4	0	0.83	0.896866	56.37	1.339	0.596	0.83
High	Master Protein	P34914	Bifunctional epoxide hydrolase 2 OS=Mus musculus GN=Ephx2 PE=1 SV=2	0	58	19	170	19	554	62.5	2547	170	19	0	1.339	0.307685	19.92	1.339	1.159	1.593
High	Master Protein	Q99KN2	Probable cytosolic iron-sulfur protein assembly protein CIAO1 OS=Mus musculus GN=Ciao1 PE=1 SV=1	0	33	7	18	7	339	37.6	307	18	7	0	1.369	0.275739	3.29	1.338	1.552	1.369
High	Master Protein	Q5DTT2	PH and SEC7 domain-containing protein 1 OS=Mus musculus GN=Psd PE=1 SV=2	0	6	4	17	4	1024	109.6	209	17	4	0	1.338	0.628973	31.4	1.338	1.621	1.031
High	Master Protein	Q9CQM8	60S ribosomal protein L21 OS=Mus musculus GN=Rpl21 PE=1 SV=1	0	43	9	144	9	160	18.6	2375	144	9	0	1.24	0.397539	11.64	1.337	1.24	1.13
High	Master Protein	Q8BFV2	PCI domain-containing protein 2 OS=Mus musculus GN=Pcid2 PE=1 SV=1	0	11	3	27	3	399	46.1	452	27	3	0	1.337	0.796848	35.71	1.337	1.659	0.845
High	Master Protein	Q8BU04	Putative E3 ubiquitin-protein ligase UBR7 OS=Mus musculus GN=Ubr7 PE=1 SV=1	0	32	8	22	8	425	48	357	22	8	0	1.296	0.669897	4.59	1.336	1.129	1.296
High	Master Protein	P26039	Talin-1 OS=Mus musculus GN=Tln1 PE=1 SV=2	0	24	41	176	32	2541	269.7	3461	176	41	0	1.233	0.714826	1.76	1.336	1.219	1.233
High	Master Protein	Q8BUI3	Leucine-rich repeat and WD repeat-containing protein 1 OS=Mus musculus GN=LRWD1 PE=2 SV=1	0	14	5	8	5	648	71.5	76	8	5	0	0.976	0.988622	39.92	1.335	0.747	0.976
High	Master Protein	Q9D8X2	Coiled-coil domain-containing protein 124 OS=Mus musculus GN=Ccdc124 PE=1 SV=1	0	27	5	20	5	217	25.3	180	20	5	0	1.335	0.758135	5.31	1.335	1.383	0.82
High	Master Protein	Q9WVJ2	26S proteasome non-ATPase regulatory subunit 13 OS=Mus musculus GN=Psmd13 PE=1 SV=1	0	58	19	196	19	376	42.8	3763	196	19	0	1.217	0.548101	11.28	1.335	1.125	1.217
High	Master Protein	Q8BVG4	Dipeptidyl peptidase 9 OS=Mus musculus GN=Dpp9 PE=1 SV=2	0	12	8	34	8	862	97.9	312	34	8	0	1.118	0.930091	25.84	1.334	0.923	1.118
High	Master Protein	Q9R0P4	Small acidic protein OS=Mus musculus GN=Smap PE=1 SV=1	0	33	4	25	4	181	20	798	25	4	0	1.048	0.995237	22.79	1.334	1.048	0.887
High	Master Protein	P47809	Dual specificity mitogen-activated protein kinase kinase 4 OS=Mus musculus GN=Map2k4 PE=1 SV=2	0	34	9	36	9	397	44.1	1049	36	9	0	1.221	0.667548	13.79	1.334	0.97	1.221
High	Master Protein	Q61466	SWI/SNF-related matrix-associated actin-dependent regulator of chromatin subfamily D member 1 OS=Mus musculus GN=Smarcd1 PE=1 SV=3	0	28	10	47	8	515	58.2	1121	47	10	1	1.334	0.358757	1.86	1.334	1.351	1.078
High	Master Protein	P23116	Eukaryotic translation initiation factor 3 subunit A OS=Mus musculus GN=Eif3a PE=1 SV=5	0	38	47	326	47	1344	161.8	3637	326	47	0	1.187	0.59941	9.84	1.334	1.187	1.108
High	Master Protein	Q9QUR7	Peptidyl-prolyl cis-trans isomerase NIMA-interacting 1 OS=Mus musculus GN=Pin1 PE=1 SV=1	0	54	6	67	6	165	18.4	1473	67	6	0	1.334	0.391722	4.24	1.334	1.372	1.251
High	Master Protein	Q91XB7	Protein YIF1A OS=Mus musculus GN=Yif1a PE=1 SV=1	0	13	3	9	3	293	32.1	75	9	3	0	1.164	0.837144	10.2	1.334	1.084	1.164
High	Master Protein	Q8CCT4	Transcription elongation factor A protein-like 5 OS=Mus musculus GN=Tceal5 PE=1 SV=1	0	32	9	220	2	200	22	2499	220	9	10	1.296	0.211812	4.32	1.334	1.225	1.296
High	Master Protein	P47199	Quinone oxidoreductase OS=Mus musculus GN=Cryz PE=1 SV=1	0	52	12	104	12	331	35.2	2314	104	12	0	1.334	0.315227	23.18	1.334	1.125	1.725
High	Master Protein	P20152	Vimentin OS=Mus musculus GN=Vim PE=1 SV=3	0	86	52	4125	46	466	53.7	96379	4125	52	7	1.289	0.14026	5.14	1.333	1.186	1.289
High	Master Protein	O35098	Dihydropyrimidinase-related protein 4 OS=Mus musculus GN=Dpysl4 PE=1 SV=1	0	77	32	518	30	572	61.9	14236	518	32	0	1.333	0.0712902	15.67	1.333	0.971	1.474
High	Master Protein	Q9CQ49	Nuclear cap-binding protein subunit 2 OS=Mus musculus GN=Ncbp2 PE=1 SV=1	0	33	5	39	5	156	18	137	39	5	0	1.259	0.604925	8.71	1.333	1.259	1.007
High	Master Protein	O88587	Catechol O-methyltransferase OS=Mus musculus GN=Comt PE=1 SV=2	0	60	10	85	10	265	29.5	2183	85	10	0	1.339	0.202926	0.7	1.333	1.339	1.47
High	Master Protein	E9PYD1	Family with sequence similarity 98, member C OS=Mus musculus GN=Fam98c PE=1 SV=1	0	16	3	6	3	344	37.2	130	6	3	0	1.332	0.816924	38.87	1.332	1.681	0.739
High	Master Protein	P09671	Superoxide dismutase [Mn], mitochondrial OS=Mus musculus GN=Sod2 PE=1 SV=3	0	66	11	426	11	222	24.6	7376	426	11	0	1.331	0.0742786	13.73	1.331	1.208	1.841
High	Master Protein	A2AWS5	Histone deacetylase OS=Mus musculus GN=Hdac5 PE=1 SV=1	0	13	8	18	8	1030	111.4	71	18	8	0	1.33	0.841897	6.7	1.33	0.893	1.39
High	Master Protein	Q8C0L0	Thioredoxin-related transmembrane protein 4 OS=Mus musculus GN=Tmx4 PE=1 SV=2	0	21	5	64	5	335	37.1	1822	64	5	0	1.104	0.976963	7.88	1.329	1.104	1.046
High	Master Protein	Q8CGA0	Protein phosphatase 1F OS=Mus musculus GN=Ppm1f PE=1 SV=1	0	16	3	29	3	452	49.6	404	29	3	0	1.705	0.33213	18.09	1.329	1.705	1.913
High	Master Protein	F6RG68	F-BAR domain only protein 2 OS=Mus musculus GN=Fcho2 PE=1 SV=2	0	3	2	6	2	803	88.2	73	6	2	0	1.248	0.931388	9.49	1.328	1.248	1.159
High	Master Protein	Q8BFQ4	WD repeat-containing protein 82 OS=Mus musculus GN=Wdr82 PE=1 SV=1	0	50	9	54	9	313	35.1	1840	54	9	0	1.152	0.89849	22.6	1.327	1.152	0.863
High	Master Protein	P35585	AP-1 complex subunit mu-1 OS=Mus musculus GN=Ap1m1 PE=1 SV=3	0	53	18	112	18	423	48.5	1380	112	18	0	1.327	0.235217	8.51	1.327	1.083	1.403
High	Master Protein	P28867	Protein kinase C delta type OS=Mus musculus GN=Prkcd PE=1 SV=3	0	10	7	31	6	674	77.5	181	31	7	0	1.357	0.71707	3.31	1.327	1.624	1.357
High	Master Protein	Q9CZR8	Elongation factor Ts, mitochondrial OS=Mus musculus GN=Tsfm PE=1 SV=1	0	35	6	16	6	324	35.3	170	16	6	0	1.523	0.063657	19.08	1.327	1.523	1.763
High	Master Protein	P11679	Keratin, type II cytoskeletal 8 OS=Mus musculus GN=Krt8 PE=1 SV=4	0	33	20	208	11	490	54.5	2614	208	20	0	0.617	0.00221813	7.17	1.326	0.617	0.589
High	Master Protein	Q6PD10	Inositol hexakisphosphate kinase 1 OS=Mus musculus GN=Ip6k1 PE=2 SV=1	0	18	5	15	5	433	49.3	172	15	5	0	1.325	0.819442	11.69	1.325	1.221	1.512
High	Master Protein	P62334	26S proteasome regulatory subunit 10B OS=Mus musculus GN=Psmc6 PE=1 SV=1	0	53	17	114	17	389	44.1	1934	114	17	0	1.325	0.2861	8.39	1.325	1.25	1.459
High	Master Protein	K3W4L3	Prosaposin OS=Mus musculus GN=Psap PE=1 SV=1	0	27	13	172	13	556	61.3	4896	172	13	0	1.325	0.0817191	9.6	1.325	0.943	1.41
High	Master Protein	P61028	Ras-related protein Rab-8B OS=Mus musculus GN=Rab8b PE=1 SV=1	0	34	7	69	4	207	23.6	1445	69	7	0	1.258	0.559887	7.79	1.324	1.114	1.258
High	Master Protein	Q9Z2Q5	39S ribosomal protein L40, mitochondrial OS=Mus musculus GN=Mrpl40 PE=1 SV=2	0	19	3	12	3	206	24.3	101	12	3	0	1.379	0.581432	6.05	1.323	1.449	1.379
High	Master Protein	Q61165	Sodium/hydrogen exchanger 1 OS=Mus musculus GN=Slc9a1 PE=1 SV=1	0	10	5	23	5	820	91.4	319	23	5	0	1.293	0.470633	3.37	1.322	1.231	1.293
High	Master Protein	Q60790	Ras GTPase-activating protein 3 OS=Mus musculus GN=Rasa3 PE=1 SV=2	0	9	6	12	6	834	95.9	88	12	6	0	1.322	0.351527	15.41	1.322	1.459	0.993
High	Master Protein	Q8K409	DNA polymerase beta OS=Mus musculus GN=Polb PE=1 SV=3	0	14	3	11	3	335	38.3	201	11	3	0	0.957	0.959504	40.76	1.321	0.957	0.701
High	Master Protein	Q6W8Q3	Purkinje cell protein 4-like protein 1 OS=Mus musculus GN=Pcp4l1 PE=1 SV=1	0	49	2	42	2	68	7.5	659	42	2	0	1.32	0.333267	8.57	1.32	1.195	1.396
High	Master Protein	Q9CZN8	Glutamyl-tRNA(Gln) amidotransferase subunit A, mitochondrial OS=Mus musculus GN=Qrsl1 PE=1 SV=1	0.002	2	1	9	1	525	56.7	67	9	1	0	1.07	0.999996	5.39	1.319	1.07	1.031
High	Master Protein	E9PYG6	RAS p21 protein activator 1 OS=Mus musculus GN=Rasa1 PE=1 SV=1	0	13	9	31	9	1038	115.4	508	31	9	0	1.216	0.827483	12.55	1.319	1.068	1.216
High	Master Protein	P54728	UV excision repair protein RAD23 homolog B OS=Mus musculus GN=Rad23b PE=1 SV=2	0	26	9	75	7	416	43.5	1182	75	9	2	1.318	0.416067	22.03	1.318	1.123	1.746
High	Master Protein	Q9Z2V5	Histone deacetylase 6 OS=Mus musculus GN=Hdac6 PE=1 SV=3	0	21	13	77	13	1149	125.7	1504	77	13	0	1.204	0.763001	13.98	1.318	1.089	1.204
High	Master Protein	P55302	Alpha-2-macroglobulin receptor-associated protein OS=Mus musculus GN=Lrpap1 PE=1 SV=1	0	39	12	121	12	360	42.2	2058	121	12	0	1.291	0.434304	3.01	1.317	1.291	1.184
High	Master Protein	Q8CBE3	WD repeat-containing protein 37 OS=Mus musculus GN=Wdr37 PE=1 SV=1	0	56	16	113	16	496	55	2818	113	16	0	1.132	0.921545	16.78	1.317	1.004	1.132
High	Master Protein	Q9D8U8	Sorting nexin-5 OS=Mus musculus GN=Snx5 PE=1 SV=1	0	40	10	49	10	404	46.8	666	49	10	0	1.409	0.182571	9.71	1.316	1.586	1.409
High	Master Protein	O70310	Glycylpeptide N-tetradecanoyltransferase 1 OS=Mus musculus GN=Nmt1 PE=1 SV=1	0	35	14	99	11	496	56.9	2004	99	14	3	0.987	0.962787	20.74	1.316	0.987	0.866
High	Master Protein	J3QNK5	Histone deacetylase complex subunit SAP130 OS=Mus musculus GN=Sap130 PE=1 SV=1	0	6	4	17	4	1057	111.2	154	17	4	0	1.315	0.662499	48.72	1.315	0.883	1.863
High	Master Protein	P97742	Carnitine O-palmitoyltransferase 1, liver isoform OS=Mus musculus GN=Cpt1a PE=1 SV=4	0	29	21	194	21	773	88.2	2648	194	21	0	1.315	0.169992	1.87	1.315	1.332	1.089
High	Master Protein	Q8CI75	DIS3-like exonuclease 2 OS=Mus musculus GN=Dis3l2 PE=1 SV=1	0	9	4	11	4	870	97.7	62	11	4	0	1.315	0.874957	13.24	1.315	1.432	1.191
High	Master Protein	P63085	Mitogen-activated protein kinase 1 OS=Mus musculus GN=Mapk1 PE=1 SV=3	0	75	23	351	16	358	41.2	5715	351	23	8	1.156	0.757778	7.59	1.314	1.156	1.097
High	Master Protein	Q8BT60	Copine-3 OS=Mus musculus GN=Cpne3 PE=1 SV=2	0	16	8	40	7	533	59.5	635	40	8	0	1.319	0.43922	0.58	1.314	1.319	1.663
High	Master Protein	Q62470	Integrin alpha-3 OS=Mus musculus GN=Itga3 PE=1 SV=1	0	10	8	21	8	1053	116.7	274	21	8	0	1.314	0.475727	4.55	1.314	1.274	1.551
High	Master Protein	P59016	Vacuolar protein sorting-associated protein 33B OS=Mus musculus GN=Vps33b PE=1 SV=1	0	19	10	17	10	617	70.5	211	17	10	0	1.128	0.95823	17.87	1.314	1.128	0.992
High	Master Protein	P05063	Fructose-bisphosphate aldolase C OS=Mus musculus GN=Aldoc PE=1 SV=4	0	91	30	770	25	363	39.4	16282	770	30	0	1.312	0.0995942	43.52	1.312	0.887	1.697
High	Master Protein	Q9ESU6	Bromodomain-containing protein 4 OS=Mus musculus GN=Brd4 PE=1 SV=2	0	7	9	37	4	1400	155.8	411	37	9	1	0.888	0.89122	26.26	1.312	0.888	0.755
High	Master Protein	P62746	Rho-related GTP-binding protein RhoB OS=Mus musculus GN=Rhob PE=1 SV=1	0	65	10	80	8	196	22.1	1183	80	10	0	1.312	0.4019	8.34	1.312	1.385	1.169
High	Master Protein	Q8CGC6	RNA-binding protein 28 OS=Mus musculus GN=Rbm28 PE=1 SV=4	0	7	5	7	5	750	84.2	161	7	5	0	1.095	0.982867	29.31	1.312	1.095	0.797
High	Master Protein	O88597	Beclin-1 OS=Mus musculus GN=Becn1 PE=1 SV=3	0	7	2	5	2	448	51.6	96	5	2	0	1.127	0.963467	24.31	1.311	0.542	1.127
High	Master Protein	Q9QZB0	Regulator of G-protein signaling 17 OS=Mus musculus GN=Rgs17 PE=1 SV=1	0.002	11	1	3	1	210	24.3	56	3	1	0	1.311	0.924404	22.04	1.311	1.506	0.734
High	Master Protein	D3Z494	Aldo-keto reductase family 1, member B10 (aldose reductase) OS=Mus musculus GN=Akr1b10 PE=1 SV=1	0	12	3	16	3	288	32.7	114	16	3	0	1.237	0.665207	8.78	1.311	1.237	0.942
High	Master Protein	P32233	Developmentally-regulated GTP-binding protein 1 OS=Mus musculus GN=Drg1 PE=1 SV=1	0	28	8	39	8	367	40.5	814	39	8	0	1.064	0.984558	20.01	1.31	1.064	0.92
High	Master Protein	Q8K2Q9	Shootin-1 OS=Mus musculus GN=Shtn1 PE=1 SV=1	0	3	1	4	1	631	71.3	85	4	1	0	1.31	0.855156	17.18	1.31	0.984	1.462
High	Master Protein	Q9Z2E4	Protein phosphatase 1 regulatory subunit 17 OS=Mus musculus GN=Ppp1r17 PE=1 SV=1	0	21	2	9	2	159	17.8	96	9	2	0	0.881	0.917787	8.81	1.31	0.832	0.881
High	Master Protein	Q505D1	Serine/threonine-protein phosphatase 6 regulatory ankyrin repeat subunit A OS=Mus musculus GN=Ankrd28 PE=1 SV=1	0	11	8	22	8	1053	112.8	417	22	8	0	1.31	0.665663	1.65	1.31	1.296	1.857
High	Master Protein	P70122	Ribosome maturation protein SBDS OS=Mus musculus GN=Sbds PE=1 SV=4	0	22	5	28	5	250	28.8	178	28	5	0	1.31	0.766381	31.17	1.31	1.585	1.001
High	Master Protein	P68037	Ubiquitin-conjugating enzyme E2 L3 OS=Mus musculus GN=Ube2l3 PE=1 SV=1	0	71	8	136	8	154	17.9	1454	136	8	0	1.288	0.452702	2.34	1.308	1.078	1.288
High	Master Protein	E9Q2Y3	NF-kappa-B essential modulator OS=Mus musculus GN=Ikbkg PE=1 SV=1	0	17	4	11	4	424	49.3	115	11	4	0	1.173	0.92244	15.55	1.308	1.173	1.05
High	Master Protein	Q9DC33	High mobility group protein 20A OS=Mus musculus GN=Hmg20a PE=1 SV=1	0	19	6	44	6	346	39.9	1048	44	6	0	1.308	0.401212	34.69	1.308	1.715	1.002
High	Master Protein	Q8VE47	Ubiquitin-like modifier-activating enzyme 5 OS=Mus musculus GN=Uba5 PE=1 SV=2	0	19	5	17	5	403	44.8	53	17	5	0	1.078	0.9873	23.23	1.308	1.078	0.909
High	Master Protein	Q3TW96	UDP-N-acetylhexosamine pyrophosphorylase-like protein 1 OS=Mus musculus GN=Uap1l1 PE=1 SV=1	0	14	5	18	5	507	56.6	378	18	5	0	1.407	0.643466	10.5	1.308	1.407	1.609
High	Master Protein	Q9DAW9	Calponin-3 OS=Mus musculus GN=Cnn3 PE=1 SV=1	0	42	11	97	10	330	36.4	2593	97	11	1	1.307	0.304536	5.47	1.307	1.037	1.356
High	Master Protein	Q9D8T7	SRA stem-loop-interacting RNA-binding protein, mitochondrial OS=Mus musculus GN=Slirp PE=1 SV=2	0	55	5	50	5	112	12.6	969	50	5	0	1.119	0.931984	4.16	1.307	1.088	1.119
High	Master Protein	D3Z5N6	Zinc finger protein ubi-d4 OS=Mus musculus GN=Dpf2 PE=1 SV=1	0	19	6	23	5	405	45.8	158	23	6	0	0.962	0.982867	32.59	1.307	0.962	0.789
High	Master Protein	P12815	Programmed cell death protein 6 OS=Mus musculus GN=Pdcd6 PE=1 SV=2	0	63	8	44	8	191	21.9	715	44	8	0	1.307	0.50012	6.99	1.307	1.245	1.565
High	Master Protein	P48428	Tubulin-specific chaperone A OS=Mus musculus GN=Tbca PE=1 SV=3	0	45	5	14	5	108	12.8	191	14	5	0	1.306	0.519854	22.55	1.306	1.107	1.555
High	Master Protein	Q99LM2	CDK5 regulatory subunit-associated protein 3 OS=Mus musculus GN=Cdk5rap3 PE=1 SV=1	0	31	11	32	11	503	57	512	32	11	0	1.238	0.627921	8.12	1.306	1.238	1.047
High	Master Protein	P10630	Eukaryotic initiation factor 4A-II OS=Mus musculus GN=Eif4a2 PE=1 SV=2	0	65	23	224	9	407	46.4	5004	224	23	13	1.222	0.351055	4.19	1.305	1.187	1.222
High	Master Protein	Q8BLY2	Probable threonine--tRNA ligase 2, cytoplasmic OS=Mus musculus GN=Tarsl2 PE=1 SV=1	0	25	15	88	14	790	91.3	1376	88	15	0	1.425	0.148878	12.53	1.305	1.602	1.425
High	Master Protein	Q60866	Phosphotriesterase-related protein OS=Mus musculus GN=Pter PE=1 SV=1	0	30	6	24	6	349	39.2	253	24	6	0	1.305	0.666329	2.13	1.305	1.286	1.428
High	Master Protein	Q60634	Flotillin-2 OS=Mus musculus GN=Flot2 PE=1 SV=2	0	35	12	49	12	428	47	1134	49	12	0	1.077	0.976653	31.34	1.304	0.84	1.077
High	Master Protein	E9Q804	Ankyrin repeat domain-containing protein 17 OS=Mus musculus GN=Ankrd17 PE=1 SV=3	0	9	14	28	11	2602	274	442	28	14	3	0.957	0.94007	39.39	1.304	0.957	0.636
High	Master Protein	Q8BHL8	Proteasome inhibitor PI31 subunit OS=Mus musculus GN=Psmf1 PE=1 SV=1	0	20	3	20	3	271	29.6	209	20	3	0	1.303	0.413053	0.15	1.303	1.015	1.304
High	Master Protein	Q9D1C8	Vacuolar protein sorting-associated protein 28 homolog OS=Mus musculus GN=Vps28 PE=1 SV=1	0	65	11	64	11	221	25.4	797	64	11	0	1.147	0.933429	13.55	1.303	1.042	1.147
High	Master Protein	Q6ZWN5	40S ribosomal protein S9 OS=Mus musculus GN=Rps9 PE=1 SV=3	0	49	14	194	14	194	22.6	1541	194	14	0	1.248	0.241715	5.9	1.302	1.248	1.199
High	Master Protein	Q3UUW5	Cyclin-H OS=Mus musculus GN=Ccnh PE=1 SV=1	0	10	2	10	2	327	38	263	10	2	0	1.299	0.933429	0.29	1.302	1.299	0.857
High	Master Protein	Q9CQR2	40S ribosomal protein S21 OS=Mus musculus GN=Rps21 PE=1 SV=1	0	65	7	154	7	83	9.1	3383	154	7	0	1.312	0.415668	1.24	1.301	1.312	1.323
High	Master Protein	Q9Z2D0	Myotubularin-related protein 9 OS=Mus musculus GN=Mtmr9 PE=1 SV=2	0	28	10	41	10	545	62.9	556	41	10	0	1.198	0.751718	12.62	1.3	1.198	1.015
High	Master Protein	Q8K1R3	Polyribonucleotide nucleotidyltransferase 1, mitochondrial OS=Mus musculus GN=Pnpt1 PE=1 SV=1	0	7	5	19	5	783	85.6	139	19	5	0	1.273	0.767254	3.12	1.3	1.241	1.273
High	Master Protein	Q9JM76	Actin-related protein 2/3 complex subunit 3 OS=Mus musculus GN=Arpc3 PE=1 SV=3	0	30	6	81	6	178	20.5	1617	81	6	0	1.195	0.845198	13.03	1.3	1.016	1.195
High	Master Protein	O70251	Elongation factor 1-beta OS=Mus musculus GN=Eef1b PE=1 SV=5	0	57	10	160	9	225	24.7	4492	160	10	0	0.981	0.957638	16.05	1.299	0.885	0.981
High	Master Protein	P18760	Cofilin-1 OS=Mus musculus GN=Cfl1 PE=1 SV=3	0	78	13	533	11	166	18.5	15761	533	13	1	1.299	0.122639	27.2	1.299	1.06	1.825
High	Master Protein	Q9QWR8	Alpha-N-acetylgalactosaminidase OS=Mus musculus GN=Naga PE=1 SV=2	0	23	8	38	8	415	47.2	548	38	8	0	1.298	0.406025	19.11	1.298	0.963	1.466
High	Master Protein	Q9CXF4	TBC1 domain family member 15 OS=Mus musculus GN=Tbc1d15 PE=1 SV=1	0	13	5	13	5	671	76.5	156	13	5	0	1.358	0.807358	6.55	1.298	1.358	1.53
High	Master Protein	Q99PT1	Rho GDP-dissociation inhibitor 1 OS=Mus musculus GN=Arhgdia PE=1 SV=3	0	69	12	151	12	204	23.4	1776	151	12	0	1.297	0.199547	31.78	1.297	1.019	1.848
High	Master Protein	D3YVY0	E3 ubiquitin-protein ligase MARCH1 OS=Mus musculus GN=March1 PE=1 SV=1	0	9	3	8	3	540	61.2	99	8	3	0	1.175	0.960995	15.44	1.297	1.175	0.495
High	Master Protein	Q99MR1	GRB10-interacting GYF protein 1 OS=Mus musculus GN=Gigyf1 PE=1 SV=2	0	8	4	16	4	1044	116.2	124	16	4	0	0.849	0.840603	10.7	1.297	0.791	0.849
High	Master Protein	Q9CX34	Protein SGT1 homolog OS=Mus musculus GN=Sugt1 PE=1 SV=3	0	54	14	95	14	336	38.1	2504	95	14	0	1.272	0.574691	2.9	1.297	1.068	1.272
High	Master Protein	Q9ERR1	Nuclear distribution protein nudE-like 1 OS=Mus musculus GN=Ndel1 PE=1 SV=2	0	15	5	17	3	345	38.3	173	17	5	2	1.148	0.972378	16.42	1.297	1.148	1.021
High	Master Protein	Q9EQ80	NIF3-like protein 1 OS=Mus musculus GN=Nif3l1 PE=1 SV=4	0	40	8	65	8	376	41.7	1652	65	8	0	1.297	0.473789	15.66	1.297	1.03	1.434
High	Master Protein	P61022	Calcineurin B homologous protein 1 OS=Mus musculus GN=Chp1 PE=1 SV=2	0	27	4	29	4	195	22.4	283	29	4	0	1.297	0.459082	11.92	1.297	1.401	1.109
High	Master Protein	Q8R2M2	Deoxynucleotidyltransferase terminal-interacting protein 2 OS=Mus musculus GN=Dnttip2 PE=1 SV=1	0	16	10	34	10	758	84.2	618	34	10	0	1.284	0.477932	1.42	1.297	1.284	1.083
High	Master Protein	P61971	Nuclear transport factor 2 OS=Mus musculus GN=Nutf2 PE=1 SV=1	0	45	3	36	3	127	14.5	875	36	3	0	1.297	0.496878	34.38	1.297	0.846	1.597
High	Master Protein	P80560	Receptor-type tyrosine-protein phosphatase N2 OS=Mus musculus GN=Ptprn2 PE=1 SV=2	0	7	4	17	4	1001	111.4	190	17	4	0	1.151	0.955139	18.79	1.297	0.878	1.151
High	Master Protein	Q61753	D-3-phosphoglycerate dehydrogenase OS=Mus musculus GN=Phgdh PE=1 SV=3	0	19	8	29	8	533	56.5	425	29	8	0	1.119	0.95823	23.57	1.296	0.824	1.119
High	Master Protein	Q62313	Trans-Golgi network integral membrane protein 1 OS=Mus musculus GN=Tgoln1 PE=1 SV=1	0	21	5	40	5	353	37.8	718	40	5	0	0.998	0.985166	34.09	1.296	0.998	0.808
High	Master Protein	Q543K9	Purine nucleoside phosphorylase OS=Mus musculus GN=Pnp PE=1 SV=1	0	58	10	32	10	289	32.2	289	32	10	0	1.296	0.462029	14.86	1.296	0.898	1.426
High	Master Protein	P61294	Ras-related protein Rab-6B OS=Mus musculus GN=Rab6b PE=1 SV=1	0	63	13	195	6	208	23.4	2828	195	13	0	1.15	0.886714	18.66	1.295	0.86	1.15
High	Master Protein	Q9D0C4	tRNA (guanine(37)-N1)-methyltransferase OS=Mus musculus GN=Trmt5 PE=1 SV=1	0	12	4	10	4	501	56.8	109	10	4	0	1.168	0.917994	5.72	1.295	1.123	1.168
High	Master Protein	D6RGM3	Echinoderm microtubule-associated protein-like 2 OS=Mus musculus GN=Eml2 PE=1 SV=1	0	26	7	26	7	427	46.7	439	26	7	0	1.294	0.465758	5.9	1.294	0.953	1.345
High	Master Protein	Q7TMB8	Cytoplasmic FMR1-interacting protein 1 OS=Mus musculus GN=Cyfip1 PE=1 SV=1	0	24	26	175	12	1253	145.1	3265	175	26	0	1.293	0.450686	0.09	1.293	1.293	1.4
High	Master Protein	Q8BGR3	Calcium/calmodulin-dependent protein kinase IV OS=Mus musculus GN=Camk4 PE=1 SV=1	0	18	6	19	6	469	52.5	175	19	6	0	1.112	0.975388	22.44	1.292	0.944	1.112
High	Master Protein	A0A1B0GR60	Ferritin OS=Mus musculus GN=Ftl1 PE=1 SV=1	0	59	8	54	8	160	18	838	54	8	0	1.291	0.519542	1.54	1.291	1.304	1.028
High	Master Protein	Q02819	Nucleobindin-1 OS=Mus musculus GN=Nucb1 PE=1 SV=2	0	54	20	225	9	459	53.4	3992	225	20	11	1.203	0.579348	10.77	1.291	1.049	1.203
High	Master Protein	Q61187	Tumor susceptibility gene 101 protein OS=Mus musculus GN=Tsg101 PE=1 SV=2	0	31	10	88	10	391	44.1	1544	88	10	0	1.291	0.475411	23.77	1.291	1.505	1.084
High	Master Protein	Q3TRR0	Microtubule-associated protein 9 OS=Mus musculus GN=Map9 PE=1 SV=2	0	18	7	53	7	646	73.5	327	53	7	0	0.966	0.976363	21.99	1.29	0.966	0.842
High	Master Protein	D3Z3Y1	Phosphatidylinositol glycan anchor biosynthesis, class G OS=Mus musculus GN=Pigg PE=1 SV=1	0	15	9	30	9	983	108.4	312	30	9	0	1.216	0.720937	9.02	1.29	1.012	1.216
High	Master Protein	Q9WUK2	Eukaryotic translation initiation factor 4H OS=Mus musculus GN=Eif4h PE=1 SV=3	0	49	13	96	13	248	27.3	765	96	13	0	1.195	0.655978	8.38	1.288	1.195	1.127
High	Master Protein	P46664	Adenylosuccinate synthetase isozyme 2 OS=Mus musculus GN=Adss PE=1 SV=2	0	23	9	26	7	456	50	397	26	9	0	1.59	0.322461	28.14	1.288	1.893	1.59
High	Master Protein	Q64727	Vinculin OS=Mus musculus GN=Vcl PE=1 SV=4	0	46	35	143	35	1066	116.6	2837	143	35	0	1.288	0.317234	31.84	1.288	1.011	1.571
High	Master Protein	D3YZ08	Telomeric repeat-binding factor 2 OS=Mus musculus GN=Terf2 PE=1 SV=1	0	36	14	62	14	540	60.1	1221	62	14	0	1.288	0.552294	3.3	1.288	1.317	0.859
High	Master Protein	D3Z7D0	EEF1A lysine methyltransferase 2 OS=Mus musculus GN=Eef1akmt2 PE=4 SV=1	0.001	37	2	9	2	119	13.1	63	9	2	0	1.288	0.892669	10.45	1.288	1.08	1.378
High	Master Protein	Q91YI0	Argininosuccinate lyase OS=Mus musculus GN=Asl PE=1 SV=1	0	29	11	85	11	464	51.7	1380	85	11	0	1.287	0.510235	0.56	1.287	0.896	1.292
High	Master Protein	Q8CE90	Dual specificity mitogen-activated protein kinase kinase 7 OS=Mus musculus GN=Map2k7 PE=1 SV=1	0	5	2	24	2	535	59.3	220	24	2	0	1.226	0.955872	7.35	1.287	0.994	1.226
High	Master Protein	E9Q390	Myoferlin OS=Mus musculus GN=Myof PE=1 SV=2	0	26	38	129	38	2048	233.2	1778	129	38	0	1.286	0.509745	4.67	1.286	1.522	1.246
High	Master Protein	Q9Z2G6	Protein sel-1 homolog 1 OS=Mus musculus GN=Sel1l PE=1 SV=2	0	22	10	77	10	790	88.3	1148	77	10	0	1.286	0.482606	9.96	1.286	1.373	1.057
High	Master Protein	Q3UIX4	Serine/arginine-rich-splicing factor 11 OS=Mus musculus GN=Srsf11 PE=1 SV=1	0	24	6	58	5	476	53.1	1495	58	6	1	1.074	0.993902	9.53	1.286	1.074	1.005
High	Master Protein	E9QM38	Solute carrier family 12 member 2 OS=Mus musculus GN=Slc12a2 PE=1 SV=1	0	23	21	62	21	1206	130.6	530	62	21	0	1.212	0.800316	9.13	1.286	1.212	1.056
High	Master Protein	P40124	Adenylyl cyclase-associated protein 1 OS=Mus musculus GN=Cap1 PE=1 SV=4	0	53	19	278	18	474	51.5	5468	278	19	1	1.286	0.152246	6.57	1.286	1.056	1.343
High	Master Protein	Q80TB8	Synaptic vesicle membrane protein VAT-1 homolog-like OS=Mus musculus GN=Vat1l PE=1 SV=2	0	59	20	234	20	417	45.8	4773	234	20	0	1.285	0.153458	16.56	1.285	1.066	1.429
High	Master Protein	A0A140LIS5	Arginine and glutamate-rich protein 1 (Fragment) OS=Mus musculus GN=Arglu1 PE=1 SV=1	0	12	3	8	3	215	25.9	79	8	3	0	1.035	0.996172	35.13	1.285	1.035	0.79
High	Master Protein	Q924T7	E3 ubiquitin-protein ligase RNF31 OS=Mus musculus GN=Rnf31 PE=1 SV=2	0	10	7	34	7	1066	119.2	136	34	7	0	1.151	0.938194	15.11	1.285	1.151	1.034
High	Master Protein	D3Z440	COP9 signalosome complex subunit 7a (Fragment) OS=Mus musculus GN=Cops7a PE=1 SV=8	0	26	6	31	6	226	25	717	31	6	0	1.064	0.993902	14.13	1.285	0.962	1.064
High	Master Protein	Q69ZC8	GPALPP motifs-containing protein 1 OS=Mus musculus GN=Gpalpp1 PE=1 SV=2	0	9	3	14	3	346	38.9	275	14	3	0	1.14	0.954734	9.12	1.284	1.07	1.14
High	Master Protein	O88630	Golgi SNAP receptor complex member 1 OS=Mus musculus GN=Gosr1 PE=1 SV=2	0	34	6	25	6	250	28.5	482	25	6	0	1.284	0.539648	2.15	1.284	1.265	1.432
High	Master Protein	Q8BJZ4	28S ribosomal protein S35, mitochondrial OS=Mus musculus GN=Mrps35 PE=1 SV=2	0	47	9	41	9	320	36	714	41	9	0	1.284	0.466226	35	1.284	0.981	1.766
High	Master Protein	E9Q5C9	Nucleolar and coiled-body phosphoprotein 1 OS=Mus musculus GN=Nolc1 PE=1 SV=1	0	14	8	47	8	702	73.7	1021	47	8	0	1.087	0.98287	13.68	1.284	1.087	0.986
High	Master Protein	Q6PGC1	ATP-dependent RNA helicase DHX29 OS=Mus musculus GN=Dhx29 PE=1 SV=1	0	15	14	49	14	1365	153.9	550	49	14	0	1.181	0.798435	12.88	1.284	1.181	0.869
High	Master Protein	Q8BIS8	Coiled-coil domain-containing protein 126 OS=Mus musculus GN=Ccdc126 PE=2 SV=1	0	29	4	68	4	140	15.6	1423	68	4	0	1.284	0.461965	0.69	1.284	1.278	1.71
High	Master Protein	Q9DBX2	Phosducin-like protein OS=Mus musculus GN=Pdcl PE=1 SV=1	0	34	9	57	8	301	34.4	886	57	9	0	1.091	0.968787	10.63	1.283	1.091	1.012
High	Master Protein	Q60598	Src substrate cortactin OS=Mus musculus GN=Cttn PE=1 SV=2	0	32	15	155	15	546	61.2	3039	155	15	0	1.094	0.976363	1.7	1.283	1.082	1.094
High	Master Protein	Q9CPS6	Histidine triad nucleotide-binding protein 3 OS=Mus musculus GN=Hint3 PE=1 SV=1	0	48	4	8	4	165	18.8	153	8	4	0	1.152	0.98287	5.27	1.282	1.152	1.111
High	Master Protein	P97351	40S ribosomal protein S3a OS=Mus musculus GN=Rps3a PE=1 SV=3	0	58	17	304	17	264	29.9	4737	304	17	0	1.045	0.976363	12.15	1.282	0.96	1.045
High	Master Protein	Q3UEB3	Poly(U)-binding-splicing factor PUF60 OS=Mus musculus GN=Puf60 PE=1 SV=2	0	48	18	194	18	564	60.2	2930	194	18	0	1.149	0.80982	17.11	1.281	1.149	0.911
High	Master Protein	P47857	ATP-dependent 6-phosphofructokinase, muscle type OS=Mus musculus GN=Pfkm PE=1 SV=3	0	47	29	392	24	780	85.2	7017	392	29	0	1.23	0.376022	6.14	1.281	1.13	1.23
High	Master Protein	O88520	Leucine-rich repeat protein SHOC-2 OS=Mus musculus GN=Shoc2 PE=1 SV=2	0	17	5	14	5	582	64.9	190	14	5	0	1.226	0.855493	6.58	1.281	1.226	0.843
High	Master Protein	Q9Z2Y8	Pyridoxal phosphate homeostasis protein OS=Mus musculus GN=Prosc PE=1 SV=1	0	26	5	24	5	274	30	358	24	5	0	1.444	0.393562	16.81	1.281	1.444	1.754
High	Master Protein	P28658	Ataxin-10 OS=Mus musculus GN=Atxn10 PE=1 SV=2	0	37	11	106	11	475	53.7	2925	106	11	0	1.28	0.489319	3.21	1.28	1.205	1.308
High	Master Protein	Q9WU79	Proline dehydrogenase 1, mitochondrial OS=Mus musculus GN=Prodh PE=1 SV=2	0	27	11	50	11	599	68	469	50	11	0	1.132	0.914442	19.43	1.28	1.132	0.892
High	Master Protein	E9Q8Z5	Catenin delta-1 OS=Mus musculus GN=Ctnnd1 PE=1 SV=1	0	41	28	201	1	940	104.9	3497	201	28	0	1.28	0.90094	37.97	1.28	1.999	0.952
High	Master Protein	Q80T41	Gamma-aminobutyric acid type B receptor subunit 2 OS=Mus musculus GN=Gabbr2 PE=1 SV=2	0	19	14	48	14	940	105.6	469	48	14	0	1.144	0.89122	14.75	1.28	1.144	1.03
High	Master Protein	Q3UWE6	MCG14935, isoform CRA_a OS=Mus musculus GN=Wdr20 PE=1 SV=1	0	13	5	24	5	569	62.8	76	24	5	0	1.18	0.816924	12.47	1.28	1.18	0.955
High	Master Protein	Q8BGW1	Alpha-ketoglutarate-dependent dioxygenase FTO OS=Mus musculus GN=Fto PE=1 SV=1	0	41	14	53	14	502	58	835	53	14	0	0.923	0.879381	35.88	1.279	0.743	0.923
High	Master Protein	Q8R5H1	Ubiquitin carboxyl-terminal hydrolase 15 OS=Mus musculus GN=Usp15 PE=1 SV=1	0	11	8	28	7	981	112.3	559	28	8	0	1.279	0.852263	52.63	1.279	1.733	0.78
High	Master Protein	E9Q7E2	AT-rich interactive domain 2 (ARID, RFX-like) OS=Mus musculus GN=Arid2 PE=1 SV=1	0	14	12	54	12	1828	195.9	398	54	12	0	1.202	0.775539	9.48	1.279	1.202	0.958
High	Master Protein	Q8BLN5	Lanosterol synthase OS=Mus musculus GN=Lss PE=1 SV=2	0	11	5	12	5	733	83.1	191	12	5	0	1.136	0.902729	13.53	1.279	1.136	1.032
High	Master Protein	Q8R1B4	Eukaryotic translation initiation factor 3 subunit C OS=Mus musculus GN=Eif3c PE=1 SV=1	0	26	20	126	20	911	105.5	1426	126	20	0	1.239	0.466226	4.74	1.278	1.111	1.239
High	Master Protein	Q9WVQ5	Methylthioribulose-1-phosphate dehydratase OS=Mus musculus GN=Apip PE=1 SV=1	0	54	9	55	9	241	26.9	662	55	9	0	1.278	0.549727	31.68	1.278	0.875	1.551
High	Master Protein	A0A140LI67	FERM and PDZ domain-containing 2 OS=Mus musculus GN=Frmpd2 PE=4 SV=1	0	7	6	11	6	1392	152.8	74	11	6	0	0.993	0.9873	30.28	1.277	0.993	0.825
High	Master Protein	A2AIL4	NADH dehydrogenase (ubiquinone) complex I, assembly factor 6 OS=Mus musculus GN=Ndufaf6 PE=1 SV=1	0	20	4	26	4	333	38.3	558	26	4	0	1.184	0.929261	11.64	1.277	1.184	1.072
High	Master Protein	P60867	40S ribosomal protein S20 OS=Mus musculus GN=Rps20 PE=1 SV=1	0	33	5	92	5	119	13.4	896	92	5	0	1.226	0.445196	6.1	1.276	1.226	1.075
High	Master Protein	P63325	40S ribosomal protein S10 OS=Mus musculus GN=Rps10 PE=1 SV=1	0	52	11	148	11	165	18.9	3037	148	11	0	1.276	0.452083	24.83	1.276	1.822	1.062
High	Master Protein	Q8VE52	Opioid growth factor receptor-like protein 1 OS=Mus musculus GN=Ogfrl1 PE=1 SV=2	0	17	6	36	6	464	52.2	338	36	6	0	0.93	0.914861	1.67	1.275	0.93	0.92
High	Master Protein	P70303	CTP synthase 2 OS=Mus musculus GN=Ctps2 PE=1 SV=1	0	28	10	44	8	586	65.5	1018	44	10	2	1.275	0.660647	12.66	1.275	1.117	1.384
High	Master Protein	Q8BGV0	Probable asparagine--tRNA ligase, mitochondrial OS=Mus musculus GN=Nars2 PE=1 SV=1	0	7	3	17	3	477	53.9	162	17	3	0	1.275	0.913276	2.78	1.275	1.299	0.919
High	Master Protein	P49722	Proteasome subunit alpha type-2 OS=Mus musculus GN=Psma2 PE=1 SV=3	0	51	11	242	11	234	25.9	5644	242	11	0	1.114	0.879381	5.13	1.275	1.075	1.114
High	Master Protein	Q9CZX8	40S ribosomal protein S19 OS=Mus musculus GN=Rps19 PE=1 SV=3	0	47	8	114	8	145	16.1	2399	114	8	0	1.193	0.466226	10.07	1.274	1.193	1.005
High	Master Protein	Q99LU0	Charged multivesicular body protein 1b-1 OS=Mus musculus GN=Chmp1b1 PE=1 SV=1	0.001	8	2	7	1	199	22.1	105	7	2	1	0.985	0.988622	10.33	1.274	0.985	0.92
High	Master Protein	P70429	Ena/VASP-like protein OS=Mus musculus GN=Evl PE=1 SV=2	0	32	10	46	9	414	44.3	545	46	10	0	1.273	0.497796	8.43	1.273	1.346	1.179
High	Master Protein	Q9D658	Protein tyrosine phosphatase type IVA 3 OS=Mus musculus GN=Ptp4a3 PE=1 SV=1	0	35	4	16	4	173	19.6	165	16	4	0	1.273	0.757206	35.29	1.273	1.915	0.97
High	Master Protein	Q921M7	Protein FAM49B OS=Mus musculus GN=Fam49b PE=1 SV=1	0	54	13	81	11	324	36.8	911	81	13	2	1.273	0.606945	14.16	1.273	1.152	1.594
High	Master Protein	O88665	Bromodomain-containing protein 7 OS=Mus musculus GN=Brd7 PE=1 SV=1	0	19	6	20	6	651	74	96	20	6	0	0.778	0.667583	11.11	1.273	0.778	0.723
High	Master Protein	O70161	Phosphatidylinositol 4-phosphate 5-kinase type-1 gamma OS=Mus musculus GN=Pip5k1c PE=1 SV=2	0	33	17	135	15	661	72.4	2352	135	17	3	1.113	0.955139	21.22	1.273	0.94	1.113
High	Master Protein	P17742	Peptidyl-prolyl cis-trans isomerase A OS=Mus musculus GN=Ppia PE=1 SV=2	0	85	15	564	14	164	18	12727	564	15	2	1.273	0.175479	15.91	1.273	1.074	1.409
High	Master Protein	Q9Z2I0	Mitochondrial proton/calcium exchanger protein OS=Mus musculus GN=Letm1 PE=1 SV=1	0	9	4	12	4	738	82.9	182	12	4	0	1.272	0.840829	7.23	1.272	1.334	1.207
High	Master Protein	O54946	DnaJ homolog subfamily B member 6 OS=Mus musculus GN=Dnajb6 PE=1 SV=4	0	25	8	46	8	365	39.8	505	46	8	0	1.19	0.76902	10.15	1.272	0.838	1.19
High	Master Protein	Q8K3K8	Optineurin OS=Mus musculus GN=Optn PE=1 SV=1	0	38	17	89	17	584	67	1756	89	17	0	1.097	0.956146	23.54	1.271	1.097	0.918
High	Master Protein	Q91YZ8	Polyadenylate-binding protein OS=Mus musculus GN=Pabpc4 PE=1 SV=1	0	19	9	126	2	615	67.8	3988	126	9	0	1.006	0.994535	16.89	1.271	0.891	1.006
High	Master Protein	B1AV66	Protein YIPF (Fragment) OS=Mus musculus GN=Yipf6 PE=1 SV=1	0	8	2	11	2	198	21.8	90	11	2	0	1.142	0.965149	16.81	1.271	1.142	0.975
High	Master Protein	Q8C6G8	WD repeat-containing protein 26 OS=Mus musculus GN=Wdr26 PE=1 SV=3	0	37	15	49	1	641	70.5	613	49	15	12	1.222	0.688028	5.95	1.271	1.024	1.222
High	Master Protein	Q8BH58	TIP41-like protein OS=Mus musculus GN=Tiprl PE=1 SV=1	0	55	9	113	9	271	31.2	1190	113	9	0	1.27	0.591117	17.63	1.27	1.1	1.422
High	Master Protein	B9EHJ3	Tight junction protein ZO-1 OS=Mus musculus GN=Tjp1 PE=1 SV=1	0	44	47	361	47	1685	188.7	3847	361	47	0	1.182	0.643466	4.24	1.27	1.182	1.148
High	Master Protein	Q9R099	Transducin beta-like protein 2 OS=Mus musculus GN=Tbl2 PE=1 SV=2	0	49	15	95	15	442	49.6	1713	95	15	0	1.241	0.691178	3.51	1.27	1.241	0.996
High	Master Protein	P62082	40S ribosomal protein S7 OS=Mus musculus GN=Rps7 PE=2 SV=1	0	67	13	289	13	194	22.1	6504	289	13	0	1.27	0.16156	22.11	1.27	1.459	1.039
High	Master Protein	Q80Y55	BSD domain-containing protein 1 OS=Mus musculus GN=Bsdc1 PE=1 SV=1	0	12	4	20	4	427	46.9	202	20	4	0	0.91	0.966747	10.13	1.27	0.852	0.91
High	Master Protein	G3UWR2	GRB10-interacting GYF protein 2 OS=Mus musculus GN=Gigyf2 PE=1 SV=1	0	9	7	13	7	1122	129.6	163	13	7	0	1.148	0.981353	15.69	1.27	1.148	0.796
High	Master Protein	Q8QZY1	Eukaryotic translation initiation factor 3 subunit L OS=Mus musculus GN=Eif3l PE=1 SV=1	0	50	22	136	22	564	66.6	2317	136	22	0	1.227	0.746214	5.13	1.27	1.227	1.149
High	Master Protein	E9Q1S3	Protein transport protein Sec23A OS=Mus musculus GN=Sec23a PE=1 SV=1	0	46	25	152	23	736	82.9	2848	152	25	2	1.121	0.894632	13.61	1.269	1.018	1.121
High	Master Protein	Q99JP4	Anaphase-promoting complex subunit CDC26 OS=Mus musculus GN=Cdc26 PE=1 SV=1	0	51	3	13	3	85	9.8	141	13	3	0	1.067	0.988622	28.13	1.269	1.067	0.77
High	Master Protein	Q9D662	Protein transport protein Sec23B OS=Mus musculus GN=Sec23b PE=1 SV=1	0	24	12	44	10	767	86.4	481	44	12	0	1.137	0.902787	2.34	1.269	1.137	1.119
High	Master Protein	Q8R0H9	ADP-ribosylation factor-binding protein GGA1 OS=Mus musculus GN=Gga1 PE=1 SV=1	0	9	4	26	4	635	69.9	88	26	4	0	1.268	0.720937	21.31	1.268	1.083	1.451
High	Master Protein	Q8CI32	BAG family molecular chaperone regulator 5 OS=Mus musculus GN=Bag5 PE=1 SV=1	0	32	11	87	11	447	50.9	836	87	11	0	1.267	0.522666	26.36	1.267	1.594	1.042
High	Master Protein	P32507	Nectin-2 OS=Mus musculus GN=Nectin2 PE=1 SV=2	0	12	4	7	4	530	57.3	69	7	4	0	1.267	0.789296	3.77	1.267	1.3	0.719
High	Master Protein	Q9CQ69	Cytochrome b-c1 complex subunit 8 OS=Mus musculus GN=Uqcrq PE=1 SV=3	0	60	7	131	7	82	9.8	1526	131	7	0	1.248	0.230415	2.2	1.267	1.248	0.899
High	Master Protein	E9PW37	RAS protein activator-like 2 OS=Mus musculus GN=Rasal2 PE=1 SV=1	0	14	12	32	10	1286	144.5	876	32	12	0	1.267	0.634283	4.95	1.267	1.856	1.224
High	Master Protein	A0A1B0GR08	Gamma-tubulin complex component (Fragment) OS=Mus musculus GN=Tubgcp2 PE=1 SV=1	0	8	5	39	5	900	102.7	689	39	5	0	1.246	0.873883	2.24	1.265	1.246	1.14
High	Master Protein	Q9Z1Z2	Serine-threonine kinase receptor-associated protein OS=Mus musculus GN=Strap PE=1 SV=2	0	54	11	112	11	350	38.4	2305	112	11	0	1.21	0.688028	6.72	1.265	0.952	1.21
High	Master Protein	P30999	Catenin delta-1 OS=Mus musculus GN=Ctnnd1 PE=1 SV=2	0	43	29	204	2	938	104.9	3473	204	29	25	1.192	0.731332	2.83	1.265	1.192	1.169
High	Master Protein	Q9DBL1	Short/branched chain specific acyl-CoA dehydrogenase, mitochondrial OS=Mus musculus GN=Acadsb PE=1 SV=1	0	30	9	56	9	432	47.8	810	56	9	0	1.264	0.573183	6.56	1.264	1.208	1.366
High	Master Protein	Q9ERN0	Secretory carrier-associated membrane protein 2 OS=Mus musculus GN=Scamp2 PE=1 SV=1	0	4	1	21	1	329	36.4	585	21	1	0	1.264	0.74355	24.46	1.264	1.473	1.033
High	Master Protein	E9PYI8	Ubiquitin carboxyl-terminal hydrolase 14 OS=Mus musculus GN=Usp14 PE=1 SV=1	0	41	14	74	14	458	52.3	1539	74	14	0	1.264	0.514659	4.37	1.264	1.143	1.301
High	Master Protein	D3Z0V7	TSC22 domain family protein 1 OS=Mus musculus GN=Tsc22d1 PE=1 SV=1	0	11	5	15	4	995	102	192	15	5	1	1.146	0.945863	15.22	1.264	0.753	1.146
High	Master Protein	Q60809	CCR4-NOT transcription complex subunit 7 OS=Mus musculus GN=Cnot7 PE=1 SV=1	0	36	6	12	6	285	32.7	174	12	6	0	1.264	0.565128	21.86	1.264	1.077	1.586
High	Master Protein	P59325	Eukaryotic translation initiation factor 5 OS=Mus musculus GN=Eif5 PE=1 SV=1	0	26	12	60	12	429	48.9	703	60	12	0	1.135	0.93756	6.17	1.264	1.088	1.135
High	Master Protein	P28650	Adenylosuccinate synthetase isozyme 1 OS=Mus musculus GN=Adssl1 PE=1 SV=2	0	47	17	132	15	457	50.2	2012	132	17	2	1.264	0.522448	9.02	1.264	1.187	1.414
High	Master Protein	Q9CW79	Golgin subfamily A member 1 OS=Mus musculus GN=Golga1 PE=1 SV=2	0	14	7	19	7	758	87.3	271	19	7	0	1.2	0.775539	6.89	1.263	1.144	1.2
High	Master Protein	P68040	Receptor of activated protein C kinase 1 OS=Mus musculus GN=Rack1 PE=1 SV=3	0	88	22	333	22	317	35.1	7955	333	22	0	1.263	0.198995	11.27	1.263	1.066	1.359
High	Master Protein	P47738	Aldehyde dehydrogenase, mitochondrial OS=Mus musculus GN=Aldh2 PE=1 SV=1	0	46	17	157	16	519	56.5	3503	157	17	0	1.263	0.482954	7.47	1.263	1.199	1.771
High	Master Protein	P70452	Syntaxin-4 OS=Mus musculus GN=Stx4 PE=1 SV=1	0	18	4	14	4	298	34.1	82	14	4	0	1.263	0.762229	4.91	1.263	1.304	1.027
High	Master Protein	Q9CVB6	Actin-related protein 2/3 complex subunit 2 OS=Mus musculus GN=Arpc2 PE=1 SV=3	0	68	17	282	17	300	34.3	4109	282	17	0	1.17	0.660404	0.31	1.262	1.17	1.168
High	Master Protein	P99027	60S acidic ribosomal protein P2 OS=Mus musculus GN=Rplp2 PE=1 SV=3	0	93	7	198	7	115	11.6	6807	198	7	0	1.081	0.900791	18.2	1.262	0.948	1.081
High	Master Protein	Q8BNA6	Protocadherin Fat 3 OS=Mus musculus GN=Fat3 PE=1 SV=2	0	1	2	10	2	4555	501.7	76	10	2	0	1.273	0.964925	1.37	1.262	1.647	1.273
High	Master Protein	Q9WVT6	Carbonic anhydrase 14 OS=Mus musculus GN=Ca14 PE=1 SV=1	0	24	8	154	8	337	37.5	3309	154	8	0	1.262	0.253751	21.73	1.262	1.584	1.077
High	Master Protein	Q3THK3	General transcription factor IIF subunit 1 OS=Mus musculus GN=Gtf2f1 PE=1 SV=2	0	21	8	46	8	508	57.2	640	46	8	0	1.147	0.894632	14.72	1.261	1.147	0.662
High	Master Protein	F6RPJ9	Insulin-degrading enzyme (Fragment) OS=Mus musculus GN=Ide PE=1 SV=1	0	41	30	208	30	987	114.2	2170	208	30	0	1.261	0.401474	29.34	1.261	1.511	0.982
High	Master Protein	Q91YL3	Uridine-cytidine kinase-like 1 OS=Mus musculus GN=Uckl1 PE=1 SV=1	0	42	14	56	14	548	60.8	503	56	14	0	1.096	0.970864	5.71	1.261	1.054	1.096
High	Master Protein	Q62074	Protein kinase C iota type OS=Mus musculus GN=Prkci PE=1 SV=3	0	23	9	46	9	595	68.2	574	46	9	0	1.261	0.584806	13.5	1.261	1.375	1.085
High	Master Protein	Q6PDI6	Ubiquitin carboxyl-terminal hydrolase MINDY-2 OS=Mus musculus GN=Mindy2 PE=1 SV=1	0	29	11	75	10	601	65.6	858	75	11	1	1.116	0.97057	9.99	1.261	1.116	1.041
High	Master Protein	Q9WUM4	Coronin-1C OS=Mus musculus GN=Coro1c PE=1 SV=2	0	40	17	150	16	474	53.1	2616	150	17	1	1.26	0.314094	10	1.26	1.175	1.436
High	Master Protein	Q9CY64	Biliverdin reductase A OS=Mus musculus GN=Blvra PE=1 SV=1	0	24	6	28	6	295	33.5	535	28	6	0	1.26	0.761335	9.04	1.26	1.104	1.337
High	Master Protein	B2RY56	RNA-binding protein 25 OS=Mus musculus GN=Rbm25 PE=1 SV=2	0	18	12	82	12	838	99.5	1513	82	12	0	1.26	0.598766	14.45	1.26	1.383	1.106
High	Master Protein	Q9Z0U1	Tight junction protein ZO-2 OS=Mus musculus GN=Tjp2 PE=1 SV=2	0	32	31	189	31	1167	131.2	1362	189	31	0	1.185	0.856949	9.2	1.26	1.185	1.112
High	Master Protein	Q9ERT9	Protein phosphatase 1 regulatory subunit 1A OS=Mus musculus GN=Ppp1r1a PE=1 SV=1	0	60	8	60	8	171	18.7	878	60	8	0	1.19	0.779196	8.69	1.26	0.995	1.19
High	Master Protein	Q8C5L3	CCR4-NOT transcription complex subunit 2 OS=Mus musculus GN=Cnot2 PE=1 SV=2	0	29	7	15	7	540	59.7	76	15	7	0	1.26	0.541726	6.39	1.26	1.206	1.466
High	Master Protein	Q6P3A8	2-oxoisovalerate dehydrogenase subunit beta, mitochondrial OS=Mus musculus GN=Bckdhb PE=1 SV=2	0	8	2	5	2	390	42.9	53	5	2	0	1.26	0.905814	0.25	1.26	1.258	1.406
High	Master Protein	O89017	Legumain OS=Mus musculus GN=Lgmn PE=1 SV=1	0.001	6	1	7	1	435	49.3	77	7	1	0	1.259	0.967947	8.28	1.259	1.612	1.189
High	Master Protein	G5E8J3	Bromodomain and WD repeat domain containing 2, isoform CRA_a OS=Mus musculus GN=Wdr11 PE=1 SV=1	0	15	12	52	12	1223	135.9	637	52	12	0	1.132	0.942525	1.42	1.259	1.121	1.132
High	Master Protein	Q8BHG1	Nardilysin OS=Mus musculus GN=Nrdc PE=1 SV=1	0	13	9	25	9	1161	132.8	335	25	9	0	1.258	0.615737	13.63	1.258	0.927	1.374
High	Master Protein	P70195	Proteasome subunit beta type-7 OS=Mus musculus GN=Psmb7 PE=1 SV=1	0	71	14	188	14	277	29.9	2990	188	14	0	1.258	0.5199	0.95	1.258	1.111	1.266
High	Master Protein	P14131	40S ribosomal protein S16 OS=Mus musculus GN=Rps16 PE=1 SV=4	0	51	8	110	8	146	16.4	2046	110	8	0	1.208	0.386507	6.09	1.258	1.208	1.033
High	Master Protein	E9QMI6	Pre-mRNA-processing factor 40 homolog B (Fragment) OS=Mus musculus GN=Prpf40b PE=1 SV=1	0	14	7	35	6	852	97	530	35	7	0	1.258	0.759901	7.36	1.258	1.421	1.196
High	Master Protein	A0A1Y7VK76	Isoprenoid synthase domain-containing protein OS=Mus musculus GN=Ispd PE=4 SV=1	0	20	3	36	3	348	38.9	139	36	3	0	1.258	0.772991	14.7	1.258	1.133	1.788
High	Master Protein	Q61699	Heat shock protein 105 kDa OS=Mus musculus GN=Hsph1 PE=1 SV=2	0	41	21	179	19	858	96.3	2784	179	21	0	1.257	0.545722	0.08	1.257	1.139	1.258
High	Master Protein	Q8BIW1	Exopolyphosphatase PRUNE1 OS=Mus musculus GN=Prune1 PE=1 SV=1	0	10	2	15	2	454	50.2	372	15	2	0	1.257	0.553851	1.05	1.257	1.266	1.217
High	Master Protein	E0CX20	Protein BUD31 homolog OS=Mus musculus GN=Bud31 PE=1 SV=1	0	58	9	86	9	144	17	1259	86	9	0	1.257	0.646612	3.44	1.257	1.286	0.89
High	Master Protein	O54724	Caveolae-associated protein 1 OS=Mus musculus GN=Cavin1 PE=1 SV=1	0	42	10	39	10	392	43.9	518	39	10	0	1.257	0.59941	14.66	1.257	1.809	1.133
High	Master Protein	E9Q6X0	Microtubule-associated protein RP/EB family member 2 OS=Mus musculus GN=Mapre2 PE=1 SV=1	0	60	14	166	12	284	32.2	2355	166	14	1	1.133	0.894632	16.26	1.257	1.133	1.007
High	Master Protein	A0A087WRG0	6-phosphofructo-2-kinase/fructose-2,6-bisphosphatase 2 OS=Mus musculus GN=Pfkfb2 PE=1 SV=1	0	43	19	60	19	533	61.5	449	60	19	0	1.257	0.535736	12.55	1.257	1.626	1.15
High	Master Protein	P42337	Phosphatidylinositol 4,5-bisphosphate 3-kinase catalytic subunit alpha isoform OS=Mus musculus GN=Pik3ca PE=1 SV=2	0	11	7	25	7	1068	124.3	134	25	7	0	1.02	0.999996	11.03	1.256	1.02	0.944
High	Master Protein	Q924H2	Mediator of RNA polymerase II transcription subunit 15 OS=Mus musculus GN=Med15 PE=1 SV=2	0	2	1	10	1	792	87	136	10	1	0	1.08	0.989746	22.38	1.256	1.08	0.917
High	Master Protein	A0A087WSE3	Striated muscle-specific serine/threonine-protein kinase (Fragment) OS=Mus musculus GN=Speg PE=1 SV=1	0	1	2	6	2	3010	328.2	87	6	2	0	1.484	0.816924	19.07	1.255	1.484	1.675
High	Master Protein	P97390	Vacuolar protein sorting-associated protein 45 OS=Mus musculus GN=Vps45 PE=1 SV=1	0	35	18	121	18	570	65	2746	121	18	0	1.02	0.993508	10.42	1.255	1.02	0.948
High	Master Protein	P30275	Creatine kinase U-type, mitochondrial OS=Mus musculus GN=Ckmt1 PE=1 SV=1	0	64	23	665	18	418	47	11475	665	23	5	1.255	0.222107	10.2	1.255	1.169	1.434
High	Master Protein	Q61151	Serine/threonine-protein phosphatase 2A 56 kDa regulatory subunit epsilon isoform OS=Mus musculus GN=Ppp2r5e PE=1 SV=3	0	33	13	160	11	467	54.7	2567	160	13	1	1.068	0.997037	3.78	1.255	1.04	1.068
High	Master Protein	P70296	Phosphatidylethanolamine-binding protein 1 OS=Mus musculus GN=Pebp1 PE=1 SV=3	0	94	14	465	14	187	20.8	11122	465	14	0	1.255	0.22259	14.38	1.255	1.133	1.672
High	Master Protein	A0A0G2JGL8	Putative ATP-dependent RNA helicase DHX30 OS=Mus musculus GN=Dhx30 PE=1 SV=1	0	17	13	46	13	1186	132.9	506	46	13	0	1.233	0.674611	2.65	1.255	1.233	1.124
High	Master Protein	Q7TQK4	Exosome complex component RRP40 OS=Mus musculus GN=Exosc3 PE=1 SV=3	0	23	4	22	4	274	29.5	336	22	4	0	1.254	0.929727	28.44	1.254	1.748	1.014
High	Master Protein	Q71M36	Chondroitin sulfate proteoglycan 5 OS=Mus musculus GN=Cspg5 PE=1 SV=2	0	30	10	61	10	566	60.4	640	61	10	0	1.068	0.993902	23.46	1.254	0.899	1.068
High	Master Protein	A2A4N9	ATP-dependent RNA helicase DHX8 (Fragment) OS=Mus musculus GN=Dhx8 PE=1 SV=8	0	11	8	28	7	1174	134.3	320	28	8	0	0.954	0.984017	24.45	1.254	0.954	0.819
High	Master Protein	Q60996	Serine/threonine-protein phosphatase 2A 56 kDa regulatory subunit gamma isoform OS=Mus musculus GN=Ppp2r5c PE=1 SV=2	0	31	12	117	3	524	60.8	2147	117	12	3	1.254	0.564203	11.12	1.254	1.348	1.14
High	Master Protein	Q8K273	Membrane magnesium transporter 1 OS=Mus musculus GN=Mmgt1 PE=1 SV=1	0	31	3	36	3	131	14.7	520	36	3	0	1.182	0.802729	8.97	1.254	1.182	0.881
High	Master Protein	Q8R2S9	Actin-related protein 8 OS=Mus musculus GN=Actr8 PE=2 SV=1	0	15	6	20	6	624	70.5	188	20	6	0	1.104	0.976363	20.09	1.254	0.853	1.104
High	Master Protein	P17183	Gamma-enolase OS=Mus musculus GN=Eno2 PE=1 SV=2	0	82	27	3581	20	434	47.3	128356	3581	27	2	1.254	0.225851	18.45	1.254	1.077	1.41
High	Master Protein	Q9JMG1	Endothelial differentiation-related factor 1 OS=Mus musculus GN=Edf1 PE=1 SV=1	0	21	4	34	4	148	16.4	188	34	4	0	1.013	0.991283	35.23	1.254	1.013	0.687
High	Master Protein	A0A0G2JGW9	Far upstream element-binding protein 1 OS=Mus musculus GN=Fubp1 PE=1 SV=1	0	48	23	362	8	643	67.5	5232	362	23	13	1.063	0.976363	10.76	1.254	1.063	0.986
High	Master Protein	Q9QZM2	DNA polymerase subunit gamma-2, mitochondrial OS=Mus musculus GN=Polg2 PE=1 SV=2	0	18	4	11	4	459	51.4	180	11	4	0	1.172	0.909582	10.36	1.253	1.172	0.959
High	Master Protein	Q91Z53	Glyoxylate reductase/hydroxypyruvate reductase OS=Mus musculus GN=Grhpr PE=1 SV=1	0	41	9	75	9	328	35.3	1866	75	9	0	1.253	0.610046	13.77	1.253	0.903	1.37
High	Master Protein	Q8BKI2	Trinucleotide repeat-containing gene 6B protein OS=Mus musculus GN=Tnrc6b PE=1 SV=2	0	13	13	69	13	1810	191.8	1371	69	13	0	1.01	0.993902	0.71	1.253	1.01	1.005
High	Master Protein	Q5DTY9	BTB/POZ domain-containing protein KCTD16 OS=Mus musculus GN=Kctd16 PE=1 SV=2	0	19	7	41	6	427	48.9	181	41	7	0	1.082	0.993902	23.41	1.253	1.082	0.909
High	Master Protein	J3QNU6	Beta-arrestin-1 OS=Mus musculus GN=Arrb1 PE=1 SV=1	0	50	13	176	11	419	47.1	1789	176	13	1	1.253	0.614708	7.68	1.253	1.188	1.357
High	Master Protein	P17751	Triosephosphate isomerase OS=Mus musculus GN=Tpi1 PE=1 SV=4	0	76	20	1904	20	299	32.2	57384	1904	20	0	1.207	0.392359	5.58	1.253	0.939	1.207
High	Master Protein	Q9D7J4	Cytochrome c oxidase protein 20 homolog OS=Mus musculus GN=Cox20 PE=1 SV=1	0	32	3	40	3	117	13.2	333	40	3	0	1.252	0.59677	0.98	1.252	1.261	1.022
High	Master Protein	O54950	5'-AMP-activated protein kinase subunit gamma-1 OS=Mus musculus GN=Prkag1 PE=1 SV=2	0	39	8	45	8	330	37.5	809	45	8	0	1.136	0.901143	15.17	1.252	1.136	0.856
High	Master Protein	Q5BU09	E2F-associated phosphoprotein OS=Mus musculus GN=Eapp PE=1 SV=2	0	21	4	11	4	281	32.5	60	11	4	0	1.252	0.955872	49.86	1.252	1.719	0.831
High	Master Protein	Q8K2F0	Bromodomain-containing protein 3 OS=Mus musculus GN=Brd3 PE=1 SV=2	0	25	14	60	9	726	79.7	896	60	14	5	1.111	0.967561	18.83	1.252	1.111	0.626
High	Master Protein	Q5SVR0	TBC1 domain family member 9B OS=Mus musculus GN=Tbc1d9b PE=1 SV=1	0	3	2	5	2	1263	141.7	138	5	2	0	1.361	0.817379	11.89	1.251	1.483	1.361
High	Master Protein	F8WJ93	Echinoderm microtubule-associated protein-like 4 OS=Mus musculus GN=Eml4 PE=1 SV=1	0	10	6	20	6	988	109.9	244	20	6	0	1.16	0.932519	11.6	1.251	0.938	1.16
High	Master Protein	Q09XV5	Chromodomain-helicase-DNA-binding protein 8 OS=Mus musculus GN=Chd8 PE=1 SV=1	0	5	9	16	6	2582	290.7	67	16	9	0	1.123	0.981178	7.9	1.251	1.063	1.123
High	Master Protein	Q8BHT6	Beta-1,3-glucosyltransferase OS=Mus musculus GN=B3glct PE=1 SV=3	0	17	5	29	5	489	55.3	511	29	5	0	1.251	0.769144	18.99	1.251	1.09	1.602
High	Master Protein	Q9D6N5	Dr1-associated corepressor OS=Mus musculus GN=Drap1 PE=1 SV=3	0	27	4	29	4	205	22.3	748	29	4	0	1.25	0.575905	8.05	1.25	1.318	0.925
High	Master Protein	P60843	Eukaryotic initiation factor 4A-I OS=Mus musculus GN=Eif4a1 PE=1 SV=1	0	50	20	245	7	406	46.1	5518	245	20	0	1.336	0.219044	3.36	1.25	1.336	1.366
High	Master Protein	Q8CHS8	Vacuolar protein sorting-associated protein 37A OS=Mus musculus GN=Vps37a PE=1 SV=1	0	29	8	42	8	397	44.4	963	42	8	0	1.2	0.731483	6.11	1.249	0.982	1.2
High	Master Protein	G5E905	RIKEN cDNA 9030612M13 OS=Mus musculus GN=Zfp871 PE=1 SV=1	0	9	4	9	4	615	71.5	51	9	4	0	1.249	0.922517	31.17	1.249	1.512	0.845
High	Master Protein	O88851	Putative hydrolase RBBP9 OS=Mus musculus GN=Rbbp9 PE=1 SV=2	0	63	8	86	8	186	20.9	1411	86	8	0	1.249	0.685094	38.3	1.249	0.927	1.735
High	Master Protein	Q9D1R9	60S ribosomal protein L34 OS=Mus musculus GN=Rpl34 PE=1 SV=2	0	38	7	94	7	117	13.3	1245	94	7	0	1.187	0.680578	7.71	1.249	1.187	1.082
High	Master Protein	P63242	Eukaryotic translation initiation factor 5A-1 OS=Mus musculus GN=Eif5a PE=1 SV=2	0	85	10	228	10	154	16.8	4477	228	10	0	1.249	0.256587	2.64	1.249	1.292	1.227
High	Master Protein	O70591	Prefoldin subunit 2 OS=Mus musculus GN=Pfdn2 PE=1 SV=2	0	36	4	11	4	154	16.5	209	11	4	0	1.249	0.598859	19.49	1.249	1.413	1.077
High	Master Protein	Q3UUQ7	GPI inositol-deacylase OS=Mus musculus GN=Pgap1 PE=1 SV=3	0	12	8	37	8	922	104.5	603	37	8	0	1.249	0.614833	14.93	1.249	1.374	1.06
High	Master Protein	Q9D892	Inosine triphosphate pyrophosphatase OS=Mus musculus GN=Itpa PE=1 SV=2	0	74	8	106	8	198	21.9	2384	106	8	0	1.249	0.657215	26.46	1.249	1.026	1.48
High	Master Protein	Q9DCS2	Methyltransferase-like 26 OS=Mus musculus GN=Mettl26 PE=1 SV=1	0	40	5	21	5	204	22.7	515	21	5	0	0.999	0.985275	14.05	1.248	0.999	0.912
High	Master Protein	Q91WI7	KICSTOR complex protein ITFG2 OS=Mus musculus GN=Itfg2 PE=2 SV=1	0	18	3	16	3	443	48.9	66	16	3	0	1.24	0.829475	1.04	1.248	1.097	1.24
High	Master Protein	Q80ZI6	E3 ubiquitin-protein ligase LRSAM1 OS=Mus musculus GN=Lrsam1 PE=1 SV=1	0	11	6	19	6	727	83.9	227	19	6	0	1.111	0.987188	13.64	1.248	1.008	1.111
High	Master Protein	Q6P8N8	ATP-dependent Clp protease ATP-binding subunit clpX-like, mitochondrial OS=Mus musculus GN=Clpx PE=1 SV=1	0	19	9	13	9	620	67.3	156	13	9	0	1.248	0.792976	6.83	1.248	1.306	1.067
High	Master Protein	Q91VR8	Protein BRICK1 OS=Mus musculus GN=Brk1 PE=1 SV=1	0	55	4	32	4	75	8.8	260	32	4	0	1.012	0.98287	5.25	1.248	0.976	1.012
High	Master Protein	Q8JZV7	N-acetylglucosamine-6-phosphate deacetylase OS=Mus musculus GN=Amdhd2 PE=1 SV=1	0	16	4	10	4	409	43.5	222	10	4	0	1.248	0.775636	43.09	1.248	0.885	1.732
High	Master Protein	Q07076	Annexin A7 OS=Mus musculus GN=Anxa7 PE=1 SV=2	0	27	10	51	10	463	49.9	1165	51	10	0	1.247	0.637185	12.28	1.247	1.144	1.804
High	Master Protein	A0A0A6YWM8	Mitogen-activated protein kinase kinase kinase kinase 4 OS=Mus musculus GN=Map4k4 PE=1 SV=1	0	12	8	46	7	1272	144.6	414	46	8	0	1.175	0.911778	7.53	1.247	1.115	1.175
High	Master Protein	Q01853	Transitional endoplasmic reticulum ATPase OS=Mus musculus GN=Vcp PE=1 SV=4	0	77	64	1122	64	806	89.3	21511	1122	64	0	1.209	0.381862	4.56	1.247	1.024	1.209
High	Master Protein	Q9DCZ1	GMP reductase 1 OS=Mus musculus GN=Gmpr PE=1 SV=1	0	20	5	25	5	345	37.5	633	25	5	0	1.122	0.924905	0.11	1.247	1.122	1.121
High	Master Protein	Q9CQH7	Transcription factor BTF3 homolog 4 OS=Mus musculus GN=Btf3l4 PE=1 SV=1	0	24	2	26	2	158	17.3	818	26	2	0	1.246	0.568055	1.61	1.246	0.973	1.26
High	Master Protein	Q9CZX0	Elongator complex protein 3 OS=Mus musculus GN=Elp3 PE=1 SV=1	0	35	17	107	17	547	62.3	976	107	17	0	1.201	0.823858	5.64	1.246	1.201	1.125
High	Master Protein	P62309	Small nuclear ribonucleoprotein G OS=Mus musculus GN=Snrpg PE=1 SV=1	0	37	4	72	4	76	8.5	1232	72	4	0	1.071	0.989104	17.46	1.246	1.071	0.945
High	Master Protein	P54775	26S proteasome regulatory subunit 6B OS=Mus musculus GN=Psmc4 PE=1 SV=2	0	64	19	203	19	418	47.4	3215	203	19	0	1.228	0.54377	2.18	1.246	1.006	1.228
High	Master Protein	Q80X90	Filamin-B OS=Mus musculus GN=Flnb PE=1 SV=3	0	30	48	196	42	2602	277.7	2630	196	48	2	1.245	0.659028	14.82	1.245	1.37	1.073
High	Master Protein	Q9ERF3	WD repeat-containing protein 61 OS=Mus musculus GN=Wdr61 PE=1 SV=1	0	61	10	103	10	305	33.8	2145	103	10	0	1.081	0.984017	13.41	1.245	1.081	0.983
High	Master Protein	E9Q4Z6	Double zinc ribbon and ankyrin repeat-containing protein 1 OS=Mus musculus GN=Dzank1 PE=1 SV=1	0	19	10	30	10	779	85.1	281	30	10	0	1.095	0.979115	0.23	1.245	1.093	1.095
High	Master Protein	Q9DCJ9	N-acetylneuraminate lyase OS=Mus musculus GN=Npl PE=1 SV=1	0	29	6	18	6	320	35.1	318	18	6	0	1.245	0.589917	14.45	1.245	1.394	1.123
High	Master Protein	Q80TL7	Protein MON2 homolog OS=Mus musculus GN=Mon2 PE=1 SV=2	0	9	11	35	11	1715	189	381	35	11	0	1.244	0.632909	10.96	1.244	1.153	1.644
High	Master Protein	O88543	COP9 signalosome complex subunit 3 OS=Mus musculus GN=Cops3 PE=1 SV=3	0	47	15	111	15	423	47.8	2450	111	15	0	1.193	0.766412	6.43	1.244	1.009	1.193
High	Master Protein	O08583	THO complex subunit 4 OS=Mus musculus GN=Alyref PE=1 SV=3	0	48	8	222	5	255	26.9	6075	222	8	4	1.244	0.262494	5.32	1.244	1.289	0.814
High	Master Protein	Q91WE2	Protein FAM192A OS=Mus musculus GN=Fam192a PE=1 SV=1	0	23	5	33	5	254	28.7	427	33	5	0	1.015	0.996284	0.96	1.244	1.009	1.015
High	Master Protein	P97371	Proteasome activator complex subunit 1 OS=Mus musculus GN=Psme1 PE=1 SV=2	0	55	12	87	11	249	28.7	1462	87	12	1	1.244	0.592112	16.28	1.244	1.107	1.773
High	Master Protein	Q8K2L8	Trafficking protein particle complex subunit 12 OS=Mus musculus GN=Trappc12 PE=1 SV=2	0	31	15	41	15	797	87.6	745	41	15	0	0.969	0.968339	17.92	1.244	0.969	0.864
High	Master Protein	Q9CWK8	Sorting nexin-2 OS=Mus musculus GN=Snx2 PE=1 SV=2	0	31	14	37	12	519	58.4	498	37	14	0	1.194	0.760577	6.21	1.244	0.902	1.194
High	Master Protein	Q3UPL0	Protein transport protein Sec31A OS=Mus musculus GN=Sec31a PE=1 SV=2	0	39	33	231	33	1230	133.5	3829	231	33	0	1.244	0.396888	1.96	1.244	1.227	1.3
High	Master Protein	E9QM77	Ataxin-2 OS=Mus musculus GN=Atxn2 PE=1 SV=1	0	15	13	57	13	1286	136.4	841	57	13	0	1.016	0.997037	4.56	1.243	0.985	1.016
High	Master Protein	O08807	Peroxiredoxin-4 OS=Mus musculus GN=Prdx4 PE=1 SV=1	0	41	8	61	7	274	31	1326	61	8	0	1.243	0.605972	5.94	1.243	0.933	1.293
High	Master Protein	Q3TGG2	Ataxin-2-like protein OS=Mus musculus GN=Atxn2l PE=1 SV=1	0	25	15	100	1	994	105.4	1413	100	15	0	1.123	0.985166	15.84	1.243	1.123	0.975
High	Master Protein	Q99L27	GMP reductase 2 OS=Mus musculus GN=Gmpr2 PE=1 SV=2	0	12	3	10	3	348	38	187	10	3	0	1.243	0.800098	0.95	1.243	1.251	1.094
High	Master Protein	P48774	Glutathione S-transferase Mu 5 OS=Mus musculus GN=Gstm5 PE=1 SV=1	0	64	15	306	15	224	26.6	4692	306	15	0	1.243	0.395027	22.37	1.243	1.002	1.43
High	Master Protein	Q3UPH1	Protein PRRC1 OS=Mus musculus GN=Prrc1 PE=1 SV=1	0	13	3	19	3	443	46.3	321	19	3	0	1.317	0.574625	8.39	1.243	1.317	1.548
High	Master Protein	Q9WUA2	Phenylalanine--tRNA ligase beta subunit OS=Mus musculus GN=Farsb PE=1 SV=2	0	39	19	104	19	589	65.7	1970	104	19	0	1.179	0.805862	7.97	1.242	1.179	1.094
High	Master Protein	P62192	26S proteasome regulatory subunit 4 OS=Mus musculus GN=Psmc1 PE=1 SV=1	0	56	19	149	19	440	49.2	3182	149	19	0	1.242	0.274034	6.8	1.242	1.07	1.299
High	Master Protein	Q91WK5	Glycine cleavage system H protein, mitochondrial OS=Mus musculus GN=Gcsh PE=1 SV=2	0	18	2	34	2	170	18.6	794	34	2	0	1.242	0.651597	18.05	1.242	1.091	1.97
High	Master Protein	P29595	NEDD8 OS=Mus musculus GN=Nedd8 PE=1 SV=2	0	42	3	34	3	81	9	738	34	3	0	1.242	0.649925	2.98	1.242	0.935	1.267
High	Master Protein	Q9D1M0	Protein SEC13 homolog OS=Mus musculus GN=Sec13 PE=1 SV=3	0	46	10	126	10	322	35.5	1769	126	10	0	1.242	0.698658	4.11	1.242	1.196	1.276
High	Master Protein	Q8R3L2	Transcription factor 25 OS=Mus musculus GN=Tcf25 PE=1 SV=2	0	9	5	14	5	676	76.6	167	14	5	0	1.241	0.879381	8.94	1.241	1.316	0.97
High	Master Protein	G3UX50	Death domain-associated protein 6 OS=Mus musculus GN=Daxx PE=1 SV=1	0	12	5	21	5	702	77.2	136	21	5	0	1.176	0.845223	8.19	1.241	1.176	1.004
High	Master Protein	Q9Z1N5	Spliceosome RNA helicase Ddx39b OS=Mus musculus GN=Ddx39b PE=1 SV=1	0	71	29	595	15	428	49	14443	595	29	16	1.17	0.549819	8.89	1.241	1.17	1.012
High	Master Protein	Q8CBW3	Abl interactor 1 OS=Mus musculus GN=Abi1 PE=1 SV=3	0	31	13	126	9	481	52.3	1346	126	13	5	1.004	0.984017	16.62	1.241	0.891	1.004
High	Master Protein	P62918	60S ribosomal protein L8 OS=Mus musculus GN=Rpl8 PE=1 SV=2	0	63	16	234	16	257	28	4239	234	16	0	1.206	0.39557	4.21	1.24	1.092	1.206
High	Master Protein	P62264	40S ribosomal protein S14 OS=Mus musculus GN=Rps14 PE=1 SV=3	0	66	6	39	6	151	16.3	1039	39	6	0	1.135	0.824196	3.64	1.24	1.108	1.135
High	Master Protein	Q8K124	Pleckstrin homology domain-containing family O member 2 OS=Mus musculus GN=Plekho2 PE=1 SV=1	0	32	9	60	9	495	53.8	860	60	9	0	0.888	0.766262	7.48	1.24	0.888	0.845
High	Master Protein	Q6KAU4	Multivesicular body subunit 12B OS=Mus musculus GN=Mvb12b PE=1 SV=2	0	15	2	5	2	317	35.4	76	5	2	0	1.239	0.922536	4.17	1.239	0.854	1.274
High	Master Protein	P50428	Arylsulfatase A OS=Mus musculus GN=Arsa PE=1 SV=2	0	9	2	29	2	506	53.7	81	29	2	0	1.239	0.945863	26.95	1.239	1.014	1.858
High	Master Protein	O70299	Putative nucleotidyltransferase MAB21L1 OS=Mus musculus GN=Mab21l1 PE=2 SV=1	0	24	8	64	8	359	40.9	998	64	8	0	1.239	0.614534	3.03	1.239	1.214	1.486
High	Master Protein	D3Z417	G/T mismatch-specific thymine DNA glycosylase (Fragment) OS=Mus musculus GN=Tdg PE=1 SV=1	0	18	2	13	2	186	20.5	162	13	2	0	1.187	0.975388	2.01	1.239	1.171	1.187
High	Master Protein	Q99KH8	Serine/threonine-protein kinase 24 OS=Mus musculus GN=Stk24 PE=1 SV=1	0	26	8	31	6	431	47.9	331	31	8	1	1.239	0.628368	13.61	1.239	1.352	0.924
High	Master Protein	Q62426	Cystatin-B OS=Mus musculus GN=Cstb PE=1 SV=1	0	67	5	88	5	98	11	1145	88	5	0	1.278	0.583758	4.63	1.238	1.278	1.648
High	Master Protein	Q9CQ60	6-phosphogluconolactonase OS=Mus musculus GN=Pgls PE=1 SV=1	0	42	8	55	8	257	27.2	1006	55	8	0	1.238	0.635849	7.89	1.238	1.172	1.865
High	Master Protein	J3QNT7	Epsin-2 OS=Mus musculus GN=Epn2 PE=1 SV=1	0	8	4	16	4	640	68.3	164	16	4	0	1.178	0.897568	7.55	1.238	0.799	1.178
High	Master Protein	P35822	Receptor-type tyrosine-protein phosphatase kappa OS=Mus musculus GN=Ptprk PE=1 SV=1	0	13	11	27	10	1457	164.1	475	27	11	1	1.238	0.65627	7.57	1.238	0.863	1.301
High	Master Protein	P26043	Radixin OS=Mus musculus GN=Rdx PE=1 SV=3	0	42	21	226	10	583	68.5	3899	226	21	0	1.156	0.89205	4.12	1.238	1.124	1.156
High	Master Protein	Q91V64	Isochorismatase domain-containing protein 1 OS=Mus musculus GN=Isoc1 PE=1 SV=1	0	25	5	35	5	297	32	825	35	5	0	1.238	0.667994	20.08	1.238	1.07	1.95
High	Master Protein	P49962	Signal recognition particle 9 kDa protein OS=Mus musculus GN=Srp9 PE=1 SV=2	0	30	4	28	4	86	10.2	211	28	4	0	1.041	0.998622	28.02	1.238	1.041	0.744
High	Master Protein	Q9CZ42	ATP-dependent (S)-NAD(P)H-hydrate dehydratase OS=Mus musculus GN=Naxd PE=1 SV=1	0	59	13	72	13	343	36.7	1219	72	13	0	1.238	0.728053	26.7	1.238	0.987	1.46
High	Master Protein	Q62189	U1 small nuclear ribonucleoprotein A OS=Mus musculus GN=Snrpa PE=1 SV=3	0	39	10	167	7	287	31.8	3122	167	10	4	1.127	0.841897	14.46	1.237	1.127	0.933
High	Master Protein	Q06138	Calcium-binding protein 39 OS=Mus musculus GN=Cab39 PE=1 SV=2	0	35	11	52	8	341	39.8	423	52	11	2	1.237	0.657628	14.75	1.237	1.36	0.868
High	Master Protein	Q9DCH4	Eukaryotic translation initiation factor 3 subunit F OS=Mus musculus GN=Eif3f PE=1 SV=2	0	33	10	77	10	361	38	1175	77	10	0	1.237	0.640384	0.92	1.237	1.245	1.195
High	Master Protein	D3Z4J9	Echinoderm microtubule-associated protein-like 1 OS=Mus musculus GN=Eml1 PE=1 SV=1	0	15	6	20	6	800	88.3	147	20	6	0	1.237	0.810192	1.18	1.237	1.436	1.227
High	Master Protein	P48024	Eukaryotic translation initiation factor 1 OS=Mus musculus GN=Eif1 PE=1 SV=2	0	76	7	78	2	113	12.7	2510	78	7	5	1.168	0.82023	8.61	1.236	1.168	0.892
High	Master Protein	Q9CQU0	Thioredoxin domain-containing protein 12 OS=Mus musculus GN=Txndc12 PE=1 SV=1	0	59	6	69	6	170	19	1630	69	6	0	1.236	0.703153	12.6	1.236	1.131	1.519
High	Master Protein	Q3TVK3	Aspartyl aminopeptidase OS=Mus musculus GN=Dnpep PE=1 SV=1	0	70	21	243	21	475	52.4	4841	243	21	0	1.236	0.302195	13.93	1.236	1.097	1.352
High	Master Protein	Q8VE80	THO complex subunit 3 OS=Mus musculus GN=Thoc3 PE=2 SV=1	0	38	10	72	10	351	38.7	908	72	10	0	0.953	0.94662	23.15	1.236	0.824	0.953
High	Master Protein	Q8VDD5	Myosin-9 OS=Mus musculus GN=Myh9 PE=1 SV=4	0	52	92	892	65	1960	226.2	22033	892	92	28	1.236	0.283183	14.97	1.236	1.36	1.104
High	Master Protein	Q9CPT4	Myeloid-derived growth factor OS=Mus musculus GN=Mydgf PE=1 SV=1	0	16	3	41	3	166	18	501	41	3	0	1.236	0.603187	14.92	1.236	1.111	1.52
High	Master Protein	Q66JX5	FGFR1 oncogene partner OS=Mus musculus GN=Fgfr1op PE=1 SV=1	0	16	4	6	4	399	42.7	113	6	4	0	0.877	0.9013	43.05	1.236	0.877	0.51
High	Master Protein	Q5SUH7	Clathrin interactor 1 OS=Mus musculus GN=Clint1 PE=1 SV=1	0	19	9	88	9	623	67.7	1384	88	9	0	0.983	0.95823	5.47	1.235	0.948	0.983
High	Master Protein	Q80YR4	E3 ubiquitin-protein ligase ZNF598 OS=Mus musculus GN=Znf598 PE=1 SV=1	0	8	5	12	5	908	99.1	155	12	5	0	1.197	0.955139	4.72	1.235	1.197	1.068
High	Master Protein	Q8R3G1	Nuclear inhibitor of protein phosphatase 1 OS=Mus musculus GN=Ppp1r8 PE=1 SV=1	0	42	9	41	9	351	38.5	429	41	9	0	1.01	0.993902	5.83	1.235	0.97	1.01
High	Master Protein	P54923	[Protein ADP-ribosylarginine] hydrolase OS=Mus musculus GN=Adprh PE=1 SV=1	0	51	13	53	13	362	40	535	53	13	0	1.235	0.734713	13.57	1.235	1.122	1.653
High	Master Protein	O89050	Muskelin OS=Mus musculus GN=Mkln1 PE=1 SV=1	0	5	3	10	3	735	84.8	78	10	3	0	0.885	0.942583	19.48	1.234	0.782	0.885
High	Master Protein	Q9CYG7	Mitochondrial import receptor subunit TOM34 OS=Mus musculus GN=Tomm34 PE=1 SV=1	0	21	6	25	6	309	34.3	171	25	6	0	1.234	0.772727	17.04	1.234	1.092	1.439
High	Master Protein	P16014	Secretogranin-1 OS=Mus musculus GN=Chgb PE=1 SV=2	0	15	7	48	7	677	77.9	365	48	7	0	1.234	0.808238	45.54	1.234	0.855	1.87
High	Master Protein	A0A1L1SQ51	Talin-2 OS=Mus musculus GN=Tln2 PE=1 SV=1	0	53	88	462	79	2544	271.8	10827	462	88	8	1.126	0.747266	10.1	1.234	1.05	1.126
High	Master Protein	E9PY16	ArfGAP with dual PH domains 1 OS=Mus musculus GN=Adap1 PE=1 SV=1	0	18	4	8	4	374	43.3	75	8	4	0	1.234	0.931388	29.09	1.234	1.476	0.583
High	Master Protein	P58404	Striatin-4 OS=Mus musculus GN=Strn4 PE=1 SV=2	0	33	15	68	13	760	81.6	809	68	15	0	1.083	0.984017	9.58	1.234	1.083	1.013
High	Master Protein	Q6URW6	Myosin-14 OS=Mus musculus GN=Myh14 PE=1 SV=1	0	42	70	408	24	2000	228.4	9616	408	70	35	1.06	0.955139	6.87	1.233	1.06	1.011
High	Master Protein	P62702	40S ribosomal protein S4, X isoform OS=Mus musculus GN=Rps4x PE=1 SV=2	0	70	20	329	20	263	29.6	8227	329	20	0	1.233	0.292699	2.89	1.233	1.257	0.922
High	Master Protein	P26231	Catenin alpha-1 OS=Mus musculus GN=Ctnna1 PE=1 SV=1	0	57	38	399	27	906	100	10600	399	38	10	1.196	0.436276	4.57	1.233	1.067	1.196
High	Master Protein	Q9CPS5	26S proteasome non-ATPase regulatory subunit 8 OS=Mus musculus GN=Psmd8 PE=1 SV=2	0	55	11	90	11	289	32.7	2232	90	11	0	1.232	0.720431	2.37	1.232	1.2	1.252
High	Master Protein	Q9WU78	Programmed cell death 6-interacting protein OS=Mus musculus GN=Pdcd6ip PE=1 SV=3	0	36	22	109	22	869	96	1259	109	22	0	1.198	0.707183	4.23	1.232	0.993	1.198
High	Master Protein	Q8BVU0	Leucine-rich repeat and calponin homology domain-containing protein 3 OS=Mus musculus GN=Lrch3 PE=1 SV=3	0	11	4	16	4	778	86.3	50	16	4	0	1.232	0.890391	11.12	1.232	1.497	1.14
High	Master Protein	Q3TQI7	Uncharacterized protein C9orf78 homolog OS=Mus musculus PE=1 SV=2	0	25	4	18	4	289	33.5	138	18	4	0	1.232	0.689208	24.34	1.232	1.434	0.833
High	Master Protein	O89023	Tripeptidyl-peptidase 1 OS=Mus musculus GN=Tpp1 PE=1 SV=2	0	18	6	40	6	562	61.3	1092	40	6	0	0.85	0.318277	45.91	1.232	0.85	0.595
High	Master Protein	Q62348	Translin OS=Mus musculus GN=Tsn PE=1 SV=1	0	49	9	257	9	228	26.2	3590	257	9	0	1.227	0.309883	0.49	1.231	1.072	1.227
High	Master Protein	P00493	Hypoxanthine-guanine phosphoribosyltransferase OS=Mus musculus GN=Hprt1 PE=1 SV=3	0	81	14	411	14	218	24.6	11167	411	14	0	1.154	0.623666	9.2	1.231	1.083	1.154
High	Master Protein	P53395	Lipoamide acyltransferase component of branched-chain alpha-keto acid dehydrogenase complex, mitochondrial OS=Mus musculus GN=Dbt PE=1 SV=2	0	35	11	89	11	482	53.2	1361	89	11	0	1.2	0.734991	3.82	1.231	0.986	1.2
High	Master Protein	P11881	Inositol 1,4,5-trisphosphate receptor type 1 OS=Mus musculus GN=Itpr1 PE=1 SV=2	0	5	9	17	6	2749	313	194	17	9	0	1.017	0.999996	15.98	1.23	0.907	1.017
High	Master Protein	A0A0R3P9D0	Phospholipid phosphatase-related protein type 3 OS=Mus musculus GN=Plppr3 PE=1 SV=1	0	4	2	6	2	716	76.7	177	6	2	0	1.23	0.894632	11.37	1.23	1.324	1.009
High	Master Protein	Q8BGC0	HIV Tat-specific factor 1 homolog OS=Mus musculus GN=Htatsf1 PE=1 SV=1	0	34	23	131	23	757	86.2	1631	131	23	0	1.23	0.651597	2.9	1.23	1.254	0.999
High	Master Protein	E9PXB7	E3 ubiquitin-protein ligase NEDD4-like OS=Mus musculus GN=Nedd4l PE=1 SV=1	0	13	9	48	7	976	112.2	353	48	9	0	1.23	0.790779	9.63	1.23	1	1.31
High	Master Protein	Q7TSJ7	Mitogen-activated protein kinase OS=Mus musculus GN=Mapk8 PE=1 SV=1	0	34	9	50	3	427	48.4	216	50	9	0	0.907	0.750007	35.75	1.23	0.907	0.731
High	Master Protein	Q8R3W2	MCG6979, isoform CRA_a OS=Mus musculus GN=0610009B22Rik PE=2 SV=1	0	19	2	6	2	140	16.4	194	6	2	0	1.194	0.868786	4.39	1.23	1.194	1.136
High	Master Protein	Q8BQZ4	Ral GTPase-activating protein subunit beta OS=Mus musculus GN=Ralgapb PE=1 SV=2	0	15	15	62	15	1484	165.1	444	62	15	0	0.919	0.884023	1.17	1.229	0.919	0.912
High	Master Protein	Q8VHE0	Translocation protein SEC63 homolog OS=Mus musculus GN=Sec63 PE=1 SV=4	0	19	11	25	11	760	87.8	176	25	11	0	1.199	0.789296	3.76	1.229	1.199	1.159
High	Master Protein	Q3TDD9	Protein phosphatase 1 regulatory subunit 21 OS=Mus musculus GN=Ppp1r21 PE=1 SV=2	0	23	12	32	12	780	88.3	1060	32	12	0	1.229	0.644069	9.91	1.229	1.311	0.936
High	Master Protein	Q9QYJ3	DnaJ homolog subfamily B member 1 OS=Mus musculus GN=Dnajb1 PE=1 SV=3	0	29	8	57	7	340	38.1	578	57	8	0	1.229	0.657444	3.81	1.229	1.27	1.198
High	Master Protein	O88951	Protein lin-7 homolog B OS=Mus musculus GN=Lin7b PE=1 SV=2	0	41	8	177	4	207	22.9	5997	177	8	0	1.014	0.988622	30.96	1.229	1.014	0.802
High	Master Protein	Q8K3Z9	Nuclear envelope pore membrane protein POM 121 OS=Mus musculus GN=Pom121 PE=1 SV=2	0	6	4	42	4	1200	120.9	543	42	4	0	1.122	0.967517	14.08	1.229	1.122	0.882
High	Master Protein	Q9JK83	Partitioning defective 6 homolog beta OS=Mus musculus GN=Pard6b PE=1 SV=2	0	17	4	19	4	371	41	240	19	4	0	1.24	0.812763	1.32	1.229	1.571	1.24
High	Master Protein	P06745	Glucose-6-phosphate isomerase OS=Mus musculus GN=Gpi PE=1 SV=4	0	67	33	1571	33	558	62.7	36494	1571	33	0	1.229	0.307251	17.92	1.229	1.007	1.377
High	Master Protein	Q8BSH9	Nucleosome assembly protein 1-like 1 OS=Mus musculus GN=Nap1l1 PE=1 SV=1	0	46	11	258	9	383	44.6	6185	258	11	0	1.094	0.961937	18.22	1.228	0.919	1.094
High	Master Protein	P62774	Myotrophin OS=Mus musculus GN=Mtpn PE=1 SV=2	0	44	4	47	4	118	12.9	943	47	4	0	1.251	0.613754	2.71	1.228	1.251	1.364
High	Master Protein	Q9CQB5	CDGSH iron-sulfur domain-containing protein 2 OS=Mus musculus GN=Cisd2 PE=1 SV=1	0	41	5	36	5	135	15.2	563	36	5	0	0.939	0.857464	11.72	1.228	0.87	0.939
High	Master Protein	A0A087WNX7	Snf2-related CREBBP activator protein OS=Mus musculus GN=Srcap PE=1 SV=1	0	1	3	10	2	3114	333.4	132	10	3	0	1.017	0.993902	21.53	1.228	0.869	1.017
High	Master Protein	A0A1B0GRU3	Zinc finger CCCH domain-containing protein 4 OS=Mus musculus GN=Zc3h4 PE=1 SV=1	0	17	12	73	12	1180	127.4	1833	73	12	0	1.228	0.746214	2.21	1.228	1.246	1.101
High	Master Protein	E9Q411	Neuroblastoma-amplified sequence OS=Mus musculus GN=Nbas PE=1 SV=1	0	8	11	34	11	2356	265.6	325	34	11	0	1.227	0.818267	25.61	1.227	1.542	1.015
High	Master Protein	Q9WUA6	RAC-gamma serine/threonine-protein kinase OS=Mus musculus GN=Akt3 PE=1 SV=1	0	14	4	11	4	479	55.7	86	11	4	0	1.249	0.746214	2.54	1.227	1.249	1.647
High	Master Protein	E9QNT5	Transcription initiation factor TFIID subunit 12 OS=Mus musculus GN=Taf12 PE=1 SV=1	0.002	13	2	5	2	213	23.5	71	5	2	0	1.227	0.955139	13.84	1.227	1.786	1.112
High	Master Protein	F8WHG5	RAC-beta serine/threonine-protein kinase OS=Mus musculus GN=Akt2 PE=1 SV=1	0	13	4	8	4	438	51	92	8	4	0	1.454	0.676573	15.84	1.227	1.454	1.61
High	Master Protein	Q08943	FACT complex subunit SSRP1 OS=Mus musculus GN=Ssrp1 PE=1 SV=2	0	29	14	148	14	708	80.8	1914	148	14	0	1.057	0.999849	23.73	1.226	1.057	0.674
High	Master Protein	Q91YH5	Atlastin-3 OS=Mus musculus GN=Atl3 PE=1 SV=1	0	34	13	58	12	541	60.5	918	58	13	0	1.226	0.649273	4.93	1.226	1.185	1.294
High	Master Protein	A2AD03	Rab proteins geranylgeranyltransferase component A 1 OS=Mus musculus GN=Chm PE=1 SV=1	0	9	3	7	3	662	73.6	92	7	3	0	1.201	0.954579	3.08	1.226	0.897	1.201
High	Master Protein	Q8R146	Acylamino-acid-releasing enzyme OS=Mus musculus GN=Apeh PE=1 SV=3	0	49	21	62	21	732	81.5	722	62	21	0	1.216	0.738252	1.19	1.226	0.909	1.216
High	Master Protein	Q61249	Immunoglobulin-binding protein 1 OS=Mus musculus GN=Igbp1 PE=1 SV=1	0	28	7	26	7	340	38.9	475	26	7	0	1.225	0.677863	26.63	1.225	1.005	1.502
High	Master Protein	P29341	Polyadenylate-binding protein 1 OS=Mus musculus GN=Pabpc1 PE=1 SV=2	0	61	31	491	11	636	70.6	11661	491	31	21	0.961	0.975332	3.29	1.225	0.94	0.961
High	Master Protein	Q8K5B2	Multiple coagulation factor deficiency protein 2 homolog OS=Mus musculus GN=Mcfd2 PE=1 SV=1	0	50	3	87	3	145	16.2	830	87	3	0	1.225	0.624211	35.91	1.225	0.928	1.521
High	Master Protein	Q9R0Y5	Adenylate kinase isoenzyme 1 OS=Mus musculus GN=Ak1 PE=1 SV=1	0	48	7	57	7	194	21.5	1512	57	7	0	1.286	0.433961	7.1	1.224	1.286	1.617
High	Master Protein	Q3TJZ6	Protein FAM98A OS=Mus musculus GN=Fam98a PE=1 SV=1	0	21	8	95	5	515	55	1362	95	8	0	1.224	0.774736	5.51	1.224	1.297	1.178
High	Master Protein	G3X928	SEC23-interacting protein OS=Mus musculus GN=Sec23ip PE=1 SV=1	0	33	24	170	23	998	110.7	2669	170	24	1	1.224	0.716869	2.51	1.224	1.141	1.244
High	Master Protein	Q9D832	DnaJ homolog subfamily B member 4 OS=Mus musculus GN=Dnajb4 PE=1 SV=1	0	34	9	51	8	337	37.8	811	51	9	1	1.223	0.699548	16.27	1.223	0.982	1.358
High	Master Protein	F6SJM7	Fucose mutarotase (Fragment) OS=Mus musculus GN=Fuom PE=1 SV=1	0	35	4	29	4	156	17.3	721	29	4	0	1.074	0.990823	15.96	1.223	1.074	0.958
High	Master Protein	Q4VAA2	Protein CDV3 OS=Mus musculus GN=Cdv3 PE=1 SV=2	0	25	3	24	3	281	29.7	433	24	3	0	1.2	0.73931	2.92	1.223	1.116	1.2
High	Master Protein	Q8R3X6	Glypican-6 OS=Mus musculus GN=Gpc6 PE=1 SV=1	0	16	5	13	5	565	64.3	362	13	5	0	1.223	0.847089	6.21	1.223	1.047	1.274
High	Master Protein	Q99L20	Glutathione S-transferase theta-3 OS=Mus musculus GN=Gstt3 PE=1 SV=1	0	53	10	83	9	241	27.4	1277	83	10	1	1.353	0.388017	2.76	1.222	1.353	1.378
High	Master Protein	Q99M31	Heat shock 70 kDa protein 14 OS=Mus musculus GN=Hspa14 PE=1 SV=2	0	13	5	12	5	509	54.6	199	12	5	0	0.837	0.774632	6.2	1.222	0.837	0.804
High	Master Protein	Q80VQ1	Leucine-rich repeat-containing protein 1 OS=Mus musculus GN=Lrrc1 PE=1 SV=2	0	14	5	28	4	524	59.4	522	28	5	0	1.222	0.957782	14.61	1.222	0.776	1.343
High	Master Protein	Q99LX0	Protein DJ-1 OS=Mus musculus GN=Park7 PE=1 SV=1	0	72	14	522	14	189	20	14598	522	14	0	1.222	0.330076	4.05	1.222	0.978	1.256
High	Master Protein	Q3TFD2	Lysophosphatidylcholine acyltransferase 1 OS=Mus musculus GN=Lpcat1 PE=1 SV=1	0	22	8	39	8	534	59.7	364	39	8	0	1.228	0.738944	0.72	1.222	1.425	1.228
High	Master Protein	Q9Z0P4	Paralemmin-1 OS=Mus musculus GN=Palm PE=1 SV=1	0	68	15	215	9	383	41.6	4246	215	15	5	0.986	0.985166	0.4	1.222	0.984	0.986
High	Master Protein	Q62283	Tetraspanin-7 OS=Mus musculus GN=Tspan7 PE=1 SV=2	0	6	1	8	1	249	27.5	487	8	1	0	1.049	0.993902	11.25	1.222	1.049	0.969
High	Master Protein	Q80U30	Protein CLEC16A OS=Mus musculus GN=Clec16a PE=1 SV=2	0	5	4	23	4	1036	116.2	162	23	4	0	1.192	0.772991	3.71	1.222	1.192	1.053
High	Master Protein	Q8VDM4	26S proteasome non-ATPase regulatory subunit 2 OS=Mus musculus GN=Psmd2 PE=1 SV=1	0	41	30	277	30	908	100.1	5702	277	30	0	1.222	0.324242	2.05	1.222	1.11	1.238
High	Master Protein	Q3TCJ1	BRISC complex subunit Abraxas 2 OS=Mus musculus GN=Abraxas2 PE=1 SV=1	0	8	3	9	3	415	46.9	82	9	3	0	1.28	0.892893	4.11	1.221	1.28	1.316
High	Master Protein	P60229	Eukaryotic translation initiation factor 3 subunit E OS=Mus musculus GN=Eif3e PE=1 SV=1	0	41	15	98	15	445	52.2	1455	98	15	0	1.22	0.716782	0.15	1.221	1.22	0.836
High	Master Protein	Q7TQD2	Tubulin polymerization-promoting protein OS=Mus musculus GN=Tppp PE=1 SV=1	0	42	9	81	9	218	23.6	1176	81	9	0	1.114	0.914861	11.92	1.221	1.024	1.114
High	Master Protein	G8JL68	Myelin expression factor 2 (Fragment) OS=Mus musculus GN=Myef2 PE=1 SV=1	0	66	29	434	2	530	57.1	6207	434	29	0	1.221	0.756396	7.08	1.221	1.162	1.296
High	Master Protein	Q8BWU8	Ethanolamine-phosphate phospho-lyase OS=Mus musculus GN=Etnppl PE=2 SV=1	0	28	9	106	9	499	55.5	1297	106	9	0	0.995	0.984173	27.31	1.22	0.776	0.995
High	Master Protein	Q9D394	Protein RUFY3 OS=Mus musculus GN=Rufy3 PE=1 SV=1	0	51	21	123	3	469	53	2398	123	21	0	1.22	0.715584	20.75	1.22	1.39	1.041
High	Master Protein	A0A0R4J1E2	Elongation factor 1-delta OS=Mus musculus GN=Eef1d PE=1 SV=1	0	42	22	150	1	660	72.9	3506	150	22	22	1.192	0.472319	3.41	1.22	1.11	1.192
High	Master Protein	Q8C8N2	Protein SCAI OS=Mus musculus GN=Scai PE=1 SV=2	0	22	12	80	12	606	70.2	1118	80	12	0	1.202	0.743734	0.8	1.219	1.202	1.196
High	Master Protein	V9GWU2	Transcription factor 12 (Fragment) OS=Mus musculus GN=Tcf12 PE=1 SV=1	0	13	4	17	4	666	71.8	193	17	4	0	1.219	0.932519	1.42	1.219	1.197	1.231
High	Master Protein	Q9D358	Low molecular weight phosphotyrosine protein phosphatase OS=Mus musculus GN=Acp1 PE=1 SV=3	0	53	5	23	1	158	18.2	563	23	5	4	1.219	0.701536	29.55	1.219	0.976	1.485
High	Master Protein	Q6P6I6	DNA-directed RNA polymerase II subunit GRINL1A OS=Mus musculus GN=Polr2m PE=2 SV=2	0	10	2	7	1	366	41.2	163	7	2	0	1.129	0.981178	11.8	1.219	0.993	1.129
High	Master Protein	Q9DBB8	Trans-1,2-dihydrobenzene-1,2-diol dehydrogenase OS=Mus musculus GN=Dhdh PE=1 SV=1	0	28	7	33	4	333	36.3	904	33	7	3	1.219	0.769969	39.97	1.219	0.89	1.721
High	Master Protein	Q9Z108	Double-stranded RNA-binding protein Staufen homolog 1 OS=Mus musculus GN=Stau1 PE=1 SV=1	0	44	12	88	12	487	53.9	874	88	12	0	1.096	0.976363	16.59	1.218	1.096	0.951
High	Master Protein	P62270	40S ribosomal protein S18 OS=Mus musculus GN=Rps18 PE=1 SV=3	0	61	13	184	13	152	17.7	1413	184	13	0	1.208	0.411978	1.31	1.218	1.208	1.126
High	Master Protein	Q8VEA4	Mitochondrial intermembrane space import and assembly protein 40 OS=Mus musculus GN=Chchd4 PE=1 SV=1	0	42	4	44	4	139	15.5	210	44	4	0	1.124	0.942863	12.51	1.218	0.864	1.124
High	Master Protein	F8VQD7	Receptor-type tyrosine-protein phosphatase gamma OS=Mus musculus GN=Ptprg PE=1 SV=1	0	8	6	24	6	1442	161.2	119	24	6	0	1.316	0.651597	11.06	1.218	1.316	1.57
High	Master Protein	Q61553	Fascin OS=Mus musculus GN=Fscn1 PE=1 SV=4	0	58	27	281	27	493	54.5	4755	281	27	0	1.218	0.360356	22.02	1.218	0.973	1.399
High	Master Protein	Q9CQ45	Neudesin OS=Mus musculus GN=Nenf PE=1 SV=1	0	46	5	14	5	171	18.9	153	14	5	0	1.243	0.640384	2.92	1.218	1.5	1.243
High	Master Protein	E9PWW9	Remodeling and spacing factor 1 OS=Mus musculus GN=Rsf1 PE=1 SV=2	0	15	18	60	18	1441	161.7	1052	60	18	0	0.959	0.94007	28.09	1.218	0.959	0.806
High	Master Protein	Q91XH5	Sepiapterin reductase OS=Mus musculus GN=Spr PE=1 SV=1	0	70	14	81	14	262	27.9	3131	81	14	0	1.217	0.739659	33.48	1.217	0.82	1.492
High	Master Protein	Q925J9	Mediator of RNA polymerase II transcription subunit 1 OS=Mus musculus GN=Med1 PE=1 SV=2	0	5	4	19	4	1575	167	63	19	4	0	1.217	0.967276	24.43	1.217	1.905	1.017
High	Master Protein	Q924M7	Mannose-6-phosphate isomerase OS=Mus musculus GN=Mpi PE=1 SV=1	0	35	8	29	8	423	46.5	546	29	8	0	1.217	0.720255	14.19	1.217	1.101	1.58
High	Master Protein	A0A0R4J1J1	MCG114807, isoform CRA_c OS=Mus musculus GN=Pnkd PE=1 SV=1	0	31	3	14	2	142	15.6	116	14	3	0	1.035	0.999996	21.12	1.217	0.887	1.035
High	Master Protein	Q61205	Platelet-activating factor acetylhydrolase IB subunit gamma OS=Mus musculus GN=Pafah1b3 PE=1 SV=1	0	53	8	75	8	232	25.8	1113	75	8	0	1.217	0.767254	23.16	1.217	1.027	1.471
High	Master Protein	O55142	60S ribosomal protein L35a OS=Mus musculus GN=Rpl35a PE=1 SV=2	0	62	11	131	11	110	12.5	1966	131	11	0	1.146	0.792924	8.09	1.217	1.146	1.083
High	Master Protein	Q8BJ03	Cytochrome c oxidase assembly protein COX15 homolog OS=Mus musculus GN=Cox15 PE=1 SV=1	0	13	4	7	4	413	45.8	102	7	4	0	0.854	0.644196	12.25	1.217	0.789	0.854
High	Master Protein	Q8BK63	Casein kinase I isoform alpha OS=Mus musculus GN=Csnk1a1 PE=1 SV=2	0	36	10	65	2	337	38.9	793	65	10	8	1.216	0.717183	26.75	1.216	1.436	0.772
High	Master Protein	P24369	Peptidyl-prolyl cis-trans isomerase B OS=Mus musculus GN=Ppib PE=1 SV=2	0	58	12	201	11	216	23.7	4191	201	12	0	1.068	0.957183	7.59	1.216	1.014	1.068
High	Master Protein	Q9JJR8	Transmembrane protein 9B OS=Mus musculus GN=Tmem9b PE=1 SV=1	0	27	3	21	3	199	22.6	147	21	3	0	1.216	0.742944	1.89	1.216	0.931	1.232
High	Master Protein	A0A1B0GQU8	60S ribosomal protein L18 OS=Mus musculus GN=Rpl18 PE=1 SV=1	0	42	9	59	9	159	18.1	1734	59	9	0	1.216	0.525979	1.95	1.216	1.101	1.232
High	Master Protein	Q8R409	Protein HEXIM1 OS=Mus musculus GN=Hexim1 PE=1 SV=1	0	35	6	33	6	356	40.2	468	33	6	0	1.071	0.989059	10.98	1.216	0.992	1.071
High	Master Protein	Q810A7	ATP-dependent RNA helicase DDX42 OS=Mus musculus GN=Ddx42 PE=1 SV=3	0	34	22	180	22	929	101.9	3770	180	22	0	1.215	0.765921	9.69	1.215	1.295	0.974
High	Master Protein	H3BKQ7	Protein phosphatase 1, regulatory (inhibitor) subunit 9A OS=Mus musculus GN=Ppp1r9a PE=1 SV=1	0	25	15	45	14	955	107.1	662	45	15	0	1.015	0.995237	24.16	1.215	0.849	1.015
High	Master Protein	Q9D0F9	Phosphoglucomutase-1 OS=Mus musculus GN=Pgm1 PE=1 SV=4	0	60	27	268	27	562	61.4	5341	268	27	0	1.215	0.3757	18.91	1.215	1.06	1.421
High	Master Protein	P16254	Signal recognition particle 14 kDa protein OS=Mus musculus GN=Srp14 PE=1 SV=1	0	40	4	26	4	110	12.5	629	26	4	0	1.038	0.997037	25.34	1.215	1.038	0.735
High	Master Protein	Q8BYK6	YTH domain-containing family protein 3 OS=Mus musculus GN=Ythdf3 PE=1 SV=2	0	21	12	43	5	585	63.9	494	43	12	7	1.215	0.42642	13.36	1.215	1.328	1.105
High	Master Protein	P06801	NADP-dependent malic enzyme OS=Mus musculus GN=Me1 PE=1 SV=2	0	73	29	419	29	572	63.9	10197	419	29	0	1.162	0.609346	6.73	1.214	0.91	1.162
High	Master Protein	Q8BHE3	Caytaxin OS=Mus musculus GN=Atcay PE=1 SV=1	0	32	8	46	8	372	42.2	477	46	8	0	1.157	0.897462	7.37	1.214	1.157	1.095
High	Master Protein	A0A0R4J138	Arylsulfatase B OS=Mus musculus GN=Arsb PE=1 SV=1	0	11	5	14	5	534	59.7	194	14	5	0	1.214	0.840829	17.84	1.214	0.954	1.361
High	Master Protein	Q922Y1	UBX domain-containing protein 1 OS=Mus musculus GN=Ubxn1 PE=1 SV=1	0	41	7	45	7	297	33.6	167	45	7	0	1.214	0.712725	3.87	1.214	1.281	1.183
High	Master Protein	Q9D415	Disks large-associated protein 1 OS=Mus musculus GN=Dlgap1 PE=1 SV=3	0	9	7	29	3	992	110.3	223	29	7	4	1.17	0.940016	5.56	1.214	1.17	0.938
High	Master Protein	Q8K215	LYR motif-containing protein 4 OS=Mus musculus GN=Lyrm4 PE=1 SV=1	0	26	3	13	3	91	10.8	322	13	3	0	1.214	0.964628	12.41	1.214	1.329	1.112
High	Master Protein	Q923D2	Flavin reductase (NADPH) OS=Mus musculus GN=Blvrb PE=1 SV=3	0	21	5	20	5	206	22.2	276	20	5	0	1.093	0.975388	0.96	1.214	1.093	1.086
High	Master Protein	D3Z783	RAC-alpha serine/threonine-protein kinase OS=Mus musculus GN=Akt1 PE=1 SV=2	0	22	7	24	7	437	50.9	297	24	7	0	1.339	0.395781	13.91	1.213	1.339	1.98
High	Master Protein	A0A140LHQ8	Phosphatidylinositol-binding clathrin assembly protein (Fragment) OS=Mus musculus GN=Picalm PE=1 SV=1	0	31	9	42	1	531	57	981	42	9	0	1.017	0.993902	6.61	1.213	1.017	0.971
High	Master Protein	A0A0R4J0M1	Tubulin-specific Chaperone C OS=Mus musculus GN=Tbcc PE=1 SV=1	0	34	6	30	6	341	38.1	545	30	6	0	1.085	0.984558	17.49	1.213	0.533	1.085
High	Master Protein	Q9CWL8	Beta-catenin-like protein 1 OS=Mus musculus GN=Ctnnbl1 PE=1 SV=1	0	20	11	74	11	563	64.9	1265	74	11	0	1.213	0.73286	35.19	1.213	1.501	0.823
High	Master Protein	A0A1Y7VL28	tRNA (adenine(58)-N(1))-methyltransferase catalytic subunit TRMT61A (Fragment) OS=Mus musculus GN=Trmt61a PE=4 SV=1	0	35	4	30	4	171	18.9	412	30	4	0	1.098	0.983555	8.3	1.213	1.037	1.098
High	Master Protein	Q9JIX0	Transcription and mRNA export factor ENY2 OS=Mus musculus GN=Eny2 PE=1 SV=1	0	26	2	19	2	101	11.5	433	19	2	0	1.213	0.849957	4.67	1.213	1.251	0.954
High	Master Protein	Q80TM9	Nischarin OS=Mus musculus GN=Nisch PE=1 SV=2	0	13	13	103	13	1593	174.9	2210	103	13	0	1.212	0.717736	11.28	1.212	1.114	1.304
High	Master Protein	A0A1L1SQA8	40S ribosomal protein S25 OS=Mus musculus GN=Rps25 PE=1 SV=1	0	38	4	32	4	93	10.3	538	32	4	0	1.129	0.81513	10.91	1.212	1.129	0.838
High	Master Protein	Q8CH18	Cell division cycle and apoptosis regulator protein 1 OS=Mus musculus GN=Ccar1 PE=1 SV=1	0	25	23	265	23	1146	132	3705	265	23	0	1	0.976363	11.67	1.212	1	0.927
High	Master Protein	Q9CWF2	Tubulin beta-2B chain OS=Mus musculus GN=Tubb2b PE=1 SV=1	0	86	38	6732	1	445	49.9	184713	6732	38	0	1.211	0.7816	19.45	1.211	1.053	1.609
High	Master Protein	A0A1C7CYV0	Plastin-3 (Fragment) OS=Mus musculus GN=Pls3 PE=1 SV=1	0	24	11	33	8	629	70.6	523	33	11	3	1.211	0.720825	6.84	1.211	1.155	1.268
High	Master Protein	Q9Z2U0	Proteasome subunit alpha type-7 OS=Mus musculus GN=Psma7 PE=1 SV=1	0	57	11	163	11	248	27.8	4671	163	11	0	1.211	0.379447	0.77	1.211	1.086	1.217
High	Master Protein	Q9JK81	UPF0160 protein MYG1, mitochondrial OS=Mus musculus GN=Myg1 PE=1 SV=1	0	47	11	46	11	380	42.7	367	46	11	0	1.228	0.752578	2.04	1.211	1.228	1.606
High	Master Protein	Q99KF1	Transmembrane emp24 domain-containing protein 9 OS=Mus musculus GN=Tmed9 PE=1 SV=2	0	37	6	54	5	235	27.1	1300	54	6	0	1.211	0.703705	2.25	1.211	1.229	1.137
High	Master Protein	P54726	UV excision repair protein RAD23 homolog A OS=Mus musculus GN=Rad23a PE=1 SV=2	0	20	8	28	6	363	39.7	239	28	8	0	1.211	0.679968	4.84	1.211	1.25	1.027
High	Master Protein	J3QNM3	Protein enabled homolog OS=Mus musculus GN=Enah PE=1 SV=1	0	23	15	70	14	789	84.5	408	70	15	1	1.014	0.988622	26.01	1.21	1.014	0.836
High	Master Protein	Q8R127	Saccharopine dehydrogenase-like oxidoreductase OS=Mus musculus GN=Sccpdh PE=1 SV=1	0	62	15	154	15	429	47.1	3613	154	15	0	1.123	0.8789	2.55	1.21	1.123	1.103
High	Master Protein	Q9QYB2	Dachshund homolog 1 OS=Mus musculus GN=Dach1 PE=1 SV=1	0	9	4	32	4	751	77.9	308	32	4	0	1.282	0.692421	8.27	1.21	1.397	1.282
High	Master Protein	P09242	Alkaline phosphatase, tissue-nonspecific isozyme OS=Mus musculus GN=Alpl PE=1 SV=2	0	29	9	54	9	524	57.5	489	54	9	0	1.067	0.9873	17.45	1.21	1.067	0.942
High	Master Protein	Q3THE2	Myosin regulatory light chain 12B OS=Mus musculus GN=Myl12b PE=1 SV=2	0	66	13	135	1	172	19.8	3122	135	13	13	1.193	0.64755	2.15	1.21	1.193	1.07
High	Master Protein	Q8JZM7	Parafibromin OS=Mus musculus GN=Cdc73 PE=1 SV=1	0	21	8	38	8	531	60.5	351	38	8	0	1.014	0.994321	8.17	1.21	1.014	0.958
High	Master Protein	Q99LD9	Translation initiation factor eIF-2B subunit beta OS=Mus musculus GN=Eif2b2 PE=1 SV=1	0	24	7	36	7	351	38.9	280	36	7	0	1.254	0.573907	5.29	1.21	1.254	1.335
High	Master Protein	Q8BSN6	Vesicle-associated membrane protein 4 OS=Mus musculus GN=Vamp4 PE=1 SV=1	0	33	4	25	4	141	16.3	599	25	4	0	0.963	0.950293	30.26	1.209	0.963	0.63
High	Master Protein	Q8CJH3	Plexin-B1 OS=Mus musculus GN=Plxnb1 PE=1 SV=2	0	16	17	45	17	2119	231.2	565	45	17	0	1.209	0.716109	22.45	1.209	1.392	0.947
High	Master Protein	Q7TPR4	Alpha-actinin-1 OS=Mus musculus GN=Actn1 PE=1 SV=1	0	64	45	492	26	892	103	9552	492	45	1	1.143	0.884023	8.48	1.209	1.078	1.143
High	Master Protein	Q7TNS2	MICOS complex subunit Mic10 OS=Mus musculus GN=Minos1 PE=1 SV=1	0	67	4	31	4	76	8.6	421	31	4	0	1.209	0.790974	25.81	1.209	0.909	1.419
High	Master Protein	G3UYV7	40S ribosomal protein S28 (Fragment) OS=Mus musculus GN=Rps28 PE=1 SV=1	0	70	5	35	5	56	6.3	519	35	5	0	1.191	0.759901	2.21	1.209	1.019	1.191
High	Master Protein	Q9EP82	tRNA (guanine-N(7)-)-methyltransferase non-catalytic subunit WDR4 OS=Mus musculus GN=Wdr4 PE=1 SV=2	0	24	5	14	5	413	45.7	167	14	5	0	1.041	0.999849	23.79	1.209	1.041	0.51
High	Master Protein	Q8CGF6	WD repeat-containing protein 47 OS=Mus musculus GN=Wdr47 PE=1 SV=2	0	42	27	168	27	920	102.2	2231	168	27	0	1.138	0.910687	0.44	1.209	1.134	1.138
High	Master Protein	P17182	Alpha-enolase OS=Mus musculus GN=Eno1 PE=1 SV=3	0	80	34	8941	27	434	47.1	315431	8941	34	8	1.209	0.385852	16.89	1.209	1.06	1.346
High	Master Protein	H7BX88	Carnitine O-acetyltransferase OS=Mus musculus GN=Crat PE=1 SV=1	0	6	3	4	3	605	68.6	60	4	3	0	1.848	0.239799	6.11	1.208	1.924	1.848
High	Master Protein	Q8C0L8	Conserved oligomeric Golgi complex subunit 5 OS=Mus musculus GN=Cog5 PE=1 SV=3	0	15	8	31	8	829	91.3	434	31	8	0	1.109	0.976845	13.28	1.208	1.109	0.932
High	Master Protein	A2AL85	Aspartyl/asparaginyl beta-hydroxylase OS=Mus musculus GN=Asph PE=1 SV=1	0	26	12	138	12	725	81.4	4687	138	12	0	1.208	0.7816	11.98	1.208	1.451	1.11
High	Master Protein	D3Z6S7	Immunoglobulin superfamily member 11 OS=Mus musculus GN=Igsf11 PE=1 SV=1	0	15	3	8	3	369	39.9	100	8	3	0	1.208	0.867142	1.34	1.208	1.219	1.169
High	Master Protein	Q8R2T8	General transcription factor 3C polypeptide 5 OS=Mus musculus GN=Gtf3c5 PE=2 SV=2	0	36	14	97	14	520	60.5	781	97	14	0	1.148	0.927386	7.69	1.208	1.148	0.909
High	Master Protein	Q9R0N8	Synaptotagmin-6 OS=Mus musculus GN=Syt6 PE=1 SV=2	0	15	7	24	5	511	57.2	189	24	7	0	1.385	0.695289	16.18	1.207	1.537	1.385
High	Master Protein	P22315	Ferrochelatase, mitochondrial OS=Mus musculus GN=Fech PE=1 SV=2	0	51	14	98	14	420	47.1	1318	98	14	0	1.324	0.395277	3.53	1.207	1.355	1.324
High	Master Protein	Q99LI9	Polyribonucleotide 5'-hydroxyl-kinase Clp1 OS=Mus musculus GN=Clp1 PE=1 SV=1	0	4	2	15	2	425	47.7	210	15	2	0	1.207	0.962389	1.7	1.207	1.221	0.975
High	Master Protein	P19253	60S ribosomal protein L13a OS=Mus musculus GN=Rpl13a PE=1 SV=4	0	53	14	126	14	203	23.4	1540	126	14	0	1.207	0.525559	7.21	1.207	1.148	1.266
High	Master Protein	Q61644	Protein kinase C and casein kinase substrate in neurons protein 1 OS=Mus musculus GN=Pacsin1 PE=1 SV=1	0	72	26	442	25	441	50.5	9802	442	26	1	1.207	0.394071	19.2	1.207	0.989	1.363
High	Master Protein	Q3V117	ATP-citrate synthase OS=Mus musculus GN=Acly PE=1 SV=1	0	60	53	943	53	1101	120.7	19835	943	53	0	1.083	0.895524	5.44	1.206	1.083	1.044
High	Master Protein	Q80ZD3	Sodium-independent sulfate anion transporter OS=Mus musculus GN=Slc26a11 PE=2 SV=2	0.001	4	1	2	1	593	64.1	57	2	1	0	1.089	0.99717	16	1.206	0.688	1.089
High	Master Protein	Q9ES00	Ubiquitin conjugation factor E4 B OS=Mus musculus GN=Ube4b PE=1 SV=3	0	11	10	29	10	1173	133.2	340	29	10	0	1.128	0.916757	10.21	1.206	0.805	1.128
High	Master Protein	P98197	Probable phospholipid-transporting ATPase IH OS=Mus musculus GN=Atp11a PE=1 SV=1	0	7	5	24	4	1187	135.4	295	24	5	0	0.848	0.900708	44.02	1.206	0.642	0.848
High	Master Protein	Q8BRF7	Sec1 family domain-containing protein 1 OS=Mus musculus GN=Scfd1 PE=1 SV=1	0	44	16	99	16	639	72.3	1765	99	16	0	1.22	0.682652	0.84	1.206	1.22	1.227
High	Master Protein	Q9D0W5	Peptidyl-prolyl cis-trans isomerase-like 1 OS=Mus musculus GN=Ppil1 PE=1 SV=1	0	44	7	49	6	166	18.2	249	49	7	0	1.206	0.808238	40.54	1.206	1.789	0.876
High	Master Protein	B9EKI3	TATA element modulatory factor OS=Mus musculus GN=Tmf1 PE=1 SV=2	0	3	2	9	2	1091	121.7	98	9	2	0	1.065	0.999849	3.22	1.205	1.065	1.042
High	Master Protein	E9PUK6	Serine/arginine repetitive matrix protein 1 OS=Mus musculus GN=Srrm1 PE=1 SV=1	0	12	8	64	8	923	104.2	2201	64	8	0	1.169	0.896209	4.55	1.205	1.169	0.723
High	Master Protein	Q8CIN4	Serine/threonine-protein kinase PAK 2 OS=Mus musculus GN=Pak2 PE=1 SV=1	0	48	16	123	9	524	57.9	1666	123	16	6	1.205	0.720937	2.85	1.205	1.065	1.228
High	Master Protein	Q9CRC9	Glucosamine-6-phosphate isomerase 2 OS=Mus musculus GN=Gnpda2 PE=1 SV=1	0	58	10	63	8	276	31.1	770	63	10	2	1.205	0.725451	6.56	1.205	0.876	1.258
High	Master Protein	Q9D1I5	Methylmalonyl-CoA epimerase, mitochondrial OS=Mus musculus GN=Mcee PE=1 SV=1	0	35	3	18	3	178	19	190	18	3	0	1.252	0.747323	5.65	1.204	1.252	1.369
High	Master Protein	P48437	Prospero homeobox protein 1 OS=Mus musculus GN=Prox1 PE=1 SV=2	0	10	6	34	6	737	83.1	502	34	6	0	1.204	0.869748	9.59	1.204	1.466	1.126
High	Master Protein	Q45VK7	Cytoplasmic dynein 2 heavy chain 1 OS=Mus musculus GN=Dync2h1 PE=1 SV=1	0	9	24	66	24	4306	492	493	66	24	0	1.161	0.883777	5.42	1.204	1.161	1.036
High	Master Protein	Q5SWU9	Acetyl-CoA carboxylase 1 OS=Mus musculus GN=Acaca PE=1 SV=1	0	37	58	272	58	2345	265.1	3803	272	58	0	1.165	0.760577	4.96	1.204	1.119	1.165
High	Master Protein	B1AQW2	Microtubule-associated protein OS=Mus musculus GN=Mapt PE=1 SV=1	0	56	15	221	1	390	40.9	4244	221	15	0	1.204	0.800841	11.81	1.204	1.108	1.376
High	Master Protein	Q9Z0H8	CAP-Gly domain-containing linker protein 2 OS=Mus musculus GN=Clip2 PE=1 SV=2	0	26	18	54	15	1047	115.8	704	54	18	0	1.203	0.729826	8.27	1.203	1.27	1.06
High	Master Protein	E9PYF1	Aminopeptidase B OS=Mus musculus GN=Rnpep PE=1 SV=1	0	42	16	92	16	611	68	1643	92	16	0	1.203	0.736549	13.03	1.203	1.097	1.596
High	Master Protein	A0A0R4J049	Protein arginine N-methyltransferase 5 OS=Mus musculus GN=Prmt5 PE=1 SV=1	0	36	16	139	1	637	72.7	2439	139	16	17	1.203	0.802729	14.05	1.203	1.448	1.089
High	Master Protein	Q8BH69	Selenide, water dikinase 1 OS=Mus musculus GN=Sephs1 PE=1 SV=1	0	40	8	55	8	392	42.9	1101	55	8	0	1.233	0.667702	3.55	1.203	1.233	1.588
High	Master Protein	Q8VHL1	Histone-lysine N-methyltransferase SETD7 OS=Mus musculus GN=Setd7 PE=1 SV=2	0	19	4	35	4	366	40.5	625	35	4	0	1.203	0.766161	15.13	1.203	1.08	1.694
High	Master Protein	Q3TML0	Protein disulfide-isomerase A6 OS=Mus musculus GN=Pdia6 PE=1 SV=1	0	44	15	239	15	445	48.7	7511	239	15	0	1.203	0.42642	1.9	1.203	1.187	1.291
High	Master Protein	Q9DCM0	Persulfide dioxygenase ETHE1, mitochondrial OS=Mus musculus GN=Ethe1 PE=1 SV=2	0	32	6	22	6	254	27.7	269	22	6	0	1.203	0.749518	22.56	1.203	1.02	1.522
High	Master Protein	Q8CHW4	Translation initiation factor eIF-2B subunit epsilon OS=Mus musculus GN=Eif2b5 PE=1 SV=1	0	21	10	28	10	717	80	360	28	10	0	1.191	0.810391	1.31	1.202	1.191	0.76
High	Master Protein	Q8BG32	26S proteasome non-ATPase regulatory subunit 11 OS=Mus musculus GN=Psmd11 PE=1 SV=3	0	55	19	272	19	422	47.4	5383	272	19	0	1.202	0.548793	0.08	1.202	1.202	1.257
High	Master Protein	Q8K2F8	Protein LSM14 homolog A OS=Mus musculus GN=Lsm14a PE=1 SV=1	0	30	13	144	13	462	50.5	1161	144	13	0	1.051	0.999996	21.29	1.202	1.051	0.874
High	Master Protein	H3BKQ3	Ecotropic viral integration site 5-like OS=Mus musculus GN=Evi5l PE=1 SV=1	0	14	8	14	8	813	93.4	242	14	8	0	1.126	0.933429	9.95	1.201	1.126	0.77
High	Master Protein	P09055	Integrin beta-1 OS=Mus musculus GN=Itgb1 PE=1 SV=1	0	31	17	128	17	798	88.2	1856	128	17	0	1.105	0.974268	7.75	1.201	1.105	1.047
High	Master Protein	A2A860	WW domain binding protein 2, isoform CRA_a OS=Mus musculus GN=Wbp2 PE=1 SV=1	0	33	6	42	6	216	23.3	458	42	6	0	1.201	0.747144	29.54	1.201	0.962	1.447
High	Master Protein	Q61687	Transcriptional regulator ATRX OS=Mus musculus GN=Atrx PE=1 SV=3	0	15	26	157	21	2476	278.4	3927	157	26	5	1.053	0.999996	5.77	1.201	1.053	1.012
High	Master Protein	P17439	Glucosylceramidase OS=Mus musculus GN=Gba PE=1 SV=1	0	16	4	10	4	515	57.6	110	10	4	0	1.342	0.586341	15.54	1.201	1.342	1.672
High	Master Protein	Q3TAW3	Acyl-coenzyme A oxidase OS=Mus musculus GN=Acox3 PE=1 SV=1	0	9	4	15	4	673	75.3	371	15	4	0	1.201	0.930914	21.76	1.201	1.025	1.793
High	Master Protein	Q3ULB1	Testin OS=Mus musculus GN=Tes PE=1 SV=1	0	17	7	40	7	410	46.6	425	40	7	0	0.926	0.873214	33.9	1.201	0.926	0.627
High	Master Protein	Q8BUK6	Protein Hook homolog 3 OS=Mus musculus GN=Hook3 PE=1 SV=2	0	25	13	65	13	718	83.2	518	65	13	0	1.201	0.804247	19.26	1.201	1.482	1.045
High	Master Protein	O88685	26S proteasome regulatory subunit 6A OS=Mus musculus GN=Psmc3 PE=1 SV=2	0	50	18	206	6	442	49.5	4576	206	18	13	1.201	0.597324	7.19	1.201	1.111	1.259
High	Master Protein	Q64433	10 kDa heat shock protein, mitochondrial OS=Mus musculus GN=Hspe1 PE=1 SV=2	0	72	10	136	10	102	11	3169	136	10	0	1.2	0.417155	19.45	1.2	1.043	1.588
High	Master Protein	P55264	Adenosine kinase OS=Mus musculus GN=Adk PE=1 SV=2	0	26	7	58	7	361	40.1	1214	58	7	0	1.203	0.823822	0.26	1.2	1.203	1.498
High	Master Protein	O88544	COP9 signalosome complex subunit 4 OS=Mus musculus GN=Cops4 PE=1 SV=1	0	70	24	285	24	406	46.3	5849	285	24	0	1.054	0.976363	10.82	1.2	0.977	1.054
High	Master Protein	Q91VM5	RNA binding motif protein, X-linked-like-1 OS=Mus musculus GN=Rbmxl1 PE=1 SV=1	0	59	29	775	8	388	42.1	10170	775	29	0	1.153	0.804693	6.08	1.2	1.153	1.018
High	Master Protein	Q7TS64	Protein-serine/threonine kinase OS=Mus musculus GN=Grk2 PE=1 SV=1	0	13	6	26	6	647	75.1	250	26	6	0	1.402	0.465829	11.04	1.2	1.402	1.507
High	Master Protein	Q9CWJ9	Bifunctional purine biosynthesis protein PURH OS=Mus musculus GN=Atic PE=1 SV=2	0	40	16	107	16	592	64.2	2918	107	16	0	1.2	0.787267	21.42	1.2	1.027	1.479
High	Master Protein	Q9WUR2	Enoyl-CoA delta isomerase 2, mitochondrial OS=Mus musculus GN=Eci2 PE=1 SV=2	0	24	6	20	6	391	43.2	477	20	6	0	1.2	0.76902	26.56	1.2	0.795	1.415
High	Master Protein	Q9R1P4	Proteasome subunit alpha type-1 OS=Mus musculus GN=Psma1 PE=1 SV=1	0	81	18	310	18	263	29.5	5552	310	18	0	1.2	0.463212	18.27	1.2	1.052	1.487
High	Master Protein	Q3UC82	DNA ligase OS=Mus musculus GN=Lig3 PE=1 SV=1	0	6	5	10	5	1011	112.6	125	10	5	0	1.036	0.996172	23.35	1.2	1.036	0.76
High	Master Protein	Q9QX60	Deoxyguanosine kinase, mitochondrial OS=Mus musculus GN=Dguok PE=1 SV=3	0	12	2	23	2	277	32.3	372	23	2	0	1.2	0.772787	29.07	1.2	0.965	1.448
High	Master Protein	Q60963	Platelet-activating factor acetylhydrolase OS=Mus musculus GN=Pla2g7 PE=2 SV=2	0	7	2	7	2	440	49.2	127	7	2	0	0.923	0.969724	24.21	1.2	0.923	0.793
High	Master Protein	Q8R2R9	AP-3 complex subunit mu-2 OS=Mus musculus GN=Ap3m2 PE=1 SV=1	0	44	12	56	9	418	46.9	612	56	12	3	1.2	0.775539	11.11	1.2	1.591	1.11
High	Master Protein	Q61036	Serine/threonine-protein kinase PAK 3 OS=Mus musculus GN=Pak3 PE=1 SV=2	0	24	11	83	3	559	62.4	1439	83	11	3	0.999	0.9873	1.22	1.199	0.999	0.991
High	Master Protein	G3UZY2	Thioredoxin, mitochondrial (Fragment) OS=Mus musculus GN=Txn2 PE=1 SV=1	0	47	4	37	4	130	14.2	508	37	4	0	1.199	0.771926	2.31	1.199	1.18	1.567
High	Master Protein	Q921W2	Nucleolysin TIAR OS=Mus musculus GN=Tial1 PE=1 SV=1	0	42	10	92	1	375	41.5	1153	92	10	10	1.213	0.719686	1.66	1.199	1.213	1.314
High	Master Protein	Q6RI63	Constitutive coactivator of peroxisome proliferator-activated receptor gamma OS=Mus musculus GN=Fam120b PE=1 SV=1	0	7	4	20	4	786	89.3	103	20	4	0	0.924	0.956465	1.1	1.199	0.924	0.917
High	Master Protein	Q99ME2	WD repeat-containing protein 6 OS=Mus musculus GN=Wdr6 PE=1 SV=1	0	18	13	73	13	1125	121.8	663	73	13	0	1.199	0.751548	2.11	1.199	1.216	1.177
High	Master Protein	Q9D0M1	Phosphoribosyl pyrophosphate synthase-associated protein 1 OS=Mus musculus GN=Prpsap1 PE=1 SV=1	0	43	10	115	9	356	39.4	3183	115	10	0	1.064	0.993977	17.76	1.199	1.064	0.936
High	Master Protein	Q8BWR8	Rhophilin-2 OS=Mus musculus GN=Rhpn2 PE=1 SV=2	0	13	6	15	6	686	76.9	132	15	6	0	1.09	0.984409	2.88	1.198	1.069	1.09
High	Master Protein	Q8BFP9	[Pyruvate dehydrogenase (acetyl-transferring)] kinase isozyme 1, mitochondrial OS=Mus musculus GN=Pdk1 PE=1 SV=2	0	16	4	19	4	434	49	81	19	4	0	1.118	0.975388	10.7	1.198	0.97	1.118
High	Master Protein	Q69ZF7	Metal transporter CNNM4 OS=Mus musculus GN=Cnnm4 PE=1 SV=2	0	4	3	36	1	771	86.6	478	36	3	0	1	0.988622	3.4	1.198	1	0.977
High	Master Protein	Q80Y56	Rabenosyn-5 OS=Mus musculus GN=Rbsn PE=1 SV=1	0	11	5	14	5	783	88.4	265	14	5	0	1.198	0.858871	17.72	1.198	1.341	1.053
High	Master Protein	Q6P1I6	PH and SEC7 domain-containing protein 2 OS=Mus musculus GN=Psd2 PE=1 SV=1	0.001	3	2	6	2	770	84.2	88	6	2	0	1.198	0.979954	7.18	1.198	1.256	1.09
High	Master Protein	O08832	Polypeptide N-acetylgalactosaminyltransferase 4 OS=Mus musculus GN=Galnt4 PE=2 SV=1	0	14	6	24	6	578	66.5	99	24	6	0	1.382	0.729098	19.78	1.197	1.754	1.382
High	Master Protein	Q8VEF1	GRAM domain-containing protein 1A OS=Mus musculus GN=Gramd1a PE=1 SV=2	0	3	2	14	2	722	80.6	59	14	2	0	0.788	0.832768	3.74	1.197	0.788	0.769
High	Master Protein	A6H630	Protein-glutamate O-methyltransferase OS=Mus musculus GN=Armt1 PE=1 SV=1	0	25	7	46	7	439	50.5	733	46	7	0	1.197	0.762363	3.06	1.197	1.172	1.83
High	Master Protein	B2RXS4	Plexin-B2 OS=Mus musculus GN=Plxnb2 PE=1 SV=1	0	28	37	198	36	1842	206.1	4025	198	37	1	1.135	0.872111	8.04	1.197	1.051	1.135
High	Master Protein	Q8BTF8	RNA-binding Raly-like protein OS=Mus musculus GN=Ralyl PE=2 SV=1	0	10	4	14	2	293	32.4	227	14	4	0	1.579	0.519854	6.38	1.197	1.579	1.647
High	Master Protein	Q62523	Zyxin OS=Mus musculus GN=Zyx PE=1 SV=2	0	33	10	47	10	564	60.5	991	47	10	0	1.197	0.751718	1.08	1.197	1.188	1.485
High	Master Protein	Q9QZD9	Eukaryotic translation initiation factor 3 subunit I OS=Mus musculus GN=Eif3i PE=1 SV=1	0	59	13	181	13	325	36.4	3388	181	13	0	1.158	0.892866	4.93	1.196	1.088	1.158
High	Master Protein	Q60902	Epidermal growth factor receptor substrate 15-like 1 OS=Mus musculus GN=Eps15l1 PE=1 SV=3	0	52	31	196	31	907	99.2	3136	196	31	0	1.134	0.914861	8.07	1.196	1.134	1.002
High	Master Protein	P10126	Elongation factor 1-alpha 1 OS=Mus musculus GN=Eef1a1 PE=1 SV=3	0	67	23	1741	12	462	50.1	37377	1741	23	13	1.193	0.450092	0.39	1.196	1.193	1.123
High	Master Protein	Q9D8W5	26S proteasome non-ATPase regulatory subunit 12 OS=Mus musculus GN=Psmd12 PE=1 SV=4	0	49	19	175	19	456	52.9	4075	175	19	0	1.293	0.270352	7.41	1.196	1.293	1.357
High	Master Protein	Q9ET30	Transmembrane 9 superfamily member 3 OS=Mus musculus GN=Tm9sf3 PE=1 SV=1	0	25	12	195	12	587	67.5	2627	195	12	0	1.133	0.907011	8.18	1.196	1.133	1.065
High	Master Protein	Q8CGF7	Transcription elongation regulator 1 OS=Mus musculus GN=Tcerg1 PE=1 SV=2	0	24	24	170	24	1100	123.7	2475	170	24	0	1.016	0.9873	18.74	1.196	1.016	0.888
High	Master Protein	Q8BSZ2	AP-3 complex subunit sigma-2 OS=Mus musculus GN=Ap3s2 PE=1 SV=1	0	46	7	19	7	193	22	245	19	7	0	1.196	0.774087	29	1.196	1.509	0.962
High	Master Protein	A0A087WPT7	Phosphatidylinositol 3,4,5-trisphosphate 5-phosphatase 2 (Fragment) OS=Mus musculus GN=Inppl1 PE=1 SV=1	0	2	2	8	2	1166	128.9	114	8	2	0	1.195	0.960209	17.28	1.195	1.056	1.799
High	Master Protein	Q9CQM9	Glutaredoxin-3 OS=Mus musculus GN=Glrx3 PE=1 SV=1	0	36	9	87	9	337	37.8	1184	87	9	0	1.195	0.831795	8.01	1.195	1.092	1.26
High	Master Protein	Q8R317	Ubiquilin-1 OS=Mus musculus GN=Ubqln1 PE=1 SV=1	0	26	11	155	9	582	61.9	2980	155	11	0	1.195	0.826238	2.03	1.195	1.212	1.176
High	Master Protein	Q8CEC0	Nuclear pore complex protein Nup88 OS=Mus musculus GN=Nup88 PE=1 SV=1	0	17	7	31	7	753	84.9	327	31	7	0	1.195	0.841897	5.35	1.195	1.238	0.866
High	Master Protein	Q810J8	Zinc finger FYVE domain-containing protein 1 OS=Mus musculus GN=Zfyve1 PE=1 SV=2	0	23	13	63	13	777	86.9	349	63	13	0	0.996	0.985166	8.41	1.195	0.942	0.996
High	Master Protein	B1ATD4	Myotubularin-related protein 3 (Fragment) OS=Mus musculus GN=Mtmr3 PE=1 SV=1	0	10	7	29	7	1167	130.5	420	29	7	0	1.181	0.827115	1.73	1.195	1.136	1.181
High	Master Protein	Q61469	Phospholipid phosphatase 1 OS=Mus musculus GN=Plpp1 PE=1 SV=1	0	12	2	17	2	283	31.9	290	17	2	0	1.188	0.916864	0.81	1.195	1.188	0.882
High	Master Protein	Q8CG76	Aflatoxin B1 aldehyde reductase member 2 OS=Mus musculus GN=Akr7a2 PE=1 SV=3	0	43	11	100	11	367	40.6	1863	100	11	0	1.194	0.816924	14.74	1.194	1.051	1.313
High	Master Protein	Q91XV3	Brain acid soluble protein 1 OS=Mus musculus GN=Basp1 PE=1 SV=3	0	76	13	874	13	226	22.1	24959	874	13	0	1.193	0.447468	4.37	1.193	1.139	1.229
High	Master Protein	P50580	Proliferation-associated protein 2G4 OS=Mus musculus GN=Pa2g4 PE=1 SV=3	0	54	17	121	17	394	43.7	2319	121	17	0	1.183	0.685094	1.24	1.193	1.183	0.79
High	Master Protein	G3X972	SEC24 related gene family, member C (S. cerevisiae), isoform CRA_a OS=Mus musculus GN=Sec24c PE=1 SV=1	0	22	13	75	13	1096	118.5	1360	75	13	0	1.193	0.803429	4.97	1.193	0.855	1.233
High	Master Protein	Q6NV83	U2 snRNP-associated SURP motif-containing protein OS=Mus musculus GN=U2surp PE=1 SV=3	0	28	19	169	19	1029	118.2	1489	169	19	0	1.193	0.837136	20.56	1.193	1.358	0.856
High	Master Protein	Q8BTS4	Nuclear pore complex protein Nup54 OS=Mus musculus GN=Nup54 PE=1 SV=1	0	22	8	61	8	510	55.7	1084	61	8	0	0.859	0.632157	41.45	1.192	0.859	0.587
High	Master Protein	Q9JIW9	Ras-related protein Ral-B OS=Mus musculus GN=Ralb PE=1 SV=1	0	49	7	48	3	206	23.3	1022	48	7	0	0.925	0.89925	33.19	1.192	0.925	0.692
High	Master Protein	Q8BH24	Transmembrane 9 superfamily member 4 OS=Mus musculus GN=Tm9sf4 PE=1 SV=1	0	17	7	42	7	643	74.6	462	42	7	0	1.045	0.996172	7.34	1.192	0.994	1.045
High	Master Protein	P16330	2',3'-cyclic-nucleotide 3'-phosphodiesterase OS=Mus musculus GN=Cnp PE=1 SV=3	0	37	13	93	13	420	47.1	1502	93	13	0	1.093	0.984409	13.5	1.192	0.907	1.093
High	Master Protein	P25444	40S ribosomal protein S2 OS=Mus musculus GN=Rps2 PE=1 SV=3	0	59	17	313	17	293	31.2	7876	313	17	0	1.107	0.823858	2.57	1.192	1.088	1.107
High	Master Protein	Q9Z1D1	Eukaryotic translation initiation factor 3 subunit G OS=Mus musculus GN=Eif3g PE=1 SV=2	0	25	7	62	7	320	35.6	397	62	7	0	1.104	0.981178	4.96	1.191	1.104	1.067
High	Master Protein	P57759	Endoplasmic reticulum resident protein 29 OS=Mus musculus GN=Erp29 PE=1 SV=2	0	51	11	95	11	262	28.8	1515	95	11	0	1.071	0.973416	16.61	1.191	0.877	1.071
High	Master Protein	P32921	Tryptophan--tRNA ligase, cytoplasmic OS=Mus musculus GN=Wars PE=1 SV=2	0	53	19	229	19	481	54.3	6587	229	19	0	1.191	0.712813	7.7	1.191	1.085	1.253
High	Master Protein	P40237	CD82 antigen OS=Mus musculus GN=Cd82 PE=1 SV=1	0	8	2	9	2	266	29.6	170	9	2	0	0.81	0.41084	7.77	1.191	0.77	0.81
High	Master Protein	Q9Z130	Heterogeneous nuclear ribonucleoprotein D-like OS=Mus musculus GN=Hnrnpdl PE=1 SV=1	0	42	13	331	1	301	33.5	10404	331	13	0	1.069	0.993902	2.72	1.191	1.049	1.069
High	Master Protein	P35979	60S ribosomal protein L12 OS=Mus musculus GN=Rpl12 PE=1 SV=2	0	62	9	152	9	165	17.8	5437	152	9	0	1.191	0.514874	12.22	1.191	1.093	1.432
High	Master Protein	Q8C3X2	Coiled-coil domain-containing protein 90B, mitochondrial OS=Mus musculus GN=Ccdc90b PE=1 SV=1	0	18	3	21	3	256	29.6	342	21	3	0	1.026	0.999996	15.74	1.191	0.917	1.026
High	Master Protein	Q9QZ88	Vacuolar protein sorting-associated protein 29 OS=Mus musculus GN=Vps29 PE=1 SV=1	0	60	11	201	11	182	20.5	3746	201	11	0	1.152	0.860343	4.98	1.19	1.093	1.152
High	Master Protein	Q71B07	Probable C-mannosyltransferase DPY19L3 OS=Mus musculus GN=Dpy19l3 PE=2 SV=2	0	11	5	51	5	716	82.9	410	51	5	0	1.147	0.938879	0.91	1.19	1.147	1.14
High	Master Protein	P70399	TP53-binding protein 1 OS=Mus musculus GN=Tp53bp1 PE=1 SV=3	0	21	20	67	20	1969	212.6	928	67	20	0	1.138	0.914154	6.82	1.19	0.971	1.138
High	Master Protein	Q3TGS7	Sorting nexin 12, isoform CRA_b OS=Mus musculus GN=Snx12 PE=1 SV=1	0	39	4	32	4	166	19.2	720	32	4	0	1.19	0.766262	16.59	1.19	1.057	1.611
High	Master Protein	P31938	Dual specificity mitogen-activated protein kinase kinase 1 OS=Mus musculus GN=Map2k1 PE=1 SV=2	0	45	14	116	10	393	43.4	1372	116	14	4	1.19	0.759901	14.86	1.19	1.071	1.324
High	Master Protein	Q9JKY5	Huntingtin-interacting protein 1-related protein OS=Mus musculus GN=Hip1r PE=1 SV=2	0	22	22	84	21	1068	119.4	836	84	22	1	1.19	0.706453	2.32	1.19	1.382	1.171
High	Master Protein	Q6PAM0	5'-AMP-activated protein kinase subunit beta-2 OS=Mus musculus GN=Prkab2 PE=1 SV=1	0	24	3	14	3	271	30.2	310	14	3	0	1.19	0.923745	15.36	1.19	1.402	1.066
High	Master Protein	P35278	Ras-related protein Rab-5C OS=Mus musculus GN=Rab5c PE=1 SV=2	0	81	12	268	8	216	23.4	5095	268	12	0	1.19	0.672749	0.14	1.19	0.878	1.191
High	Master Protein	C0HKD8	Microfibrillar-associated protein 1A OS=Mus musculus GN=Mfap1a PE=1 SV=1	0	18	7	50	7	439	51.9	1101	50	7	0	1.048	0.999996	19.97	1.19	1.048	0.891
High	Master Protein	Q8K3X4	Interferon regulatory factor 2-binding protein-like OS=Mus musculus GN=Irf2bpl PE=1 SV=1	0	23	12	57	9	775	80.5	530	57	12	3	1.076	0.984017	14.42	1.189	0.972	1.076
High	Master Protein	Q9JHW4	Selenocysteine-specific elongation factor OS=Mus musculus GN=Eefsec PE=1 SV=2	0	9	4	14	4	583	63.5	167	14	4	0	1.189	0.895524	8.06	1.189	1.42	1.125
High	Master Protein	Q9CZU6	Citrate synthase, mitochondrial OS=Mus musculus GN=Cs PE=1 SV=1	0	50	22	526	22	464	51.7	8905	526	22	0	1.194	0.442523	0.65	1.189	1.194	1.285
High	Master Protein	A2AJ15	Endoplasmic reticulum mannosyl-oligosaccharide 1,2-alpha-mannosidase OS=Mus musculus GN=Man1b1 PE=1 SV=1	0	13	5	17	5	658	75.1	113	17	5	0	1.189	0.908198	31.38	1.189	0.747	1.44
High	Master Protein	Q6P9Q6	FK506-binding protein 15 OS=Mus musculus GN=Fkbp15 PE=1 SV=2	0	13	8	24	8	1216	132.9	242	24	8	0	1.056	0.993902	16.78	1.188	1.056	0.936
High	Master Protein	A0A0G2JG40	Guanine nucleotide-binding protein subunit alpha-12 (Fragment) OS=Mus musculus GN=Gna12 PE=1 SV=1	0	9	3	220	1	316	37	5388	220	3	0	1.215	0.976363	3.23	1.188	1.215	1.435
High	Master Protein	E9QKE9	Homeobox protein cut-like OS=Mus musculus GN=Cux1 PE=1 SV=1	0	11	10	26	3	1426	156.3	411	26	10	7	1.188	0.783623	12.32	1.188	1.287	1.052
High	Master Protein	A2RSX9	ADP-ribosylation factor-interacting protein 1 OS=Mus musculus GN=Arfip1 PE=1 SV=1	0	35	8	49	8	341	38.4	838	49	8	0	1.188	0.821429	8.64	1.188	1.257	1.041
High	Master Protein	Q8K0V4	CCR4-NOT transcription complex subunit 3 OS=Mus musculus GN=Cnot3 PE=1 SV=1	0	14	6	37	6	751	81.9	571	37	6	0	1.188	0.857464	15.58	1.188	1.377	1.063
High	Master Protein	Q91ZT5	FYVE, RhoGEF and PH domain-containing protein 4 OS=Mus musculus GN=Fgd4 PE=1 SV=1	0	5	2	8	2	766	86.5	66	8	2	0	0.984	0.985275	23.78	1.188	0.984	0.848
High	Master Protein	Q9R1K9	Centrin-2 OS=Mus musculus GN=Cetn2 PE=1 SV=1	0	49	6	36	6	172	19.8	766	36	6	0	1.2	0.770905	1.46	1.188	1.316	1.2
High	Master Protein	A0A0U1RPL0	Ataxin-2-like protein OS=Mus musculus GN=Atxn2l PE=1 SV=1	0	28	18	127	4	1096	115.2	1303	127	18	15	1.069	0.996271	1.23	1.187	1.069	1.06
High	Master Protein	P80317	T-complex protein 1 subunit zeta OS=Mus musculus GN=Cct6a PE=1 SV=3	0	56	25	303	21	531	58	7174	303	25	4	1.013	0.996172	2.64	1.187	0.995	1.013
High	Master Protein	O35379	Multidrug resistance-associated protein 1 OS=Mus musculus GN=Abcc1 PE=1 SV=1	0	14	14	44	14	1528	171.1	1036	44	14	0	1.187	0.7816	4.54	1.187	1.151	1.234
High	Master Protein	O88554	Poly [ADP-ribose] polymerase 2 OS=Mus musculus GN=Parp2 PE=1 SV=3	0	11	5	14	5	559	63.4	99	14	5	0	0.828	0.796657	44.88	1.187	0.828	0.576
High	Master Protein	Q8BGT7	Survival of motor neuron-related-splicing factor 30 OS=Mus musculus GN=Smndc1 PE=1 SV=1	0	42	6	45	6	238	26.7	1063	45	6	0	0.819	0.432545	14.66	1.187	0.819	0.745
High	Master Protein	O55029	Coatomer subunit beta' OS=Mus musculus GN=Copb2 PE=1 SV=2	0	56	33	276	33	905	102.4	4869	276	33	0	1.174	0.623868	1.68	1.187	1.067	1.174
High	Master Protein	S0DHL8	Capping protein, Arp2/3 and myosin-I linker protein 2 OS=Mus musculus GN=Carmil2 PE=1 SV=1	0	5	4	16	4	1397	151.7	129	16	4	0	1.187	0.975388	22.82	1.187	1.37	0.974
High	Master Protein	Q91X97	Neurocalcin-delta OS=Mus musculus GN=Ncald PE=1 SV=4	0	77	15	271	8	193	22.2	3599	271	15	2	1.187	0.762212	2.76	1.187	1.209	1.076
High	Master Protein	Q8CHT0	Delta-1-pyrroline-5-carboxylate dehydrogenase, mitochondrial OS=Mus musculus GN=Aldh4a1 PE=1 SV=3	0	12	5	29	5	562	61.8	530	29	5	0	1.187	0.886714	45.64	1.187	0.821	1.603
High	Master Protein	Q61081	Hsp90 co-chaperone Cdc37 OS=Mus musculus GN=Cdc37 PE=1 SV=1	0	31	10	118	10	379	44.6	2143	118	10	0	1.187	0.762704	8.76	1.187	0.923	1.257
High	Master Protein	Q61425	Hydroxyacyl-coenzyme A dehydrogenase, mitochondrial OS=Mus musculus GN=Hadh PE=1 SV=2	0	35	8	41	8	314	34.4	459	41	8	0	1.454	0.123865	27.29	1.187	1.847	1.454
High	Master Protein	Q99K24	Zinc transporter ZIP3 OS=Mus musculus GN=Slc39a3 PE=1 SV=1	0	6	1	25	1	317	34	335	25	1	0	1.187	0.976363	13.95	1.187	1.075	1.303
High	Master Protein	Q8VC42	Uncharacterized protein C18orf8 homolog OS=Mus musculus GN=Mic1 PE=2 SV=1	0	6	3	11	3	657	74.9	170	11	3	0	1.065	0.999849	6.35	1.186	1.02	1.065
High	Master Protein	P62892	60S ribosomal protein L39 OS=Mus musculus GN=Rpl39 PE=1 SV=2	0	20	1	32	1	51	6.4	219	32	1	0	1.186	0.862234	39.53	1.186	1.524	0.87
High	Master Protein	F8VPU2	FERM, RhoGEF and pleckstrin domain-containing protein 1 OS=Mus musculus GN=Farp1 PE=1 SV=1	0	23	16	118	16	1048	118.8	1419	118	16	0	1.186	0.838708	1.04	1.186	1.127	1.194
High	Master Protein	Q14CH0	Protein FAM171B OS=Mus musculus GN=Fam171b PE=1 SV=2	0	22	8	33	8	825	92	436	33	8	0	1.065	0.985275	16.86	1.186	1.065	0.759
High	Master Protein	Q9DAU1	Protein canopy homolog 3 OS=Mus musculus GN=Cnpy3 PE=1 SV=1	0	24	5	59	5	276	30.5	1613	59	5	0	1.186	0.777452	35.12	1.186	0.905	1.609
High	Master Protein	D3Z383	Mesoderm specific transcript, isoform CRA_a OS=Mus musculus GN=Mest PE=1 SV=2	0	15	4	23	4	342	39.5	419	23	4	0	1.186	0.79128	14.33	1.186	1.071	1.733
High	Master Protein	P14152	Malate dehydrogenase, cytoplasmic OS=Mus musculus GN=Mdh1 PE=1 SV=3	0	46	17	537	17	334	36.5	14181	537	17	0	1.186	0.479402	23.83	1.186	0.962	1.376
High	Master Protein	Q8BGD9	Eukaryotic translation initiation factor 4B OS=Mus musculus GN=Eif4b PE=1 SV=1	0	41	22	352	22	611	68.8	5452	352	22	0	0.958	0.955139	1.12	1.185	0.958	0.951
High	Master Protein	Q9CX00	IST1 homolog OS=Mus musculus GN=Ist1 PE=1 SV=1	0	30	6	15	6	362	39.4	114	15	6	0	1.185	0.927252	2.9	1.185	0.747	1.208
High	Master Protein	Q3UE37	Ubiquitin-conjugating enzyme E2 Z OS=Mus musculus GN=Ube2z PE=1 SV=2	0	10	3	19	3	356	38.3	244	19	3	0	1.185	0.802729	32.78	1.185	0.923	1.646
High	Master Protein	Q9CWK3	CD2 antigen cytoplasmic tail-binding protein 2 OS=Mus musculus GN=Cd2bp2 PE=1 SV=1	0	20	5	10	5	342	37.7	107	10	5	0	1.184	0.816239	4.87	1.184	1.146	1.364
High	Master Protein	Q8R5L3	Vam6/Vps39-like protein OS=Mus musculus GN=Vps39 PE=1 SV=1	0	9	5	35	5	886	101.6	537	35	5	0	0.967	0.976363	27.2	1.184	0.788	0.967
High	Master Protein	Q9QXE7	F-box-like/WD repeat-containing protein TBL1X OS=Mus musculus GN=Tbl1x PE=1 SV=2	0	45	12	84	9	527	56.8	2328	84	12	3	1.074	0.985275	9.6	1.184	1.004	1.074
High	Master Protein	E9QAE3	B-TFIID TATA-box-binding protein-associated factor 1 OS=Mus musculus GN=Btaf1 PE=1 SV=1	0	16	18	71	18	1848	206.9	670	71	18	0	1.184	0.786184	18.96	1.184	1.336	1.032
High	Master Protein	D9J2V6	Pre-B-cell leukemia transcription factor 1 OS=Mus musculus GN=Pbx1 PE=1 SV=1	0	23	4	7	4	339	37	192	7	4	0	1.184	0.892866	6.57	1.184	1.236	0.973
High	Master Protein	Q920E5	Farnesyl pyrophosphate synthase OS=Mus musculus GN=Fdps PE=1 SV=1	0	38	12	111	6	353	40.6	2779	111	12	6	1.184	0.789821	6.47	1.184	0.853	1.236
High	Master Protein	A0A1W2P729	Protein canopy homolog 2 (Fragment) OS=Mus musculus GN=Cnpy2 PE=1 SV=1	0	67	9	60	9	136	15.3	805	60	9	0	1.184	0.808238	32.96	1.184	0.807	1.447
High	Master Protein	Q9CR57	60S ribosomal protein L14 OS=Mus musculus GN=Rpl14 PE=1 SV=3	0	36	8	144	8	217	23.5	4148	144	8	0	1.183	0.490112	4.79	1.183	0.94	1.222
High	Master Protein	O88741	Ganglioside-induced differentiation-associated protein 1 OS=Mus musculus GN=Gdap1 PE=1 SV=1	0	44	10	114	10	358	41.3	2295	114	10	0	0.881	0.664503	2.9	1.183	0.864	0.881
High	Master Protein	Q8C5W3	Tubulin-specific chaperone cofactor E-like protein OS=Mus musculus GN=Tbcel PE=1 SV=1	0	32	8	25	8	424	48	177	25	8	0	1.165	0.851647	2.29	1.183	1.042	1.165
High	Master Protein	Q925I1	ATPase family AAA domain-containing protein 3 OS=Mus musculus GN=Atad3 PE=1 SV=1	0	34	18	192	18	591	66.7	2086	192	18	0	1.166	0.84038	2.19	1.183	1.166	1.093
High	Master Protein	Q99LB2	Dehydrogenase/reductase SDR family member 4 OS=Mus musculus GN=Dhrs4 PE=1 SV=3	0	23	6	45	6	279	29.9	605	45	6	0	1.183	0.852263	44.62	1.183	1.608	0.827
High	Master Protein	Q9CQI7	U2 small nuclear ribonucleoprotein B'' OS=Mus musculus GN=Snrpb2 PE=1 SV=1	0	52	10	98	7	225	25.3	1251	98	10	0	0.924	0.826885	12.98	1.183	0.849	0.924
High	Master Protein	Q6PGN3	Serine/threonine-protein kinase DCLK2 OS=Mus musculus GN=Dclk2 PE=1 SV=1	0	19	13	86	1	756	82.9	988	86	13	12	1.069	0.984017	15.79	1.182	1.069	0.931
High	Master Protein	P63260	Actin, cytoplasmic 2 OS=Mus musculus GN=Actg1 PE=1 SV=1	0	76	30	7222	1	375	41.8	187712	7222	30	0	1.158	0.870844	3.12	1.182	1.158	1.106
High	Master Protein	B1AZI6	THO complex subunit 2 OS=Mus musculus GN=Thoc2 PE=1 SV=1	0	19	23	145	23	1594	182.7	2801	145	23	0	1.147	0.929459	4.62	1.182	1.147	0.94
High	Master Protein	Q9DBR7	Protein phosphatase 1 regulatory subunit 12A OS=Mus musculus GN=Ppp1r12a PE=1 SV=2	0	20	13	46	12	1029	114.9	745	46	13	1	1.173	0.840202	1.13	1.182	1.073	1.173
High	Master Protein	Q5NCR9	Nuclear speckle splicing regulatory protein 1 OS=Mus musculus GN=Nsrp1 PE=1 SV=1	0	15	7	25	7	542	63.8	186	25	7	0	1.174	0.896866	0.98	1.182	1.174	0.836
High	Master Protein	Q8K1R7	Serine/threonine-protein kinase Nek9 OS=Mus musculus GN=Nek9 PE=1 SV=2	0	7	5	12	5	984	107.1	161	12	5	0	1.401	0.650352	23.25	1.182	1.401	1.911
High	Master Protein	Q3TKT4	Transcription activator BRG1 OS=Mus musculus GN=Smarca4 PE=1 SV=1	0	19	29	156	3	1613	181.3	2842	156	29	26	1.182	0.766161	0.29	1.182	1.175	1.184
High	Master Protein	Q80WJ7	Protein LYRIC OS=Mus musculus GN=Mtdh PE=1 SV=1	0	37	18	94	18	579	63.8	2093	94	18	0	0.977	0.94007	2.9	1.181	0.977	0.959
High	Master Protein	A0A0R4J2B6	Retinoblastoma-binding protein 5 OS=Mus musculus GN=Rbbp5 PE=1 SV=1	0	20	6	26	6	537	59	503	26	6	0	1.181	0.80469	19.54	1.181	1.914	1.025
High	Master Protein	Q8JZQ2	AFG3-like protein 2 OS=Mus musculus GN=Afg3l2 PE=1 SV=1	0	42	29	265	24	802	89.5	2921	265	29	4	1.181	0.644855	0.36	1.181	1.184	1.126
High	Master Protein	E9Q305	SET-binding factor 2 OS=Mus musculus GN=Sbf2 PE=1 SV=1	0	3	5	12	5	1847	207.5	204	12	5	0	1.181	0.914861	1.52	1.181	1.193	0.665
High	Master Protein	P62281	40S ribosomal protein S11 OS=Mus musculus GN=Rps11 PE=1 SV=3	0	48	12	239	3	158	18.4	2670	239	12	10	1.147	0.728053	4.29	1.181	1.108	1.147
High	Master Protein	Q99LP6	GrpE protein homolog 1, mitochondrial OS=Mus musculus GN=Grpel1 PE=1 SV=1	0	49	9	82	9	217	24.3	1644	82	9	0	1.18	0.840829	2.3	1.18	1.198	1.029
High	Master Protein	O70494	Transcription factor Sp3 OS=Mus musculus GN=Sp3 PE=1 SV=2	0	9	5	19	5	783	82.3	350	19	5	0	0.908	0.852263	22.36	1.18	0.789	0.908
High	Master Protein	O35326	Serine/arginine-rich splicing factor 5 OS=Mus musculus GN=Srsf5 PE=1 SV=2	0	35	9	136	8	269	30.9	2713	136	9	0	0.825	0.401915	16.15	1.179	0.744	0.825
High	Master Protein	Q8CII2	Cell division cycle protein 123 homolog OS=Mus musculus GN=Cdc123 PE=1 SV=2	0.007	2	1	14	1	336	38.8	304	14	1	0	1.174	0.871837	0.69	1.179	1.051	1.174
High	Master Protein	P50153	Guanine nucleotide-binding protein G(I)/G(S)/G(O) subunit gamma-4 OS=Mus musculus GN=Gng4 PE=1 SV=1	0	44	2	15	2	75	8.4	466	15	2	0	0.898	0.795424	7.79	1.179	0.853	0.898
High	Master Protein	Q8BGQ1	Spermatogenesis-defective protein 39 homolog OS=Mus musculus GN=Vipas39 PE=1 SV=1	0	27	10	36	10	491	56.6	292	36	10	0	1.179	0.895299	0.78	1.179	1.173	1.416
High	Master Protein	Q80ZX0	Sec24-related gene family, member B (S. cerevisiae) OS=Mus musculus GN=Sec24b PE=1 SV=1	0	24	21	116	21	1251	135.5	2150	116	21	0	1.284	0.582868	4.45	1.179	1.284	1.322
High	Master Protein	Q9DBF1	Alpha-aminoadipic semialdehyde dehydrogenase OS=Mus musculus GN=Aldh7a1 PE=1 SV=4	0	41	16	139	16	539	58.8	3073	139	16	0	1.179	0.708227	19.11	1.179	1.027	1.848
High	Master Protein	Q8R5H6	Wiskott-Aldrich syndrome protein family member 1 OS=Mus musculus GN=Wasf1 PE=1 SV=2	0	39	11	48	11	559	61.5	765	48	11	0	1.309	0.385852	14.83	1.178	1.597	1.309
High	Master Protein	O70252	Heme oxygenase 2 OS=Mus musculus GN=Hmox2 PE=1 SV=1	0	54	14	199	14	315	35.7	2219	199	14	0	0.975	0.958607	10.4	1.178	0.975	0.911
High	Master Protein	Q05D44	Eukaryotic translation initiation factor 5B OS=Mus musculus GN=Eif5b PE=1 SV=2	0	12	10	42	10	1216	137.5	906	42	10	0	0.936	0.914606	9.09	1.178	0.936	0.882
High	Master Protein	Q9QXS1	Plectin OS=Mus musculus GN=Plec PE=1 SV=3	0	36	124	595	122	4691	533.9	8927	595	124	2	1.361	0.045106	19.88	1.178	1.864	1.361
High	Master Protein	Q8R3I3	Conserved oligomeric Golgi complex subunit 6 OS=Mus musculus GN=Cog6 PE=1 SV=2	0	20	7	15	7	657	73	116	15	7	0	1.433	0.145962	16.08	1.178	1.588	1.433
High	Master Protein	Q8BYA0	Tubulin-specific chaperone D OS=Mus musculus GN=Tbcd PE=1 SV=1	0	13	12	25	12	1196	133.2	185	25	12	0	1.02	0.99873	22.89	1.178	0.704	1.02
High	Master Protein	P61255	60S ribosomal protein L26 OS=Mus musculus GN=Rpl26 PE=1 SV=1	0	46	8	139	8	145	17.2	1751	139	8	0	1.056	0.985275	3.94	1.178	1.056	1.027
High	Master Protein	Q7TSC1	Protein PRRC2A OS=Mus musculus GN=Prrc2a PE=1 SV=1	0	17	24	103	23	2158	229.1	689	103	24	0	1.157	0.857941	2.63	1.178	1.029	1.157
High	Master Protein	P60710	Actin, cytoplasmic 1 OS=Mus musculus GN=Actb PE=1 SV=1	0	76	30	7194	1	375	41.7	186941	7194	30	49	1.178	0.518378	7.37	1.178	1.105	1.236
High	Master Protein	E9QLS6	Phosphatidylinositol 3-kinase catalytic subunit type 3 OS=Mus musculus GN=Pik3c3 PE=1 SV=1	0	11	5	29	5	848	96.8	137	29	5	0	1.177	0.956465	9.27	1.177	1.034	1.251
High	Master Protein	G5E8R8	UBX domain-containing protein 7 OS=Mus musculus GN=Ubxn7 PE=1 SV=1	0	35	13	114	13	489	54.8	1454	114	13	0	1.126	0.947601	1.75	1.177	1.126	1.113
High	Master Protein	Q9JIK9	28S ribosomal protein S34, mitochondrial OS=Mus musculus GN=Mrps34 PE=1 SV=1	0	34	6	43	6	218	25.8	598	43	6	0	1.072	0.989059	14.52	1.177	0.929	1.072
High	Master Protein	Q61214	Dual specificity tyrosine-phosphorylation-regulated kinase 1A OS=Mus musculus GN=Dyrk1a PE=1 SV=1	0	17	9	42	7	763	85.4	298	42	9	2	1.177	0.835629	8.93	1.177	1.248	0.832
High	Master Protein	Q9ESP1	Stromal cell-derived factor 2-like protein 1 OS=Mus musculus GN=Sdf2l1 PE=1 SV=2	0	38	5	53	5	221	23.6	367	53	5	0	0.994	0.993977	4.13	1.177	0.967	0.994
High	Master Protein	Q8VBW6	NEDD8-activating enzyme E1 regulatory subunit OS=Mus musculus GN=Nae1 PE=1 SV=1	0	34	13	171	13	534	60.2	3464	171	13	0	1.177	0.87604	8.77	1.177	0.851	1.247
High	Master Protein	S4R2D2	ADP-ribosylation factor-binding protein GGA3 OS=Mus musculus GN=Gga3 PE=1 SV=1	0	8	3	14	3	595	64.5	158	14	3	0	1.177	0.938444	13.04	1.177	0.74	1.28
High	Master Protein	Q9JMD0	BUB3-interacting and GLEBS motif-containing protein ZNF207 OS=Mus musculus GN=Znf207 PE=1 SV=1	0	13	6	51	6	495	52.8	684	51	6	0	1.15	0.906382	3.43	1.177	1.073	1.15
High	Master Protein	F8VQC1	Signal recognition particle subunit SRP72 OS=Mus musculus GN=Srp72 PE=1 SV=1	0	36	18	96	18	671	74.6	2011	96	18	0	1.121	0.955672	7.43	1.177	1.121	0.994
High	Master Protein	A2AQ19	RNA polymerase-associated protein RTF1 homolog OS=Mus musculus GN=Rtf1 PE=1 SV=1	0	5	4	23	4	715	80.7	576	23	4	0	1.055	0.993902	17.06	1.177	1.055	0.744
High	Master Protein	Q91ZJ5	UTP--glucose-1-phosphate uridylyltransferase OS=Mus musculus GN=Ugp2 PE=1 SV=3	0	33	11	77	11	508	56.9	1745	77	11	0	1.176	0.860735	3.25	1.176	1.151	1.255
High	Master Protein	Q5DU25	IQ motif and SEC7 domain-containing protein 2 OS=Mus musculus GN=Iqsec2 PE=1 SV=3	0	6	7	16	4	1478	161.7	99	16	7	0	1.102	0.993902	3.76	1.176	1.074	1.102
High	Master Protein	O35602	Retinal homeobox protein Rx OS=Mus musculus GN=Rax PE=2 SV=2	0	35	8	46	8	342	36.3	270	46	8	0	1.086	0.97231	12.39	1.176	1.086	0.793
High	Master Protein	O09061	Proteasome subunit beta type-1 OS=Mus musculus GN=Psmb1 PE=1 SV=1	0	51	9	102	9	240	26.4	2235	102	9	0	1.176	0.717033	3.86	1.176	1.146	1.217
High	Master Protein	Q9CQ56	Vesicle transport protein USE1 OS=Mus musculus GN=Use1 PE=1 SV=1	0	17	3	17	3	270	30.6	134	17	3	0	1.119	0.972862	7.52	1.176	1.119	0.855
High	Master Protein	Q8VCH7	Retinol dehydrogenase 10 OS=Mus musculus GN=Rdh10 PE=1 SV=2	0	29	6	58	6	341	38.1	1685	58	6	0	0.894	0.798435	35.5	1.176	0.672	0.894
High	Master Protein	P19157	Glutathione S-transferase P 1 OS=Mus musculus GN=Gstp1 PE=1 SV=2	0	67	11	323	11	210	23.6	6723	323	11	0	1.176	0.525849	20.44	1.176	1.014	1.495
High	Master Protein	Q6P8X1	Sorting nexin-6 OS=Mus musculus GN=Snx6 PE=1 SV=2	0	20	7	45	7	406	46.6	983	45	7	0	1.187	0.762363	0.52	1.176	1.191	1.187
High	Master Protein	Q9R1T2	SUMO-activating enzyme subunit 1 OS=Mus musculus GN=Sae1 PE=1 SV=1	0	58	16	321	16	350	38.6	7604	321	16	0	1.175	0.669037	19.12	1.175	1.024	1.331
High	Master Protein	P62267	40S ribosomal protein S23 OS=Mus musculus GN=Rps23 PE=1 SV=3	0	50	7	114	7	143	15.8	2004	114	7	0	1.038	0.999996	19.52	1.175	1.038	0.874
High	Master Protein	Q9R0N7	Synaptotagmin-7 OS=Mus musculus GN=Syt7 PE=1 SV=1	0	29	8	39	8	403	45.4	619	39	8	0	1.107	0.956465	9.13	1.175	1.029	1.107
High	Master Protein	Q9D554	Splicing factor 3A subunit 3 OS=Mus musculus GN=Sf3a3 PE=1 SV=2	0	56	22	147	22	501	58.8	2031	147	22	0	1.086	0.976363	12.07	1.175	1.086	0.867
High	Master Protein	Q9JIF7	Coatomer subunit beta OS=Mus musculus GN=Copb1 PE=1 SV=1	0	41	30	290	30	953	107	5642	290	30	0	1.175	0.723978	1.83	1.175	1.189	1.115
High	Master Protein	Q62193	Replication protein A 32 kDa subunit OS=Mus musculus GN=Rpa2 PE=1 SV=1	0	21	3	17	3	270	29.7	184	17	3	0	1.025	0.99873	12.12	1.174	1.025	0.941
High	Master Protein	Q8C483	Serine--tRNA ligase, cytoplasmic OS=Mus musculus GN=Sars PE=1 SV=1	0	43	19	195	19	536	61.1	1892	195	19	0	1.174	0.682532	1.14	1.174	1.165	1.341
High	Master Protein	Q8R050	Eukaryotic peptide chain release factor GTP-binding subunit ERF3A OS=Mus musculus GN=Gspt1 PE=1 SV=2	0	32	15	79	9	636	68.6	1425	79	15	6	1.174	0.882408	1.93	1.174	1.045	1.19
High	Master Protein	Q8C7X2	ER membrane protein complex subunit 1 OS=Mus musculus GN=Emc1 PE=1 SV=1	0	40	24	234	24	997	111.5	4554	234	24	0	1.149	0.894997	3.25	1.174	1.149	1.083
High	Master Protein	P10711	Transcription elongation factor A protein 1 OS=Mus musculus GN=Tcea1 PE=1 SV=2	0	59	14	117	14	301	33.9	1774	117	14	0	1.172	0.694903	0.2	1.174	1.172	0.837
High	Master Protein	Q9CQC9	GTP-binding protein SAR1b OS=Mus musculus GN=Sar1b PE=1 SV=1	0	57	8	120	4	198	22.4	1564	120	8	0	0.998	0.984017	0.01	1.174	0.998	0.998
High	Master Protein	Q8BYM8	Probable cysteine--tRNA ligase, mitochondrial OS=Mus musculus GN=Cars2 PE=1 SV=2	0	15	5	32	5	551	61.2	464	32	5	0	1.232	0.914841	2.58	1.174	1.254	1.232
High	Master Protein	E9PYT6	VPS10 domain-containing receptor SorCS1 OS=Mus musculus GN=Sorcs1 PE=1 SV=2	0	10	8	19	8	1168	129.8	132	19	8	0	1.174	0.916864	8.99	1.174	1.245	0.964
High	Master Protein	P34152	Focal adhesion kinase 1 OS=Mus musculus GN=Ptk2 PE=1 SV=3	0	7	3	9	3	1090	123.5	63	9	3	0	1.179	0.97527	0.67	1.174	1.195	1.179
High	Master Protein	Q8BKX6	Serine/threonine-protein kinase SMG1 OS=Mus musculus GN=Smg1 PE=1 SV=3	0	5	10	17	10	3658	409.5	146	17	10	0	1.128	0.955872	1.66	1.173	1.115	1.128
High	Master Protein	Q80UP5	Ankyrin repeat domain-containing protein 13A OS=Mus musculus GN=Ankrd13a PE=1 SV=2	0	24	7	22	7	588	67.1	369	22	7	0	1.173	0.906876	4.48	1.173	1.209	1.066
High	Master Protein	P63017	Heat shock cognate 71 kDa protein OS=Mus musculus GN=Hspa8 PE=1 SV=1	0	80	45	2740	30	646	70.8	76644	2740	45	14	1.017	0.993902	5.56	1.173	0.979	1.017
High	Master Protein	P47962	60S ribosomal protein L5 OS=Mus musculus GN=Rpl5 PE=1 SV=3	0	60	17	326	17	297	34.4	8459	326	17	0	1.049	0.970229	17.34	1.173	1.049	0.926
High	Master Protein	Q9CPQ1	Cytochrome c oxidase subunit 6C OS=Mus musculus GN=Cox6c PE=1 SV=3	0	61	7	142	7	76	8.5	1517	142	7	0	1.112	0.806871	8.15	1.173	1.112	0.83
High	Master Protein	P62320	Small nuclear ribonucleoprotein Sm D3 OS=Mus musculus GN=Snrpd3 PE=1 SV=1	0	56	7	126	7	126	13.9	1599	126	7	0	1.015	0.993902	9.81	1.173	1.015	0.948
High	Master Protein	Q8VBV7	COP9 signalosome complex subunit 8 OS=Mus musculus GN=Cops8 PE=1 SV=1	0	47	6	96	6	209	23.2	837	96	6	0	1.173	0.89122	12.68	1.173	1.073	1.456
High	Master Protein	F8WHT3	Protein PRRC2B OS=Mus musculus GN=Prrc2b PE=1 SV=1	0	7	10	36	8	2230	243	246	36	10	0	1.029	0.999996	6.97	1.173	0.981	1.029
High	Master Protein	Q62165	Dystroglycan OS=Mus musculus GN=Dag1 PE=1 SV=4	0	20	13	115	13	893	96.8	1512	115	13	0	1.173	0.859747	0.02	1.173	1.173	1.008
High	Master Protein	Q6NVF9	Cleavage and polyadenylation specificity factor subunit 6 OS=Mus musculus GN=Cpsf6 PE=1 SV=1	0	24	10	85	10	551	59.1	1610	85	10	0	1.115	0.947541	7.68	1.173	1.115	0.851
High	Master Protein	Q3THS6	S-adenosylmethionine synthase isoform type-2 OS=Mus musculus GN=Mat2a PE=1 SV=2	0	40	14	74	14	395	43.7	1095	74	14	0	1.172	0.824196	9.43	1.172	1.098	1.328
High	Master Protein	E9QAQ3	Rho GTPase-activating protein 26 OS=Mus musculus GN=Arhgap26 PE=1 SV=1	0	9	5	30	5	759	85.9	275	30	5	0	0.875	0.59336	37.6	1.172	0.623	0.875
High	Master Protein	A2A9S0	ELAV-like protein OS=Mus musculus GN=Elavl4 PE=1 SV=1	0	37	10	55	4	383	42.3	846	55	10	7	1.172	0.883165	9.25	1.172	1.099	1.55
High	Master Protein	B7ZC46	Septin-8 OS=Mus musculus GN=Sept8 PE=1 SV=1	0	54	20	323	13	440	50.9	7501	323	20	0	1.172	0.535736	0.89	1.172	1.051	1.179
High	Master Protein	Q9QUR6	Prolyl endopeptidase OS=Mus musculus GN=Prep PE=1 SV=1	0	47	28	145	28	710	80.7	2200	145	28	0	1.172	0.838771	29.6	1.172	0.914	1.406
High	Master Protein	Q8CI51	PDZ and LIM domain protein 5 OS=Mus musculus GN=Pdlim5 PE=1 SV=4	0	37	16	128	3	591	63.3	2158	128	16	14	1.22	0.305298	5.89	1.172	1.282	1.22
High	Master Protein	O35841	Apoptosis inhibitor 5 OS=Mus musculus GN=Api5 PE=1 SV=2	0	52	21	141	21	504	56.8	3625	141	21	0	1.107	0.883777	8.73	1.172	1.107	0.95
High	Master Protein	Q68FH0	Plakophilin-4 OS=Mus musculus GN=Pkp4 PE=1 SV=1	0	36	28	123	27	1190	131.5	1914	123	28	1	1.036	0.993902	5.47	1.171	1.036	0.998
High	Master Protein	Q8R086	Sulfite oxidase, mitochondrial OS=Mus musculus GN=Suox PE=1 SV=2	0	30	8	39	8	546	60.7	855	39	8	0	1.171	0.832037	10.43	1.171	1.254	1.078
High	Master Protein	Q9DCD0	6-phosphogluconate dehydrogenase, decarboxylating OS=Mus musculus GN=Pgd PE=1 SV=3	0	47	19	178	19	483	53.2	4448	178	19	0	1.171	0.585489	2.26	1.171	1.089	1.189
High	Master Protein	Q9JLB0	MAGUK p55 subfamily member 6 OS=Mus musculus GN=Mpp6 PE=1 SV=1	0	55	26	237	24	553	62.6	4394	237	26	0	1.171	0.688028	3.62	1.171	1.114	1.2
High	Master Protein	Q8BFT9	Synaptic vesicle 2-related protein OS=Mus musculus GN=Svop PE=1 SV=1	0	15	6	19	6	548	60.7	132	19	6	0	1.171	0.850287	58.84	1.171	1.78	0.706
High	Master Protein	A0A0R4J0B5	cDNA sequence BC017158 OS=Mus musculus GN=BC017158 PE=1 SV=1	0	32	12	47	12	466	50.5	345	47	12	0	1.171	0.822844	0.3	1.171	1.174	1.019
High	Master Protein	Q71FD5	E3 ubiquitin-protein ligase ZNRF2 OS=Mus musculus GN=Znrf2 PE=1 SV=1	0.001	14	2	11	2	238	23.7	76	11	2	0	1.261	0.897462	10.53	1.171	1.824	1.261
High	Master Protein	D3YVW2	Golgi integral membrane protein 4 OS=Mus musculus GN=Golim4 PE=1 SV=1	0	22	8	33	8	683	79.9	451	33	8	0	1.171	0.845139	3.72	1.171	1.2	0.752
High	Master Protein	Q8BP48	Methionine aminopeptidase 1 OS=Mus musculus GN=Metap1 PE=1 SV=1	0	30	7	44	7	386	43.2	781	44	7	0	1.057	0.996172	10.72	1.17	0.981	1.057
High	Master Protein	Q9QYE9	Pleckstrin homology domain-containing family B member 1 OS=Mus musculus GN=Plekhb1 PE=1 SV=1	0	30	5	32	1	243	27.3	509	32	5	4	0.948	0.932345	11.93	1.17	0.878	0.948
High	Master Protein	Q8VD04	GRIP1-associated protein 1 OS=Mus musculus GN=Gripap1 PE=1 SV=1	0	40	23	98	1	806	92.7	1079	98	23	22	1.062	0.999996	3.16	1.17	1.062	1.039
High	Master Protein	Q3ULL6	UPF3 regulator of nonsense transcripts homolog B (yeast) OS=Mus musculus GN=Upf3b PE=1 SV=1	0	25	8	24	8	472	57	174	24	8	0	0.998	0.984017	15.38	1.17	0.998	0.904
High	Master Protein	Q91YR1	Twinfilin-1 OS=Mus musculus GN=Twf1 PE=1 SV=2	0	43	10	62	9	350	40.1	627	62	10	1	1.17	0.824467	7.69	1.17	1.658	1.109
High	Master Protein	O88967	ATP-dependent zinc metalloprotease YME1L1 OS=Mus musculus GN=Yme1l1 PE=1 SV=1	0	9	4	15	4	715	80	86	15	4	0	1.326	0.680764	13.88	1.17	1.451	1.326
High	Master Protein	E9Q624	Zinc finger protein 644 OS=Mus musculus GN=Zfp644 PE=1 SV=1	0	7	6	10	6	1292	144.9	106	10	6	0	1.17	0.823858	16.66	1.17	1.495	1.038
High	Master Protein	P26369	Splicing factor U2AF 65 kDa subunit OS=Mus musculus GN=U2af2 PE=1 SV=3	0	49	17	481	14	475	53.5	6198	481	17	6	1.145	0.691178	3.14	1.169	1.145	0.912
High	Master Protein	O88935	Synapsin-1 OS=Mus musculus GN=Syn1 PE=1 SV=2	0	67	30	704	27	706	74.1	14631	704	30	4	1.028	0.986287	3.46	1.169	1.028	1.004
High	Master Protein	E9QLB2	Lysophospholipase-like protein 1 OS=Mus musculus GN=Lyplal1 PE=1 SV=1	0	34	5	10	5	239	26.3	81	10	5	0	1.168	0.95823	7.83	1.168	0.824	1.23
High	Master Protein	Q6ZPJ3	(E3-independent) E2 ubiquitin-conjugating enzyme UBE2O OS=Mus musculus GN=Ube2o PE=1 SV=3	0	30	22	98	22	1288	140.7	739	98	22	0	1.168	0.877259	18.74	1.168	1.021	1.323
High	Master Protein	A0A140LIM2	AN1-type zinc finger protein 6 (Fragment) OS=Mus musculus GN=Zfand6 PE=1 SV=1	0	23	3	6	3	217	23.2	84	6	3	0	1.168	0.975388	27.7	1.168	1.464	0.95
High	Master Protein	Q3TFD0	Serine hydroxymethyltransferase OS=Mus musculus GN=Shmt2 PE=1 SV=1	0	42	12	74	12	501	55.4	948	74	12	0	1.168	0.884069	0.56	1.168	1.861	1.163
High	Master Protein	Q6PD26	GPI transamidase component PIG-S OS=Mus musculus GN=Pigs PE=1 SV=3	0	17	5	36	5	555	61.7	837	36	5	0	1.168	0.829165	3.44	1.168	0.935	1.195
High	Master Protein	Q80VP1	Epsin-1 OS=Mus musculus GN=Epn1 PE=1 SV=3	0	30	8	58	8	575	60.2	1107	58	8	0	0.983	0.969724	0.28	1.167	0.982	0.983
High	Master Protein	Q8BMD6	Transmembrane protein 260 OS=Mus musculus GN=Tmem260 PE=2 SV=2	0	14	8	47	8	703	78.9	283	47	8	0	1.079	0.984017	12.16	1.167	1.079	0.735
High	Master Protein	Q6DFZ1	Golgi-specific brefeldin A-resistance factor 1 OS=Mus musculus GN=Gbf1 PE=1 SV=1	0	22	24	144	24	1861	206.7	1766	144	24	0	1.14	0.941957	3.51	1.167	0.948	1.14
High	Master Protein	Q8R123	FAD synthase OS=Mus musculus GN=Flad1 PE=1 SV=1	0	12	4	7	4	492	54.7	70	7	4	0	1.485	0.327009	17.65	1.167	1.662	1.485
High	Master Protein	Q922R1	UPF0183 protein C16orf70 homolog OS=Mus musculus PE=1 SV=2	0	22	5	23	5	422	47.4	67	23	5	0	1.167	0.927043	17.68	1.167	1.027	1.341
High	Master Protein	P62849	40S ribosomal protein S24 OS=Mus musculus GN=Rps24 PE=1 SV=1	0	35	4	76	4	133	15.4	1922	76	4	0	1.12	0.944276	6.1	1.167	1.12	1.029
High	Master Protein	A0A1L1SV73	Ubiquitin carboxyl-terminal hydrolase 47 OS=Mus musculus GN=Usp47 PE=1 SV=1	0	17	16	52	16	1376	157.1	561	52	16	0	1.025	0.999849	12.5	1.166	1.025	0.938
High	Master Protein	A0A0R4J0Z1	Protein disulfide-isomerase A4 OS=Mus musculus GN=Pdia4 PE=1 SV=1	0	60	35	359	34	641	72.3	9217	359	35	0	1.133	0.705785	4.35	1.166	0.962	1.133
High	Master Protein	P16125	L-lactate dehydrogenase B chain OS=Mus musculus GN=Ldhb PE=1 SV=2	0	59	19	555	17	334	36.5	17878	555	19	0	1.072	0.922648	12.96	1.166	0.923	1.072
High	Master Protein	P27048	Small nuclear ribonucleoprotein-associated protein B OS=Mus musculus GN=Snrpb PE=1 SV=1	0	26	6	98	6	231	23.6	1186	98	6	0	1.015	0.9873	6.26	1.166	0.972	1.015
High	Master Protein	P61458	Pterin-4-alpha-carbinolamine dehydratase OS=Mus musculus GN=Pcbd1 PE=1 SV=2	0	42	4	18	3	104	12	177	18	4	1	1.222	0.810391	4.42	1.166	1.222	1.258
High	Master Protein	A0A0J9YTU3	Cytospin-B OS=Mus musculus GN=Specc1 PE=1 SV=1	0	2	2	22	2	1058	117	190	22	2	0	1.165	0.968151	17.8	1.165	1.025	1.42
High	Master Protein	Q8BZF8	Phosphoglucomutase-like protein 5 OS=Mus musculus GN=Pgm5 PE=1 SV=2	0.001	2	1	11	1	567	62.2	161	11	1	0	1.165	0.83757	43.17	1.165	0.719	1.505
High	Master Protein	P24547	Inosine-5'-monophosphate dehydrogenase 2 OS=Mus musculus GN=Impdh2 PE=1 SV=2	0	39	16	220	6	514	55.8	4135	220	16	7	1.111	0.967561	7.2	1.165	1.057	1.111
High	Master Protein	A0A1D5RLV1	Protein 4.1 (Fragment) OS=Mus musculus GN=Epb41 PE=1 SV=1	0	46	19	400	1	476	54	6393	400	19	0	1.165	0.949158	57.58	1.165	1.801	0.713
High	Master Protein	A0A1B0GRT6	Receptor-type tyrosine-protein phosphatase OS=Mus musculus GN=Ptpre PE=1 SV=1	0	13	6	14	4	719	82.6	109	14	6	0	1.133	0.976653	4.17	1.165	1.133	0.941
High	Master Protein	Q3UXG7	GDP-fucose protein O-fucosyltransferase 1 OS=Mus musculus GN=Pofut1 PE=1 SV=1	0	38	8	63	8	353	40	752	63	8	0	1.165	0.891949	23.87	1.165	0.977	1.565
High	Master Protein	O35900	U6 snRNA-associated Sm-like protein LSm2 OS=Mus musculus GN=Lsm2 PE=1 SV=1	0	61	5	43	5	95	10.8	1342	43	5	0	1.095	0.984017	9.36	1.164	1.095	0.967
High	Master Protein	Q8CHP5	Partner of Y14 and mago OS=Mus musculus GN=Pym1 PE=1 SV=2	0	47	4	21	4	203	22.7	106	21	4	0	1.164	0.90094	8.33	1.164	1.23	0.817
High	Master Protein	Q32NY4	Metal transporter CNNM3 OS=Mus musculus GN=Cnnm3 PE=1 SV=2	0	8	4	13	3	713	76.2	132	13	4	0	1.325	0.840603	18.02	1.164	1.325	1.608
High	Master Protein	Q8CDN6	Thioredoxin-like protein 1 OS=Mus musculus GN=Txnl1 PE=1 SV=3	0	53	12	99	12	289	32.2	1696	99	12	0	1.149	0.897462	1.95	1.164	1.117	1.149
High	Master Protein	P05132	cAMP-dependent protein kinase catalytic subunit alpha OS=Mus musculus GN=Prkaca PE=1 SV=3	0	46	14	261	5	351	40.5	4003	261	14	0	1.163	0.855493	38.77	1.163	0.859	1.487
High	Master Protein	Q6PER3	Microtubule-associated protein RP/EB family member 3 OS=Mus musculus GN=Mapre3 PE=1 SV=1	0	64	18	284	2	281	31.9	6066	284	18	18	0.989	0.99256	5.62	1.163	0.989	0.953
High	Master Protein	B1ART2	Vacuolar protein sorting 13D OS=Mus musculus GN=Vps13d PE=1 SV=2	0	4	12	28	12	4390	490.7	179	28	12	0	1.163	0.928445	24.24	1.163	1.407	0.973
High	Master Protein	Q3TU36	RAP1, GTP-GDP dissociation stimulator 1 OS=Mus musculus GN=Rap1gds1 PE=1 SV=1	0	49	23	229	1	606	66	5255	229	23	26	1.184	0.602586	1.98	1.162	1.184	1.2
High	Master Protein	Q9Z2C4	Myotubularin-related protein 1 OS=Mus musculus GN=Mtmr1 PE=1 SV=1	0	34	12	54	12	669	75.3	631	54	12	0	0.943	0.914841	19.49	1.162	0.943	0.833
High	Master Protein	A1L3P4	Sodium/hydrogen exchanger OS=Mus musculus GN=Slc9a6 PE=1 SV=1	0	11	5	29	5	702	77.9	443	29	5	0	1.162	0.858533	3.36	1.162	1.188	0.9
High	Master Protein	Q91W89	Alpha-mannosidase 2C1 OS=Mus musculus GN=Man2c1 PE=1 SV=1	0	27	17	65	17	1039	115.6	632	65	17	0	1.162	0.851444	8.13	1.162	1.098	1.368
High	Master Protein	P58389	Serine/threonine-protein phosphatase 2A activator OS=Mus musculus GN=Ptpa PE=1 SV=1	0	62	16	127	16	323	36.7	1947	127	16	0	1.212	0.715668	6.17	1.162	1.212	1.611
High	Master Protein	Q8R1V4	Transmembrane emp24 domain-containing protein 4 OS=Mus musculus GN=Tmed4 PE=1 SV=1	0	38	9	74	8	227	26	1556	74	9	1	1.162	0.868295	1.03	1.162	1.195	1.154
High	Master Protein	Q8K212	Phosphofurin acidic cluster sorting protein 1 OS=Mus musculus GN=Pacs1 PE=1 SV=2	0	34	21	136	21	961	104.8	2526	136	21	0	1.245	0.631188	4	1.162	1.278	1.245
High	Master Protein	Q60676	Serine/threonine-protein phosphatase 5 OS=Mus musculus GN=Ppp5c PE=1 SV=3	0	36	12	111	12	499	56.8	1511	111	12	0	1.018	0.984735	2.43	1.162	1.018	1.001
High	Master Protein	P59999	Actin-related protein 2/3 complex subunit 4 OS=Mus musculus GN=Arpc4 PE=1 SV=3	0	68	10	168	10	168	19.7	2366	168	10	0	1.162	0.880288	0.38	1.162	1.165	1.145
High	Master Protein	Q6ZQ38	Cullin-associated NEDD8-dissociated protein 1 OS=Mus musculus GN=Cand1 PE=1 SV=2	0	45	47	674	46	1230	136.2	17974	674	47	1	1.097	0.860343	5.18	1.162	1.059	1.097
High	Master Protein	O70435	Proteasome subunit alpha type-3 OS=Mus musculus GN=Psma3 PE=1 SV=3	0	49	11	151	11	255	28.4	2586	151	11	0	1.162	0.769894	15.92	1.162	1.286	0.824
High	Master Protein	Q91XM9	Disks large homolog 2 OS=Mus musculus GN=Dlg2 PE=1 SV=2	0	45	25	280	21	852	94.8	4002	280	25	0	1.161	0.766262	3.59	1.161	0.987	1.19
High	Master Protein	Q9JKK7	Tropomodulin-2 OS=Mus musculus GN=Tmod2 PE=1 SV=2	0	46	11	182	10	351	39.5	3418	182	11	1	1.054	0.993902	15.11	1.161	0.911	1.054
High	Master Protein	Q3UHD6	Sorting nexin-27 OS=Mus musculus GN=Snx27 PE=1 SV=2	0	39	13	55	13	539	61	1178	55	13	0	1.161	0.894997	3.47	1.161	1.188	1.07
High	Master Protein	Q8K097	Protein lifeguard 2 OS=Mus musculus GN=Faim2 PE=2 SV=1	0	12	3	57	3	317	35.2	1016	57	3	0	0.947	0.94007	0.5	1.161	0.947	0.944
High	Master Protein	Q00612	Glucose-6-phosphate 1-dehydrogenase X OS=Mus musculus GN=G6pdx PE=1 SV=3	0	48	21	230	21	515	59.2	4865	230	21	0	1.16	0.775093	3.24	1.16	1.007	1.186
High	Master Protein	P97496	SWI/SNF complex subunit SMARCC1 OS=Mus musculus GN=Smarcc1 PE=1 SV=2	0	16	15	114	6	1104	122.8	1377	114	15	0	1.405	0.598766	25.81	1.16	1.405	1.695
High	Master Protein	Q9EQP2	EH domain-containing protein 4 OS=Mus musculus GN=Ehd4 PE=1 SV=1	0	34	12	48	8	541	61.4	462	48	12	2	1.261	0.669692	11.89	1.16	1.491	1.261
High	Master Protein	P80316	T-complex protein 1 subunit epsilon OS=Mus musculus GN=Cct5 PE=1 SV=1	0	70	30	513	30	541	59.6	9293	513	30	0	1.106	0.827924	7.22	1.16	0.988	1.106
High	Master Protein	Q91YS8	Calcium/calmodulin-dependent protein kinase type 1 OS=Mus musculus GN=Camk1 PE=1 SV=1	0	23	6	26	5	374	41.6	746	26	6	0	1.189	0.922517	3.71	1.16	1.189	1.546
High	Master Protein	Q9CRD2	ER membrane protein complex subunit 2 OS=Mus musculus GN=Emc2 PE=1 SV=1	0	41	9	46	9	297	34.9	727	46	9	0	1.039	0.993902	1.1	1.159	1.039	1.032
High	Master Protein	Q8BJ05	Zinc finger CCCH domain-containing protein 14 OS=Mus musculus GN=Zc3h14 PE=1 SV=1	0	29	15	128	15	735	82.4	1492	128	15	0	1.058	0.993902	14.19	1.159	0.921	1.058
High	Master Protein	Q9CR00	26S proteasome non-ATPase regulatory subunit 9 OS=Mus musculus GN=Psmd9 PE=1 SV=1	0	36	6	51	6	222	24.7	1071	51	6	0	1.181	0.772607	2.7	1.159	1.181	1.412
High	Master Protein	P10639	Thioredoxin OS=Mus musculus GN=Txn PE=1 SV=3	0	52	5	92	5	105	11.7	2356	92	5	0	1.159	0.772239	9.27	1.159	1.087	1.377
High	Master Protein	Q5SQX6	Cytoplasmic FMR1-interacting protein 2 OS=Mus musculus GN=Cyfip2 PE=1 SV=2	0	36	36	285	22	1253	145.6	6525	285	36	14	1.12	0.885342	2.14	1.159	1.12	1.104
High	Master Protein	Q8BV13	COP9 signalosome complex subunit 7b OS=Mus musculus GN=Cops7b PE=1 SV=1	0	15	3	17	3	264	29.7	210	17	3	0	1.159	0.950293	32.56	1.159	0.657	1.414
High	Master Protein	Q8K274	Ketosamine-3-kinase OS=Mus musculus GN=Fn3krp PE=1 SV=2	0	29	7	58	7	309	34.4	1188	58	7	0	1.159	0.908198	31.09	1.159	0.916	1.418
High	Master Protein	F7AEH4	40S ribosomal protein S12 OS=Mus musculus GN=Rps12 PE=1 SV=1	0	69	9	140	9	137	15.2	2631	140	9	0	1.063	0.984558	13.31	1.159	0.889	1.063
High	Master Protein	Q8CHP8	Glycerol-3-phosphate phosphatase OS=Mus musculus GN=Pgp PE=1 SV=1	0	36	8	27	8	321	34.5	622	27	8	0	1.159	0.856949	2.43	1.159	0.885	1.178
High	Master Protein	Q9EQH3	Vacuolar protein sorting-associated protein 35 OS=Mus musculus GN=Vps35 PE=1 SV=1	0	40	28	324	27	796	91.7	6335	324	28	1	1.149	0.686083	1.3	1.159	1.045	1.149
High	Master Protein	P54729	NEDD8 ultimate buster 1 OS=Mus musculus GN=Nub1 PE=1 SV=2	0	23	10	41	10	614	70.3	758	41	10	0	1.158	0.876717	14.67	1.158	1.592	1.043
High	Master Protein	Q6NSR8	Probable aminopeptidase NPEPL1 OS=Mus musculus GN=Npepl1 PE=1 SV=1	0	26	7	21	7	524	55.9	140	21	7	0	1.262	0.838771	12.26	1.158	1.59	1.262
High	Master Protein	P50396	Rab GDP dissociation inhibitor alpha OS=Mus musculus GN=Gdi1 PE=1 SV=3	0	83	31	858	24	447	50.5	18226	858	31	7	1.158	0.607591	19.15	1.158	0.982	1.307
High	Master Protein	A0A0G2JE03	Anaphase-promoting complex subunit 5 OS=Mus musculus GN=Anapc5 PE=1 SV=1	0	17	8	22	7	719	80.8	373	22	8	0	1.158	0.915056	42.13	1.158	1.827	0.829
High	Master Protein	Q60649	Caseinolytic peptidase B protein homolog OS=Mus musculus GN=Clpb PE=1 SV=1	0	38	17	59	17	677	76	681	59	17	0	1.071	0.988026	11.93	1.158	0.973	1.071
High	Master Protein	Q8CJF9	Protein argonaute-3 OS=Mus musculus GN=Ago3 PE=2 SV=2	0	43	23	117	11	860	97.2	1306	117	23	0	1.09	0.969724	3.9	1.158	1.09	1.061
High	Master Protein	Q06180	Tyrosine-protein phosphatase non-receptor type 2 OS=Mus musculus GN=Ptpn2 PE=1 SV=2	0	34	11	62	11	406	47.3	696	62	11	0	1.157	0.87597	6.25	1.157	1.105	1.206
High	Master Protein	Q8WTY4	Anamorsin OS=Mus musculus GN=Ciapin1 PE=1 SV=1	0	55	9	106	9	309	33.4	2052	106	9	0	1.171	0.813315	1.67	1.157	1.171	1.285
High	Master Protein	Q5F2E8	Serine/threonine-protein kinase TAO1 OS=Mus musculus GN=Taok1 PE=1 SV=1	0	16	11	35	8	1001	116	477	35	11	1	1.157	0.896574	4.05	1.157	1.189	0.959
High	Master Protein	Q8BFS6	Serine/threonine-protein phosphatase CPPED1 OS=Mus musculus GN=Cpped1 PE=1 SV=1	0	29	5	19	5	312	35.2	417	19	5	0	1.157	0.918282	18.06	1.157	1.016	1.971
High	Master Protein	Q9D8E6	60S ribosomal protein L4 OS=Mus musculus GN=Rpl4 PE=1 SV=3	0	50	25	422	25	419	47.1	7546	422	25	0	1.157	0.609527	9.68	1.157	1.082	1.268
High	Master Protein	Q9CZD3	Glycine--tRNA ligase OS=Mus musculus GN=Gars PE=1 SV=1	0	31	19	184	19	729	81.8	4061	184	19	0	1.157	0.857464	1.7	1.157	1.144	1.481
High	Master Protein	P05201	Aspartate aminotransferase, cytoplasmic OS=Mus musculus GN=Got1 PE=1 SV=3	0	78	30	922	30	413	46.2	21902	922	30	0	1.157	0.611077	13.15	1.157	1.054	1.305
High	Master Protein	Q5SRX1	TOM1-like protein 2 OS=Mus musculus GN=Tom1l2 PE=1 SV=1	0	43	15	121	15	507	55.6	2435	121	15	0	1.157	0.868295	9.61	1.157	1.082	1.252
High	Master Protein	Q9CX80	Cytoglobin OS=Mus musculus GN=Cygb PE=1 SV=1	0	51	8	50	8	190	21.5	1148	50	8	0	1.248	0.644196	10.78	1.157	1.248	1.608
High	Master Protein	A0A0A0MQ79	Protein PRRC2C OS=Mus musculus GN=Prrc2c PE=1 SV=1	0	20	35	178	34	2844	310.5	2142	178	35	1	1.051	0.996172	14.94	1.157	1.051	0.906
High	Master Protein	Q8BGT8	Phytanoyl-CoA hydroxylase-interacting protein-like OS=Mus musculus GN=Phyhipl PE=1 SV=1	0	53	19	339	16	375	42.3	5906	339	19	3	1.075	0.933429	11.28	1.157	0.989	1.075
High	Master Protein	E9QP99	Golgin subfamily A member 3 OS=Mus musculus GN=Golga3 PE=1 SV=1	0	11	11	25	11	1487	167.2	449	25	11	0	1.156	0.868295	8.82	1.156	1.088	1.36
High	Master Protein	Q8R016	Bleomycin hydrolase OS=Mus musculus GN=Blmh PE=1 SV=1	0	57	23	264	23	455	52.5	2342	264	23	0	1.156	0.868295	6.55	1.156	0.995	1.207
High	Master Protein	P99029	Peroxiredoxin-5, mitochondrial OS=Mus musculus GN=Prdx5 PE=1 SV=2	0	57	11	385	11	210	21.9	8992	385	11	0	1.156	0.614534	12.71	1.156	1.057	1.464
High	Master Protein	Q9CZY3	Ubiquitin-conjugating enzyme E2 variant 1 OS=Mus musculus GN=Ube2v1 PE=1 SV=1	0	52	6	91	4	147	16.3	1722	91	6	3	1.156	0.874545	10.75	1.156	1.065	1.24
High	Master Protein	P60469	Liprin-alpha-3 OS=Mus musculus GN=Ppfia3 PE=1 SV=2	0	21	17	107	13	1194	133.3	1654	107	17	1	1.198	0.775539	5.16	1.156	1.322	1.198
High	Master Protein	Q91WA3	Histone deacetylase 11 OS=Mus musculus GN=Hdac11 PE=1 SV=1	0	27	10	38	10	347	39.1	395	38	10	0	1.156	0.918282	27.39	1.156	1.634	0.942
High	Master Protein	Q14C51	Pentatricopeptide repeat domain-containing protein 3, mitochondrial OS=Mus musculus GN=Ptcd3 PE=1 SV=2	0	13	6	14	6	685	77.7	109	14	6	0	1.301	0.691178	16.52	1.156	1.301	1.782
High	Master Protein	Q61598	Rab GDP dissociation inhibitor beta OS=Mus musculus GN=Gdi2 PE=1 SV=1	0	77	29	556	22	445	50.5	12442	556	29	0	1.155	0.655419	0.29	1.155	1.082	1.158
High	Master Protein	Q9D4G5	Processing of precursor 1, ribonuclease P/MRP family, (S. cerevisiae) OS=Mus musculus GN=Pop1 PE=1 SV=1	0	6	4	25	4	1015	114	247	25	4	0	1.13	0.959504	3.28	1.155	1.13	1.013
High	Master Protein	P15116	Cadherin-2 OS=Mus musculus GN=Cdh2 PE=1 SV=2	0	32	19	238	18	906	99.7	3607	238	19	1	1.129	0.849805	3.46	1.155	1.129	1.085
High	Master Protein	Q91Z49	UAP56-interacting factor OS=Mus musculus GN=Fyttd1 PE=1 SV=1	0	22	6	44	6	317	35.9	647	44	6	0	1.195	0.766262	4.93	1.155	1.3	1.195
High	Master Protein	Q9D1E6	Tubulin-folding cofactor B OS=Mus musculus GN=Tbcb PE=1 SV=2	0	50	10	34	10	244	27.4	336	34	10	0	1.155	0.868212	6.75	1.155	1.103	1.587
High	Master Protein	P40240	CD9 antigen OS=Mus musculus GN=Cd9 PE=1 SV=2	0	28	4	150	4	226	25.2	4149	150	4	0	1.12	0.907464	4.67	1.155	0.765	1.12
High	Master Protein	Q3UH60	Disco-interacting protein 2 homolog B OS=Mus musculus GN=Dip2b PE=1 SV=1	0	20	20	93	19	1574	171	1908	93	20	1	0.917	0.860343	0.15	1.155	0.916	0.917
High	Master Protein	A0A0R4J034	MCG129810, isoform CRA_c OS=Mus musculus GN=Pdxdc1 PE=1 SV=1	0	27	13	48	13	789	87.4	819	48	13	0	1.155	0.863236	4.27	1.155	1.122	1.551
High	Master Protein	Q9D1A2	Cytosolic non-specific dipeptidase OS=Mus musculus GN=Cndp2 PE=1 SV=1	0	66	24	216	24	475	52.7	4609	216	24	0	1.155	0.753594	35.81	1.155	0.876	1.508
High	Master Protein	Q9QXY6	EH domain-containing protein 3 OS=Mus musculus GN=Ehd3 PE=1 SV=2	0	49	22	161	13	535	60.8	1979	161	22	7	1.237	0.451417	8.33	1.154	1.306	1.237
High	Master Protein	G3XA20	Glutamate receptor-interacting protein 2 OS=Mus musculus GN=Grip2 PE=1 SV=1	0	3	2	9	2	1042	112.2	132	9	2	0	1.154	0.992378	15.4	1.154	1.034	1.327
High	Master Protein	F6VQ81	Tumor protein D54 (Fragment) OS=Mus musculus GN=Tpd52l2 PE=1 SV=1	0	70	10	75	2	161	17.7	1626	75	10	0	1.118	0.970243	1.04	1.154	1.11	1.118
High	Master Protein	D3YWH4	Transmembrane 9 superfamily member (Fragment) OS=Mus musculus GN=Tm9sf1 PE=1 SV=1	0	12	4	8	4	484	54.8	71	8	4	0	1.007	0.999996	3.25	1.154	1.007	0.985
High	Master Protein	P63073	Eukaryotic translation initiation factor 4E OS=Mus musculus GN=Eif4e PE=1 SV=1	0	46	10	76	10	217	25	1057	76	10	0	1.071	0.9873	11.53	1.154	0.939	1.071
High	Master Protein	P70445	Eukaryotic translation initiation factor 4E-binding protein 2 OS=Mus musculus GN=Eif4ebp2 PE=1 SV=1	0	50	3	24	3	120	12.9	311	24	3	0	1.154	0.958186	3.13	1.154	0.979	1.178
High	Master Protein	F6UIS1	Endoplasmic reticulum-Golgi intermediate compartment protein 3 (Fragment) OS=Mus musculus GN=Ergic3 PE=1 SV=8	0	30	6	44	6	246	28	133	44	6	0	0.92	0.874222	0.12	1.154	0.919	0.92
High	Master Protein	Q60865	Caprin-1 OS=Mus musculus GN=Caprin1 PE=1 SV=2	0	40	16	124	16	707	78.1	3236	124	16	0	1.008	0.98287	4.94	1.154	0.975	1.008
High	Master Protein	P56960	Exosome component 10 OS=Mus musculus GN=Exosc10 PE=1 SV=2	0	32	19	88	19	887	100.9	875	88	19	0	1.154	0.894632	8.87	1.154	1.223	0.98
High	Master Protein	Q3UQS2	Leucine-rich single-pass membrane protein 1 OS=Mus musculus GN=Lsmem1 PE=1 SV=1	0	5	2	37	2	128	14.2	421	37	2	0	1.153	0.659105	19.99	1.153	0.922	1.309
High	Master Protein	Q91ZA3	Propionyl-CoA carboxylase alpha chain, mitochondrial OS=Mus musculus GN=Pcca PE=1 SV=2	0	39	21	68	21	724	79.9	911	68	21	0	1.153	0.894632	7.78	1.153	1.093	1.226
High	Master Protein	Q7TMC8	L-fucose kinase OS=Mus musculus GN=Fuk PE=1 SV=1	0	17	11	21	11	1090	119.2	297	21	11	0	1.153	0.873214	13.89	1.153	1.858	1.045
High	Master Protein	Q9Z2Y3	Homer protein homolog 1 OS=Mus musculus GN=Homer1 PE=1 SV=2	0	36	11	43	10	366	41.4	755	43	11	1	1.153	0.868786	13.43	1.153	1.593	1.049
High	Master Protein	Q3TCR7	Dynamin-2 OS=Mus musculus GN=Dnm2 PE=1 SV=1	0	33	27	252	10	869	97.9	4753	252	27	0	1.163	0.855493	1.22	1.153	1.163	1.319
High	Master Protein	F8WJK8	Hsc70-interacting protein OS=Mus musculus GN=St13 PE=1 SV=1	0	28	12	150	12	362	40.5	5451	150	12	0	1.151	0.679914	0.23	1.153	0.993	1.151
High	Master Protein	Q9D6T0	Nitric oxide synthase-interacting protein OS=Mus musculus GN=Nosip PE=1 SV=1	0	47	9	45	9	301	33.2	1275	45	9	0	1.057	0.988622	13.41	1.152	1.057	0.891
High	Master Protein	Q9JK23	Proteasome assembly chaperone 1 OS=Mus musculus GN=Psmg1 PE=1 SV=1	0	8	2	8	2	289	33.1	70	8	2	0	1.115	0.988622	4.47	1.152	1.082	1.115
High	Master Protein	A0A0R4J1I6	Nuclear pore membrane glycoprotein 210 OS=Mus musculus GN=Nup210 PE=1 SV=1	0	22	23	132	23	1842	199.4	1947	132	23	0	1.027	0.993902	0.41	1.152	1.024	1.027
High	Master Protein	Q9JIY5	Serine protease HTRA2, mitochondrial OS=Mus musculus GN=Htra2 PE=1 SV=2	0	47	14	115	14	458	49.3	1590	115	14	0	1.152	0.914774	2.73	1.152	1.173	1.092
High	Master Protein	Q9D1K7	UPF0687 protein C20orf27 homolog OS=Mus musculus PE=1 SV=3	0	17	2	18	2	174	19.5	134	18	2	0	1.152	0.984017	17.18	1.152	1.019	1.71
High	Master Protein	P68368	Tubulin alpha-4A chain OS=Mus musculus GN=Tuba4a PE=1 SV=1	0	81	34	9051	10	448	49.9	207735	9051	34	1	1.126	0.750007	3.45	1.152	0.9	1.126
High	Master Protein	P37040	NADPH--cytochrome P450 reductase OS=Mus musculus GN=Por PE=1 SV=2	0	58	30	337	30	678	77	6527	337	30	0	1.152	0.736549	5.35	1.152	1.193	1.103
High	Master Protein	Q6PFA2	Clathrin light chain OS=Mus musculus GN=Clta PE=1 SV=1	0	35	10	231	1	218	23.6	1733	231	10	0	1.152	0.932345	8.07	1.152	1.014	1.214
High	Master Protein	P56959	RNA-binding protein FUS OS=Mus musculus GN=Fus PE=1 SV=1	0	28	13	744	11	518	52.6	11543	744	13	2	0.999	0.999996	19.58	1.151	0.999	0.821
High	Master Protein	Q8BMS1	Trifunctional enzyme subunit alpha, mitochondrial OS=Mus musculus GN=Hadha PE=1 SV=1	0	35	21	169	21	763	82.6	4337	169	21	0	0.967	0.914154	6.56	1.151	0.926	0.967
High	Master Protein	E9PZM4	Chromodomain-helicase-DNA-binding protein 2 OS=Mus musculus GN=Chd2 PE=1 SV=1	0	7	9	24	6	1827	210.7	264	24	9	2	1.136	0.907464	1.86	1.151	1.136	0.901
High	Master Protein	O88844	Isocitrate dehydrogenase [NADP] cytoplasmic OS=Mus musculus GN=Idh1 PE=1 SV=2	0	72	24	330	24	414	46.6	7586	330	24	0	1.151	0.644196	1.33	1.151	0.976	1.161
High	Master Protein	P61961	Ubiquitin-fold modifier 1 OS=Mus musculus GN=Ufm1 PE=1 SV=1	0	51	2	26	2	85	9.1	398	26	2	0	1.15	0.894632	6.27	1.15	0.978	1.199
High	Master Protein	Q8BU11	TOX high mobility group box family member 4 OS=Mus musculus GN=Tox4 PE=1 SV=3	0	10	4	11	3	619	65.9	325	11	4	1	1.127	0.966323	3.09	1.15	1.127	1.058
High	Master Protein	Q9D0R2	Threonine--tRNA ligase, cytoplasmic OS=Mus musculus GN=Tars PE=1 SV=2	0	50	32	238	31	722	83.3	4314	238	32	1	1.15	0.80469	5.99	1.15	1.104	1.353
High	Master Protein	Q5EG47	5'-AMP-activated protein kinase catalytic subunit alpha-1 OS=Mus musculus GN=Prkaa1 PE=1 SV=2	0	23	9	84	8	559	63.9	1150	84	9	1	1.07	0.984017	2.7	1.15	1.05	1.07
High	Master Protein	F8VPK0	Tetratricopeptide repeat domain 37 OS=Mus musculus GN=Ttc37 PE=1 SV=1	0	9	9	30	9	1563	173.8	607	30	9	0	1.286	0.659036	11.45	1.15	1.385	1.286
High	Master Protein	Q6P542	ATP-binding cassette sub-family F member 1 OS=Mus musculus GN=Abcf1 PE=1 SV=1	0	23	13	86	12	837	94.9	1500	86	13	1	0.993	0.982705	20.21	1.15	0.993	0.825
High	Master Protein	Q5SU71	E3 ubiquitin/ISG15 ligase TRIM25 OS=Mus musculus GN=Trim25 PE=1 SV=1	0	22	9	32	9	626	70.7	268	32	9	0	1.15	0.884255	3.01	1.15	1.176	1.127
High	Master Protein	D3YXZ3	Kinesin light chain 2 OS=Mus musculus GN=Klc2 PE=1 SV=1	0	26	11	64	4	617	68.1	1270	64	11	0	1.014	0.993902	4.59	1.15	0.983	1.014
High	Master Protein	P0DP26	Calmodulin-1 OS=Mus musculus GN=Calm1 PE=1 SV=1	0	60	9	571	8	149	16.8	18041	571	9	1	1.15	0.648661	9.33	1.15	1.077	1.442
High	Master Protein	A2AIX1	SEC16 homolog A, endoplasmic reticulum export factor OS=Mus musculus GN=Sec16a PE=1 SV=1	0	16	23	165	23	2377	256.3	1892	165	23	0	1.034	0.993902	7.48	1.15	1.034	0.982
High	Master Protein	Q9D7S9	Charged multivesicular body protein 5 OS=Mus musculus GN=Chmp5 PE=1 SV=1	0	24	3	21	3	219	24.6	178	21	3	0	1.149	0.936934	24.9	1.149	1.343	0.905
High	Master Protein	F8VPN4	Amylo-1,6-glucosidase, 4-alpha-glucanotransferase OS=Mus musculus GN=Agl PE=1 SV=1	0	19	20	54	20	1532	174.2	814	54	20	0	1.378	0.218618	7.98	1.149	1.378	1.452
High	Master Protein	Q3UMT1	Protein phosphatase 1 regulatory subunit 12C OS=Mus musculus GN=Ppp1r12c PE=1 SV=1	0	16	8	53	2	782	84.6	428	53	8	6	1.063	0.993902	3.93	1.149	1.063	1.035
High	Master Protein	P80315	T-complex protein 1 subunit delta OS=Mus musculus GN=Cct4 PE=1 SV=3	0	70	29	426	29	539	58	11497	426	29	0	1.088	0.888909	8.4	1.149	1.012	1.088
High	Master Protein	Q9D820	Prolyl-tRNA synthetase associated domain-containing protein 1 OS=Mus musculus GN=Prorsd1 PE=1 SV=1	0	28	3	20	3	169	18.9	405	20	3	0	1.375	0.499279	24.38	1.149	1.375	1.647
High	Master Protein	Q9CQ20	Mid1-interacting protein 1 OS=Mus musculus GN=Mid1ip1 PE=1 SV=1	0	40	3	14	3	182	20.3	149	14	3	0	1.159	0.981722	1.25	1.149	1.159	1.759
High	Master Protein	G5E8T6	Membrane associated guanylate kinase, WW and PDZ domain containing 3, isoform CRA_a OS=Mus musculus GN=Magi3 PE=1 SV=1	0	17	18	49	18	1476	161.5	484	49	18	0	1.149	0.883165	1.89	1.149	1.163	0.878
High	Master Protein	Q9Z1S5	Neuronal-specific septin-3 OS=Mus musculus GN=Sept3 PE=1 SV=2	0	53	13	122	13	350	40	2010	122	13	0	1.148	0.8637	4.35	1.148	1.072	1.182
High	Master Protein	Q91VB8	Alpha globin 1 OS=Mus musculus GN=Hba-a1 PE=1 SV=1	0	84	10	1048	10	142	15.1	23746	1048	10	0	1.148	0.654736	34.69	1.148	0.88	1.576
High	Master Protein	Q3UYN2	Copine-6 OS=Mus musculus GN=Cpne6 PE=1 SV=1	0	31	11	59	10	556	61.6	763	59	11	1	1.148	0.890761	12.3	1.148	0.925	1.243
High	Master Protein	Q6IQX8	Zinc finger protein 219 OS=Mus musculus GN=Zfp219 PE=1 SV=1	0	23	8	21	8	726	77.7	269	21	8	0	0.914	0.835629	7.12	1.148	0.914	0.872
High	Master Protein	Q8BHW2	Protein OSCP1 OS=Mus musculus GN=Oscp1 PE=1 SV=1	0	20	5	8	5	379	43.2	242	8	5	0	1.102	0.993902	6.14	1.148	0.772	1.102
High	Master Protein	Q9CPY7	Cytosol aminopeptidase OS=Mus musculus GN=Lap3 PE=1 SV=3	0	49	15	94	15	519	56.1	2073	94	15	0	1.148	0.903136	8.71	1.148	1.08	1.25
High	Master Protein	A0A140LHA2	Mitotic checkpoint protein BUB3 OS=Mus musculus GN=Bub3 PE=1 SV=1	0	56	12	173	12	324	36.7	3227	173	12	0	1.033	0.999996	16.43	1.148	1.033	0.895
High	Master Protein	A6ZI44	Fructose-bisphosphate aldolase OS=Mus musculus GN=Aldoa PE=1 SV=1	0	85	33	2348	10	418	45.1	47391	2348	33	27	1.147	0.659152	30.6	1.147	0.793	1.384
High	Master Protein	S4R1W5	RNA-binding motif protein 6 OS=Mus musculus GN=Rbm6 PE=1 SV=1	0	16	15	58	13	1118	128.3	648	58	15	1	1.062	0.9873	11.9	1.147	1.062	0.958
High	Master Protein	Q4KWH5	1-phosphatidylinositol 4,5-bisphosphate phosphodiesterase eta-1 OS=Mus musculus GN=Plch1 PE=2 SV=1	0	8	9	32	8	1682	187.6	327	32	9	0	1.006	0.996172	8.03	1.147	1.006	0.952
High	Master Protein	Q3ULD5	Methylcrotonoyl-CoA carboxylase beta chain, mitochondrial OS=Mus musculus GN=Mccc2 PE=1 SV=1	0	23	9	40	9	563	61.3	644	40	9	0	1.054	0.993902	5.15	1.147	1.054	1.017
High	Master Protein	Q91VW5	Golgin subfamily A member 4 OS=Mus musculus GN=Golga4 PE=1 SV=2	0	15	22	92	22	2238	257.4	1033	92	22	0	1.083	0.976363	8.67	1.147	1.083	0.942
High	Master Protein	Q922L6	Negative elongation factor D OS=Mus musculus GN=Nelfcd PE=1 SV=2	0	15	5	14	5	591	66.2	301	14	5	0	1.116	0.993902	4.13	1.147	1.116	1.03
High	Master Protein	P61161	Actin-related protein 2 OS=Mus musculus GN=Actr2 PE=1 SV=1	0	42	13	101	13	394	44.7	1837	101	13	0	1.164	0.894632	2.26	1.147	1.219	1.164
High	Master Protein	P62908	40S ribosomal protein S3 OS=Mus musculus GN=Rps3 PE=1 SV=1	0	80	22	381	22	243	26.7	5507	381	22	0	1.046	0.976363	0.72	1.147	1.046	1.041
High	Master Protein	Q61792	LIM and SH3 domain protein 1 OS=Mus musculus GN=Lasp1 PE=1 SV=1	0	58	13	242	12	263	30	3508	242	13	0	1.147	0.688003	3.16	1.147	1.122	1.239
High	Master Protein	Q80XU3	Nuclear ubiquitous casein and cyclin-dependent kinase substrate 1 OS=Mus musculus GN=Nucks1 PE=1 SV=1	0	25	4	41	4	234	26.3	984	41	4	0	1.11	0.955218	4.83	1.147	1.11	0.644
High	Master Protein	Q3UN04	Ubiquitin carboxyl-terminal hydrolase 30 OS=Mus musculus GN=Usp30 PE=1 SV=1	0	8	3	8	3	517	58.2	67	8	3	0	1.096	0.993902	0.06	1.146	1.096	1.095
High	Master Protein	P97807	Fumarate hydratase, mitochondrial OS=Mus musculus GN=Fh PE=1 SV=3	0	51	17	295	17	507	54.3	8236	295	17	0	1.166	0.651597	2.53	1.146	1.166	1.513
High	Master Protein	Q8R1N4	NudC domain-containing protein 3 OS=Mus musculus GN=Nudcd3 PE=1 SV=3	0	34	8	30	8	363	40.9	295	30	8	0	1.146	0.877318	20.43	1.146	0.889	1.304
High	Master Protein	Q924Z4	Ceramide synthase 2 OS=Mus musculus GN=Cers2 PE=1 SV=1	0	5	1	4	1	380	45	62	4	1	0	1.146	0.981178	20.4	1.146	1.304	0.982
High	Master Protein	Q7TMI3	E3 ubiquitin-protein ligase UHRF2 OS=Mus musculus GN=Uhrf2 PE=1 SV=1	0	22	12	34	12	803	90	404	34	12	0	1.146	0.895524	14.33	1.146	1.035	1.465
High	Master Protein	E9Q5F9	Histone-lysine N-methyltransferase SETD2 OS=Mus musculus GN=Setd2 PE=1 SV=1	0	6	9	21	9	2537	285.5	168	21	9	0	1.146	0.95191	4.52	1.146	1.181	0.991
High	Master Protein	Q99N15	17beta-hydroxysteroid dehydrogenase type 10/short chain L-3-hydroxyacyl-CoA dehydrogenase OS=Mus musculus GN=Hsd17b10 PE=1 SV=1	0	67	12	105	12	261	27.3	2710	105	12	0	1.146	0.895299	2.82	1.146	1.023	1.168
High	Master Protein	Q6P5C5	Single-strand selective monofunctional uracil DNA glycosylase OS=Mus musculus GN=Smug1 PE=1 SV=1	0	35	6	6	6	279	30.6	93	6	6	0	1.146	0.933429	14.86	1.146	1.268	1.031
High	Master Protein	E9PYJ7	Membrane-associated phosphatidylinositol transfer protein 2 OS=Mus musculus GN=Pitpnm2 PE=1 SV=1	0	20	18	55	16	1331	147.5	568	55	18	0	1.146	0.876255	28.64	1.146	1.975	0.924
High	Master Protein	Q6Y685	Transforming acidic coiled-coil-containing protein 1 OS=Mus musculus GN=Tacc1 PE=1 SV=1	0	7	3	9	3	774	83.9	96	9	3	0	0.813	0.854695	1.59	1.146	0.805	0.813
High	Master Protein	P62897	Cytochrome c, somatic OS=Mus musculus GN=Cycs PE=1 SV=2	0	62	8	225	8	105	11.6	6620	225	8	0	1.146	0.665815	3.34	1.146	1.43	1.12
High	Master Protein	Q60829	Protein phosphatase 1 regulatory subunit 1B OS=Mus musculus GN=Ppp1r1b PE=1 SV=2	0	52	5	30	5	194	21.8	296	30	5	0	1.146	0.942286	18.43	1.146	0.898	1.288
High	Master Protein	O55186	CD59A glycoprotein OS=Mus musculus GN=Cd59a PE=2 SV=1	0	21	2	15	2	123	13.6	628	15	2	0	1.145	0.888865	33.32	1.145	1.65	0.888
High	Master Protein	P00397	Cytochrome c oxidase subunit 1 OS=Mus musculus GN=Mtco1 PE=1 SV=2	0	14	5	235	5	514	56.9	1791	235	5	0	1.11	0.888865	4.76	1.145	1.11	0.9
High	Master Protein	P59481	VIP36-like protein OS=Mus musculus GN=Lman2l PE=1 SV=1	0	38	11	57	11	347	39.9	819	57	11	0	1.073	0.985275	9.94	1.145	1.073	0.96
High	Master Protein	Q9DBG6	Dolichyl-diphosphooligosaccharide--protein glycosyltransferase subunit 2 OS=Mus musculus GN=Rpn2 PE=1 SV=1	0	45	19	369	19	631	69	10412	369	19	0	1.024	0.993902	5.19	1.145	1.024	0.989
High	Master Protein	Q3TDT0	Tripartite motif-containing protein 3 OS=Mus musculus GN=Trim3 PE=1 SV=1	0	43	19	76	17	717	78.2	1745	76	19	0	1.181	0.86732	3.12	1.145	1.205	1.181
High	Master Protein	Q9JLB2	MAGUK p55 subfamily member 5 OS=Mus musculus GN=Mpp5 PE=1 SV=1	0	35	15	52	15	675	77.2	562	52	15	0	0.975	0.967561	7.89	1.145	0.925	0.975
High	Master Protein	P49070	Calcium signal-modulating cyclophilin ligand OS=Mus musculus GN=Camlg PE=1 SV=2	0	44	8	85	8	294	32.5	859	85	8	0	1.145	0.894632	15.52	1.145	0.917	1.264
High	Master Protein	E9Q4Q2	Splicing factor 1 OS=Mus musculus GN=Sf1 PE=1 SV=1	0	32	13	221	13	548	59.7	2713	221	13	0	1.128	0.765895	2.18	1.144	1.128	0.918
High	Master Protein	F6PWU6	Upstream stimulatory factor 2 (Fragment) OS=Mus musculus GN=Usf2 PE=1 SV=1	0	17	4	14	3	293	31.8	114	14	4	1	1.008	0.993902	20.06	1.144	1.008	0.867
High	Master Protein	Q922M7	Ashwin OS=Mus musculus PE=1 SV=1	0	34	6	14	6	232	26	113	14	6	0	0.973	0.980021	22.21	1.144	0.804	0.973
High	Master Protein	Q91YE7	RNA-binding protein 5 OS=Mus musculus GN=Rbm5 PE=1 SV=1	0	9	6	13	4	815	92.3	154	13	6	0	0.955	0.979115	7.81	1.144	0.908	0.955
High	Master Protein	Q8CCS6	Polyadenylate-binding protein 2 OS=Mus musculus GN=Pabpn1 PE=1 SV=3	0	66	9	149	3	302	32.3	2873	149	9	0	0.962	0.95455	23.58	1.144	0.794	0.962
High	Master Protein	Q6PHQ8	N-alpha-acetyltransferase 35, NatC auxiliary subunit OS=Mus musculus GN=Naa35 PE=1 SV=1	0	14	6	14	6	725	83.3	259	14	6	0	1.117	0.975388	3.51	1.144	0.989	1.117
High	Master Protein	Q99KW9	T-cell immunomodulatory protein OS=Mus musculus GN=Itfg1 PE=1 SV=2	0	18	5	29	5	610	67.4	223	29	5	0	1.144	0.949235	28.66	1.144	1.365	0.862
High	Master Protein	Q8R0F6	Integrin-linked kinase-associated serine/threonine phosphatase 2C OS=Mus musculus GN=Ilkap PE=1 SV=1	0	32	10	35	10	392	42.7	190	35	10	0	1.013	0.993902	19.04	1.144	0.608	1.013
High	Master Protein	Q9DBG3	AP-2 complex subunit beta OS=Mus musculus GN=Ap2b1 PE=1 SV=1	0	56	48	923	27	937	104.5	21404	923	48	25	1.033	0.984017	9.72	1.144	0.965	1.033
High	Master Protein	E9Q7U2	Calcium-binding and coiled-coil domain-containing protein 1 OS=Mus musculus GN=Calcoco1 PE=1 SV=1	0	18	9	58	9	633	70.9	652	58	9	0	1.143	0.892573	0.58	1.143	1.148	0.984
High	Master Protein	Q9ET01	Glycogen phosphorylase, liver form OS=Mus musculus GN=Pygl PE=1 SV=4	0	36	25	331	17	850	97.4	5492	331	25	0	1.143	0.894632	2.8	1.143	1.121	1.815
High	Master Protein	Q9CXW2	28S ribosomal protein S22, mitochondrial OS=Mus musculus GN=Mrps22 PE=1 SV=1	0	24	6	30	6	359	41.2	287	30	6	0	1.133	0.944276	1.29	1.142	0.721	1.133
High	Master Protein	Q8BU30	Isoleucine--tRNA ligase, cytoplasmic OS=Mus musculus GN=Iars PE=1 SV=2	0	32	27	148	27	1262	144.2	2100	148	27	0	1.142	0.937919	8.25	1.142	1.549	1.079
High	Master Protein	G3X9K3	Brefeldin A-inhibited guanine nucleotide-exchange protein 1 OS=Mus musculus GN=Arfgef1 PE=1 SV=1	0	23	29	172	20	1846	208.4	2033	172	29	0	1.142	0.804971	2.58	1.142	1.201	1.122
High	Master Protein	Q9QZA0	Carbonic anhydrase 5B, mitochondrial OS=Mus musculus GN=Ca5b PE=1 SV=2	0	29	7	22	7	317	36.6	307	22	7	0	1.142	0.892573	2.73	1.142	1.121	1.387
High	Master Protein	Q9JIG7	Coiled-coil domain-containing protein 22 OS=Mus musculus GN=Ccdc22 PE=1 SV=1	0	20	9	41	9	627	70.8	692	41	9	0	1.041	0.997037	9.18	1.142	0.977	1.041
High	Master Protein	Q52KR3	Protein prune homolog 2 OS=Mus musculus GN=Prune2 PE=1 SV=2	0	6	11	44	11	3084	339.3	451	44	11	0	1.142	0.894632	12.59	1.142	1.045	1.529
High	Master Protein	Q9WUR9	Adenylate kinase 4, mitochondrial OS=Mus musculus GN=Ak4 PE=1 SV=1	0	53	8	63	8	223	25	870	63	8	0	1.142	0.930091	17.61	1.142	1.006	1.336
High	Master Protein	Q9ERA0	Alpha-globin transcription factor CP2 OS=Mus musculus GN=Tfcp2 PE=1 SV=1	0	19	6	55	5	502	57	543	55	6	0	1.096	0.967506	0.21	1.141	1.096	1.094
High	Master Protein	G3X9U2	Zinc finger protein 446 OS=Mus musculus GN=Zfp446 PE=1 SV=1	0	4	1	7	1	423	47.2	77	7	1	0	1.141	0.990989	14.16	1.141	1.032	1.271
High	Master Protein	P35700	Peroxiredoxin-1 OS=Mus musculus GN=Prdx1 PE=1 SV=1	0	73	14	506	13	199	22.2	8137	506	14	1	1.141	0.686927	7.96	1.141	0.974	1.203
High	Master Protein	P09411	Phosphoglycerate kinase 1 OS=Mus musculus GN=Pgk1 PE=1 SV=4	0	81	32	2394	27	417	44.5	62577	2394	32	6	1.141	0.687424	15.61	1.141	1.021	1.328
High	Master Protein	Q8VDK1	Nitrilase homolog 1 OS=Mus musculus GN=Nit1 PE=1 SV=2	0	43	9	30	9	323	35.7	391	30	9	0	1.273	0.533538	15.34	1.141	1.273	1.555
High	Master Protein	Q8VHI6	Wiskott-Aldrich syndrome protein family member 3 OS=Mus musculus GN=Wasf3 PE=1 SV=1	0	24	7	62	7	501	55.2	876	62	7	0	0.855	0.496379	4.6	1.141	0.855	0.829
High	Master Protein	O88907	E3 SUMO-protein ligase PIAS1 OS=Mus musculus GN=Pias1 PE=1 SV=2	0	14	5	14	4	651	71.6	201	14	5	1	1.141	0.949158	8.29	1.141	1.205	1.002
High	Master Protein	P61600	N-alpha-acetyltransferase 20 OS=Mus musculus GN=Naa20 PE=1 SV=1	0	31	4	10	4	178	20.4	60	10	4	0	1.051	0.993902	12.69	1.141	1.051	0.79
High	Master Protein	Q91X21	Uncharacterized protein KIAA2013 OS=Mus musculus GN=Kiaa2013 PE=1 SV=1	0.002	1	1	6	1	634	69.4	50	6	1	0	1.14	0.984017	17.65	1.14	1.342	1.005
High	Master Protein	Q08331	Calretinin OS=Mus musculus GN=Calb2 PE=1 SV=3	0	64	18	377	17	271	31.4	7561	377	18	1	1.14	0.69034	16.15	1.14	1.016	1.529
High	Master Protein	Q8JZP2	Synapsin-3 OS=Mus musculus GN=Syn3 PE=1 SV=2	0	30	10	46	9	579	63.3	665	46	10	0	1.127	0.922553	1.79	1.14	1.127	1.029
High	Master Protein	Q9QYS9	Protein quaking OS=Mus musculus GN=Qki PE=1 SV=1	0	19	4	11	4	341	37.6	184	11	4	0	1.14	0.939422	15.2	1.14	0.947	1.257
High	Master Protein	Q8R0G9	Nuclear pore complex protein Nup133 OS=Mus musculus GN=Nup133 PE=1 SV=2	0	24	16	64	16	1155	128.5	869	64	16	0	1.14	0.913276	3.79	1.14	1.169	0.989
High	Master Protein	Q8BVZ5	Interleukin-33 OS=Mus musculus GN=Il33 PE=1 SV=1	0	25	6	17	6	266	30	309	17	6	0	1.14	0.923374	13.44	1.14	1.008	1.243
High	Master Protein	P53995	Anaphase-promoting complex subunit 1 OS=Mus musculus GN=Anapc1 PE=1 SV=2	0	14	15	59	15	1944	215.9	694	59	15	0	1.141	0.90094	0.17	1.14	1.141	1.264
High	Master Protein	Q9WV69	Dematin OS=Mus musculus GN=Dmtn PE=1 SV=1	0	23	6	46	6	405	45.4	277	46	6	0	1.151	0.877525	1.52	1.14	1.43	1.151
High	Master Protein	P40336	Vacuolar protein sorting-associated protein 26A OS=Mus musculus GN=Vps26a PE=1 SV=1	0	26	6	25	6	327	38.1	786	25	6	0	1.067	0.984558	4.21	1.14	1.037	1.067
High	Master Protein	Q8VE18	Protein SMG8 OS=Mus musculus GN=Smg8 PE=1 SV=1	0	8	5	13	5	991	109.6	185	13	5	0	1.139	0.984017	17.02	1.139	0.539	1.27
High	Master Protein	Q8VCQ3	Nuclear receptor-binding factor 2 OS=Mus musculus GN=Nrbf2 PE=1 SV=1	0	15	3	25	3	287	32.5	276	25	3	0	1.139	0.984017	16.08	1.139	1.015	1.316
High	Master Protein	Q80UJ7	Rab3 GTPase-activating protein catalytic subunit OS=Mus musculus GN=Rab3gap1 PE=1 SV=4	0	30	22	110	22	981	110.1	1865	110	22	0	1.18	0.875815	4.15	1.139	1.213	1.18
High	Master Protein	A0A0G2JEG8	Amphiphysin OS=Mus musculus GN=Amph PE=1 SV=1	0	50	28	556	27	690	75.3	13508	556	28	1	1.067	0.933429	5.99	1.139	1.024	1.067
High	Master Protein	P24668	Cation-dependent mannose-6-phosphate receptor OS=Mus musculus GN=M6pr PE=1 SV=1	0	24	5	29	5	278	31.2	704	29	5	0	1.076	0.991621	8.68	1.139	1.076	0.979
High	Master Protein	P50427	Steryl-sulfatase OS=Mus musculus GN=Sts PE=1 SV=1	0	8	4	14	4	624	66.5	251	14	4	0	1.226	0.838095	10.57	1.139	1.891	1.226
High	Master Protein	Q9CUX1	52 kDa repressor of the inhibitor of the protein kinase OS=Mus musculus GN=Thap12 PE=2 SV=2	0	13	5	18	5	758	87	341	18	5	0	1.056	0.999849	11.66	1.139	1.056	0.877
High	Master Protein	P0C7M9	C-type lectin domain family 2 member L OS=Mus musculus GN=Clec2l PE=1 SV=1	0	16	2	24	2	211	23.6	416	24	2	0	1.138	0.985275	13.55	1.138	1.034	1.601
High	Master Protein	P10852	4F2 cell-surface antigen heavy chain OS=Mus musculus GN=Slc3a2 PE=1 SV=1	0	49	25	452	25	526	58.3	14668	452	25	0	1.138	0.70072	9.31	1.138	0.947	1.21
High	Master Protein	Q99JR8	SWI/SNF-related matrix-associated actin-dependent regulator of chromatin subfamily D member 2 OS=Mus musculus GN=Smarcd2 PE=1 SV=2	0	30	11	59	9	531	59	1020	59	11	1	1.008	0.993902	7.24	1.138	1.008	0.959
High	Master Protein	Q6IRU2	Tropomyosin alpha-4 chain OS=Mus musculus GN=Tpm4 PE=1 SV=3	0	49	11	57	9	248	28.5	760	57	11	0	1.138	0.895299	23.22	1.138	1.588	0.96
High	Master Protein	Q8VBX6	Multiple PDZ domain protein OS=Mus musculus GN=Mpdz PE=1 SV=2	0	23	27	91	27	2055	218.6	1463	91	27	0	1.012	0.985275	5.07	1.138	0.977	1.012
High	Master Protein	B1AZP2	Disks large-associated protein 4 OS=Mus musculus GN=Dlgap4 PE=1 SV=1	0	22	13	81	13	992	108	846	81	13	0	1.138	0.894997	4.28	1.138	1.048	1.171
High	Master Protein	Q60749	KH domain-containing, RNA-binding, signal transduction-associated protein 1 OS=Mus musculus GN=Khdrbs1 PE=1 SV=2	0	29	11	569	8	443	48.3	8187	569	11	4	0.949	0.926475	6.2	1.138	0.911	0.949
High	Master Protein	Q8BGD8	Cytochrome c oxidase assembly factor 6 homolog OS=Mus musculus GN=Coa6 PE=1 SV=1	0.002	19	1	8	1	79	9.3	75	8	1	0	1.253	0.916864	13.57	1.138	1.698	1.253
High	Master Protein	Q8BX94	Oxysterol-binding protein-related protein 2 OS=Mus musculus GN=Osbpl2 PE=1 SV=1	0	22	7	34	7	484	55.3	663	34	7	0	1.242	0.616135	12.48	1.138	1.242	1.484
High	Master Protein	Q3UC65	Arginine/serine-rich protein 1 OS=Mus musculus GN=Rsrp1 PE=1 SV=1	0	5	1	11	1	298	34.5	328	11	1	0	1.138	0.975435	63.25	1.138	1.623	0.644
High	Master Protein	P70663	SPARC-like protein 1 OS=Mus musculus GN=Sparcl1 PE=1 SV=3	0	13	5	26	5	650	72.2	289	26	5	0	0.749	0.535125	0.94	1.138	0.745	0.749
High	Master Protein	Q64378	Peptidyl-prolyl cis-trans isomerase FKBP5 OS=Mus musculus GN=Fkbp5 PE=1 SV=1	0	28	9	29	9	456	50.9	297	29	9	0	1.121	0.931388	2.17	1.138	1.121	0.991
High	Master Protein	Q6P5F9	Exportin-1 OS=Mus musculus GN=Xpo1 PE=1 SV=1	0	45	40	496	40	1071	123	9624	496	40	0	1.137	0.704198	0.93	1.137	1.074	1.144
High	Master Protein	Q4PJX1	Protein odr-4 homolog OS=Mus musculus GN=Odr4 PE=1 SV=2	0	22	8	28	8	447	50	246	28	8	0	1.137	0.910267	3.49	1.137	0.996	1.164
High	Master Protein	P99026	Proteasome subunit beta type-4 OS=Mus musculus GN=Psmb4 PE=1 SV=1	0	48	8	95	8	264	29.1	2465	95	8	0	1.103	0.869114	4.53	1.137	1.027	1.103
High	Master Protein	Q6NS82	Reticulophagy regulator 2 OS=Mus musculus GN=Retreg2 PE=1 SV=2	0	26	6	40	6	541	57.5	375	40	6	0	1.137	0.93563	63.45	1.137	1.635	0.65
High	Master Protein	P19096	Fatty acid synthase OS=Mus musculus GN=Fasn PE=1 SV=2	0	54	99	887	99	2504	272.3	17169	887	99	0	1.211	0.3757	9.08	1.137	1.211	1.295
High	Master Protein	P29788	Vitronectin OS=Mus musculus GN=Vtn PE=1 SV=2	0	9	3	12	3	478	54.8	197	12	3	0	1.137	0.934322	50.48	1.137	0.75	1.584
High	Master Protein	H3BJN8	RWD domain-containing 4A (Fragment) OS=Mus musculus GN=Rwdd4a PE=1 SV=1	0.003	8	1	2	1	132	14.8	64	2	1	0	1.137	0.976363	17.04	1.137	0.583	1.268
High	Master Protein	E9Q2S0	Protocadherin 7 OS=Mus musculus GN=Pcdh7 PE=1 SV=2	0	8	6	10	6	1247	135.8	56	10	6	0	1.137	0.985588	8.78	1.137	1.204	1.038
High	Master Protein	Q99MN9	Propionyl-CoA carboxylase beta chain, mitochondrial OS=Mus musculus GN=Pccb PE=1 SV=2	0	30	10	108	10	541	58.4	3164	108	10	0	1.137	0.900719	17.46	1.137	1.003	1.697
High	Master Protein	Q99JX4	Eukaryotic translation initiation factor 3 subunit M OS=Mus musculus GN=Eif3m PE=1 SV=1	0	45	13	125	13	374	42.5	2212	125	13	0	1.581	0.0351644	30.83	1.137	1.581	1.91
High	Master Protein	P04104	Keratin, type II cytoskeletal 1 OS=Mus musculus GN=Krt1 PE=1 SV=4	0	6	7	150	3	637	65.6	4511	150	7	1	0.856	0.530732	36.58	1.137	0.623	0.856
High	Master Protein	A2A5Y6	Microtubule-associated protein OS=Mus musculus GN=Mapt PE=1 SV=1	0	55	26	282	12	749	78	3482	282	26	15	1.137	0.697106	11.32	1.137	1.05	1.407
High	Master Protein	P80314	T-complex protein 1 subunit beta OS=Mus musculus GN=Cct2 PE=1 SV=4	0	76	31	596	31	535	57.4	20056	596	31	0	1.028	0.98708	10.08	1.136	1.028	0.958
High	Master Protein	Q5XJY5	Coatomer subunit delta OS=Mus musculus GN=Arcn1 PE=1 SV=2	0	40	21	171	21	511	57.2	2323	171	21	0	1.105	0.916778	3.8	1.136	1.105	1.077
High	Master Protein	A2A5R2	Brefeldin A-inhibited guanine nucleotide-exchange protein 2 OS=Mus musculus GN=Arfgef2 PE=1 SV=1	0	30	41	229	32	1792	202.1	3250	229	41	10	1.13	0.884023	0.84	1.136	1.13	1.039
High	Master Protein	E9Q9C3	Afadin OS=Mus musculus GN=Afdn PE=1 SV=1	0	29	36	144	36	1827	207.2	1370	144	36	0	1.136	0.900835	1.73	1.136	1.149	0.932
High	Master Protein	A2AU61	RNA-binding protein Raly (Fragment) OS=Mus musculus GN=Raly PE=1 SV=1	0	62	15	169	1	211	23.1	2485	169	15	0	1.136	0.958186	4.93	1.136	1.173	0.708
High	Master Protein	Q9WV91	Prostaglandin F2 receptor negative regulator OS=Mus musculus GN=Ptgfrn PE=1 SV=2	0	5	4	11	4	879	98.7	85	11	4	0	1.135	0.976845	41.73	1.135	1.455	0.767
High	Master Protein	P11798	Calcium/calmodulin-dependent protein kinase type II subunit alpha OS=Mus musculus GN=Camk2a PE=1 SV=2	0	44	17	287	9	478	54.1	5127	287	17	0	1.135	0.955672	22.64	1.135	0.962	1.94
High	Master Protein	P61222	ATP-binding cassette sub-family E member 1 OS=Mus musculus GN=Abce1 PE=1 SV=1	0	23	9	33	9	599	67.3	357	33	9	0	1.208	0.736549	8.92	1.135	1.409	1.208
High	Master Protein	P57784	U2 small nuclear ribonucleoprotein A' OS=Mus musculus GN=Snrpa1 PE=1 SV=2	0	52	14	95	14	255	28.3	1381	95	14	0	0.9	0.74355	8.84	1.135	0.849	0.9
High	Master Protein	Q9EQ20	Methylmalonate-semialdehyde dehydrogenase [acylating], mitochondrial OS=Mus musculus GN=Aldh6a1 PE=1 SV=1	0	50	17	88	17	535	57.9	1441	88	17	0	1.135	0.952109	3.7	1.135	1.107	1.694
High	Master Protein	Q61768	Kinesin-1 heavy chain OS=Mus musculus GN=Kif5b PE=1 SV=3	0	56	46	435	33	963	109.5	7778	435	46	14	0.993	0.990285	3.6	1.135	0.993	0.969
High	Master Protein	Q8VHR5	Transcriptional repressor p66-beta OS=Mus musculus GN=Gatad2b PE=1 SV=1	0	43	16	63	16	594	65.4	910	63	16	0	1.1	0.97643	4.71	1.135	1.1	0.921
High	Master Protein	Q9D8Y1	Transmembrane protein 126A OS=Mus musculus GN=Tmem126a PE=1 SV=1	0	26	6	23	6	196	21.5	141	23	6	0	1.135	0.900144	29.68	1.135	1.362	0.723
High	Master Protein	Q8BPB5	EGF-containing fibulin-like extracellular matrix protein 1 OS=Mus musculus GN=Efemp1 PE=1 SV=1	0	35	9	25	9	493	54.9	299	25	9	0	1.537	0.146951	0.61	1.135	1.543	1.537
High	Master Protein	Q99PG2	Opioid growth factor receptor OS=Mus musculus GN=Ogfr PE=1 SV=1	0	25	7	50	7	633	70.6	514	50	7	0	1.134	0.901594	18.12	1.134	1.392	0.996
High	Master Protein	Q8BFY6	Peflin OS=Mus musculus GN=Pef1 PE=1 SV=1	0	17	4	12	4	275	29.2	198	12	4	0	1.04	0.997037	10.47	1.134	0.967	1.04
High	Master Protein	V9GXD9	Synergin gamma OS=Mus musculus GN=Synrg PE=1 SV=1	0	13	10	57	10	1216	129.9	1276	57	10	0	1.134	0.918282	0.49	1.134	1.021	1.138
High	Master Protein	Q9CPV4	Glyoxalase domain-containing protein 4 OS=Mus musculus GN=Glod4 PE=1 SV=1	0	67	19	179	19	298	33.3	5145	179	19	0	1.134	0.874675	9.79	1.134	1.059	1.318
High	Master Protein	E9Q3G8	Nucleoporin 153 OS=Mus musculus GN=Nup153 PE=1 SV=1	0	23	21	63	21	1462	151.9	1258	63	21	0	1.134	0.955218	3.17	1.134	1.158	1.039
High	Master Protein	A2BEE9	Disks large homolog 3 OS=Mus musculus GN=Dlg3 PE=1 SV=1	0	28	16	87	15	835	92.1	892	87	16	0	1.134	0.955139	4.99	1.134	1.096	1.203
High	Master Protein	Q505N6	Ribosomal protein S6 kinase OS=Mus musculus GN=Rps6ka1 PE=1 SV=1	0	16	10	79	5	735	82.8	818	79	10	0	1.179	0.958742	5.65	1.134	1.537	1.179
High	Master Protein	Q9JM14	5'(3')-deoxyribonucleotidase, cytosolic type OS=Mus musculus GN=Nt5c PE=1 SV=1	0	48	6	52	6	200	23.1	637	52	6	0	1.166	0.878207	4.14	1.134	1.166	1.452
High	Master Protein	Q9JIH2	Nuclear pore complex protein Nup50 OS=Mus musculus GN=Nup50 PE=1 SV=3	0	16	4	12	4	466	49.5	262	12	4	0	1.134	0.960995	9.36	1.134	1.205	0.789
High	Master Protein	Q8R3I2	Lysophospholipid acyltransferase 2 OS=Mus musculus GN=Mboat2 PE=1 SV=1	0	10	5	7	5	519	59	138	7	5	0	1.091	0.968252	5.77	1.134	1.091	0.93
High	Master Protein	Q8C1B7	Septin-11 OS=Mus musculus GN=Sept11 PE=1 SV=4	0	57	22	281	6	431	49.7	6087	281	22	16	1.188	0.469782	3.79	1.134	1.218	1.188
High	Master Protein	P62878	E3 ubiquitin-protein ligase RBX1 OS=Mus musculus GN=Rbx1 PE=1 SV=1	0	31	5	83	5	108	12.3	1335	83	5	0	1.133	0.955872	0.44	1.133	1.169	1.13
High	Master Protein	Q61655	ATP-dependent RNA helicase DDX19A OS=Mus musculus GN=Ddx19a PE=1 SV=2	0	39	17	66	3	478	53.9	876	66	17	13	1.023	0.990823	15.7	1.133	1.023	0.915
High	Master Protein	Q8QZZ7	EKC/KEOPS complex subunit Tprkb OS=Mus musculus GN=Tprkb PE=1 SV=1	0	25	3	9	3	175	19.5	133	9	3	0	1.133	0.897607	21.73	1.133	0.967	1.48
High	Master Protein	Q8BNW9	Kelch repeat and BTB domain-containing protein 11 OS=Mus musculus GN=Kbtbd11 PE=1 SV=3	0	46	15	120	15	633	67.9	855	120	15	0	1.133	0.957183	3.96	1.133	1.199	1.103
High	Master Protein	Q61838	Pregnancy zone protein OS=Mus musculus GN=Pzp PE=1 SV=3	0	25	23	91	23	1495	165.7	1010	91	23	0	1.133	0.915651	6.93	1.133	0.981	1.186
High	Master Protein	Q91WM2	Haloacid dehalogenase-like hydrolase domain-containing 5 OS=Mus musculus GN=Hdhd5 PE=1 SV=1	0	9	3	18	3	419	46.3	293	18	3	0	1.006	0.993902	11.69	1.133	1.006	0.927
High	Master Protein	Q922I7	MCG13402, isoform CRA_c OS=Mus musculus GN=Ptbp1 PE=1 SV=1	0	39	13	175	13	555	59.3	3580	175	13	0	1.133	0.894632	4.85	1.133	1.315	1.096
High	Master Protein	Q8BYY4	Tetratricopeptide repeat protein 39B OS=Mus musculus GN=Ttc39b PE=1 SV=1	0	15	5	12	5	617	70.2	279	12	5	0	1.174	0.968151	5.22	1.133	1.174	1.334
High	Master Protein	A2AKD7	Alpha-1-syntrophin OS=Mus musculus GN=Snta1 PE=1 SV=1	0	26	7	18	7	499	53.2	197	18	7	0	0.939	0.976363	22.43	1.133	0.939	0.816
High	Master Protein	A8DUK4	Beta-globin OS=Mus musculus GN=Hbbt1 PE=1 SV=1	0	94	14	918	3	147	15.7	30851	918	14	13	1.133	0.724458	17.01	1.133	1.003	1.908
High	Master Protein	Q9QZM0	Ubiquilin-2 OS=Mus musculus GN=Ubqln2 PE=1 SV=2	0	25	14	176	12	638	67.3	4493	176	14	3	1.133	0.932316	17.85	1.133	0.996	1.458
High	Master Protein	P11499	Heat shock protein HSP 90-beta OS=Mus musculus GN=Hsp90ab1 PE=1 SV=3	0	67	46	1066	30	724	83.2	24316	1066	46	2	1.132	0.726314	0.69	1.132	1.127	1.44
High	Master Protein	G5E850	Cytochrome b-5, isoform CRA_a OS=Mus musculus GN=Cyb5a PE=1 SV=1	0	67	7	64	7	98	11.1	1298	64	7	0	1.132	0.944348	0.34	1.132	1.058	1.135
High	Master Protein	Q3UHC0	Trinucleotide repeat-containing gene 6C protein OS=Mus musculus GN=Tnrc6c PE=1 SV=2	0	6	5	5	5	1690	175.7	91	5	5	0	1.132	0.984017	0.9	1.132	1.139	1.101
High	Master Protein	A0A087WQS2	Basic leucine zipper and W2 domain-containing protein 1 OS=Mus musculus GN=Bzw1 PE=1 SV=1	0	15	8	46	7	451	51.2	506	46	8	0	1.563	0.0442442	2.13	1.132	1.586	1.563
High	Master Protein	O70378	ER membrane protein complex subunit 8 OS=Mus musculus GN=Emc8 PE=1 SV=1	0	40	6	50	6	207	23.3	1387	50	6	0	1.132	0.947175	5.12	1.132	0.902	1.171
High	Master Protein	Q9EQQ9	Protein O-GlcNAcase OS=Mus musculus GN=Mgea5 PE=1 SV=2	0	27	16	118	16	916	103.1	1874	118	16	0	1.132	0.906473	26.34	1.132	0.931	1.553
High	Master Protein	Q9JIF0	Protein arginine N-methyltransferase 1 OS=Mus musculus GN=Prmt1 PE=1 SV=1	0	53	18	218	5	371	42.4	4440	218	18	14	1.118	0.912209	1.88	1.132	0.972	1.118
High	Master Protein	Q6ZQ08	CCR4-NOT transcription complex subunit 1 OS=Mus musculus GN=Cnot1 PE=1 SV=2	0	29	45	194	45	2375	266.6	2693	194	45	0	1.132	0.914154	2.75	1.132	1.174	1.111
High	Master Protein	P30416	Peptidyl-prolyl cis-trans isomerase FKBP4 OS=Mus musculus GN=Fkbp4 PE=1 SV=5	0	64	24	595	24	458	51.5	9279	595	24	0	1.121	0.76902	1.42	1.132	1.039	1.121
High	Master Protein	Q91WV0	Protein Dr1 OS=Mus musculus GN=Dr1 PE=1 SV=1	0	56	5	24	5	176	19.4	642	24	5	0	1.03	0.999996	14.69	1.132	0.563	1.03
High	Master Protein	P27773	Protein disulfide-isomerase A3 OS=Mus musculus GN=Pdia3 PE=1 SV=2	0	79	38	908	37	505	56.6	27731	908	38	1	1.132	0.728543	11.36	1.132	1.045	1.227
High	Master Protein	G5E8D5	Metabotropic glutamate receptor 7 OS=Mus musculus GN=Grm7 PE=1 SV=1	0	13	8	39	8	922	103	317	39	8	0	1.067	0.9873	8.87	1.131	0.938	1.067
High	Master Protein	Q6GQW0	Ankyrin repeat and BTB/POZ domain-containing protein BTBD11 OS=Mus musculus GN=Btbd11 PE=2 SV=2	0	5	3	4	2	1109	121.5	90	4	3	1	1.131	0.911033	2.25	1.131	1.52	1.114
High	Master Protein	Q8BYN5	FSD1-like protein OS=Mus musculus GN=Fsd1l PE=1 SV=2	0	10	4	22	4	507	56.9	502	22	4	0	1.131	0.9873	7.55	1.131	1.188	0.808
High	Master Protein	O35114	Lysosome membrane protein 2 OS=Mus musculus GN=Scarb2 PE=1 SV=3	0	28	10	90	10	478	54	1535	90	10	0	1.464	0.134737	5.89	1.131	1.464	1.522
High	Master Protein	Q9D8L3	Signal sequence receptor, delta OS=Mus musculus GN=Ssr4 PE=1 SV=1	0	38	7	66	7	173	19	928	66	7	0	1.036	0.993902	13.52	1.131	0.916	1.036
High	Master Protein	E9QN31	Probable 28S rRNA (cytosine-C(5))-methyltransferase OS=Mus musculus GN=Nop2 PE=1 SV=1	0	20	9	21	9	794	86.9	420	21	9	0	1.005	0.988622	18.53	1.131	1.005	0.799
High	Master Protein	Q9Z275	Retinaldehyde-binding protein 1 OS=Mus musculus GN=Rlbp1 PE=1 SV=3	0	75	21	866	21	317	36.4	23648	866	21	0	1.13	0.731483	25.47	1.13	0.936	1.449
High	Master Protein	Q60867	Neurogenic differentiation factor 1 OS=Mus musculus GN=Neurod1 PE=1 SV=2	0	5	1	20	1	357	40	334	20	1	0	1.13	0.989059	17.79	1.13	0.995	1.312
High	Master Protein	Q9D1P0	39S ribosomal protein L13, mitochondrial OS=Mus musculus GN=Mrpl13 PE=1 SV=1	0	44	5	14	5	178	20.7	117	14	5	0	0.983	0.984558	10.03	1.13	0.983	0.92
High	Master Protein	Q8BTG7	Protein NDRG4 OS=Mus musculus GN=Ndrg4 PE=1 SV=1	0	30	7	65	4	352	38.5	1046	65	7	3	1.13	0.949158	5.09	1.13	0.916	1.169
High	Master Protein	Q64520	Guanylate kinase OS=Mus musculus GN=Guk1 PE=1 SV=2	0	76	14	339	1	198	21.9	7839	339	14	0	1.13	0.915651	28.76	1.13	0.907	1.349
High	Master Protein	P08228	Superoxide dismutase [Cu-Zn] OS=Mus musculus GN=Sod1 PE=1 SV=2	0	83	10	350	10	154	15.9	9191	350	10	0	1.13	0.734885	19	1.13	0.985	1.618
High	Master Protein	Q69ZR9	Protein TASOR OS=Mus musculus GN=Fam208a PE=1 SV=2	0	7	7	19	7	1610	181.3	231	19	7	0	1.13	0.956465	15.34	1.13	1.259	1.013
High	Master Protein	Q8BZW8	NHL repeat-containing protein 2 OS=Mus musculus GN=Nhlrc2 PE=1 SV=1	0	17	10	43	10	725	78.4	457	43	10	0	1.014	0.996224	12.52	1.13	0.929	1.014
High	Master Protein	Q61686	Chromobox protein homolog 5 OS=Mus musculus GN=Cbx5 PE=1 SV=1	0	43	8	174	7	191	22.2	3876	174	8	0	1.07	0.9873	4.96	1.13	1.07	1.034
High	Master Protein	O54941	SWI/SNF-related matrix-associated actin-dependent regulator of chromatin subfamily E member 1 OS=Mus musculus GN=Smarce1 PE=1 SV=1	0	39	11	98	11	411	46.6	1783	98	11	0	1.13	0.955139	11.12	1.13	1.214	0.946
High	Master Protein	Q3TTY5	Keratin, type II cytoskeletal 2 epidermal OS=Mus musculus GN=Krt2 PE=1 SV=1	0	10	11	116	7	707	70.9	2018	116	11	0	1.012	0.999849	17.12	1.129	1.012	0.848
High	Master Protein	Q8CI94	Glycogen phosphorylase, brain form OS=Mus musculus GN=Pygb PE=1 SV=3	0	61	53	1113	39	843	96.7	20380	1113	53	0	1.353	0.0517411	11.64	1.129	1.353	1.459
High	Master Protein	P28740	Kinesin-like protein KIF2A OS=Mus musculus GN=Kif2a PE=1 SV=2	0	26	16	96	16	705	79.7	1877	96	16	0	1.025	0.989746	15.12	1.129	1.025	0.792
High	Master Protein	Q9D0F3	Protein ERGIC-53 OS=Mus musculus GN=Lman1 PE=1 SV=1	0	50	24	303	24	517	57.8	4005	303	24	0	1.129	0.717033	5.29	1.129	1.089	1.248
High	Master Protein	P52479	Ubiquitin carboxyl-terminal hydrolase 10 OS=Mus musculus GN=Usp10 PE=1 SV=3	0	36	16	44	16	792	87	508	44	16	0	1.129	0.917603	6.84	1.129	1.181	1.003
High	Master Protein	Q8C9B9	Death-inducer obliterator 1 OS=Mus musculus GN=Dido1 PE=1 SV=4	0	28	38	135	38	2256	247	1880	135	38	0	1.129	0.918724	3.03	1.129	1.152	0.83
High	Master Protein	Q8BX80	Cytosolic endo-beta-N-acetylglucosaminidase OS=Mus musculus GN=Engase PE=1 SV=1	0	25	13	45	13	734	82.9	392	45	13	0	0.981	0.97643	8.94	1.129	0.981	0.925
High	Master Protein	Q921H9	Cytochrome c oxidase assembly factor 7 OS=Mus musculus GN=Coa7 PE=1 SV=1	0	35	6	50	6	231	25.6	514	50	6	0	1.122	0.932519	0.88	1.129	0.79	1.122
High	Master Protein	Q3U2G2	Heat shock 70 kDa protein 4 OS=Mus musculus GN=Hspa4 PE=1 SV=1	0	67	46	757	43	842	94.1	13343	757	46	1	1.049	0.969724	11.14	1.128	0.946	1.049
High	Master Protein	B1AZF3	Serine/threonine-protein kinase LMTK1 OS=Mus musculus GN=Aatk PE=1 SV=1	0	4	4	11	4	1374	145.3	161	11	4	0	1.128	0.95823	38.26	1.128	1.419	0.829
High	Master Protein	Q9CPR4	60S ribosomal protein L17 OS=Mus musculus GN=Rpl17 PE=1 SV=3	0	52	11	269	11	184	21.4	6961	269	11	0	1.081	0.920816	4.91	1.128	1.045	1.081
High	Master Protein	B2RUJ5	Amyloid beta A4 precursor protein-binding family A member 1 OS=Mus musculus GN=Apba1 PE=1 SV=2	0	14	7	17	5	842	92.9	309	17	7	1	1.128	0.956319	9.4	1.128	1.442	1.056
High	Master Protein	Q9D7N3	28S ribosomal protein S9, mitochondrial OS=Mus musculus GN=Mrps9 PE=1 SV=3	0	28	7	33	7	390	44.9	384	33	7	0	1.128	0.965018	8.9	1.128	1.06	1.47
High	Master Protein	Q9Z2C9	Myotubularin-related protein 7 OS=Mus musculus GN=Mtmr7 PE=1 SV=2	0	29	13	41	12	660	75.6	393	41	13	1	1.092	0.976363	4.84	1.128	0.98	1.092
High	Master Protein	E9Q6H8	Pleckstrin homology domain-containing, family A member 5 OS=Mus musculus GN=Plekha5 PE=1 SV=1	0	17	15	57	15	1269	144.3	540	57	15	0	0.924	0.891949	6.39	1.128	0.885	0.924
High	Master Protein	Z4YKC4	Eukaryotic translation initiation factor 4 gamma 3 OS=Mus musculus GN=Eif4g3 PE=1 SV=1	0	32	37	226	35	1567	173.4	2841	226	37	2	1.073	0.989104	7.58	1.127	0.996	1.073
High	Master Protein	A2AUK5	Band 4.1-like protein 1 OS=Mus musculus GN=Epb41l1 PE=1 SV=1	0	49	30	378	1	879	98.3	7186	378	30	6	1.127	0.917208	25.21	1.127	1.319	0.881
High	Master Protein	Q8BMK4	Cytoskeleton-associated protein 4 OS=Mus musculus GN=Ckap4 PE=1 SV=2	0	55	28	325	28	575	63.7	7619	325	28	0	1.127	0.746115	1.92	1.127	1.197	1.113
High	Master Protein	E9PZ26	Bromodomain-containing 1 OS=Mus musculus GN=Brd1 PE=1 SV=1	0	5	5	11	5	1189	133.3	76	11	5	0	1.166	0.922003	4.89	1.127	1.166	1.258
High	Master Protein	Q9D1D4	Transmembrane emp24 domain-containing protein 10 OS=Mus musculus GN=Tmed10 PE=1 SV=1	0	42	9	255	9	219	24.9	7124	255	9	0	1.053	0.984017	4.06	1.127	1.025	1.053
High	Master Protein	A0A0G2JG13	Kelch-like 18 OS=Mus musculus GN=Klhl18 PE=1 SV=1	0	5	2	9	2	509	56.4	94	9	2	0	1.127	0.984558	0.26	1.127	1.129	0.936
High	Master Protein	O55047	Serine/threonine-protein kinase tousled-like 2 OS=Mus musculus GN=Tlk2 PE=1 SV=2	0	11	6	36	5	718	82.2	583	36	6	1	1.125	0.95823	0.31	1.127	1.125	0.878
High	Master Protein	Q9D0S9	Histidine triad nucleotide-binding protein 2, mitochondrial OS=Mus musculus GN=Hint2 PE=1 SV=1	0	55	6	71	6	163	17.3	2496	71	6	0	1.218	0.731761	11.03	1.127	1.218	1.395
High	Master Protein	Q8VD37	SH3-containing GRB2-like protein 3-interacting protein 1 OS=Mus musculus GN=Sgip1 PE=1 SV=1	0	39	20	129	20	806	86	2269	129	20	0	1.127	0.926475	9.77	1.127	1.053	1.233
High	Master Protein	Q8C3P7	N6-adenosine-methyltransferase subunit METTL3 OS=Mus musculus GN=Mettl3 PE=1 SV=2	0	41	13	100	13	580	64.6	1060	100	13	0	1.092	0.976363	4.7	1.127	1.092	0.985
High	Master Protein	Q9CQX8	28S ribosomal protein S36, mitochondrial OS=Mus musculus GN=Mrps36 PE=1 SV=1	0	71	4	38	1	102	11.1	964	38	4	0	1.091	0.984558	3.68	1.127	1.091	1.064
High	Master Protein	A0A0R4IZY0	Thimet oligopeptidase OS=Mus musculus GN=Thop1 PE=1 SV=1	0	54	31	222	31	687	78	3363	222	31	0	1.046	0.996271	5.62	1.127	1.006	1.046
High	Master Protein	Q9DBY8	Nuclear valosin-containing protein-like OS=Mus musculus GN=Nvl PE=1 SV=1	0	5	3	13	3	855	94.4	476	13	3	0	0.963	0.988026	21.46	1.126	0.963	0.745
High	Master Protein	P62843	40S ribosomal protein S15 OS=Mus musculus GN=Rps15 PE=1 SV=2	0	43	4	223	4	145	17	3057	223	4	0	1.126	0.883165	3.22	1.126	1.102	1.893
High	Master Protein	Q99K70	Ras-related GTP-binding protein C OS=Mus musculus GN=Rragc PE=1 SV=1	0	33	10	79	10	398	44.1	1187	79	10	0	0.961	0.963193	11.48	1.126	0.892	0.961
High	Master Protein	Q8BMJ3	Eukaryotic translation initiation factor 1A, X-chromosomal OS=Mus musculus GN=Eif1ax PE=2 SV=3	0	35	5	43	5	144	16.5	981	43	5	0	1.115	0.916306	1.41	1.126	1.115	0.699
High	Master Protein	Q6NZL0	Protein SOGA3 OS=Mus musculus GN=Soga3 PE=1 SV=2	0	9	8	68	7	945	103.4	941	68	8	0	1.126	0.918282	2.1	1.126	1.142	1.04
High	Master Protein	P11404	Fatty acid-binding protein, heart OS=Mus musculus GN=Fabp3 PE=1 SV=5	0	47	6	42	6	133	14.8	297	42	6	0	1.126	0.930091	2.73	1.126	1.105	1.882
High	Master Protein	Q91W39	Nuclear receptor coactivator 5 OS=Mus musculus GN=Ncoa5 PE=1 SV=1	0	50	21	180	21	579	65.3	2454	180	21	0	1.126	0.923745	7.38	1.126	1.182	0.89
High	Master Protein	Q8C052	Microtubule-associated protein 1S OS=Mus musculus GN=Map1s PE=1 SV=2	0	35	21	145	21	973	102.9	1543	145	21	0	1.117	0.975388	1.12	1.126	1.117	1.001
High	Master Protein	P97367	Homeobox protein Meis2 OS=Mus musculus GN=Meis2 PE=1 SV=2	0	12	4	28	1	477	51.7	157	28	4	3	1.112	0.976363	1.78	1.126	0.957	1.112
High	Master Protein	Q9D666	SUN domain-containing protein 1 OS=Mus musculus GN=Sun1 PE=1 SV=2	0	16	9	58	9	913	101.9	1150	58	9	0	1	0.984735	10.23	1.126	1	0.935
High	Master Protein	Q9WTT4	V-type proton ATPase subunit G 2 OS=Mus musculus GN=Atp6v1g2 PE=1 SV=1	0	77	10	251	10	118	13.6	3706	251	10	0	1.125	0.856828	0.07	1.125	1.126	0.956
High	Master Protein	Q80XI4	Phosphatidylinositol 5-phosphate 4-kinase type-2 beta OS=Mus musculus GN=Pip4k2b PE=1 SV=1	0	46	16	110	13	416	47.3	1487	110	16	3	1.125	0.927215	17.74	1.125	1.26	0.92
High	Master Protein	P31230	Aminoacyl tRNA synthase complex-interacting multifunctional protein 1 OS=Mus musculus GN=Aimp1 PE=1 SV=2	0	62	13	118	13	310	34	2915	118	13	0	1.3	0.347465	11.89	1.125	1.3	1.404
High	Master Protein	F2Z4B3	Cyclin-dependent kinase 2-associated protein 1 OS=Mus musculus GN=Cdk2ap1 PE=1 SV=1	0	11	1	17	1	87	9.6	114	17	1	0	1.089	0.975388	4.89	1.125	1.089	0.781
High	Master Protein	Q9ER00	Syntaxin-12 OS=Mus musculus GN=Stx12 PE=1 SV=1	0	58	10	114	10	274	31.2	2516	114	10	0	1.095	0.976363	4.11	1.125	1.018	1.095
High	Master Protein	Q9DBC3	Cap-specific mRNA (nucleoside-2'-O-)-methyltransferase 1 OS=Mus musculus GN=Cmtr1 PE=1 SV=1	0	37	22	103	22	837	95.6	1306	103	22	0	1.125	0.960209	12.27	1.125	1.218	1.005
High	Master Protein	O35551	Rab GTPase-binding effector protein 1 OS=Mus musculus GN=Rabep1 PE=1 SV=2	0	25	18	115	18	862	99.5	2083	115	18	0	1.065	0.98708	8.24	1.125	1.006	1.065
High	Master Protein	Q3ZK22	Vezatin OS=Mus musculus GN=Vezt PE=1 SV=2	0	18	9	23	9	780	87.9	145	23	9	0	1.125	0.956465	4.8	1.125	0.865	1.161
High	Master Protein	Q8BTE5	Protein CEBPZOS OS=Mus musculus GN=Cebpzos PE=3 SV=2	0	38	3	35	3	80	9.3	197	35	3	0	0.891	0.749569	13.74	1.125	0.816	0.891
High	Master Protein	Q02248	Catenin beta-1 OS=Mus musculus GN=Ctnnb1 PE=1 SV=1	0	54	30	400	26	781	85.4	8600	400	30	4	1.103	0.837614	1.5	1.125	1.103	1.092
High	Master Protein	P80313	T-complex protein 1 subunit eta OS=Mus musculus GN=Cct7 PE=1 SV=1	0	61	24	363	24	544	59.6	10013	363	24	0	1.001	0.999996	0.66	1.125	1.001	0.997
High	Master Protein	Q8R180	ERO1-like protein alpha OS=Mus musculus GN=Ero1a PE=1 SV=2	0	37	11	50	11	464	54.1	1076	50	11	0	1.123	0.916864	0.12	1.124	0.93	1.123
High	Master Protein	A3KG93	Lysine-specific histone demethylase 1A OS=Mus musculus GN=Kdm1a PE=1 SV=1	0	34	23	93	23	873	94.6	1590	93	23	0	1.059	0.999996	9.17	1.124	1.059	0.955
High	Master Protein	P57722	Poly(rC)-binding protein 3 OS=Mus musculus GN=Pcbp3 PE=1 SV=3	0	75	18	363	11	371	39.3	12005	363	18	0	1.004	0.999996	0.72	1.124	1.004	0.999
High	Master Protein	P49443	Protein phosphatase 1A OS=Mus musculus GN=Ppm1a PE=1 SV=1	0	64	17	150	14	382	42.4	1952	150	17	3	1.124	0.749215	22.42	1.124	0.95	1.294
High	Master Protein	Q8BGN8	Synaptoporin OS=Mus musculus GN=Synpr PE=1 SV=1	0	37	6	134	6	265	29.2	3820	134	6	0	1.15	0.615737	3.37	1.124	1.15	1.464
High	Master Protein	P45376	Aldose reductase OS=Mus musculus GN=Akr1b1 PE=1 SV=3	0	58	15	187	15	316	35.7	2240	187	15	0	1.176	0.665865	6.57	1.124	1.176	1.622
High	Master Protein	Q9QYE6	Golgin subfamily A member 5 OS=Mus musculus GN=Golga5 PE=1 SV=2	0	22	10	27	10	729	82.3	516	27	10	0	0.984	0.976653	15.42	1.124	0.984	0.892
High	Master Protein	Q99KI3	ER membrane protein complex subunit 3 OS=Mus musculus GN=Emc3 PE=1 SV=3	0	8	2	8	2	261	30	123	8	2	0	1.124	0.964925	8.53	1.124	1.188	0.992
High	Master Protein	E0CYS8	Forkhead box protein J3 (Fragment) OS=Mus musculus GN=Foxj3 PE=1 SV=1	0	13	1	5	1	104	11.4	81	5	1	0	1.123	0.993902	11.2	1.123	0.896	1.208
High	Master Protein	Q62086	Serum paraoxonase/arylesterase 2 OS=Mus musculus GN=Pon2 PE=1 SV=2	0	45	10	169	10	354	39.6	3811	169	10	0	1.146	0.89925	2.91	1.123	1.188	1.146
High	Master Protein	Q3U4G3	Xyloside xylosyltransferase 1 OS=Mus musculus GN=Xxylt1 PE=1 SV=2	0	20	6	24	6	392	43.8	274	24	6	0	1.123	0.954579	22.46	1.123	1.293	0.856
High	Master Protein	Q8VC57	BTB/POZ domain-containing protein KCTD5 OS=Mus musculus GN=Kctd5 PE=1 SV=1	0	7	1	8	1	234	26.1	102	8	1	0	1	0.993902	7.47	1.123	1	0.95
High	Master Protein	P12382	ATP-dependent 6-phosphofructokinase, liver type OS=Mus musculus GN=Pfkl PE=1 SV=4	0	57	40	1234	33	780	85.3	28812	1234	40	3	1.045	0.976363	6.69	1.123	0.998	1.045
High	Master Protein	G3X8Y3	N-alpha-acetyltransferase 15, NatA auxiliary subunit OS=Mus musculus GN=Naa15 PE=1 SV=1	0	21	15	56	15	865	101	681	56	15	0	1.123	0.921818	17.14	1.123	1.32	0.993
High	Master Protein	Q8BZM1	Glomulin OS=Mus musculus GN=Glmn PE=1 SV=1	0	27	14	90	14	596	67.7	2069	90	14	0	0.943	0.914774	6.25	1.123	0.905	0.943
High	Master Protein	Q6P1F6	Serine/threonine-protein phosphatase 2A 55 kDa regulatory subunit B alpha isoform OS=Mus musculus GN=Ppp2r2a PE=1 SV=1	0	55	17	128	11	447	51.7	2468	128	17	6	1.123	0.923745	0.67	1.123	1.08	1.128
High	Master Protein	P81117	Nucleobindin-2 OS=Mus musculus GN=Nucb2 PE=1 SV=2	0	40	13	107	13	420	50.3	1852	107	13	0	1.117	0.966747	0.81	1.123	0.929	1.117
High	Master Protein	Q8VD65	Phosphoinositide 3-kinase regulatory subunit 4 OS=Mus musculus GN=Pik3r4 PE=1 SV=3	0	13	13	52	13	1358	152.5	687	52	13	0	1.079	0.984017	5.97	1.122	1.079	0.956
High	Master Protein	E9PYH2	Cytosolic acyl coenzyme A thioester hydrolase OS=Mus musculus GN=Acot7 PE=1 SV=1	0	54	12	153	12	384	42.8	2269	153	12	0	1.122	0.920816	14.82	1.122	1.01	1.432
High	Master Protein	Q80WV7	Serine/arginine repetitive matrix protein 3 OS=Mus musculus GN=Srrm3 PE=2 SV=1	0	2	1	10	1	648	71.1	57	10	1	0	1.031	0.999996	13.17	1.122	1.031	0.631
High	Master Protein	Q9WTP7	GTP:AMP phosphotransferase AK3, mitochondrial OS=Mus musculus GN=Ak3 PE=1 SV=3	0	55	9	40	9	227	25.4	580	40	9	0	1.144	0.920034	2.8	1.122	1.144	1.882
High	Master Protein	Q3TZG8	Nucleolar protein 4-like OS=Mus musculus GN=Nol4l PE=1 SV=1	0	18	4	24	3	435	47.2	163	24	4	1	0.848	0.822256	28.89	1.122	0.71	0.848
High	Master Protein	D3Z0M9	DEAD (Asp-Glu-Ala-Asp) box polypeptide 23 OS=Mus musculus GN=Ddx23 PE=1 SV=1	0	22	15	103	15	819	95.4	703	103	15	0	1.122	0.966866	49.15	1.122	1.786	0.75
High	Master Protein	Q60709	Amyloid-like protein 2 OS=Mus musculus GN=Aplp2 PE=1 SV=1	0	18	10	65	1	751	85.2	836	65	10	7	1.121	0.920915	2.08	1.121	0.839	1.137
High	Master Protein	Q923T9	Calcium/calmodulin-dependent protein kinase type II subunit gamma OS=Mus musculus GN=Camk2g PE=1 SV=1	0	44	19	331	9	529	59.6	6308	331	19	0	1.121	0.947187	15.38	1.121	0.91	1.238
High	Master Protein	P97470	Serine/threonine-protein phosphatase 4 catalytic subunit OS=Mus musculus GN=Ppp4c PE=1 SV=2	0	42	9	71	7	307	35.1	541	71	9	0	1.121	0.933429	0.28	1.121	1.229	1.119
High	Master Protein	Q99K48	Non-POU domain-containing octamer-binding protein OS=Mus musculus GN=Nono PE=1 SV=3	0	60	28	901	27	473	54.5	8890	901	28	0	1.121	0.76902	22.88	1.121	1.294	0.907
High	Master Protein	Q9WV18	Gamma-aminobutyric acid type B receptor subunit 1 OS=Mus musculus GN=Gabbr1 PE=1 SV=1	0	14	11	72	11	960	108.1	950	72	11	0	0.991	0.976363	17.21	1.121	0.704	0.991
High	Master Protein	Q03958	Prefoldin subunit 6 OS=Mus musculus GN=Pfdn6 PE=1 SV=1	0	54	7	46	7	127	14.4	562	46	7	0	1.112	0.935706	1.14	1.121	0.999	1.112
High	Master Protein	Q6A068	Cell division cycle 5-like protein OS=Mus musculus GN=Cdc5l PE=1 SV=2	0	50	24	190	24	802	92.1	3352	190	24	0	1.073	0.921387	6.63	1.121	1.073	0.978
High	Master Protein	Q6PGB8	Probable global transcription activator SNF2L1 OS=Mus musculus GN=Smarca1 PE=1 SV=1	0	15	13	92	4	1046	121.6	837	92	13	0	1.04	0.996172	11.46	1.121	1.04	0.905
High	Master Protein	A2A9Z1	Dystrophin OS=Mus musculus GN=Dmd PE=1 SV=1	0	24	11	85	1	604	68.9	1398	85	11	0	0.958	0.976653	20.02	1.12	0.844	0.958
High	Master Protein	Q9ESN6	Tripartite motif-containing protein 2 OS=Mus musculus GN=Trim2 PE=1 SV=1	0	43	22	236	20	744	81.4	3470	236	22	2	1.12	0.897769	2.17	1.12	1.036	1.136
High	Master Protein	E9QKB2	Intracellular hyaluronan-binding protein 4 OS=Mus musculus GN=Habp4 PE=1 SV=1	0	41	11	111	11	412	45.9	1080	111	11	0	1.04	0.994535	10.38	1.12	0.967	1.04
High	Master Protein	P60335	Poly(rC)-binding protein 1 OS=Mus musculus GN=Pcbp1 PE=1 SV=1	0	87	19	597	14	356	37.5	13610	597	19	0	1.117	0.78563	0.32	1.119	1.071	1.117
High	Master Protein	Q8BG79	CWF19-like protein 2 OS=Mus musculus GN=Cwf19l2 PE=1 SV=1	0	8	6	20	6	887	103.1	203	20	6	0	1.119	0.976363	8.85	1.119	1.052	1.968
High	Master Protein	P27641	X-ray repair cross-complementing protein 5 OS=Mus musculus GN=Xrcc5 PE=1 SV=4	0	24	11	43	11	732	83	1236	43	11	0	1.119	0.930899	16.87	1.119	0.992	1.552
High	Master Protein	Q9DBH5	Vesicular integral-membrane protein VIP36 OS=Mus musculus GN=Lman2 PE=1 SV=2	0	37	12	117	12	358	40.4	2265	117	12	0	1.119	0.960995	4.62	1.119	1.154	1.071
High	Master Protein	Q9EQS3	C-Myc-binding protein OS=Mus musculus GN=Mycbp PE=1 SV=5	0	63	5	38	5	103	12	570	38	5	0	0.89	0.735904	30.32	1.119	0.725	0.89
High	Master Protein	O35099	Mitogen-activated protein kinase kinase kinase 5 OS=Mus musculus GN=Map3k5 PE=1 SV=3	0	9	8	25	8	1380	154.4	180	25	8	0	1.241	0.644259	14.62	1.119	1.241	1.401
High	Master Protein	Q99NE5	Regulating synaptic membrane exocytosis protein 1 OS=Mus musculus GN=Rims1 PE=1 SV=2	0	10	10	20	6	1463	163.1	239	20	10	3	0.977	0.985275	18.77	1.119	0.977	0.857
High	Master Protein	P70290	55 kDa erythrocyte membrane protein OS=Mus musculus GN=Mpp1 PE=1 SV=1	0	50	15	78	15	466	52.2	1842	78	15	0	1.119	0.960995	0.06	1.119	1.263	1.118
High	Master Protein	O35685	Nuclear migration protein nudC OS=Mus musculus GN=Nudc PE=1 SV=1	0	39	11	82	11	332	38.3	1355	82	11	0	1.119	0.94164	11.59	1.119	1.031	1.33
High	Master Protein	Q8BKT7	THO complex subunit 5 homolog OS=Mus musculus GN=Thoc5 PE=1 SV=2	0	41	18	188	18	683	78.6	3566	188	18	0	1.071	0.993902	6.65	1.119	1.071	0.918
High	Master Protein	Q91YD9	Neural Wiskott-Aldrich syndrome protein OS=Mus musculus GN=Wasl PE=1 SV=1	0	26	7	42	7	501	54.2	733	42	7	0	1.071	0.984735	6.58	1.119	0.785	1.071
High	Master Protein	Q60668	Heterogeneous nuclear ribonucleoprotein D0 OS=Mus musculus GN=Hnrnpd PE=1 SV=2	0	32	14	572	12	355	38.3	13943	572	14	3	1.118	0.780771	8.78	1.118	1.185	0.829
High	Master Protein	Q9JHJ0	Tropomodulin-3 OS=Mus musculus GN=Tmod3 PE=1 SV=1	0	16	5	37	4	352	39.5	516	37	5	0	1.118	0.964925	9.5	1.118	1.19	0.874
High	Master Protein	Q9Z2U1	Proteasome subunit alpha type-5 OS=Mus musculus GN=Psma5 PE=1 SV=1	0	50	9	157	9	241	26.4	5236	157	9	0	1.118	0.809886	2.3	1.118	1.019	1.135
High	Master Protein	Q8BW41	Protein O-linked-mannose beta-1,4-N-acetylglucosaminyltransferase 2 OS=Mus musculus GN=Pomgnt2 PE=1 SV=1	0	20	6	39	6	605	69.3	373	39	6	0	0.85	0.646612	27.59	1.118	0.717	0.85
High	Master Protein	Q6P2L7	Protein CASC4 OS=Mus musculus GN=Casc4 PE=1 SV=1	0	14	4	25	4	435	49.4	191	25	4	0	1.016	0.999996	5.13	1.118	1.016	0.981
High	Master Protein	Q63943	Myocyte-specific enhancer factor 2D OS=Mus musculus GN=Mef2d PE=1 SV=2	0	26	6	64	5	514	55	1323	64	6	1	1.039	0.994998	11.19	1.118	0.937	1.039
High	Master Protein	Q3THK7	GMP synthase [glutamine-hydrolyzing] OS=Mus musculus GN=Gmps PE=1 SV=2	0	63	31	250	31	693	76.7	3851	250	31	0	1.118	0.916864	5.07	1.118	1.047	1.156
High	Master Protein	Q8BMP6	Golgi resident protein GCP60 OS=Mus musculus GN=Acbd3 PE=1 SV=3	0	42	16	108	16	525	60.1	2454	108	16	0	1.155	0.897212	4.78	1.118	1.204	1.155
High	Master Protein	Q921K2	Poly [ADP-ribose] polymerase OS=Mus musculus GN=Parp1 PE=1 SV=1	0	30	23	101	23	1014	112.7	1495	101	23	0	1.025	0.996172	4.88	1.117	1.025	0.991
High	Master Protein	O89079	Coatomer subunit epsilon OS=Mus musculus GN=Cope PE=1 SV=3	0	56	12	105	12	308	34.5	1032	105	12	0	1.142	0.895524	3.22	1.117	1.2	1.142
High	Master Protein	Q9EQF6	Dihydropyrimidinase-related protein 5 OS=Mus musculus GN=Dpysl5 PE=1 SV=1	0	74	28	440	28	564	61.5	10056	440	28	0	1.117	0.788712	15.18	1.117	1.002	1.48
High	Master Protein	A0A0R4J023	Methylglutaconyl-CoA hydratase, mitochondrial OS=Mus musculus GN=Auh PE=1 SV=1	0	36	12	104	12	314	33.3	1852	104	12	0	1.116	0.833931	3.51	1.116	1.259	1.09
High	Master Protein	Q9JKR6	Hypoxia up-regulated protein 1 OS=Mus musculus GN=Hyou1 PE=1 SV=1	0	36	25	272	25	999	111.1	4845	272	25	0	1.116	0.915056	17.69	1.116	0.983	1.345
High	Master Protein	Q8VEJ9	Vacuolar protein sorting-associated protein 4A OS=Mus musculus GN=Vps4a PE=1 SV=1	0	26	10	85	6	437	48.9	1382	85	10	4	1.116	0.955139	21.16	1.116	1.439	0.957
High	Master Protein	Q8K1A5	Transmembrane protein 41B OS=Mus musculus GN=Tmem41b PE=1 SV=1	0	14	3	24	3	291	32.4	264	24	3	0	1.101	0.96623	1.96	1.116	0.965	1.101
High	Master Protein	Q9QYA2	Mitochondrial import receptor subunit TOM40 homolog OS=Mus musculus GN=Tomm40 PE=1 SV=3	0	58	12	146	12	361	37.9	2349	146	12	0	0.992	0.970128	11.85	1.116	0.919	0.992
High	Master Protein	Q91VA6	Polymerase delta-interacting protein 2 OS=Mus musculus GN=Poldip2 PE=1 SV=1	0	36	9	62	9	368	41.8	916	62	9	0	1.312	0.405187	9.31	1.116	1.312	1.394
High	Master Protein	Q62433	Protein NDRG1 OS=Mus musculus GN=Ndrg1 PE=1 SV=1	0	64	17	553	17	394	43	12900	553	17	0	1.116	0.790568	4.62	1.116	1.081	1.202
High	Master Protein	Q3U0M1	Trafficking protein particle complex subunit 9 OS=Mus musculus GN=Trappc9 PE=1 SV=2	0	16	13	39	13	1148	128.2	248	39	13	0	1.038	0.999996	11.02	1.116	0.9	1.038
High	Master Protein	O88307	Sortilin-related receptor OS=Mus musculus GN=Sorl1 PE=1 SV=3	0	10	15	36	15	2215	246.9	357	36	15	0	1.099	0.963233	0.42	1.116	1.099	1.096
High	Master Protein	Q7TSV4	Phosphoglucomutase-2 OS=Mus musculus GN=Pgm2 PE=1 SV=1	0	21	8	27	8	620	68.7	606	27	8	0	1.115	0.936516	17.63	1.115	0.983	1.721
High	Master Protein	Q6NZF1	Zinc finger CCCH domain-containing protein 11A OS=Mus musculus GN=Zc3h11a PE=1 SV=1	0	30	18	79	18	792	86.4	1008	79	18	0	0.956	0.894632	1.55	1.115	0.956	0.946
High	Master Protein	Q8BH15	CCR4-NOT transcription complex subunit 10 OS=Mus musculus GN=Cnot10 PE=1 SV=1	0	17	10	25	10	744	81.8	542	25	10	0	0.974	0.976401	3.89	1.115	0.974	0.949
High	Master Protein	Q8CIE6	Coatomer subunit alpha OS=Mus musculus GN=Copa PE=1 SV=2	0	55	49	532	49	1224	138.3	9614	532	49	0	1.115	0.804682	5.5	1.115	1.202	1.074
High	Master Protein	P32037	Solute carrier family 2, facilitated glucose transporter member 3 OS=Mus musculus GN=Slc2a3 PE=1 SV=1	0	13	8	112	8	493	53.4	1737	112	8	0	1.115	0.914841	19.12	1.115	0.971	1.502
High	Master Protein	Q542V3	Serine/arginine-rich-splicing factor 4 OS=Mus musculus GN=Srsf4 PE=1 SV=1	0	24	15	195	12	491	56.2	4398	195	15	3	1.115	0.793745	4.82	1.115	1.151	0.955
High	Master Protein	Q9CQ86	Migration and invasion enhancer 1 OS=Mus musculus GN=Mien1 PE=1 SV=1	0	17	2	16	2	115	12.3	167	16	2	0	1.115	0.941957	6.04	1.115	1.016	1.16
High	Master Protein	Q9DCF9	Translocon-associated protein subunit gamma OS=Mus musculus GN=Ssr3 PE=1 SV=1	0	8	1	6	1	185	21.1	379	6	1	0	1.022	0.99717	3.75	1.115	0.996	1.022
High	Master Protein	Q60864	Stress-induced-phosphoprotein 1 OS=Mus musculus GN=Stip1 PE=1 SV=1	0	59	32	501	32	543	62.5	9746	501	32	0	0.997	0.99961	15.58	1.114	0.889	0.997
High	Master Protein	Q3TXS7	26S proteasome non-ATPase regulatory subunit 1 OS=Mus musculus GN=Psmd1 PE=1 SV=1	0	41	29	220	29	953	105.7	4739	220	29	0	1.069	0.976363	0.21	1.114	1.069	1.067
High	Master Protein	Q8K2C7	Protein OS-9 OS=Mus musculus GN=Os9 PE=1 SV=2	0	12	6	18	6	672	76.1	156	18	6	0	1.061	0.993902	7.41	1.114	0.795	1.061
High	Master Protein	Q8JZS0	Protein lin-7 homolog A OS=Mus musculus GN=Lin7a PE=1 SV=2	0	62	12	303	5	233	26	11206	303	12	1	1.113	0.873565	6.6	1.113	1.163	1.039
High	Master Protein	A0A1W2P6X9	Bromodomain adjacent to zinc finger domain protein 2A OS=Mus musculus GN=Baz2a PE=1 SV=1	0	4	4	14	4	1890	209.6	90	14	4	0	1.113	0.984017	4.28	1.113	1.22	1.081
High	Master Protein	Q9WTX2	Interferon-inducible double-stranded RNA-dependent protein kinase activator A OS=Mus musculus GN=Prkra PE=1 SV=1	0	37	8	63	8	313	34.3	1131	63	8	0	1.132	0.955139	2.43	1.113	1.132	1.206
High	Master Protein	Q9R0P9	Ubiquitin carboxyl-terminal hydrolase isozyme L1 OS=Mus musculus GN=Uchl1 PE=1 SV=1	0	62	11	237	11	223	24.8	5350	237	11	0	1.113	0.801617	11.14	1.113	1.03	1.372
High	Master Protein	A2A9P6	Cyclin-dependent kinase 11B OS=Mus musculus GN=Cdk11b PE=1 SV=1	0	11	6	19	6	750	87.3	250	19	6	0	1.113	0.938724	6.86	1.113	0.901	1.164
High	Master Protein	Q80SY5	Pre-mRNA-splicing factor 38B OS=Mus musculus GN=Prpf38b PE=1 SV=1	0	14	7	57	7	542	63.7	771	57	7	0	0.973	0.969724	6.57	1.113	0.932	0.973
High	Master Protein	Q9CZB0	Succinate dehydrogenase cytochrome b560 subunit, mitochondrial OS=Mus musculus GN=Sdhc PE=1 SV=1	0	39	6	82	6	169	18.4	987	82	6	0	1.305	0.403129	0.15	1.113	1.306	1.305
High	Master Protein	O54829	Regulator of G-protein signaling 7 OS=Mus musculus GN=Rgs7 PE=1 SV=2	0	31	12	63	7	469	54.8	947	63	12	2	1.113	0.930091	8.83	1.113	1.179	0.862
High	Master Protein	D3YXJ5	Family with sequence similarity 84, member B OS=Mus musculus GN=Fam84b PE=1 SV=1	0	22	4	12	4	310	34.6	115	12	4	0	0.89	0.913131	7.21	1.113	0.849	0.89
High	Master Protein	Q8R1B0	SH3 and cysteine-rich domain-containing protein 2 OS=Mus musculus GN=Stac2 PE=1 SV=1	0	22	6	38	6	408	44.8	474	38	6	0	0.94	0.913187	1.66	1.113	0.94	0.93
High	Master Protein	Q91X76	5'-nucleotidase domain-containing 2 OS=Mus musculus GN=Nt5dc2 PE=1 SV=1	0	41	11	38	11	390	46	614	38	11	0	1.113	0.931984	10.31	1.113	1.035	1.307
High	Master Protein	O08553	Dihydropyrimidinase-related protein 2 OS=Mus musculus GN=Dpysl2 PE=1 SV=2	0	87	37	2790	31	572	62.2	80118	2790	37	3	1.112	0.804682	21.04	1.112	0.955	1.407
High	Master Protein	E9PXY8	Ubiquitin carboxyl-terminal hydrolase 7 OS=Mus musculus GN=Usp7 PE=1 SV=1	0	48	40	374	40	1143	132.8	5270	374	40	0	1.029	0.999996	12.03	1.112	1.029	0.917
High	Master Protein	Q6A009	E3 ubiquitin-protein ligase listerin OS=Mus musculus GN=Ltn1 PE=1 SV=3	0	5	5	26	5	1767	198.8	165	26	5	0	1.074	0.9873	5.31	1.112	1.029	1.074
High	Master Protein	Q6PE15	Mycophenolic acid acyl-glucuronide esterase, mitochondrial OS=Mus musculus GN=Abhd10 PE=1 SV=1	0	34	7	111	7	297	33	1587	111	7	0	1.34	0.308591	25.21	1.112	1.635	1.34
High	Master Protein	Q9QZV9	NTF2-related export protein 1 OS=Mus musculus GN=Nxt1 PE=1 SV=2	0	21	2	12	1	140	15.8	206	12	2	0	1.112	0.9873	37.34	1.112	1.551	0.832
High	Master Protein	Q8C561	LMBR1 domain-containing protein 2 OS=Mus musculus GN=Lmbrd2 PE=1 SV=1	0	6	3	24	3	694	81	308	24	3	0	1.067	0.98996	6.35	1.112	1.067	0.885
High	Master Protein	P14148	60S ribosomal protein L7 OS=Mus musculus GN=Rpl7 PE=1 SV=2	0	45	14	174	14	270	31.4	2174	174	14	0	1.112	0.805801	7.63	1.112	1.055	1.21
High	Master Protein	Q9D287	Pre-mRNA-splicing factor SPF27 OS=Mus musculus GN=Bcas2 PE=1 SV=1	0	60	9	74	9	225	26.1	1207	74	9	0	1.06	0.993902	7.3	1.112	1.06	0.852
High	Master Protein	D3YWT0	Signal peptidase complex catalytic subunit SEC11 OS=Mus musculus GN=Sec11a PE=1 SV=1	0	36	5	41	5	170	19.6	425	41	5	0	1.112	0.949158	9.53	1.112	1.183	1.025
High	Master Protein	O88545	COP9 signalosome complex subunit 6 OS=Mus musculus GN=Cops6 PE=1 SV=1	0	57	13	162	13	324	35.9	4024	162	13	0	1.041	0.997312	2.28	1.112	1.041	1.025
High	Master Protein	A0A0G2JEC2	Myocyte-specific enhancer factor 2C OS=Mus musculus GN=Mef2c PE=1 SV=1	0	6	2	21	1	434	47	196	21	2	0	0.92	0.976363	25.55	1.112	0.92	0.672
High	Master Protein	Q8VHI3	GDP-fucose protein O-fucosyltransferase 2 OS=Mus musculus GN=Pofut2 PE=1 SV=1	0	25	8	63	8	429	49.4	632	63	8	0	1.111	0.957638	8.07	1.111	1.172	0.926
High	Master Protein	A0A0R4J0H3	Retinol-binding protein 3 OS=Mus musculus GN=Rbp3 PE=1 SV=1	0	57	47	1100	1	1234	134.4	26278	1100	47	50	0.963	0.976363	19.82	1.111	0.758	0.963
High	Master Protein	Q9DBS8	Centrosomal protein POC5 OS=Mus musculus GN=Poc5 PE=2 SV=1	0	23	8	54	8	558	60.9	649	54	8	0	0.879	0.740349	19.38	1.111	0.879	0.777
High	Master Protein	Q8BVQ9	26S proteasome regulatory subunit 7 OS=Mus musculus GN=Psmc2 PE=1 SV=1	0	53	21	152	21	475	52.8	2396	152	21	0	1.111	0.896209	15.91	1.111	0.992	1.273
High	Master Protein	E9Q720	Regulator of G-protein-signaling 20 OS=Mus musculus GN=Rgs20 PE=1 SV=1	0	11	2	6	2	372	41.6	76	6	2	0	1.111	0.990148	76.6	1.111	1.685	0.512
High	Master Protein	Q920Q8	Influenza virus NS1A-binding protein homolog OS=Mus musculus GN=Ivns1abp PE=1 SV=2	0	6	2	7	2	642	71.5	108	7	2	0	0.967	0.985275	3.66	1.111	0.943	0.967
High	Master Protein	Q922X9	Protein arginine N-methyltransferase 7 OS=Mus musculus GN=Prmt7 PE=1 SV=1	0	4	2	11	2	692	78.3	69	11	2	0	1.111	0.988622	8.08	1.111	1.172	1.012
High	Master Protein	Q8BML9	Glutamine--tRNA ligase OS=Mus musculus GN=Qars PE=1 SV=1	0	41	24	140	23	775	87.6	1333	140	24	0	1.111	0.976363	7.29	1.111	1.283	1.056
High	Master Protein	P84084	ADP-ribosylation factor 5 OS=Mus musculus GN=Arf5 PE=1 SV=2	0	83	12	507	5	180	20.5	12382	507	12	1	1.111	0.955139	5.49	1.111	1.07	1.179
High	Master Protein	Q9EQG7	Ectonucleotide pyrophosphatase/phosphodiesterase family member 5 OS=Mus musculus GN=Enpp5 PE=1 SV=3	0	23	6	37	6	477	54.4	278	37	6	0	1.118	0.960739	0.98	1.111	1.118	1.137
High	Master Protein	Q6NZJ6	Eukaryotic translation initiation factor 4 gamma 1 OS=Mus musculus GN=Eif4g1 PE=1 SV=1	0	15	18	90	16	1600	176	930	90	18	0	1.053	0.999996	8.16	1.111	0.904	1.053
High	Master Protein	Q9Z1A1	TFG protein OS=Mus musculus GN=Tfg PE=1 SV=1	0	44	10	134	10	397	43	2250	134	10	0	1.111	0.960209	34.22	1.111	0.854	1.501
High	Master Protein	Q8BMZ5	tRNA-splicing endonuclease subunit Sen34 OS=Mus musculus GN=Tsen34 PE=2 SV=2	0	19	3	8	3	316	34.2	139	8	3	0	1.26	0.870099	3.96	1.111	1.26	1.293
High	Master Protein	P46467	Vacuolar protein sorting-associated protein 4B OS=Mus musculus GN=Vps4b PE=1 SV=2	0	27	9	23	5	444	49.4	322	23	9	0	1.141	0.91629	4.01	1.111	1.253	1.141
High	Master Protein	P58871	182 kDa tankyrase-1-binding protein OS=Mus musculus GN=Tnks1bp1 PE=1 SV=2	0	23	24	98	24	1720	181.7	1329	98	24	0	1.111	0.976877	3.43	1.111	1.167	1.085
High	Master Protein	Q9DBZ5	Eukaryotic translation initiation factor 3 subunit K OS=Mus musculus GN=Eif3k PE=1 SV=1	0	33	5	46	5	218	25.1	645	46	5	0	1.111	0.976418	3.54	1.111	1.084	1.514
High	Master Protein	Q3UHB1	5'-nucleotidase domain-containing protein 3 OS=Mus musculus GN=Nt5dc3 PE=1 SV=1	0	23	10	46	10	546	63.1	708	46	10	0	1.068	0.984017	5.88	1.111	1.068	1.006
High	Master Protein	P28660	Nck-associated protein 1 OS=Mus musculus GN=Nckap1 PE=1 SV=2	0	39	34	345	34	1128	128.7	5771	345	34	0	1.104	0.931388	0.87	1.11	1.104	1.03
High	Master Protein	P62743	AP-2 complex subunit sigma OS=Mus musculus GN=Ap2s1 PE=1 SV=1	0	43	6	144	6	142	17	2005	144	6	0	1	0.975055	7.92	1.11	1	0.947
High	Master Protein	P60487	Pyridoxal phosphate phosphatase OS=Mus musculus GN=Pdxp PE=1 SV=1	0	53	10	116	10	292	31.5	1169	116	10	0	1.11	0.95823	13	1.11	0.923	1.207
High	Master Protein	P14869	60S acidic ribosomal protein P0 OS=Mus musculus GN=Rplp0 PE=1 SV=3	0	65	17	477	17	317	34.2	13460	477	17	0	1.157	0.611979	5.98	1.11	1.157	1.437
High	Master Protein	Q569Z5	Probable ATP-dependent RNA helicase DDX46 OS=Mus musculus GN=Ddx46 PE=1 SV=2	0	26	19	154	19	1032	117.4	2745	154	19	0	1.11	0.958186	7.57	1.11	1.167	0.998
High	Master Protein	Q7TQG1	Pleckstrin homology domain-containing family A member 6 OS=Mus musculus GN=Plekha6 PE=1 SV=1	0	16	11	31	11	1173	131.3	245	31	11	0	1.11	0.933429	18.12	1.11	0.974	1.355
High	Master Protein	Q8K4Z3	NAD(P)H-hydrate epimerase OS=Mus musculus GN=Naxe PE=1 SV=1	0	33	7	84	7	282	31	1487	84	7	0	1.11	0.976363	4.05	1.11	1.08	1.779
High	Master Protein	Q9DBR1	5'-3' exoribonuclease 2 OS=Mus musculus GN=Xrn2 PE=1 SV=1	0	32	20	153	20	951	108.6	3209	153	20	0	0.985	0.976363	6.52	1.11	0.943	0.985
High	Master Protein	O55234	Proteasome subunit beta type-5 OS=Mus musculus GN=Psmb5 PE=1 SV=3	0	51	14	157	14	264	28.5	3990	157	14	0	1.08	0.907464	1.61	1.11	1.08	1.069
High	Master Protein	D3Z1S8	40S ribosomal protein S5 (Fragment) OS=Mus musculus GN=Rps5 PE=1 SV=1	0	56	12	176	12	189	21.1	3308	176	12	0	1.11	0.843411	4.55	1.11	1.144	1.007
High	Master Protein	A2AIV2	Protein virilizer homolog OS=Mus musculus GN=Kiaa1429 PE=1 SV=1	0	12	13	40	13	1811	201.3	610	40	13	0	1.117	0.938194	0.97	1.11	1.279	1.117
High	Master Protein	E9QM90	RIKEN cDNA 2310035C23 gene OS=Mus musculus GN=2310035C23Rik PE=1 SV=2	0	36	32	248	2	1216	134.5	2978	248	32	29	1.161	0.858533	2.96	1.109	1.161	1.184
High	Master Protein	G3UVU2	Splicing factor 3A subunit 2 OS=Mus musculus GN=Sf3a2 PE=1 SV=1	0	36	15	201	15	485	51.2	2799	201	15	0	1.085	0.97792	3.25	1.109	1.085	0.903
High	Master Protein	A0A0R4J2B2	BTB/POZ domain-containing protein KCTD12 OS=Mus musculus GN=Kctd12 PE=1 SV=1	0	19	5	29	5	327	35.9	95	29	5	0	1.109	0.956465	10.64	1.109	1.207	1.029
High	Master Protein	O35435	Dihydroorotate dehydrogenase (quinone), mitochondrial OS=Mus musculus GN=Dhodh PE=1 SV=2	0	20	5	22	5	395	42.7	203	22	5	0	1.044	0.999996	9.22	1.109	0.941	1.044
High	Master Protein	Q9D2E2	Target of EGR1 protein 1 OS=Mus musculus GN=Toe1 PE=1 SV=1	0	20	8	12	8	511	56.8	106	12	8	0	1.108	0.976401	13.81	1.108	1.212	0.963
High	Master Protein	Q99L13	3-hydroxyisobutyrate dehydrogenase, mitochondrial OS=Mus musculus GN=Hibadh PE=1 SV=1	0	53	10	254	10	335	35.4	8283	254	10	0	1.108	0.839623	12.38	1.108	1.016	1.335
High	Master Protein	Q4KUS2	Protein unc-13 homolog A OS=Mus musculus GN=Unc13a PE=1 SV=3	0	7	8	20	4	1712	193.7	257	20	8	0	1.108	0.989059	2.66	1.108	1.128	0.904
High	Master Protein	Q9R190	Metastasis-associated protein MTA2 OS=Mus musculus GN=Mta2 PE=1 SV=1	0	50	29	194	23	668	75	3070	194	29	5	1.108	0.914154	2.72	1.108	1.129	0.928
High	Master Protein	Q3V3R1	Monofunctional C1-tetrahydrofolate synthase, mitochondrial OS=Mus musculus GN=Mthfd1l PE=1 SV=2	0	36	25	136	25	977	105.7	2924	136	25	0	1.133	0.916864	3.28	1.108	1.133	1.369
High	Master Protein	O55106	Striatin OS=Mus musculus GN=Strn PE=1 SV=2	0	23	11	73	11	780	85.9	1028	73	11	0	1.005	0.985275	15.12	1.108	1.005	0.835
High	Master Protein	Q9CQX2	Cytochrome b5 type B OS=Mus musculus GN=Cyb5b PE=1 SV=1	0	67	7	409	7	146	16.3	7848	409	7	0	1.108	0.819702	2.73	1.108	1.064	1.128
High	Master Protein	P47791	Glutathione reductase, mitochondrial OS=Mus musculus GN=Gsr PE=1 SV=3	0	58	16	114	16	500	53.6	1477	114	16	0	1.029	0.993902	11.41	1.108	1.029	0.928
High	Master Protein	Q91YQ3	Cold shock domain-containing protein C2 OS=Mus musculus GN=Csdc2 PE=1 SV=2	0	38	3	8	3	154	16.8	171	8	3	0	1.165	0.967561	7.22	1.108	1.165	1.415
High	Master Protein	B1AU25	Apoptosis-inducing factor 1, mitochondrial OS=Mus musculus GN=Aifm1 PE=1 SV=1	0	46	17	113	17	608	66.1	1645	113	17	0	0.863	0.407784	32.75	1.108	0.704	0.863
High	Master Protein	P84086	Complexin-2 OS=Mus musculus GN=Cplx2 PE=1 SV=1	0	59	7	184	4	134	15.4	5290	184	7	4	1.079	0.907464	3.98	1.108	0.761	1.079
High	Master Protein	O55229	Choline/ethanolamine kinase OS=Mus musculus GN=Chkb PE=1 SV=3	0	19	6	28	6	394	45.1	238	28	6	0	1.108	0.955139	38.45	1.108	0.726	1.395
High	Master Protein	A0A1L1SQE2	Jouberin OS=Mus musculus GN=Ahi1 PE=1 SV=1	0	28	20	78	20	1005	114.9	487	78	20	0	0.93	0.894632	23.72	1.108	0.93	0.699
High	Master Protein	Q5SVG5	AP complex subunit beta OS=Mus musculus GN=Ap1b1 PE=1 SV=1	0	55	44	768	23	916	101.1	18318	768	44	0	1.035	0.984032	10.43	1.108	1.035	0.938
High	Master Protein	Q8BWR2	PITH domain-containing protein 1 OS=Mus musculus GN=Pithd1 PE=1 SV=1	0	57	9	82	9	211	24.2	1632	82	9	0	1.133	0.926832	3.33	1.107	1.133	1.267
High	Master Protein	P52912	Nucleolysin TIA-1 OS=Mus musculus GN=Tia1 PE=1 SV=1	0	24	6	43	4	386	42.8	726	43	6	0	1.107	0.960995	16.47	1.107	0.833	1.23
High	Master Protein	Q03517	Secretogranin-2 OS=Mus musculus GN=Scg2 PE=1 SV=1	0	18	7	40	7	617	70.6	964	40	7	0	1.102	0.960995	0.66	1.107	0.829	1.102
High	Master Protein	Q91XH6	Vesicle transport through interaction with t-SNAREs 1B homolog OS=Mus musculus GN=Vti1b PE=1 SV=1	0	31	6	17	6	232	26.7	305	17	6	0	1.106	0.949158	2.2	1.106	0.999	1.123
High	Master Protein	Q8K0T2	Cytoplasmic dynein 2 light intermediate chain 1 OS=Mus musculus GN=Dync2li1 PE=1 SV=1	0	21	4	16	4	351	39.4	91	16	4	0	1.006	0.988622	9.96	1.106	1.006	0.938
High	Master Protein	Q8CJF7	Protein ELYS OS=Mus musculus GN=Ahctf1 PE=1 SV=1	0	11	14	41	14	2243	247.5	475	41	14	0	1.106	0.95823	11.58	1.106	1.218	1.02
High	Master Protein	P42208	Septin-2 OS=Mus musculus GN=Sept2 PE=1 SV=2	0	58	17	185	16	361	41.5	3465	185	17	0	1.142	0.841897	4.59	1.106	1.142	1.345
High	Master Protein	Q9D735	Uncharacterized protein C19orf43 homolog OS=Mus musculus PE=1 SV=1	0	29	4	62	4	173	18.4	201	62	4	0	1.106	0.957638	1.89	1.106	1.12	0.737
High	Master Protein	Q8K4B0	Metastasis-associated protein MTA1 OS=Mus musculus GN=Mta1 PE=1 SV=1	0	41	23	107	17	715	80.7	1643	107	23	3	1.124	0.945863	2.16	1.106	1.124	1.14
High	Master Protein	P48722	Heat shock 70 kDa protein 4L OS=Mus musculus GN=Hspa4l PE=1 SV=2	0	71	54	1085	52	838	94.3	22263	1085	54	3	0.994	0.996172	2.7	1.106	0.976	0.994
High	Master Protein	Q3U3M5	Cyclin-K OS=Mus musculus GN=Ccnk PE=1 SV=1	0	14	4	48	4	582	64.3	872	48	4	0	1.036	0.999996	0.66	1.106	1.036	1.032
High	Master Protein	Q99KP6	Pre-mRNA-processing factor 19 OS=Mus musculus GN=Prpf19 PE=1 SV=1	0	81	24	451	24	504	55.2	7112	451	24	0	1.092	0.87607	1.88	1.106	1.092	0.84
High	Master Protein	Q8R570	Synaptosomal-associated protein 47 OS=Mus musculus GN=Snap47 PE=1 SV=1	0	50	17	97	17	413	46.5	2300	97	17	0	1.106	0.976859	30.05	1.106	1.482	0.882
High	Master Protein	Q3UGR5	Haloacid dehalogenase-like hydrolase domain-containing protein 2 OS=Mus musculus GN=Hdhd2 PE=1 SV=2	0	56	8	134	8	259	28.7	2104	134	8	0	1.106	0.964925	21.82	1.106	0.943	1.298
High	Master Protein	Q91VH1	Adiponectin receptor protein 1 OS=Mus musculus GN=Adipor1 PE=1 SV=1	0	16	4	62	4	375	42.3	401	62	4	0	1.106	0.976363	11.42	1.106	0.914	1.191
High	Master Protein	Q8BL63	GPI-anchor transamidase OS=Mus musculus GN=Pigk PE=1 SV=1	0	12	4	14	4	442	49.8	271	14	4	0	1.106	0.976363	7.08	1.106	1.158	0.946
High	Master Protein	Q9EPE9	Manganese-transporting ATPase 13A1 OS=Mus musculus GN=Atp13a1 PE=1 SV=2	0	19	15	70	15	1200	132.3	674	70	15	0	1.087	0.982703	2.55	1.106	1.087	0.975
High	Master Protein	E9PWE8	Dihydropyrimidinase-related protein 3 OS=Mus musculus GN=Dpysl3 PE=1 SV=1	0	77	38	1320	32	683	73.8	36079	1320	38	8	0.923	0.883258	5.56	1.106	0.89	0.923
High	Master Protein	P61089	Ubiquitin-conjugating enzyme E2 N OS=Mus musculus GN=Ube2n PE=1 SV=1	0	61	10	97	10	152	17.1	2213	97	10	0	1.109	0.819442	0.46	1.106	1.109	1.45
High	Master Protein	P45481	CREB-binding protein OS=Mus musculus GN=Crebbp PE=1 SV=3	0	8	14	34	6	2441	265.3	465	34	14	7	1.096	0.969724	1.33	1.106	1.038	1.096
High	Master Protein	Q9ER64	Oxysterol-binding protein-related protein 5 OS=Mus musculus GN=Osbpl5 PE=1 SV=3	0	3	2	10	2	874	98.9	97	10	2	0	1.091	0.993902	1.94	1.105	0.941	1.091
High	Master Protein	S4R2K9	Ankyrin-3 (Fragment) OS=Mus musculus GN=Ank3 PE=1 SV=1	0	38	70	462	2	2622	284.5	8658	462	70	56	1.193	0.540013	0.62	1.105	1.193	1.198
High	Master Protein	Q6P5B5	Fragile X mental retardation syndrome-related protein 2 OS=Mus musculus GN=Fxr2 PE=1 SV=1	0	27	13	91	12	674	74.2	2136	91	13	0	0.977	0.935936	2.99	1.105	0.977	0.957
High	Master Protein	Q9EPL8	Importin-7 OS=Mus musculus GN=Ipo7 PE=1 SV=2	0	35	31	270	30	1038	119.4	7074	270	31	1	1.199	0.518074	11.66	1.105	1.327	1.199
High	Master Protein	P48962	ADP/ATP translocase 1 OS=Mus musculus GN=Slc25a4 PE=1 SV=4	0	71	28	3657	14	298	32.9	130939	3657	28	26	1.105	0.831778	6.73	1.105	1.205	1.055
High	Master Protein	Q8VDJ3	Vigilin OS=Mus musculus GN=Hdlbp PE=1 SV=1	0	35	30	254	30	1268	141.7	6549	254	30	0	1.105	0.937338	6.16	1.105	1.059	1.179
High	Master Protein	P62751	60S ribosomal protein L23a OS=Mus musculus GN=Rpl23a PE=1 SV=1	0	55	11	95	11	156	17.7	1170	95	11	0	1.105	0.823858	4.86	1.105	1.141	0.866
High	Master Protein	Q3UM45	Protein phosphatase 1 regulatory subunit 7 OS=Mus musculus GN=Ppp1r7 PE=1 SV=2	0	55	14	70	14	361	41.3	1638	70	14	0	1.227	0.477272	3.69	1.105	1.227	1.258
High	Master Protein	P58158	Galactosylgalactosylxylosylprotein 3-beta-glucuronosyltransferase 3 OS=Mus musculus GN=B3gat3 PE=1 SV=1	0	24	6	49	6	335	37	110	49	6	0	1.105	0.976653	8.29	1.105	1.043	1.76
High	Master Protein	Q99N96	39S ribosomal protein L1, mitochondrial OS=Mus musculus GN=Mrpl1 PE=1 SV=2	0	15	3	8	3	336	37.6	120	8	3	0	1.105	0.984558	34.32	1.105	1.36	0.569
High	Master Protein	H3BLL2	ATP synthase mitochondrial F1 complex assembly factor 1 OS=Mus musculus GN=Atpaf1 PE=1 SV=1	0	23	6	14	6	348	38.8	116	14	6	0	1.199	0.777452	11.65	1.104	1.199	1.537
High	Master Protein	Q9R0X4	Acyl-coenzyme A thioesterase 9, mitochondrial OS=Mus musculus GN=Acot9 PE=1 SV=1	0	36	12	75	12	439	50.5	765	75	12	0	1.132	0.922003	3.6	1.104	1.132	1.515
High	Master Protein	Q8K440	ATP-binding cassette sub-family A member 8-B OS=Mus musculus GN=Abca8b PE=1 SV=2	0	26	29	174	27	1620	182.9	3712	174	29	2	1.056	0.994489	6.76	1.104	0.96	1.056
High	Master Protein	Q9CQC7	NADH dehydrogenase [ubiquinone] 1 beta subcomplex subunit 4 OS=Mus musculus GN=Ndufb4 PE=1 SV=3	0	54	7	226	7	129	15.1	3326	226	7	0	0.959	0.923745	19.54	1.104	0.959	0.717
High	Master Protein	P62259	14-3-3 protein epsilon OS=Mus musculus GN=Ywhae PE=1 SV=1	0	75	18	1656	16	255	29.2	47096	1656	18	0	1.104	0.83571	13.04	1.104	0.957	1.201
High	Master Protein	O08576	RUN domain-containing protein 3A OS=Mus musculus GN=Rundc3a PE=1 SV=1	0	22	6	26	5	446	50	232	26	6	1	0.969	0.969786	7.48	1.104	0.969	0.923
High	Master Protein	P84096	Rho-related GTP-binding protein RhoG OS=Mus musculus GN=Rhog PE=1 SV=1	0	47	6	72	5	191	21.3	1344	72	6	0	1.027	0.999996	4.56	1.103	0.995	1.027
High	Master Protein	Q9D0L8	mRNA cap guanine-N7 methyltransferase OS=Mus musculus GN=Rnmt PE=1 SV=1	0	49	18	182	18	465	53.3	3765	182	18	0	1.06	0.990989	6.02	1.103	1.06	0.967
High	Master Protein	F6ZS70	Non-specific serine/threonine protein kinase (Fragment) OS=Mus musculus GN=Mark2 PE=1 SV=1	0	31	16	56	12	776	86.5	868	56	16	2	1.009	0.993902	11.8	1.103	0.929	1.009
High	Master Protein	Q3UID0	SWI/SNF complex subunit SMARCC2 OS=Mus musculus GN=Smarcc2 PE=1 SV=1	0	41	37	498	28	1130	124.6	9538	498	37	11	1.063	0.945863	5.4	1.103	1.063	1.024
High	Master Protein	Q60692	Proteasome subunit beta type-6 OS=Mus musculus GN=Psmb6 PE=1 SV=3	0	45	7	192	7	238	25.4	2224	192	7	0	1.103	0.943577	15.62	1.103	0.933	1.219
High	Master Protein	Q91YN0	Protein C12orf4 homolog OS=Mus musculus GN=D6Wsu163e PE=1 SV=1	0	11	3	18	3	552	63.6	200	18	3	0	1.357	0.621105	27.8	1.103	1.721	1.357
High	Master Protein	P59708	Splicing factor 3B subunit 6 OS=Mus musculus GN=Sf3b6 PE=1 SV=1	0	32	3	22	3	125	14.6	552	22	3	0	1.103	0.976363	2.98	1.103	1.413	1.08
High	Master Protein	Q3UVK0	Endoplasmic reticulum metallopeptidase 1 OS=Mus musculus GN=Ermp1 PE=1 SV=2	0	13	8	21	8	898	100.1	191	21	8	0	1.102	0.973416	57.44	1.102	1.71	0.675
High	Master Protein	Q8K441	ATP-binding cassette sub-family A member 6 OS=Mus musculus GN=Abca6 PE=1 SV=2	0	4	4	16	4	1624	183.2	71	16	4	0	1.102	0.988622	45.57	1.102	0.764	1.594
High	Master Protein	Q8BKR5	Protein phosphatase 1 regulatory subunit 37 OS=Mus musculus GN=Ppp1r37 PE=1 SV=1	0	2	1	16	1	712	77.5	216	16	1	0	1.102	0.990823	26.47	1.102	0.889	1.299
High	Master Protein	P42669	Transcriptional activator protein Pur-alpha OS=Mus musculus GN=Pura PE=1 SV=1	0	58	15	411	13	321	34.9	7635	411	15	3	1.111	0.810435	1.15	1.102	1.111	1.155
High	Master Protein	A0A1B0GRU8	Pre-mRNA-processing factor 40 homolog A OS=Mus musculus GN=Prpf40a PE=1 SV=1	0	22	16	74	15	926	105.5	732	74	16	1	1.102	0.965149	23.7	1.102	1.278	0.846
High	Master Protein	Q6IFX2	Keratin, type I cytoskeletal 42 OS=Mus musculus GN=Krt42 PE=1 SV=1	0	32	19	144	7	452	50.1	1432	144	19	4	0.897	0.769977	27.57	1.102	0.545	0.897
High	Master Protein	O88342	WD repeat-containing protein 1 OS=Mus musculus GN=Wdr1 PE=1 SV=3	0	66	28	610	28	606	66.4	17207	610	28	0	1.102	0.841633	9.66	1.102	1.03	1.416
High	Master Protein	Q9QXS6	Drebrin OS=Mus musculus GN=Dbn1 PE=1 SV=4	0	39	21	217	13	706	77.2	3735	217	21	9	1.102	0.896574	5.76	1.102	1.051	1.144
High	Master Protein	P14685	26S proteasome non-ATPase regulatory subunit 3 OS=Mus musculus GN=Psmd3 PE=1 SV=3	0	50	25	188	25	530	60.7	3000	188	25	0	1.167	0.685005	3.73	1.101	1.196	1.167
High	Master Protein	Q8R0P4	Mth938 domain-containing protein OS=Mus musculus GN=Aamdc PE=1 SV=1	0	30	3	15	3	122	13.2	123	15	3	0	1.101	0.964925	17.21	1.101	0.973	1.662
High	Master Protein	H7BX08	Calmodulin-regulated spectrin-associated protein 2 OS=Mus musculus GN=Camsap2 PE=1 SV=1	0	22	20	88	11	1478	166	1118	88	20	7	0.965	0.960926	1.35	1.101	0.965	0.957
High	Master Protein	P52480	Pyruvate kinase PKM OS=Mus musculus GN=Pkm PE=1 SV=4	0	85	48	5952	46	531	57.8	164941	5952	48	2	1.091	0.879381	1.44	1.101	0.852	1.091
High	Master Protein	Q9EQ06	Estradiol 17-beta-dehydrogenase 11 OS=Mus musculus GN=Hsd17b11 PE=1 SV=1	0	43	8	29	8	298	32.9	279	29	8	0	0.943	0.914154	3.48	1.101	0.943	0.921
High	Master Protein	Q9Z1F9	SUMO-activating enzyme subunit 2 OS=Mus musculus GN=Uba2 PE=1 SV=1	0	61	28	316	28	638	70.5	6930	316	28	0	1.101	0.878206	13.85	1.101	0.998	1.245
High	Master Protein	Q9D9V3	Ethylmalonyl-CoA decarboxylase OS=Mus musculus GN=Echdc1 PE=1 SV=2	0	20	4	30	4	322	35.4	404	30	4	0	1.101	0.967561	5.6	1.101	1.143	0.959
High	Master Protein	P35235	Tyrosine-protein phosphatase non-receptor type 11 OS=Mus musculus GN=Ptpn11 PE=1 SV=2	0	55	26	205	26	597	68.4	3435	205	26	0	1.14	0.901594	5.08	1.101	1.14	1.343
High	Master Protein	F8VQC7	Kinectin OS=Mus musculus GN=Ktn1 PE=1 SV=1	0	50	52	530	1	1327	152.4	11113	530	52	50	0.972	0.984017	4.74	1.101	0.941	0.972
High	Master Protein	Q8C163	Nuclease EXOG, mitochondrial OS=Mus musculus GN=Exog PE=1 SV=1	0	44	12	85	12	368	41.4	1273	85	12	0	1.164	0.892669	8.1	1.101	1.294	1.164
High	Master Protein	O70589	Peripheral plasma membrane protein CASK OS=Mus musculus GN=Cask PE=1 SV=2	0	50	34	291	34	926	105	4225	291	34	0	1.094	0.976363	0.86	1.1	1.001	1.094
High	Master Protein	Q8CGC7	Bifunctional glutamate/proline--tRNA ligase OS=Mus musculus GN=Eprs PE=1 SV=4	0	54	58	518	57	1512	170	11651	518	58	1	1.5	0.00219339	1.4	1.1	1.5	1.514
High	Master Protein	F8WIV2	Serine (or cysteine) peptidase inhibitor, clade B, member 6a OS=Mus musculus GN=Serpinb6a PE=1 SV=1	0	20	7	35	7	399	44.7	492	35	7	0	1.546	0.0595918	1.63	1.1	1.563	1.546
High	Master Protein	Q5U4C2	Dipeptidyl aminopeptidase-like protein 6 OS=Mus musculus GN=Dpp6 PE=1 SV=1	0	36	22	218	21	801	91.1	3955	218	22	1	1.065	0.991621	4.84	1.1	1.03	1.065
High	Master Protein	Q8C863	E3 ubiquitin-protein ligase Itchy OS=Mus musculus GN=Itch PE=1 SV=2	0	11	6	25	6	864	98.9	72	25	6	0	1.1	0.993902	12.03	1.1	1.281	1.011
High	Master Protein	P83741	Serine/threonine-protein kinase WNK1 OS=Mus musculus GN=Wnk1 PE=1 SV=2	0	5	5	17	5	2377	250.8	203	17	5	0	1.1	0.976653	5.15	1.1	1.062	1.239
High	Master Protein	P52623	Uridine-cytidine kinase 1 OS=Mus musculus GN=Uck1 PE=1 SV=2	0	22	5	61	5	277	31	867	61	5	0	0.991	0.984017	1.69	1.1	0.991	0.98
High	Master Protein	Q99LM9	Transcriptional adapter 1 OS=Mus musculus GN=Tada1 PE=2 SV=1	0	4	1	10	1	335	37.4	54	10	1	0	0.905	0.960926	26.1	1.1	0.905	0.77
High	Master Protein	Q9D1P4	Cysteine and histidine-rich domain-containing protein 1 OS=Mus musculus GN=Chordc1 PE=1 SV=1	0	26	7	42	7	331	37.3	281	42	7	0	1.318	0.337776	2.81	1.1	1.318	1.343
High	Master Protein	Q3TYX3	SET and MYND domain-containing protein 5 OS=Mus musculus GN=Smyd5 PE=1 SV=2	0	12	3	16	3	416	47.1	186	16	3	0	1.1	0.976845	15.27	1.1	0.986	1.426
High	Master Protein	Q61171	Peroxiredoxin-2 OS=Mus musculus GN=Prdx2 PE=1 SV=3	0	73	12	654	12	198	21.8	21164	654	12	0	1.057	0.957003	5.91	1.1	0.946	1.057
High	Master Protein	Q99JR6	Nicotinamide/nicotinic acid mononucleotide adenylyltransferase 3 OS=Mus musculus GN=Nmnat3 PE=1 SV=1	0.001	8	1	2	1	245	27.7	67	2	1	0	1.605	0.519854	4.31	1.1	1.605	1.652
High	Master Protein	A0A1B0GRV0	3'(2'),5'-bisphosphate nucleotidase 1 OS=Mus musculus GN=Bpnt1 PE=1 SV=1	0	67	16	191	2	323	35	4090	191	16	13	1.099	0.923566	15.56	1.099	0.984	1.908
High	Master Protein	Q3UHU5	Microtubule cross-linking factor 1 OS=Mus musculus GN=Mtcl1 PE=1 SV=1	0	13	17	61	16	1945	213.7	621	61	17	1	0.945	0.930091	1.72	1.099	0.934	0.945
High	Master Protein	O54833	Casein kinase II subunit alpha' OS=Mus musculus GN=Csnk2a2 PE=1 SV=1	0	53	12	142	12	350	41.2	1595	142	12	0	1.108	0.976845	1.2	1.099	1.345	1.108
High	Master Protein	E9QL65	Conserved oligomeric Golgi complex subunit 3 OS=Mus musculus GN=Cog3 PE=1 SV=1	0	15	8	25	8	828	94.1	279	25	8	0	1.099	0.967307	13.22	1.099	1.001	1.331
High	Master Protein	Q7TQ95	Protein lunapark OS=Mus musculus GN=Lnp PE=1 SV=1	0	32	8	39	8	425	47.5	555	39	8	0	1.001	0.986599	14.55	1.099	1.001	0.7
High	Master Protein	O88351	Inhibitor of nuclear factor kappa-B kinase subunit beta OS=Mus musculus GN=Ikbkb PE=1 SV=1	0	8	4	8	4	757	86.6	88	8	4	0	1.147	0.984017	6.21	1.099	1.32	1.147
High	Master Protein	Q80YR5	Scaffold attachment factor B2 OS=Mus musculus GN=Safb2 PE=1 SV=2	0	26	19	205	14	991	111.8	3965	205	19	0	0.895	0.783755	9.97	1.099	0.895	0.839
High	Master Protein	Q9D0G0	28S ribosomal protein S30, mitochondrial OS=Mus musculus GN=Mrps30 PE=1 SV=1	0	28	9	24	9	442	49.9	97	24	9	0	1.004	0.998622	7.62	1.099	0.952	1.004
High	Master Protein	P38647	Stress-70 protein, mitochondrial OS=Mus musculus GN=Hspa9 PE=1 SV=3	0	72	46	815	45	679	73.4	23826	815	46	1	1.016	0.993902	2.82	1.098	0.997	1.016
High	Master Protein	Q8C570	mRNA export factor OS=Mus musculus GN=Rae1 PE=1 SV=1	0	41	11	62	11	368	40.9	752	62	11	0	0.977	0.946864	1.18	1.098	0.977	0.969
High	Master Protein	Q6NVF0	Inositol polyphosphate 5-phosphatase OCRL-1 OS=Mus musculus GN=Ocrl PE=1 SV=1	0	18	12	84	12	900	104.2	867	84	12	0	1.098	0.964925	6.2	1.098	1.053	1.271
High	Master Protein	P63276	40S ribosomal protein S17 OS=Mus musculus GN=Rps17 PE=1 SV=2	0	59	7	165	7	135	15.5	3952	165	7	0	1.098	0.934322	11.28	1.098	1.182	1.014
High	Master Protein	Q9DCT5	Stromal cell-derived factor 2 OS=Mus musculus GN=Sdf2 PE=1 SV=1	0	57	6	40	6	211	23.1	512	40	6	0	1.098	0.965018	16.36	1.098	0.954	1.219
High	Master Protein	E9PZM7	SR-related CTD-associated factor 11 OS=Mus musculus GN=Scaf11 PE=1 SV=1	0	11	11	81	11	1456	162	1350	81	11	0	0.957	0.955139	18.99	1.098	0.957	0.797
High	Master Protein	Q3V384	AFG1-like ATPase OS=Mus musculus GN=Afg1l PE=1 SV=1	0	25	7	21	7	480	54.3	95	21	7	0	0.972	0.967313	16.95	1.098	0.972	0.828
High	Master Protein	Q9Z1Z0	General vesicular transport factor p115 OS=Mus musculus GN=Uso1 PE=1 SV=2	0	44	30	419	30	959	106.9	9893	419	30	0	1.097	0.858298	10.34	1.097	1.021	1.325
High	Master Protein	Q64737	Trifunctional purine biosynthetic protein adenosine-3 OS=Mus musculus GN=Gart PE=1 SV=3	0	35	23	127	23	1010	107.4	2099	127	23	0	1.175	0.878206	8.47	1.097	1.175	1.243
High	Master Protein	B2RXC1	Trafficking protein particle complex subunit 11 OS=Mus musculus GN=Trappc11 PE=1 SV=1	0	28	19	130	19	1133	128.3	1427	130	19	0	0.958	0.897462	6.72	1.097	0.916	0.958
High	Master Protein	E0CZ78	Serine/threonine-protein phosphatase OS=Mus musculus GN=Ppp3cb PE=1 SV=1	0	43	18	132	11	524	59	1843	132	18	0	1.097	0.984017	5.16	1.097	0.864	1.135
High	Master Protein	Q80X50	Ubiquitin-associated protein 2-like OS=Mus musculus GN=Ubap2l PE=1 SV=1	0	31	19	118	1	1107	116.7	2525	118	19	18	0.986	0.97539	10.62	1.097	0.92	0.986
High	Master Protein	Q8K3H0	DCC-interacting protein 13-alpha OS=Mus musculus GN=Appl1 PE=1 SV=1	0	33	16	89	15	707	79.3	1621	89	16	1	1.097	0.98287	23.18	1.097	0.912	1.269
High	Master Protein	Q61210	Rho guanine nucleotide exchange factor 1 OS=Mus musculus GN=Arhgef1 PE=1 SV=2	0	10	7	38	7	920	102.7	420	38	7	0	1.238	0.809169	11.89	1.097	1.238	1.337
High	Master Protein	Q9QXK7	Cleavage and polyadenylation specificity factor subunit 3 OS=Mus musculus GN=Cpsf3 PE=1 SV=2	0	28	11	58	11	684	77.5	719	58	11	0	1.032	0.999996	9.33	1.097	0.931	1.032
High	Master Protein	Q8CFW7	Coiled-coil and C2 domain-containing protein 2A OS=Mus musculus GN=Cc2d2a PE=1 SV=1	0	7	5	13	5	1633	187.4	91	13	5	0	0.845	0.907464	4.58	1.097	0.82	0.845
High	Master Protein	Q9WTX6	Cullin-1 OS=Mus musculus GN=Cul1 PE=1 SV=1	0	26	15	121	15	776	89.6	2325	121	15	0	1.096	0.976653	2.33	1.096	1.32	1.079
High	Master Protein	Q8VCF0	Mitochondrial antiviral-signaling protein OS=Mus musculus GN=Mavs PE=1 SV=1	0	29	7	31	7	503	53.4	324	31	7	0	1.096	0.966138	12.32	1.096	1.187	0.948
High	Master Protein	Q5M8N0	CB1 cannabinoid receptor-interacting protein 1 OS=Mus musculus GN=Cnrip1 PE=1 SV=1	0	69	8	189	8	164	18.6	4453	189	8	0	1.096	0.980422	14	1.096	0.928	1.2
High	Master Protein	Q5SRY7	F-box/WD repeat-containing protein 11 OS=Mus musculus GN=Fbxw11 PE=1 SV=1	0	4	1	5	1	542	62	82	5	1	0	1.096	0.997037	44.69	1.096	0.766	1.574
High	Master Protein	E9PZJ8	Activating signal cointegrator 1 complex subunit 3 OS=Mus musculus GN=Ascc3 PE=1 SV=1	0	5	6	19	6	2198	250.4	106	19	6	0	1.096	0.982705	15.04	1.096	1.207	0.71
High	Master Protein	Q9DCV7	Keratin, type II cytoskeletal 7 OS=Mus musculus GN=Krt7 PE=1 SV=1	0	31	14	266	8	457	50.7	3801	266	14	0	1.096	0.884957	9.8	1.096	1.39	1.024
High	Master Protein	P28738	Kinesin heavy chain isoform 5C OS=Mus musculus GN=Kif5c PE=1 SV=3	0	54	45	462	29	956	109.2	7775	462	45	4	1.096	0.956465	3.35	1.096	0.977	1.121
High	Master Protein	P58252	Elongation factor 2 OS=Mus musculus GN=Eef2 PE=1 SV=2	0	72	54	918	53	858	95.3	19953	918	54	1	1.205	0.398641	7.78	1.096	1.269	1.205
High	Master Protein	P27659	60S ribosomal protein L3 OS=Mus musculus GN=Rpl3 PE=1 SV=3	0	48	20	370	20	403	46.1	7204	370	20	0	1.096	0.864423	3.24	1.096	1.072	1.246
High	Master Protein	Q9DB15	39S ribosomal protein L12, mitochondrial OS=Mus musculus GN=Mrpl12 PE=1 SV=2	0	37	5	38	5	201	21.7	528	38	5	0	0.875	0.724772	11.97	1.096	0.81	0.875
High	Master Protein	Q8C804	Spindle and centriole-associated protein 1 OS=Mus musculus GN=Spice1 PE=1 SV=2	0	7	3	14	3	860	95.6	64	14	3	0	1.106	0.976401	1.39	1.096	1.106	1.219
High	Master Protein	Q6R891	Neurabin-2 OS=Mus musculus GN=Ppp1r9b PE=1 SV=1	0	36	19	157	18	817	89.5	3890	157	19	1	1.048	0.999996	6.72	1.096	1.048	0.979
High	Master Protein	Q6AXB7	Fragile X mental retardation syndrome 1 homolog OS=Mus musculus GN=Fmr1 PE=1 SV=1	0	22	12	59	12	614	68.8	915	59	12	0	1.096	0.976363	11.05	1.096	0.948	1.177
High	Master Protein	Q9JKX6	ADP-sugar pyrophosphatase OS=Mus musculus GN=Nudt5 PE=1 SV=1	0	12	2	5	2	218	24	58	5	2	0	1.096	0.999996	27.26	1.096	0.894	1.475
High	Master Protein	P09103	Protein disulfide-isomerase OS=Mus musculus GN=P4hb PE=1 SV=2	0	67	33	547	31	509	57	14711	547	33	2	1.095	0.866403	19.7	1.095	0.95	1.275
High	Master Protein	Q8CCJ3	E3 UFM1-protein ligase 1 OS=Mus musculus GN=Ufl1 PE=1 SV=2	0	13	9	59	9	793	89.5	805	59	9	0	0.897	0.767254	3.49	1.095	0.876	0.897
High	Master Protein	Q91VA7	Isocitrate dehydrogenase [NAD] subunit, mitochondrial OS=Mus musculus GN=Idh3b PE=1 SV=1	0	58	21	525	21	384	42.2	14714	525	21	0	1.095	0.86681	8.77	1.095	1.007	1.16
High	Master Protein	P56388	Cocaine- and amphetamine-regulated transcript protein OS=Mus musculus GN=Cartpt PE=1 SV=2	0	39	6	55	6	129	14.3	753	55	6	0	1.193	0.790779	12.19	1.095	1.193	1.551
High	Master Protein	F6V0P5	Calcium-activated potassium channel subunit alpha-1 OS=Mus musculus GN=Kcnma1 PE=1 SV=2	0	7	5	28	5	1086	122.1	367	28	5	0	1.125	0.9873	3.94	1.095	1.346	1.125
High	Master Protein	Q9DB29	Isoamyl acetate-hydrolyzing esterase 1 homolog OS=Mus musculus GN=Iah1 PE=1 SV=1	0	28	5	27	5	249	28	180	27	5	0	1.095	0.938879	44.42	1.095	1.423	0.754
High	Master Protein	Q6ZPL9	ATP-dependent RNA helicase DDX55 OS=Mus musculus GN=Ddx55 PE=1 SV=2	0	9	4	12	4	600	68.4	353	12	4	0	0.97	0.976653	16.86	1.095	0.97	0.8
High	Master Protein	O55057	Retinal rod rhodopsin-sensitive cGMP 3',5'-cyclic phosphodiesterase subunit delta OS=Mus musculus GN=Pde6d PE=1 SV=1	0	35	5	52	5	150	17.3	1684	52	5	0	1.095	0.981353	13.18	1.095	1.24	0.997
High	Master Protein	Q8BGB7	Enolase-phosphatase E1 OS=Mus musculus GN=Enoph1 PE=1 SV=1	0	28	6	67	6	257	28.6	665	67	6	0	1.095	0.985055	3.47	1.095	0.894	1.12
High	Master Protein	E9Q6R4	AT-rich interactive domain 1B (SWI-like) OS=Mus musculus GN=Arid1b PE=1 SV=1	0	12	14	78	13	2243	236.9	750	78	14	0	1.118	0.934897	3.07	1.095	1.247	1.118
High	Master Protein	Q05BE7	Numb protein OS=Mus musculus GN=Numb PE=1 SV=1	0	16	4	17	4	322	36.2	284	17	4	0	1.094	0.977506	1.59	1.094	1.03	1.106
High	Master Protein	Q9JHL1	Na(+)/H(+) exchange regulatory cofactor NHE-RF2 OS=Mus musculus GN=Slc9a3r2 PE=1 SV=2	0	30	7	55	7	337	37.4	799	55	7	0	1.094	0.967561	9.19	1.094	1.162	0.953
High	Master Protein	Q9CQR6	Serine/threonine-protein phosphatase 6 catalytic subunit OS=Mus musculus GN=Ppp6c PE=1 SV=1	0	35	8	33	8	305	35.1	370	33	8	0	1.094	0.956033	5.81	1.094	1.052	1.713
High	Master Protein	P80318	T-complex protein 1 subunit gamma OS=Mus musculus GN=Cct3 PE=1 SV=1	0	65	32	326	32	545	60.6	4991	326	32	0	1.094	0.868786	6	1.094	0.939	1.139
High	Master Protein	Q8BJL0	SWI/SNF-related matrix-associated actin-dependent regulator of chromatin subfamily A-like protein 1 OS=Mus musculus GN=Smarcal1 PE=1 SV=1	0	16	9	42	9	910	100.8	628	42	9	0	1.094	0.967506	0.79	1.094	1.1	0.907
High	Master Protein	P70168	Importin subunit beta-1 OS=Mus musculus GN=Kpnb1 PE=1 SV=2	0	45	29	332	29	876	97.1	5960	332	29	0	1.077	0.929069	2.31	1.094	0.966	1.077
High	Master Protein	Q60605	Myosin light polypeptide 6 OS=Mus musculus GN=Myl6 PE=1 SV=3	0	83	12	171	11	151	16.9	4645	171	12	1	1.094	0.894632	0.12	1.094	1.095	1.055
High	Master Protein	Q9JLJ2	4-trimethylaminobutyraldehyde dehydrogenase OS=Mus musculus GN=Aldh9a1 PE=1 SV=1	0	41	14	100	14	494	53.5	1866	100	14	0	1.094	0.976363	18.92	1.094	0.77	1.233
High	Master Protein	Q91Z50	Flap endonuclease 1 OS=Mus musculus GN=Fen1 PE=1 SV=1	0	37	9	79	9	380	42.6	1628	79	9	0	1.046	0.996172	6.85	1.094	1.046	0.644
High	Master Protein	D3YZZ5	Transmembrane p24-trafficking protein 7 OS=Mus musculus GN=Tmed7 PE=1 SV=1	0	53	9	166	9	224	25.2	3802	166	9	0	1.094	0.955872	10.19	1.094	1.013	1.169
High	Master Protein	Q8CFS6	Potassium voltage-gated channel subfamily V member 2 OS=Mus musculus GN=Kcnv2 PE=2 SV=1	0	20	10	41	10	562	64.4	1092	41	10	0	0.876	0.661172	4.32	1.094	0.876	0.851
High	Master Protein	Q9CQ65	S-methyl-5'-thioadenosine phosphorylase OS=Mus musculus GN=Mtap PE=1 SV=1	0	30	5	29	5	283	31	363	29	5	0	0.992	0.9873	5.31	1.094	0.958	0.992
High	Master Protein	Q923D5	WW domain-binding protein 11 OS=Mus musculus GN=Wbp11 PE=1 SV=2	0	25	12	78	12	641	69.8	1194	78	12	0	1.093	0.981584	16.92	1.093	1.434	0.969
High	Master Protein	E9PUU4	Gem-associated protein 5 OS=Mus musculus GN=Gemin5 PE=1 SV=1	0	10	10	39	10	1503	166.6	289	39	10	0	1.093	0.981614	12.9	1.093	0.998	1.314
High	Master Protein	P97822	Acidic leucine-rich nuclear phosphoprotein 32 family member E OS=Mus musculus GN=Anp32e PE=1 SV=2	0	43	8	1252	8	260	29.6	53558	1252	8	0	1.031	0.985123	8.95	1.093	0.948	1.031
High	Master Protein	Q9WV54	Acid ceramidase OS=Mus musculus GN=Asah1 PE=1 SV=1	0	38	12	128	12	394	44.6	2206	128	12	0	0.914	0.805508	24.33	1.093	0.914	0.781
High	Master Protein	S4R2T7	Ankyrin-2 (Fragment) OS=Mus musculus GN=Ank2 PE=1 SV=2	0	63	55	959	7	1219	131.1	24187	959	55	1	0.979	0.966747	0.52	1.093	0.975	0.979
High	Master Protein	Q6GQU6	Leucine-rich repeat and immunoglobulin-like domain-containing nogo receptor-interacting protein 3 OS=Mus musculus GN=Lingo3 PE=2 SV=2	0	24	6	12	6	589	64.6	248	12	6	0	1.093	0.981178	10.24	1.093	1.018	1.205
High	Master Protein	P49312	Heterogeneous nuclear ribonucleoprotein A1 OS=Mus musculus GN=Hnrnpa1 PE=1 SV=2	0	75	22	1694	19	320	34.2	26758	1694	22	0	1.081	0.90094	1.65	1.093	1.081	0.991
High	Master Protein	A2AT93	Phospholipase C, beta 4 (Fragment) OS=Mus musculus GN=Plcb4 PE=1 SV=1	0	40	8	25	1	255	29.4	423	25	8	0	1.093	0.993902	4.72	1.093	1.127	0.954
High	Master Protein	O35344	Importin subunit alpha-4 OS=Mus musculus GN=Kpna3 PE=1 SV=1	0	45	13	159	9	521	57.7	1186	159	13	4	1.03	0.993902	8.75	1.093	0.969	1.03
High	Master Protein	Q8K070	Sterile alpha motif domain-containing protein 14 OS=Mus musculus GN=Samd14 PE=1 SV=1	0	19	5	20	5	417	45.1	349	20	5	0	0.961	0.984735	1.08	1.092	0.954	0.961
High	Master Protein	Q8K199	COX assembly mitochondrial protein 2 homolog OS=Mus musculus GN=Cmc2 PE=3 SV=1	0	44	3	38	3	79	9.4	95	38	3	0	1.092	0.993902	45.75	1.092	0.556	1.43
High	Master Protein	Q9JM96	Cdc42 effector protein 4 OS=Mus musculus GN=Cdc42ep4 PE=1 SV=1	0	52	11	66	11	349	37.8	1466	66	11	0	1.092	0.976363	3.06	1.092	1.115	1.028
High	Master Protein	P97379	Ras GTPase-activating protein-binding protein 2 OS=Mus musculus GN=G3bp2 PE=1 SV=2	0	55	20	291	20	482	54.1	2381	291	20	0	1.092	0.894632	7.05	1.092	1.208	1.04
High	Master Protein	A0A0G2JF44	Intraflagellar transport protein 22 homolog (Fragment) OS=Mus musculus GN=Ift22 PE=1 SV=1	0	24	2	15	2	155	17.5	272	15	2	0	0.848	0.679914	24.9	1.092	0.848	0.726
High	Master Protein	A0A0G2JEC8	Protein ABHD4 (Fragment) OS=Mus musculus GN=Abhd4 PE=1 SV=1	0.002	7	2	4	2	189	21.1	59	4	2	0	1.37	0.881364	30.12	1.092	1.664	1.37
High	Master Protein	Q9Z2X1	Heterogeneous nuclear ribonucleoprotein F OS=Mus musculus GN=Hnrnpf PE=1 SV=3	0	67	22	724	19	415	45.7	18555	724	22	0	1.053	0.964967	5.46	1.092	1.053	1.007
High	Master Protein	Q9QZE7	Translin-associated protein X OS=Mus musculus GN=Tsnax PE=1 SV=1	0	62	14	219	14	290	32.9	7621	219	14	0	1.092	0.982703	7.53	1.092	1.036	1.193
High	Master Protein	Q9D2V7	Coronin-7 OS=Mus musculus GN=Coro7 PE=1 SV=2	0	16	7	12	7	922	100.7	93	12	7	0	1.091	0.983634	7.23	1.091	1.038	1.576
High	Master Protein	Q64514	Tripeptidyl-peptidase 2 OS=Mus musculus GN=Tpp2 PE=1 SV=3	0	26	22	88	22	1262	139.8	1338	88	22	0	1.091	0.984017	3.04	1.091	0.877	1.114
High	Master Protein	Q923D4	Splicing factor 3B subunit 5 OS=Mus musculus GN=Sf3b5 PE=1 SV=1	0	87	7	186	7	86	10.1	3324	186	7	0	1.077	0.984735	1.89	1.091	1.077	0.838
High	Master Protein	P63038	60 kDa heat shock protein, mitochondrial OS=Mus musculus GN=Hspd1 PE=1 SV=1	0	79	39	982	39	573	60.9	28493	982	39	0	1.091	0.878207	7.66	1.091	1.035	1.381
High	Master Protein	Q08EB5	CLIP-associating protein 2 OS=Mus musculus GN=Clasp2 PE=1 SV=1	0	52	49	277	2	1304	142.4	4906	277	49	48	1.025	0.993902	0.89	1.091	1.018	1.025
High	Master Protein	Q501J6	Probable ATP-dependent RNA helicase DDX17 OS=Mus musculus GN=Ddx17 PE=1 SV=1	0	49	36	436	25	650	72.4	9136	436	36	0	1.044	0.976363	6.7	1.091	1.044	0.9
High	Master Protein	Q8BI72	CDKN2A-interacting protein OS=Mus musculus GN=Cdkn2aip PE=1 SV=1	0	48	17	160	17	563	59.7	3809	160	17	0	1.063	0.992827	3.83	1.091	1.063	0.78
High	Master Protein	Q3UFY7	7-methylguanosine phosphate-specific 5'-nucleotidase OS=Mus musculus GN=Nt5c3b PE=1 SV=3	0	23	5	18	5	300	34.4	91	18	5	0	1.242	0.779196	18.1	1.091	2.002	1.242
High	Master Protein	Q02053	Ubiquitin-like modifier-activating enzyme 1 OS=Mus musculus GN=Uba1 PE=1 SV=1	0	63	48	1098	38	1058	117.7	24620	1098	48	10	1.091	0.879381	14.81	1.091	0.982	1.229
High	Master Protein	Q6ZWV3	60S ribosomal protein L10 OS=Mus musculus GN=Rpl10 PE=1 SV=3	0	61	13	322	13	214	24.6	4823	322	13	0	1.095	0.894632	0.57	1.09	1.129	1.095
High	Master Protein	P51448	Nuclear receptor ROR-alpha OS=Mus musculus GN=Rora PE=1 SV=1	0	17	8	30	6	523	58.8	143	30	8	0	1.09	0.984017	29.89	1.09	1.31	0.866
High	Master Protein	Q99KV1	DnaJ homolog subfamily B member 11 OS=Mus musculus GN=Dnajb11 PE=1 SV=1	0	44	12	118	12	358	40.5	1419	118	12	0	1.09	0.976363	3.91	1.09	1.148	1.061
High	Master Protein	Q9ESJ4	NCK-interacting protein with SH3 domain OS=Mus musculus GN=Nckipsd PE=1 SV=2	0	16	8	37	7	714	78.5	497	37	8	1	1.108	0.975388	2.48	1.09	1.108	1.516
High	Master Protein	P84089	Enhancer of rudimentary homolog OS=Mus musculus GN=Erh PE=1 SV=1	0	56	6	172	6	104	12.3	6429	172	6	0	0.986	0.985275	0.45	1.09	0.986	0.983
High	Master Protein	Q8C788	Sorting nexin OS=Mus musculus GN=Snx18 PE=1 SV=1	0	7	3	23	3	615	67.7	269	23	3	0	1.09	0.984017	1.5	1.09	1.101	1.029
High	Master Protein	Q91XU3	Phosphatidylinositol 5-phosphate 4-kinase type-2 gamma OS=Mus musculus GN=Pip4k2c PE=1 SV=1	0	36	12	110	12	421	47.3	2221	110	12	0	1.064	0.984017	3.59	1.09	1.064	0.865
High	Master Protein	Q66GT5	Phosphatidylglycerophosphatase and protein-tyrosine phosphatase 1 OS=Mus musculus GN=Ptpmt1 PE=1 SV=1	0	28	5	42	5	193	21.9	304	42	5	0	1.182	0.789821	11.66	1.09	1.479	1.182
High	Master Protein	Q7M6Y3	Phosphatidylinositol-binding clathrin assembly protein OS=Mus musculus GN=Picalm PE=1 SV=1	0	37	16	106	6	660	71.5	1957	106	16	8	1.145	0.895383	7.14	1.09	1.145	1.499
High	Master Protein	Q9CQA3	Succinate dehydrogenase [ubiquinone] iron-sulfur subunit, mitochondrial OS=Mus musculus GN=Sdhb PE=1 SV=1	0	54	15	168	15	282	31.8	5163	168	15	0	1.042	0.979115	6.72	1.089	1.042	0.992
High	Master Protein	Q5SUC9	Protein SCO1 homolog, mitochondrial OS=Mus musculus GN=Sco1 PE=1 SV=1	0	12	2	10	2	284	31.6	217	10	2	0	1.089	0.997037	1.21	1.089	1.08	1.272
High	Master Protein	A0A087WNV1	Arf-GAP domain and FG repeat-containing protein 1 OS=Mus musculus GN=Agfg1 PE=1 SV=1	0	25	9	91	8	521	53.9	1935	91	9	1	1.089	0.982867	6.51	1.089	0.939	1.137
High	Master Protein	Q91W86	Vacuolar protein sorting-associated protein 11 homolog OS=Mus musculus GN=Vps11 PE=1 SV=3	0	28	19	93	19	941	107.7	921	93	19	0	1.089	0.975388	10.37	1.089	1.013	1.203
High	Master Protein	Q62420	Endophilin-A1 OS=Mus musculus GN=Sh3gl2 PE=1 SV=2	0	50	15	308	10	352	39.9	8981	308	15	5	0.999	0.999996	12.29	1.089	0.999	0.851
High	Master Protein	Q922J3	CAP-Gly domain-containing linker protein 1 OS=Mus musculus GN=Clip1 PE=1 SV=1	0	18	18	59	15	1391	155.7	801	59	18	3	1.089	0.967947	16.78	1.089	0.966	1.288
High	Master Protein	A0A023T778	Mago nashi protein OS=Mus musculus GN=Magohb PE=1 SV=1	0	76	12	208	1	148	17.3	2260	208	12	11	0.907	0.726046	20.26	1.089	0.907	0.798
High	Master Protein	Q8R164	Valacyclovir hydrolase OS=Mus musculus GN=Bphl PE=1 SV=1	0	40	9	168	9	291	32.8	2147	168	9	0	1.111	0.967517	3.03	1.089	1.111	1.338
High	Master Protein	Q9CZ44	NSFL1 cofactor p47 OS=Mus musculus GN=Nsfl1c PE=1 SV=1	0	55	16	130	16	370	40.7	3400	130	16	0	1.089	0.984017	18.14	1.089	0.955	1.222
High	Master Protein	Q3UMU9	Hepatoma-derived growth factor-related protein 2 OS=Mus musculus GN=Hdgfl2 PE=1 SV=1	0	21	13	449	11	669	74.2	13957	449	13	2	0.936	0.819442	9.17	1.089	0.936	0.882
High	Master Protein	Q9QUI0	Transforming protein RhoA OS=Mus musculus GN=Rhoa PE=1 SV=1	0	84	15	382	7	193	21.8	4910	382	15	9	1.088	0.885901	1.02	1.088	1.138	1.081
High	Master Protein	Q8BYI8	Protein FAM234B OS=Mus musculus GN=Fam234b PE=1 SV=1	0	9	4	20	4	624	67	348	20	4	0	1.088	0.984017	1.32	1.088	0.915	1.098
High	Master Protein	O55013	Trafficking protein particle complex subunit 3 OS=Mus musculus GN=Trappc3 PE=1 SV=1	0	22	5	23	5	180	20.3	274	23	5	0	1.001	0.984017	12.87	1.088	1.001	0.907
High	Master Protein	Q80ZF8	Adhesion G protein-coupled receptor B3 OS=Mus musculus GN=Adgrb3 PE=1 SV=2	0	7	7	26	7	1522	171.2	548	26	7	0	0.991	0.985275	13.2	1.088	0.991	0.862
High	Master Protein	P55200	Histone-lysine N-methyltransferase 2A OS=Mus musculus GN=Kmt2a PE=1 SV=3	0	8	18	71	18	3966	429.4	837	71	18	0	0.951	0.923075	7.86	1.088	0.951	0.903
High	Master Protein	Q9JJY3	Sphingomyelin phosphodiesterase 3 OS=Mus musculus GN=Smpd3 PE=1 SV=1	0	13	5	19	5	655	71.2	327	19	5	0	0.957	0.960209	12.85	1.088	0.88	0.957
High	Master Protein	P62855	40S ribosomal protein S26 OS=Mus musculus GN=Rps26 PE=1 SV=3	0	44	4	201	4	115	13	5758	201	4	0	1.088	0.956465	1.19	1.088	0.996	1.097
High	Master Protein	Q9JKF6	Nectin-1 OS=Mus musculus GN=Nectin1 PE=1 SV=3	0	43	14	170	14	515	57	2912	170	14	0	0.979	0.94662	14.89	1.088	0.873	0.979
High	Master Protein	D3YXK2	Scaffold attachment factor B1 OS=Mus musculus GN=Safb PE=1 SV=2	0	39	33	481	27	937	105	8865	481	33	6	1.03	0.985055	8.12	1.088	1.03	0.974
High	Master Protein	Q61937	Nucleophosmin OS=Mus musculus GN=Npm1 PE=1 SV=1	0	60	17	366	17	292	32.5	10848	366	17	0	1.031	0.984735	8.15	1.088	1.031	0.949
High	Master Protein	Q9QZF2	Glypican-1 OS=Mus musculus GN=Gpc1 PE=1 SV=1	0	9	3	7	3	557	61.3	71	7	3	0	1.151	0.95823	2.69	1.088	1.171	1.151
High	Master Protein	Q8BWY3	Eukaryotic peptide chain release factor subunit 1 OS=Mus musculus GN=Etf1 PE=1 SV=4	0	16	5	25	5	437	49	316	25	5	0	1.432	0.141534	20.72	1.088	1.432	1.632
High	Master Protein	Q9DC16	Endoplasmic reticulum-Golgi intermediate compartment protein 1 OS=Mus musculus GN=Ergic1 PE=1 SV=1	0	43	11	95	11	290	32.5	1378	95	11	0	0.908	0.765937	2.09	1.088	0.908	0.895
High	Master Protein	Q6ZWU9	40S ribosomal protein S27 OS=Mus musculus GN=Rps27 PE=1 SV=3	0	42	4	71	1	84	9.5	909	71	4	4	1.087	0.977686	1.18	1.087	1.096	1.068
High	Master Protein	Q91ZV8	Adhesion G protein-coupled receptor A2 OS=Mus musculus GN=Adgra2 PE=1 SV=2	0	6	4	37	4	1336	143.1	106	37	4	0	0.948	0.977067	8.96	1.087	0.948	0.894
High	Master Protein	Q69Z26	Contactin-4 OS=Mus musculus GN=Cntn4 PE=1 SV=2	0	11	7	14	7	1026	113.4	152	14	7	0	1.186	0.820852	12.32	1.087	1.186	1.414
High	Master Protein	E9QAH1	Golgi autoantigen, golgin subfamily b, macrogolgin 1 OS=Mus musculus GN=Golgb1 PE=1 SV=1	0	20	44	193	44	3197	365.1	2482	193	44	0	1.087	0.98708	2.55	1.087	1.068	1.153
High	Master Protein	E9PZ12	Membrane-associated guanylate kinase, WW and PDZ domain-containing protein 1 OS=Mus musculus GN=Magi1 PE=1 SV=1	0	15	9	38	9	1255	138.3	488	38	9	0	1.087	0.976363	14.77	1.087	0.978	1.276
High	Master Protein	Q9CYA0	Cysteine-rich with EGF-like domain protein 2 OS=Mus musculus GN=Creld2 PE=1 SV=1	0	11	3	56	3	350	38.2	1055	56	3	0	1.086	0.977408	37.77	1.086	0.81	1.744
High	Master Protein	A2A848	Peroxisomal acyl-coenzyme A oxidase 1 (Fragment) OS=Mus musculus GN=Acox1 PE=1 SV=1	0	31	13	58	2	625	70	499	58	13	0	1.219	0.934842	16.15	1.086	1.219	1.713
High	Master Protein	Q99KY4	Cyclin-G-associated kinase OS=Mus musculus GN=Gak PE=1 SV=2	0	20	23	82	20	1305	143.6	926	82	23	0	1.086	0.975388	8.25	1.086	1.147	0.944
High	Master Protein	P48678	Prelamin-A/C OS=Mus musculus GN=Lmna PE=1 SV=2	0	67	43	802	42	665	74.2	13556	802	43	0	1.209	0.384046	7.87	1.086	1.273	1.209
High	Master Protein	Q8C7M3	E3 ubiquitin-protein ligase TRIM9 OS=Mus musculus GN=Trim9 PE=1 SV=2	0	22	12	67	11	817	90.8	692	67	12	1	1.083	0.977276	0.46	1.086	0.948	1.083
High	Master Protein	Q6P1H6	Ankyrin repeat and LEM domain-containing protein 2 OS=Mus musculus GN=Ankle2 PE=1 SV=2	0	11	6	21	6	964	106.1	217	21	6	0	1.086	0.984558	20.2	1.086	0.938	1.485
High	Master Protein	Q9CQD1	Ras-related protein Rab-5A OS=Mus musculus GN=Rab5a PE=1 SV=1	0	76	11	259	7	215	23.6	4445	259	11	0	0.911	0.745458	11.95	1.086	0.843	0.911
High	Master Protein	Q69ZW3	EH domain-binding protein 1 OS=Mus musculus GN=Ehbp1 PE=1 SV=3	0	10	8	34	8	1231	139	216	34	8	0	0.809	0.789296	29.05	1.086	0.809	0.676
High	Master Protein	P61202	COP9 signalosome complex subunit 2 OS=Mus musculus GN=Cops2 PE=1 SV=1	0	43	20	236	20	443	51.6	4145	236	20	0	1.086	0.955139	0.92	1.086	1.092	1.072
High	Master Protein	Q8BX10	Serine/threonine-protein phosphatase PGAM5, mitochondrial OS=Mus musculus GN=Pgam5 PE=1 SV=1	0	42	9	81	9	288	32	918	81	9	0	1.086	0.9873	0.5	1.086	1.011	1.089
High	Master Protein	Q9DCJ1	Target of rapamycin complex subunit LST8 OS=Mus musculus GN=Mlst8 PE=1 SV=1	0	31	5	28	5	326	35.8	356	28	5	0	1.018	0.999849	9.82	1.086	0.881	1.018
High	Master Protein	P62754	40S ribosomal protein S6 OS=Mus musculus GN=Rps6 PE=1 SV=1	0	36	9	190	9	249	28.7	4679	190	9	0	1.085	0.923075	1.47	1.085	1.075	1.117
High	Master Protein	Q569Z6	Thyroid hormone receptor-associated protein 3 OS=Mus musculus GN=Thrap3 PE=1 SV=1	0	29	26	434	21	951	108.1	8465	434	26	5	1.085	0.894632	6.09	1.085	1.129	0.839
High	Master Protein	O35226	26S proteasome non-ATPase regulatory subunit 4 OS=Mus musculus GN=Psmd4 PE=1 SV=1	0	29	9	46	7	376	40.7	1338	46	9	3	1.116	0.938308	3.4	1.085	1.141	1.116
High	Master Protein	Q68FF6	ARF GTPase-activating protein GIT1 OS=Mus musculus GN=Git1 PE=1 SV=1	0	28	13	71	12	770	85.2	1345	71	13	1	1.04	0.996988	6.42	1.085	0.98	1.04
High	Master Protein	G5E8R4	SAPS domain family, member 3, isoform CRA_c OS=Mus musculus GN=Ppp6r3 PE=1 SV=1	0	24	15	124	15	873	97.8	1248	124	15	0	1.149	0.896594	3.81	1.085	1.179	1.149
High	Master Protein	Q8QZY9	Splicing factor 3B subunit 4 OS=Mus musculus GN=Sf3b4 PE=1 SV=1	0	23	6	143	6	424	44.3	2065	143	6	0	1.085	0.984558	4.26	1.085	1.116	1.018
High	Master Protein	P42932	T-complex protein 1 subunit theta OS=Mus musculus GN=Cct8 PE=1 SV=3	0	65	34	427	34	548	59.5	13474	427	34	0	1.037	0.98287	5	1.084	1.002	1.037
High	Master Protein	Q3V009	Transmembrane emp24 domain-containing protein 1 OS=Mus musculus GN=Tmed1 PE=1 SV=1	0	7	1	8	1	227	25.2	399	8	1	0	0.982	0.984017	13.97	1.084	0.728	0.982
High	Master Protein	Q99L43	Phosphatidate cytidylyltransferase 2 OS=Mus musculus GN=Cds2 PE=1 SV=1	0	24	7	287	6	444	51.3	6085	287	7	0	1.049	0.99427	5.03	1.084	0.937	1.049
High	Master Protein	P20029	78 kDa glucose-regulated protein OS=Mus musculus GN=Hspa5 PE=1 SV=3	0	64	37	1057	34	655	72.4	30990	1057	37	0	1.078	0.913014	0.91	1.084	0.952	1.078
High	Master Protein	Q564G0	Guanylate kinase OS=Mus musculus GN=Guk1 PE=1 SV=1	0	72	14	325	1	219	24	7424	325	14	14	1.084	0.913014	0.63	1.084	1.08	1.434
High	Master Protein	Q9CQE8	UPF0568 protein C14orf166 homolog OS=Mus musculus PE=1 SV=1	0	74	17	338	17	244	28.1	7785	338	17	0	1.084	0.895176	13.21	1.084	1.219	0.988
High	Master Protein	G5E8Y0	Sodium/calcium exchanger 1 OS=Mus musculus GN=Slc8a1 PE=1 SV=2	0	19	14	131	14	970	107.9	1254	131	14	0	1.026	0.989059	6.95	1.084	0.978	1.026
High	Master Protein	A0A087WQG6	Regulator of G-protein-signaling 6 OS=Mus musculus GN=Rgs6 PE=1 SV=2	0	48	15	117	12	465	53.8	1763	117	15	3	1.024	0.993902	8.7	1.084	1.024	0.962
High	Master Protein	Q9WUP7	Ubiquitin carboxyl-terminal hydrolase isozyme L5 OS=Mus musculus GN=Uchl5 PE=1 SV=2	0	51	12	69	12	329	37.6	817	69	12	0	1.182	0.850287	2.21	1.084	1.182	1.2
High	Master Protein	Q8R326	Paraspeckle component 1 OS=Mus musculus GN=Pspc1 PE=1 SV=1	0	38	18	222	18	523	58.7	3761	222	18	0	1.084	0.975388	11.95	1.084	1.171	0.961
High	Master Protein	Q9CW46	Ribonucleoprotein PTB-binding 1 OS=Mus musculus GN=Raver1 PE=1 SV=2	0	28	11	54	11	748	79.3	305	54	11	0	0.921	0.894632	13.6	1.084	0.921	0.844
High	Master Protein	O35382	Exocyst complex component 4 OS=Mus musculus GN=Exoc4 PE=1 SV=2	0	23	15	85	15	975	110.5	2009	85	15	0	1.069	0.985275	1.02	1.084	1.061	1.069
High	Master Protein	Q3U3Q1	Serine/threonine-protein kinase ULK3 OS=Mus musculus GN=Ulk3 PE=2 SV=1	0	17	5	27	5	472	53.5	290	27	5	0	1.064	0.990285	2.71	1.084	1.03	1.064
High	Master Protein	P17426	AP-2 complex subunit alpha-1 OS=Mus musculus GN=Ap2a1 PE=1 SV=1	0	65	52	721	40	977	107.6	19535	721	52	13	0.998	0.999902	0.56	1.084	0.998	0.994
High	Master Protein	Q9JJV2	Profilin-2 OS=Mus musculus GN=Pfn2 PE=1 SV=3	0	62	7	176	7	140	15	4943	176	7	0	1.083	0.966059	32.61	1.083	0.845	1.337
High	Master Protein	Q9Z1Q9	Valine--tRNA ligase OS=Mus musculus GN=Vars PE=1 SV=1	0	45	41	306	41	1263	140.1	4123	306	41	0	1.031	0.990989	6.94	1.083	0.983	1.031
High	Master Protein	Q4KMM3	Oxidation resistance protein 1 OS=Mus musculus GN=Oxr1 PE=1 SV=3	0	45	28	242	28	866	95.9	5644	242	28	0	1.083	0.958114	4.43	1.083	0.922	1.115
High	Master Protein	P84091	AP-2 complex subunit mu OS=Mus musculus GN=Ap2m1 PE=1 SV=1	0	66	30	418	30	435	49.6	8421	418	30	0	0.961	0.975332	0.24	1.083	0.961	0.959
High	Master Protein	Q99JP7	Gamma-glutamyltransferase 7 OS=Mus musculus GN=Ggt7 PE=1 SV=2	0	36	13	70	13	662	70.2	958	70	13	0	0.945	0.924137	18.8	1.083	0.945	0.689
High	Master Protein	E9Q7K1	Guanylate kinase OS=Mus musculus GN=Guk1 PE=1 SV=1	0	78	14	335	1	207	22.8	7519	335	14	0	1.083	0.984735	24.45	1.083	1.294	0.904
High	Master Protein	P00920	Carbonic anhydrase 2 OS=Mus musculus GN=Ca2 PE=1 SV=4	0	77	17	1162	17	260	29	24334	1162	17	0	1.194	0.446496	13.77	1.083	1.194	1.481
High	Master Protein	P61759	Prefoldin subunit 3 OS=Mus musculus GN=Vbp1 PE=1 SV=2	0	30	6	57	6	196	22.4	934	57	6	0	1.083	0.976363	4.17	1.083	0.893	1.113
High	Master Protein	A0A0N4SVQ6	Endoplasmic reticulum-Golgi intermediate compartment protein 2 (Fragment) OS=Mus musculus GN=Ergic2 PE=1 SV=1	0	22	3	9	3	198	22.1	130	9	3	0	1.059	0.993902	3.36	1.083	0.945	1.059
High	Master Protein	E9QPY6	DNA mismatch repair protein Msh3 OS=Mus musculus GN=Msh3 PE=1 SV=2	0	9	7	24	7	1094	123.2	244	24	7	0	1.083	0.985275	8.67	1.083	1.146	0.849
High	Master Protein	Q6DFW4	Nucleolar protein 58 OS=Mus musculus GN=Nop58 PE=1 SV=1	0	42	17	181	17	536	60.3	4173	181	17	0	1.066	0.993902	2.31	1.083	1.041	1.066
High	Master Protein	P12023	Amyloid beta A4 protein OS=Mus musculus GN=App PE=1 SV=3	0	10	6	61	6	770	86.7	646	61	6	0	1.083	0.978708	3.67	1.083	0.991	1.109
High	Master Protein	Q6ZQH8	Nucleoporin NUP188 homolog OS=Mus musculus GN=Nup188 PE=1 SV=2	0	13	16	52	16	1759	196.6	821	52	16	0	1.082	0.982703	1.42	1.082	1.093	1.031
High	Master Protein	F6W7I2	Deoxyhypusine synthase (Fragment) OS=Mus musculus GN=Dhps PE=1 SV=1	0	21	2	5	2	149	16.3	115	5	2	0	1.082	0.988622	25.92	1.082	0.893	1.625
High	Master Protein	Q9WTU6	Mitogen-activated protein kinase 9 OS=Mus musculus GN=Mapk9 PE=1 SV=2	0	29	10	51	4	423	48.2	345	51	10	0	1.082	0.985275	6.75	1.082	1.033	1.201
High	Master Protein	Q9CWZ3	RNA-binding protein 8A OS=Mus musculus GN=Rbm8a PE=1 SV=4	0	78	10	202	10	174	19.9	3768	202	10	0	1.066	0.985595	2.27	1.082	1.066	0.988
High	Master Protein	Q8BNU0	Armadillo repeat-containing protein 6 OS=Mus musculus GN=Armc6 PE=1 SV=1	0	12	4	19	4	468	50.7	334	19	4	0	0.946	0.937338	4.94	1.082	0.946	0.915
High	Master Protein	P26645	Myristoylated alanine-rich C-kinase substrate OS=Mus musculus GN=Marcks PE=1 SV=2	0	70	14	750	14	309	29.6	27359	750	14	0	0.964	0.976363	0.4	1.082	0.964	0.962
High	Master Protein	P63015	Paired box protein Pax-6 OS=Mus musculus GN=Pax6 PE=1 SV=1	0	16	4	24	4	422	46.7	116	24	4	0	1.088	0.984017	0.8	1.082	1.323	1.088
High	Master Protein	Q9CQB4	Cytochrome b-c1 complex subunit 7 OS=Mus musculus GN=Uqcrb PE=1 SV=1	0	59	7	287	7	111	13.6	2240	287	7	0	1.082	0.894632	34.62	1.082	1.6	0.829
High	Master Protein	E9PWL1	Voltage-dependent T-type calcium channel subunit alpha OS=Mus musculus GN=Cacna1g PE=1 SV=1	0	2	2	5	2	2272	251.3	157	5	2	0	1.082	0.99873	24.34	1.082	0.703	1.259
High	Master Protein	Q8K4Z5	Splicing factor 3A subunit 1 OS=Mus musculus GN=Sf3a1 PE=1 SV=1	0	47	28	287	28	791	88.5	4724	287	28	0	1.027	0.999996	7.9	1.082	1.027	0.913
High	Master Protein	E9Q6J5	Biorientation of chromosomes in cell division protein 1-like 1 OS=Mus musculus GN=Bod1l PE=1 SV=1	0	9	16	60	16	3032	327.3	700	60	16	0	0.98	0.976653	13.84	1.081	0.98	0.847
High	Master Protein	P40142	Transketolase OS=Mus musculus GN=Tkt PE=1 SV=1	0	80	43	2192	42	623	67.6	51105	2192	43	1	1.23	0.304536	9.02	1.081	1.23	1.304
High	Master Protein	E9PUQ5	Golgin subfamily A member 2 OS=Mus musculus GN=Golga2 PE=1 SV=1	0	28	20	65	20	1026	116.2	1611	65	20	0	1.028	0.988622	7.63	1.081	0.934	1.028
High	Master Protein	D3YZU4	SH3 and multiple ankyrin repeat domains protein 1 OS=Mus musculus GN=Shank1 PE=1 SV=1	0	6	7	53	7	2159	225.2	474	53	7	0	1.007	0.993902	9.02	1.081	0.945	1.007
High	Master Protein	P14115	60S ribosomal protein L27a OS=Mus musculus GN=Rpl27a PE=1 SV=5	0	39	6	159	6	148	16.6	2889	159	6	0	1.08	0.923745	6.1	1.08	1.036	1.24
High	Master Protein	Q99LR1	Monoacylglycerol lipase ABHD12 OS=Mus musculus GN=Abhd12 PE=1 SV=2	0	51	15	229	15	398	45.2	3890	229	15	0	1.08	0.976363	14.86	1.08	1.234	0.972
High	Master Protein	Q8CH02	SURP and G-patch domain-containing protein 1 OS=Mus musculus GN=Sugp1 PE=1 SV=1	0	8	4	30	4	643	72.6	392	30	4	0	1.08	0.984017	9.92	1.08	1.152	0.864
High	Master Protein	P62242	40S ribosomal protein S8 OS=Mus musculus GN=Rps8 PE=1 SV=2	0	60	16	212	16	208	24.2	4993	212	16	0	1.08	0.902787	9.6	1.08	1.219	1.01
High	Master Protein	A0A0R4J102	Cytoplasmic polyadenylation element-binding protein 3 OS=Mus musculus GN=Cpeb3 PE=1 SV=1	0	16	7	38	4	716	78.3	214	38	7	3	1.08	0.984017	12.79	1.08	0.987	1.307
High	Master Protein	O08749	Dihydrolipoyl dehydrogenase, mitochondrial OS=Mus musculus GN=Dld PE=1 SV=2	0	67	24	659	24	509	54.2	15716	659	24	0	1.08	0.903185	7.06	1.08	1.138	1.029
High	Master Protein	E9Q453	Tropomyosin alpha-1 chain OS=Mus musculus GN=Tpm1 PE=1 SV=1	0	52	15	151	3	245	28.5	2645	151	15	12	1.08	0.955139	4.44	1.08	1.191	1.048
High	Master Protein	A0A0R4J0B4	Cytidine monophospho-N-acetylneuraminic acid synthetase OS=Mus musculus GN=Cmas PE=1 SV=1	0	68	24	409	24	432	48	9203	409	24	0	1.08	0.923745	14.79	1.08	1.187	0.825
High	Master Protein	Q3TQC7	Ectonucleoside triphosphate diphosphohydrolase 5 OS=Mus musculus GN=Entpd5 PE=1 SV=1	0	19	6	21	6	452	49.8	547	21	6	0	1.08	0.98287	7.28	1.08	1.026	1.488
High	Master Protein	O55131	Septin-7 OS=Mus musculus GN=Sept7 PE=1 SV=1	0	55	21	656	1	436	50.5	15701	656	21	19	1.079	0.905853	6.17	1.079	1.034	1.124
High	Master Protein	Q8CJG1	Protein argonaute-1 OS=Mus musculus GN=Ago1 PE=1 SV=2	0	45	26	131	14	857	97.2	1623	131	26	6	1.079	0.993902	7.48	1.079	1.134	0.956
High	Master Protein	Q9JIY2	E3 ubiquitin-protein ligase Hakai OS=Mus musculus GN=Cbll1 PE=1 SV=1	0	15	5	8	5	491	54.4	59	8	5	0	0.941	0.984735	13.21	1.079	0.941	0.864
High	Master Protein	Q9QUM9	Proteasome subunit alpha type-6 OS=Mus musculus GN=Psma6 PE=1 SV=1	0	68	13	142	13	246	27.4	3779	142	13	0	1.079	0.976363	29.65	1.079	0.863	1.32
High	Master Protein	J3QK13	Serine/threonine-protein phosphatase 6 regulatory ankyrin repeat subunit B (Fragment) OS=Mus musculus GN=Ankrd44 PE=1 SV=1	0	9	5	18	5	789	85.1	280	18	5	0	1.072	0.993977	1.01	1.079	0.87	1.072
High	Master Protein	B7ZCJ1	Rho GTPase-activating protein 21 OS=Mus musculus GN=Arhgap21 PE=1 SV=1	0	7	9	31	9	1955	216.8	388	31	9	0	1.079	0.985166	17.95	1.079	0.893	1.21
High	Master Protein	Q9Z1B3	1-phosphatidylinositol 4,5-bisphosphate phosphodiesterase beta-1 OS=Mus musculus GN=Plcb1 PE=1 SV=2	0	14	11	26	11	1216	138.3	426	26	11	0	1.079	0.9873	18.99	1.079	0.817	1.217
High	Master Protein	D3YXD1	Ubiquitin-conjugating enzyme E2 E2 (Fragment) OS=Mus musculus GN=Ube2e2 PE=1 SV=2	0	29	4	20	4	181	19.8	314	20	4	0	1.03	0.999996	7	1.079	1.03	0.939
High	Master Protein	Q63829	COMM domain-containing protein 3 OS=Mus musculus GN=Commd3 PE=1 SV=1	0	40	6	21	6	195	22	217	21	6	0	1.284	0.640697	8.23	1.079	1.284	1.356
High	Master Protein	H3BJU7	Rho guanine nucleotide exchange factor 2 OS=Mus musculus GN=Arhgef2 PE=1 SV=1	0	22	15	60	15	956	108.5	947	60	15	0	1.079	0.984017	6.59	1.079	1.127	0.729
High	Master Protein	P62631	Elongation factor 1-alpha 2 OS=Mus musculus GN=Eef1a2 PE=1 SV=1	0	70	21	1606	10	463	50.4	33070	1606	21	0	1.033	0.984017	6.55	1.079	1.033	0.947
High	Master Protein	Q8BIE6	FERM domain-containing protein 4A OS=Mus musculus GN=Frmd4a PE=1 SV=2	0	12	7	23	6	1020	113.8	615	23	7	1	1.078	0.985166	3.64	1.078	1.052	1.325
High	Master Protein	P97355	Spermine synthase OS=Mus musculus GN=Sms PE=1 SV=1	0	51	13	100	13	366	41.3	1627	100	13	0	1.078	0.988622	30.4	1.078	0.857	1.405
High	Master Protein	Q61733	28S ribosomal protein S31, mitochondrial OS=Mus musculus GN=Mrps31 PE=1 SV=1	0	32	9	50	9	384	43.9	494	50	9	0	1.078	0.984017	10.41	1.078	1.002	1.184
High	Master Protein	Q9QZE5	Coatomer subunit gamma-1 OS=Mus musculus GN=Copg1 PE=1 SV=1	0	47	25	181	23	874	97.5	3744	181	25	2	1.117	0.938879	5.19	1.078	1.117	1.168
High	Master Protein	Q8CEE7	Retinol dehydrogenase 13 OS=Mus musculus GN=Rdh13 PE=1 SV=1	0	26	6	17	6	334	36.4	241	17	6	0	1.078	0.984558	45.91	1.078	1.522	0.744
High	Master Protein	Q8K0D5	Elongation factor G, mitochondrial OS=Mus musculus GN=Gfm1 PE=1 SV=1	0	15	8	23	8	751	83.5	238	23	8	0	1.078	0.9873	22.81	1.078	0.912	1.267
High	Master Protein	Q99JI4	26S proteasome non-ATPase regulatory subunit 6 OS=Mus musculus GN=Psmd6 PE=1 SV=1	0	35	12	104	12	389	45.5	1585	104	12	0	1.083	0.964991	0.78	1.077	1.083	1.267
High	Master Protein	Q9CQF3	Cleavage and polyadenylation specificity factor subunit 5 OS=Mus musculus GN=Nudt21 PE=1 SV=1	0	47	10	76	10	227	26.2	1130	76	10	0	1.077	0.984017	16.88	1.077	1.2	0.844
High	Master Protein	O09044	Synaptosomal-associated protein 23 OS=Mus musculus GN=Snap23 PE=1 SV=1	0	42	6	69	5	210	23.2	1030	69	6	0	1.077	0.988026	8.42	1.077	1.511	1.016
High	Master Protein	G3X9Y5	Ubiquitin conjugation factor E4 A OS=Mus musculus GN=Ube4a PE=1 SV=1	0	16	11	44	11	1085	124.4	755	44	11	0	1.104	0.975435	3.71	1.077	1.104	1.15
High	Master Protein	D3Z4U0	Zinc finger Ran-binding domain-containing protein 2 OS=Mus musculus GN=Zranb2 PE=1 SV=2	0	31	9	73	9	320	36.3	840	73	9	0	0.877	0.522492	0.12	1.077	0.876	0.877
High	Master Protein	Q6IRU5	Clathrin light chain B OS=Mus musculus GN=Cltb PE=1 SV=1	0	42	11	220	11	229	25.2	4680	220	11	0	0.945	0.938444	8.54	1.077	0.945	0.893
High	Master Protein	Q9CSU0	Regulation of nuclear pre-mRNA domain-containing protein 1B OS=Mus musculus GN=Rprd1b PE=1 SV=2	0	47	12	196	9	326	36.9	5171	196	12	3	0.942	0.894632	16.9	1.077	0.942	0.846
High	Master Protein	P35279	Ras-related protein Rab-6A OS=Mus musculus GN=Rab6a PE=1 SV=4	0	67	14	160	7	208	23.6	1644	160	14	8	1.077	0.930091	4.67	1.077	0.947	1.11
High	Master Protein	Q6ZWQ0	Nesprin-2 OS=Mus musculus GN=Syne2 PE=1 SV=2	0	14	63	229	59	6874	782.2	2138	229	63	1	1.113	0.964989	4.83	1.077	1.185	1.113
High	Master Protein	Q80XC6	Protein NRDE2 homolog OS=Mus musculus GN=Nrde2 PE=1 SV=3	0	5	4	16	4	1172	133.4	101	16	4	0	1.077	0.990937	2.72	1.077	1.057	1.131
High	Master Protein	J3KMT7	Transducin-like enhancer protein 3 OS=Mus musculus GN=Tle3 PE=1 SV=1	0	6	3	6	1	783	84.5	54	6	3	1	0.751	0.688028	19.19	1.076	0.751	0.665
High	Master Protein	Q921L5	Conserved oligomeric Golgi complex subunit 2 OS=Mus musculus GN=Cog2 PE=1 SV=2	0	19	8	18	8	731	82	137	18	8	0	0.975	0.976363	6.17	1.076	0.975	0.936
High	Master Protein	P45952	Medium-chain specific acyl-CoA dehydrogenase, mitochondrial OS=Mus musculus GN=Acadm PE=1 SV=1	0	45	16	91	16	421	46.5	1368	91	16	0	1.076	0.966804	21.7	1.076	1.234	0.914
High	Master Protein	Q61136	Serine/threonine-protein kinase PRP4 homolog OS=Mus musculus GN=Prpf4b PE=1 SV=3	0	16	12	90	12	1007	116.9	1566	90	12	0	1.026	0.999996	7.28	1.076	1.026	0.97
High	Master Protein	Q8K221	Arfaptin-2 OS=Mus musculus GN=Arfip2 PE=1 SV=2	0	28	6	41	6	341	37.7	1046	41	6	0	0.854	0.599945	30.6	1.076	0.681	0.854
High	Master Protein	Q61183	Poly(A) polymerase alpha OS=Mus musculus GN=Papola PE=1 SV=4	0	13	5	18	5	739	82.3	149	18	5	0	1.076	0.993902	14.94	1.076	0.967	1.224
High	Master Protein	P09405	Nucleolin OS=Mus musculus GN=Ncl PE=1 SV=2	0	38	30	771	30	707	76.7	24209	771	30	0	0.925	0.888909	0.82	1.076	0.92	0.925
High	Master Protein	Q50H33	BTB/POZ domain-containing protein KCTD8 OS=Mus musculus GN=Kctd8 PE=1 SV=1	0	21	8	66	7	476	52.7	1366	66	8	1	1.076	0.991283	1.22	1.076	1.067	1.103
High	Master Protein	Q9WVK4	EH domain-containing protein 1 OS=Mus musculus GN=Ehd1 PE=1 SV=1	0	48	20	103	11	534	60.6	929	103	20	1	1.076	0.983634	3.97	1.076	1.047	1.347
High	Master Protein	Q9DBS2	Tumor protein p63-regulated gene 1-like protein OS=Mus musculus GN=Tprg1l PE=1 SV=1	0	42	7	70	7	266	29.8	442	70	7	0	1.076	0.985275	15.38	1.076	0.93	1.187
High	Master Protein	Q91ZX6	Sentrin-specific protease 2 OS=Mus musculus GN=Senp2 PE=1 SV=2	0	5	2	9	2	588	67.5	113	9	2	0	0.858	0.915885	30.02	1.075	0.858	0.649
High	Master Protein	Q91VJ5	Polyglutamine-binding protein 1 OS=Mus musculus GN=Pqbp1 PE=1 SV=1	0	16	3	14	3	263	30.6	158	14	3	0	0.953	0.955139	16.82	1.075	0.953	0.625
High	Master Protein	Q99P58	Ras-related protein Rab-27B OS=Mus musculus GN=Rab27b PE=1 SV=3	0	29	6	28	4	218	24.5	318	28	6	1	0.896	0.847052	24.66	1.075	0.698	0.896
High	Master Protein	Q8CAY6	Acetyl-CoA acetyltransferase, cytosolic OS=Mus musculus GN=Acat2 PE=1 SV=2	0	50	11	85	11	397	41.3	1075	85	11	0	1.075	0.993902	6.65	1.075	1.027	1.728
High	Master Protein	Q99JX7	Nuclear RNA export factor 1 OS=Mus musculus GN=Nxf1 PE=1 SV=3	0	42	19	107	19	618	70.3	1403	107	19	0	1.051	0.999996	3.25	1.075	1.051	1.028
High	Master Protein	Q9R1P3	Proteasome subunit beta type-2 OS=Mus musculus GN=Psmb2 PE=1 SV=1	0	75	13	158	13	201	22.9	2402	158	13	0	1.075	0.978526	28.27	1.075	0.87	1.703
High	Master Protein	E9PV45	Ubiquitin carboxyl-terminal hydrolase 24 OS=Mus musculus GN=Usp24 PE=1 SV=1	0	5	8	26	8	2618	293.9	184	26	8	0	1.075	0.985275	28.14	1.075	1.279	0.846
High	Master Protein	E9QAS5	Chromodomain-helicase-DNA-binding protein 4 OS=Mus musculus GN=Chd4 PE=1 SV=1	0	47	72	739	53	1922	218.5	13519	739	72	18	1.075	0.916306	10.32	1.075	1.18	1
High	Master Protein	Q921I9	Exosome complex component RRP41 OS=Mus musculus GN=Exosc4 PE=1 SV=3	0	27	5	49	5	245	26.2	1119	49	5	0	1.075	0.982705	22.3	1.075	0.913	1.886
High	Master Protein	F8WJ64	Acyl carrier protein (Fragment) OS=Mus musculus GN=Ndufab1 PE=1 SV=1	0	25	4	122	4	128	14.4	2922	122	4	0	1.075	0.975388	10.96	1.075	0.995	1.2
High	Master Protein	Q5RIM6	Nuclear receptor co-repressor 1, isoform CRA_a OS=Mus musculus GN=Ncor1 PE=1 SV=1	0	10	18	69	12	2454	270.6	795	69	18	6	1.02	0.997037	7.97	1.075	1.02	0.911
High	Master Protein	Q99LH1	Nucleolar GTP-binding protein 2 OS=Mus musculus GN=Gnl2 PE=1 SV=2	0	12	6	14	6	728	83.3	214	14	6	0	0.858	0.731483	17.37	1.075	0.858	0.768
High	Master Protein	P48758	Carbonyl reductase [NADPH] 1 OS=Mus musculus GN=Cbr1 PE=1 SV=3	0	70	15	203	15	277	30.6	5057	203	15	0	1.088	0.902729	1.83	1.075	1.088	1.261
High	Master Protein	Q3TYD6	Serine/threonine-protein kinase LMTK2 OS=Mus musculus GN=Lmtk2 PE=1 SV=3	0	5	4	14	4	1471	160.4	82	14	4	0	1.027	0.999996	3.41	1.075	1.027	1.003
High	Master Protein	Q91WC0	Histone-lysine N-methyltransferase setd3 OS=Mus musculus GN=Setd3 PE=1 SV=1	0	14	6	34	6	594	67.1	227	34	6	0	0.886	0.899508	25.96	1.074	0.721	0.886
High	Master Protein	Q5SVQ0	Histone acetyltransferase KAT7 OS=Mus musculus GN=Kat7 PE=1 SV=1	0	8	4	21	4	613	70.6	323	21	4	0	1.016	0.993902	8.58	1.074	0.901	1.016
High	Master Protein	Q8CHG3	GRIP and coiled-coil domain-containing protein 2 OS=Mus musculus GN=Gcc2 PE=1 SV=2	0	8	11	30	11	1679	194.3	221	30	11	0	1.083	0.982705	1.19	1.074	1.083	1.112
High	Master Protein	E9Q1K0	Sorting nexin-25 OS=Mus musculus GN=Snx25 PE=1 SV=1	0	12	7	15	7	986	112.1	89	15	7	0	1.089	0.993902	2.04	1.074	1.089	1.257
High	Master Protein	Q9Z2A0	3-phosphoinositide-dependent protein kinase 1 OS=Mus musculus GN=Pdpk1 PE=1 SV=2	0	21	8	37	8	559	63.7	680	37	8	0	1.074	0.982578	33.05	1.074	1.583	0.835
High	Master Protein	Q3UTQ8	Cyclin-dependent kinase-like 5 OS=Mus musculus GN=Cdkl5 PE=1 SV=1	0	7	5	8	5	938	105.4	83	8	5	0	1.074	0.999996	3.62	1.074	1.191	1.048
High	Master Protein	Q8CCP0	Nuclear export mediator factor Nemf OS=Mus musculus GN=Nemf PE=1 SV=2	0	8	5	26	5	1064	121.1	359	26	5	0	0.889	0.897462	25.59	1.074	0.889	0.584
High	Master Protein	Q8VDP4	Cell cycle and apoptosis regulator protein 2 OS=Mus musculus GN=Ccar2 PE=1 SV=2	0	47	31	255	31	922	102.9	4501	255	31	0	1.068	0.982489	0.81	1.074	1.068	1.055
High	Master Protein	Q9Z1R4	Uncharacterized protein C6orf47 homolog OS=Mus musculus GN=D17h6s53e PE=1 SV=1	0	10	3	15	3	293	32	52	15	3	0	1.015	0.993902	8.53	1.074	0.722	1.015
High	Master Protein	Q8BWM0	Prostaglandin E synthase 2 OS=Mus musculus GN=Ptges2 PE=1 SV=3	0	53	16	188	16	384	43.3	3204	188	16	0	1.074	0.985588	22.35	1.074	1.322	0.912
High	Master Protein	Q99JX3	Golgi reassembly-stacking protein 2 OS=Mus musculus GN=Gorasp2 PE=1 SV=3	0	29	9	64	9	451	47	1888	64	9	0	1.074	0.985275	4.5	1.074	1.041	1.345
High	Master Protein	Q3TRM4	Neuropathy target esterase OS=Mus musculus GN=Pnpla6 PE=1 SV=2	0	6	6	20	5	1355	149.4	595	20	6	1	1.074	0.9873	23.82	1.074	0.866	1.246
High	Master Protein	Q8BVI4	Dihydropteridine reductase OS=Mus musculus GN=Qdpr PE=1 SV=2	0	57	10	124	10	241	25.6	3630	124	10	0	1.074	0.982705	34.47	1.074	0.816	1.323
High	Master Protein	P61982	14-3-3 protein gamma OS=Mus musculus GN=Ywhag PE=1 SV=2	0	83	18	1264	11	247	28.3	32359	1264	18	7	1.103	0.837614	3.97	1.074	1.103	1.159
High	Master Protein	Q8CCK0	Core histone macro-H2A.2 OS=Mus musculus GN=H2afy2 PE=1 SV=3	0	53	19	517	17	372	40.1	13447	517	19	0	1.073	0.919899	1.5	1.073	0.964	1.084
High	Master Protein	Q9D6R2	Isocitrate dehydrogenase [NAD] subunit alpha, mitochondrial OS=Mus musculus GN=Idh3a PE=1 SV=1	0	45	19	560	19	366	39.6	10135	560	19	0	1.073	0.920088	19.71	1.073	0.931	1.3
High	Master Protein	Q91VT4	Carbonyl reductase family member 4 OS=Mus musculus GN=Cbr4 PE=1 SV=2	0	32	6	16	6	236	25.4	396	16	6	0	1.078	0.976363	0.6	1.073	1.748	1.078
High	Master Protein	P63328	Serine/threonine-protein phosphatase 2B catalytic subunit alpha isoform OS=Mus musculus GN=Ppp3ca PE=1 SV=1	0	50	20	140	13	521	58.6	2456	140	20	8	1.073	0.974715	1.35	1.073	1.039	1.083
High	Master Protein	Q5SWN2	Replication protein A 70 kDa DNA-binding subunit OS=Mus musculus GN=Rpa1 PE=1 SV=2	0	26	13	34	13	644	71.4	614	34	13	0	1.073	0.9873	4.61	1.073	1.107	0.888
High	Master Protein	O35874	Neutral amino acid transporter A OS=Mus musculus GN=Slc1a4 PE=1 SV=1	0	15	5	73	5	532	56	1610	73	5	0	1.073	0.95823	5.66	1.073	0.951	1.114
High	Master Protein	Q7SIG6	Arf-GAP with SH3 domain, ANK repeat and PH domain-containing protein 2 OS=Mus musculus GN=Asap2 PE=1 SV=3	0	32	19	110	18	958	106.7	1424	110	19	1	1.103	0.977408	4	1.073	1.103	1.215
High	Master Protein	D3Z5A2	Anion exchange protein 3 (Fragment) OS=Mus musculus GN=Slc4a3 PE=1 SV=1	0	26	5	70	1	227	25.6	1093	70	5	0	1.093	0.984017	2.76	1.073	1.093	1.119
High	Master Protein	Q9D0P0	Emopamil-binding protein-like OS=Mus musculus GN=Ebpl PE=2 SV=1	0	5	2	17	2	206	23.3	310	17	2	0	1.056	0.993902	2.31	1.073	0.826	1.056
High	Master Protein	E9PX50	Sodium/calcium exchanger 3 OS=Mus musculus GN=Slc8a3 PE=1 SV=2	0	13	8	29	6	927	102.9	484	29	8	2	1.073	0.98287	3.84	1.073	1.045	1.775
High	Master Protein	Q7TQI3	Ubiquitin thioesterase OTUB1 OS=Mus musculus GN=Otub1 PE=1 SV=2	0	53	12	192	12	271	31.3	3621	192	12	0	1.072	0.984017	20.35	1.072	0.925	1.461
High	Master Protein	E9PU87	Serine/threonine-protein kinase SIK3 OS=Mus musculus GN=Sik3 PE=1 SV=1	0	18	15	61	2	1369	150.6	906	61	15	13	1.019	0.994535	1.56	1.072	1.008	1.019
High	Master Protein	Q8BUY8	G-protein coupled receptor-associated sorting protein 2 OS=Mus musculus GN=Gprasp2 PE=1 SV=2	0	12	7	37	7	826	92.7	246	37	7	0	1.072	0.984017	4.61	1.072	1.105	0.756
High	Master Protein	Q62178	Semaphorin-4A OS=Mus musculus GN=Sema4a PE=1 SV=2	0	10	4	13	4	760	83.4	53	13	4	0	1.072	0.999849	3.1	1.072	0.714	1.094
High	Master Protein	Q3TVI4	Protein HEXIM2 OS=Mus musculus GN=Hexim2 PE=1 SV=1	0	5	1	11	1	313	35.4	212	11	1	0	1.038	0.999996	4.8	1.072	0.965	1.038
High	Master Protein	A0A0U1RNL1	Myc-associated zinc finger protein OS=Mus musculus GN=Maz PE=1 SV=1	0	19	8	49	5	454	46.5	221	49	8	1	1.072	0.984017	13.29	1.072	1.168	0.919
High	Master Protein	Q9ES34	Ubiquitin-protein ligase E3B OS=Mus musculus GN=Ube3b PE=1 SV=3	0	11	8	15	8	1070	122.7	50	15	8	0	1.072	0.987348	20.67	1.072	1.529	0.922
High	Master Protein	O54988	STE20-like serine/threonine-protein kinase OS=Mus musculus GN=Slk PE=1 SV=2	0	21	17	60	16	1233	141.4	513	60	17	1	1.168	0.895299	12.25	1.072	1.168	1.366
High	Master Protein	D3YWN7	Ensconsin OS=Mus musculus GN=Map7 PE=1 SV=2	0	39	22	230	1	738	82.8	2353	230	22	22	0.928	0.766412	19.89	1.071	0.928	0.799
High	Master Protein	Q9D880	Mitochondrial import inner membrane translocase subunit TIM50 OS=Mus musculus GN=Timm50 PE=1 SV=1	0	33	10	92	10	353	39.8	996	92	10	0	0.919	0.865485	1.38	1.071	0.91	0.919
High	Master Protein	Q9D0J8	Parathymosin OS=Mus musculus GN=Ptms PE=1 SV=3	0	23	2	20	2	101	11.4	512	20	2	0	1.071	0.993902	45.62	1.071	0.713	1.401
High	Master Protein	Q8BHE8	m-AAA protease-interacting protein 1, mitochondrial OS=Mus musculus GN=Maip1 PE=1 SV=1	0	8	2	10	2	291	33	221	10	2	0	1.017	0.999996	4.2	1.071	1.017	0.988
High	Master Protein	Q99LF4	tRNA-splicing ligase RtcB homolog OS=Mus musculus GN=Rtcb PE=1 SV=1	0	63	27	517	27	505	55.2	12771	517	27	0	1.071	0.925908	5.16	1.071	1.159	1.034
High	Master Protein	Q99PM3	Transcription initiation factor IIA subunit 1 OS=Mus musculus GN=Gtf2a1 PE=2 SV=2	0	10	3	27	3	378	41.6	541	27	3	0	1.117	0.964614	6.16	1.071	1.117	1.212
High	Master Protein	Q8CAA7	Glucose 1,6-bisphosphate synthase OS=Mus musculus GN=Pgm2l1 PE=1 SV=1	0	43	21	197	21	621	70.2	4943	197	21	0	1.071	0.975388	14.65	1.071	0.965	1.431
High	Master Protein	Q64012	RNA-binding protein Raly OS=Mus musculus GN=Raly PE=1 SV=3	0	58	17	202	3	312	33.2	6248	202	17	15	0.964	0.976363	7.09	1.071	0.92	0.964
[truncated: 2,732 more rows]
